# Supplementary material for: Label-free quantitative proteomics of the MCF-7 cellular response to a ferritin–metallodrug complex
Source: Royal Society of Chemistry journal article supplement (doi:10.1039/c9mo00158a), 2020-01-17
Supplement: c9mo00158a1.xlsx [file c9mo00158a1.xlsx]

## Sheet: 1794 proteins
		A = Ferritin +AUOXO3; B = Control; C= AUOXO3 no ferritin
		Significant changes 0.6 < fold values > 1.5
Protein IDs	Protein names	Gene names	LFQ intensity exp_a_01	LFQ intensity exp_a_02	Average LFQ A	LFQ intensity exp_b_01	LFQ intensity exp_b_02	Average LFQ B	LFQ intensity exp_c_01	LFQ intensity exp_c_02	Average LFQ C	Ratio A/B	Ratio C/B	Ratio A/C	FOLD A/B	FOLD C/B	FOLD A/C	ANOVA Significant	Peptides	Razor + unique peptides	Unique peptides	Sequence coverage [%]	Unique + razor sequence coverage [%]	Unique sequence coverage [%]	Mol, weight [kDa]	Score	Intensity	MS/MS count	Peptides exp_a_01	Peptides exp_a_02	Peptides exp_b_01	Peptides exp_b_02	Peptides exp_c_01	Peptides exp_c_02	Razor + unique peptides exp_a_01	Razor + unique peptides exp_a_02	Razor + unique peptides exp_b_01	Razor + unique peptides exp_b_02	Razor + unique peptides exp_c_01	Razor + unique peptides exp_c_02	Unique peptides exp_a_01	Unique peptides exp_a_02	Unique peptides exp_b_01	Unique peptides exp_b_02	Unique peptides exp_c_01	Unique peptides exp_c_02	Sequence coverage exp_a_01 [%]	Sequence coverage exp_a_02 [%]	Sequence coverage exp_b_01 [%]
P00338;P07195;Q6ZMR3;P07864	L-lactate dehydrogenase A chain	LDHA	30.1702	30.1727	30.1715	28.7227	28.901	28.8119	29.2473	24.9944	27.1208	1.3596	-1.69105	3.05064	2.56613	0.309701	8.28582	+	26	26	26	75.9	75.9	75.9	36.688	323.31	4585500000	645	18	13	12	15	22	10	18	13	12	15	22	10	18	13	12	15	22	10	44	36.7	32.2
Q04828	Aldo-keto reductase family 1 member C1	AKR1C1	29.1963	27.9638	28.5801	24.8849	25.6956	25.2903	29.7415	29.6097	29.6756	3.2898	4.38536	-1.09555	9.77977	20.8989	0.467956	+	26	26	2	78	78	10.5	36.788	323.31	2177300000	388	15	11	6	5	23	20	15	11	6	5	23	20	0	0	0	0	2	1	41.8	37.8	14.6
P60842	Eukaryotic initiation factor 4A-I	EIF4A1	26.9473	26.4961	26.7217	26.3133	26.807	26.5601	28.0536	27.521	27.7873	0.161555	1.22715	-1.06559	1.11849	2.34104	0.477776		28	28	17	69.2	69.2	42.9	46.153	323.31	1180800000	517	20	15	20	19	17	23	20	15	20	19	17	23	10	7	11	10	11	14	46.6	36.7	41.6
P31947	14-3-3 protein sigma	SFN	28.0102	27.7448	27.8775	27.3906	26.6228	27.0067	27.3253	27.6398	27.4825	0.870805	0.475805	0.395	1.82868	1.39069	1.31494		20	17	17	69	61.7	61.7	27.774	163.76	1242900000	254	15	14	16	16	14	13	12	11	13	13	12	11	12	11	13	13	12	11	48	51.2	51.6
P31939	Bifunctional purine biosynthesis protein PURH;Phosphoribosylaminoimidazolecarboxamide formyltransferase;IMP cyclohydrolase	ATIC	28.0487	27.1283	27.5885	27.2268	26.8703	27.0486	27.553	27.6272	27.5901	0.53991	0.54151	-0.0016	1.45388	1.4555	0.998892		45	45	45	81.9	81.9	81.9	64.615	323.31	1582600000	710	36	27	23	29	37	38	36	27	23	29	37	38	36	27	23	29	37	38	74.5	56.2	48
P28074	Proteasome subunit beta type-5	PSMB5	27.3968	26.9235	27.1602	26.0558	27.2172	26.6365	27.5603	26.9814	27.2708	0.52368	0.63435	-0.11067	1.43762	1.55224	0.926158		17	17	17	62.7	62.7	62.7	28.48	304.36	427160000	336	13	11	9	11	16	14	13	11	9	11	16	14	13	11	9	11	16	14	49.8	33.8	31.2
P22626	Heterogeneous nuclear ribonucleoproteins A2/B1	HNRNPA2B1	27.4051	26.3352	26.8702	26.795	26.8274	26.8112	27.5091	27.5755	27.5423	0.058985	0.7311	-0.672115	1.04173	1.6599	0.627586		26	26	26	70.3	70.3	70.3	37.429	323.31	563500000	455	12	9	13	11	22	22	12	9	13	11	22	22	12	9	13	11	22	22	31.7	20.4	39.4
P07355	Annexin A2	ANXA2	26.9003	27.1275	27.0139	26.6744	27.5928	27.1336	27.6854	28.1719	27.9287	-0.11965	0.79511	-0.91476	0.920411	1.73521	0.530432		30	30	10	72	72	23.3	38.604	323.31	1014400000	517	23	19	20	19	26	21	23	19	20	19	26	21	5	6	5	5	9	5	60.2	51	51
P22314	Ubiquitin-like modifier-activating enzyme 1	UBA1	27.7091	27.0873	27.3982	27.1249	27.5016	27.3133	27.9627	28.6233	28.293	0.084945	0.97975	-0.894805	1.06065	1.97212	0.53782		49	49	49	60.5	60.5	60.5	117.85	323.31	2028400000	1088	30	21	25	26	43	39	30	21	25	26	43	39	30	21	25	26	43	39	35.5	24.3	29.4
P62899	60S ribosomal protein L31	RPL31	26.3319	27.2608	26.7964	27.6897	27.092	27.3909	26.7945	26.9951	26.8948	-0.5945	-0.496055	-0.098445	0.662274	0.709043	0.934039		9	9	9	51.2	51.2	51.2	14.463	124.1	224120000	91	5	2	2	3	8	7	5	2	2	3	8	7	5	2	2	3	8	7	36	15.2	15.2
P62269	40S ribosomal protein S18	RPS18	27.5051	27.0755	27.2903	27.7617	26.7161	27.2389	26.7488	27.6651	27.207	0.051415	-0.0319	0.083315	1.03628	0.978131	1.05945		10	10	10	46.7	46.7	46.7	17.718	80.587	310660000	216	7	6	6	7	9	6	7	6	6	7	9	6	7	6	6	7	9	6	38.8	33.6	32.9
P55060	Exportin-2	CSE1L	27.3704	27.0612	27.2158	27.4124	27.3223	27.3674	27.6587	27.1235	27.3911	-0.15161	0.0237	-0.17531	0.900245	1.01656	0.885577		52	52	52	56	56	56	110.42	323.31	1089300000	636	28	22	22	24	48	38	28	22	22	24	48	38	28	22	22	24	48	38	32.6	24.7	23.2
P50990	T-complex protein 1 subunit theta	CCT8	27.118	27.1219	27.12	27.5756	27.3287	27.4522	27.6003	27.2907	27.4455	-0.332205	-0.00666	-0.325545	0.794322	0.995394	0.797997		43	43	43	73.7	73.7	73.7	59.62	323.31	1285300000	711	34	26	32	30	36	24	34	26	32	30	36	24	34	26	32	30	36	24	65	47.1	56.9
P49588	Alanine--tRNA ligase, cytoplasmic	AARS	27.7761	27.393	27.5845	27.7471	27.1022	27.4247	27.241	27.4839	27.3625	0.15988	-0.0622	0.22208	1.11719	0.957802	1.16641		49	49	49	61.8	61.8	61.8	106.81	323.31	1761500000	800	30	23	23	25	41	39	30	23	23	25	41	39	30	23	23	25	41	39	37.5	25.9	25.3
P31949	Protein S100-A11;Protein S100-A11, N-terminally processed	S100A11	26.1098	27.2549	26.6823	27.1589	26.8014	26.9802	27.3174	27.0333	27.1754	-0.297845	0.195165	-0.49301	0.813467	1.14486	0.710541		5	5	5	46.7	46.7	46.7	11.74	132.68	220570000	78	3	2	2	2	4	4	3	2	2	2	4	4	3	2	2	2	4	4	21	17.1	17.1
P31946	14-3-3 protein beta/alpha;14-3-3 protein beta/alpha, N-terminally processed	YWHAB	27.6226	27.4247	27.5236	28.0315	27.8758	27.9537	26.9944	27.2549	27.1246	-0.43004	-0.82903	0.39899	0.742241	0.562908	1.31858		21	14	12	80.5	58.9	52.4	28.082	323.31	1108700000	358	13	11	15	13	14	14	9	7	10	8	10	11	7	6	8	7	9	10	54.1	49.6	56.9
P27348	14-3-3 protein theta	YWHAQ	27.6017	27.0156	27.3086	28.0997	27.4649	27.7823	27.3732	27.5602	27.4667	-0.473675	-0.31563	-0.158045	0.720128	0.8035	0.896239		21	16	16	72.2	61.2	61.2	27.764	323.31	1151100000	359	16	14	19	17	15	14	12	10	14	12	13	12	12	10	14	12	13	12	56.3	53.5	66.1
P26641	Elongation factor 1-gamma	EEF1G	26.9636	26.8157	26.8896	27.3495	27.4266	27.3881	27.2724	27.5832	27.4278	-0.498445	0.03973	-0.538175	0.707869	1.02792	0.688641	+	26	26	26	59.7	59.7	59.7	50.118	271.26	1129400000	473	15	14	14	19	21	20	15	14	14	19	21	20	15	14	14	19	21	20	33.9	30.4	31.4
P19338	Nucleolin	NCL	27.2074	27.5895	27.3985	28.0973	28.2155	28.1564	26.7864	27.4349	27.1107	-0.757935	-1.0457	0.28777	0.591342	0.484408	1.22075		37	37	37	39.4	39.4	39.4	76.613	323.31	1652000000	731	20	16	23	17	30	24	20	16	23	17	30	24	20	16	23	17	30	24	30.1	21.3	29.3
P07437;A6NNZ2	Tubulin beta chain	TUBB	27.1742	26.102	26.6381	28.0941	27.1009	27.5975	26.1991	28.5526	27.3758	-0.95942	-0.221685	-0.737735	0.514264	0.857563	0.59968		26	6	5	62.8	19.6	16.2	49.67	206.1	1100400000	604	22	16	20	21	22	24	5	3	5	4	6	6	4	2	4	3	5	5	56.8	36.9	46.6
P09972	Fructose-bisphosphate aldolase C	ALDOC	25.6305	28.0634	26.8469	27.7113	27.5367	27.624	27.4309	27.3454	27.3882	-0.777075	-0.23586	-0.541215	0.583549	0.849179	0.687192		16	11	11	45.3	33.5	33.5	39.455	172.19	1385600000	422	7	11	11	10	9	5	4	7	8	7	7	3	4	7	8	7	7	3	23.9	36	36
Q00610	Clathrin heavy chain 1	CLTC	27.502	27.3269	27.4145	27.5946	27.6252	27.6099	28.9657	29.2457	29.1057	-0.19545	1.49576	-1.69121	0.8733	2.82014	0.309666		98	98	77	63.7	63.7	52.8	191.61	323.31	2130900000	1568	57	56	45	48	91	86	57	56	45	48	91	86	40	42	33	37	72	68	36.7	39.2	30
P11586	C-1-tetrahydrofolate synthase, cytoplasmic;Methylenetetrahydrofolate dehydrogenase;Methenyltetrahydrofolate cyclohydrolase;Formyltetrahydrofolate synthetase;C-1-tetrahydrofolate synthase, cytoplasmic, N-terminally processed	MTHFD1	26.4249	26.5672	26.496	28.5948	27.9395	28.2671	28.0373	28.1681	28.1027	-1.77113	-0.164415	-1.60671	0.29298	0.89229	0.328346	+	53	53	53	61.4	61.4	61.4	101.56	323.31	1861800000	998	31	24	32	31	50	47	31	24	32	31	50	47	31	24	32	31	50	47	34	27.5	33.7
P10809	60 kDa heat shock protein, mitochondrial	HSPD1	27.1228	27.3554	27.2391	28.4807	27.3301	27.9054	28.425	28.0342	28.2296	-0.66631	0.324195	-0.990505	0.630116	1.25197	0.503302		40	40	40	70.7	70.7	70.7	61.054	323.31	2029500000	812	27	16	24	23	33	30	27	16	24	23	33	30	27	16	24	23	33	30	50.6	30.7	38
O00299	Chloride intracellular channel protein 1	CLIC1	26.9378	27.8282	27.383	27.6078	26.9731	27.2905	28.1834	28.1965	28.19	0.09251	0.899515	-0.807005	1.06622	1.86544	0.571567		15	15	15	63.9	63.9	63.9	26.922	323.31	1259100000	333	14	11	11	11	14	15	14	11	11	11	14	15	14	11	11	11	14	15	63.9	59.8	59.8
P04792	Heat shock protein beta-1	HSPB1	26.2031	26.5879	26.3955	28.5588	27.3238	27.9413	30.2896	29.6483	29.9689	-1.5458	2.02763	-3.57343	0.342506	4.07733	0.0840024		24	24	24	90.7	90.7	90.7	22.782	288.13	1684300000	763	10	8	14	13	23	21	10	8	14	13	23	21	10	8	14	13	23	21	49.8	43.9	75.6
P40926	Malate dehydrogenase, mitochondrial	MDH2	28.2975	28.3927	28.3451	28.2748	29.2714	28.7731	27.4997	28.1036	27.8016	-0.427975	-0.971445	0.54347	0.743304	0.509995	1.45747		18	18	18	63.9	63.9	63.9	35.503	323.31	2524400000	661	16	14	16	17	16	15	16	14	16	17	16	15	16	14	16	17	16	15	59.5	47.9	51.8
P40925	Malate dehydrogenase, cytoplasmic	MDH1	27.8598	28.3585	28.1091	27.6401	28.8698	28.2549	27.3719	27.3887	27.3803	-0.145835	-0.874665	0.72883	0.903856	0.54538	1.65729		19	19	19	58.4	58.4	58.4	36.426	323.31	1745800000	318	10	12	13	14	15	11	10	12	13	14	15	11	10	12	13	14	15	11	39.2	39.2	42.2
P13647	Keratin, type II cytoskeletal 5	KRT5	28.246	28.4869	28.3664	28.7634	27.7654	28.2644	26.972	27.1384	27.0552	0.10203	-1.2092	1.31123	1.07328	0.432507	2.48154		49	25	24	56.1	38.1	35.6	62.378	287.76	1476400000	1062	31	31	36	25	37	31	19	19	20	16	19	16	18	19	19	16	19	16	42.2	44.9	48.3
P07339;A0A1B0GU03	Cathepsin D;Cathepsin D light chain;Cathepsin D heavy chain	CTSD	28.8671	28.7661	28.8166	28.8079	29.0634	28.9357	27.3214	27.3854	27.3534	-0.11904	-1.58226	1.46322	0.9208	0.333958	2.75723		19	19	19	49	49	49	44.552	304.85	2847200000	672	16	15	15	13	14	18	16	15	15	13	14	18	16	15	15	13	14	18	41.5	38.3	38.3
P02533;Q8N1A0	Keratin, type I cytoskeletal 14	KRT14	28.1839	29.0353	28.6096	29.3979	28.2814	28.8396	27.2938	27.3438	27.3188	-0.23008	-1.52087	1.29078	0.852588	0.348477	2.44661		41	36	12	61.4	56.1	28	51.561	323.31	2167100000	1427	26	23	30	15	30	23	22	19	25	12	26	19	7	6	7	3	9	5	50.8	50	56.4
P05783	Keratin, type I cytoskeletal 18	KRT18	28.4917	28.1364	28.314	29.0074	28.7838	28.8956	27.7446	27.4344	27.5895	-0.581535	-1.30605	0.724515	0.668252	0.404427	1.65235		36	34	33	81.2	77.4	77.4	48.057	323.31	3299400000	615	22	18	23	23	24	22	20	16	21	21	22	20	19	15	20	20	22	20	51.9	46.3	53.5
Q02790	Peptidyl-prolyl cis-trans isomerase FKBP4;Peptidyl-prolyl cis-trans isomerase FKBP4, N-terminally processed	FKBP4	28.2366	27.6665	27.9515	28.0851	28.0432	28.0641	28.2369	27.4829	27.8599	-0.112615	-0.20423	0.091615	0.92491	0.868002	1.06556		44	44	44	81.3	81.3	81.3	51.804	323.31	2219100000	866	32	20	28	27	33	31	32	20	28	27	33	31	32	20	28	27	33	31	75.8	55.3	65.6
P68431;Q16695;Q6NXT2	Histone H3.1;Histone H3.1t	HIST1H3A;HIST3H3	28.874	27.2233	28.0486	28.6684	28.2671	28.4678	29.8636	27.3025	28.5831	-0.419155	0.11529	-0.534445	0.747863	1.08319	0.690424		5	5	1	43.4	43.4	23.5	15.404	65.138	768900000	124	3	3	2	2	5	4	3	3	2	2	5	4	0	0	0	0	1	0	13.2	13.2	10.3
P08727	Keratin, type I cytoskeletal 19	KRT19	28.6495	28.0494	28.3495	29.3629	28.5463	28.9546	28.5244	28.4609	28.4927	-0.605135	-0.461945	-0.14319	0.65741	0.726007	0.905515		39	31	25	79.2	70	59.2	44.105	323.31	3166100000	764	25	29	30	27	32	32	20	23	24	23	25	24	18	18	20	18	20	19	51.8	61.8	58.2
P06744;Q8N196	Glucose-6-phosphate isomerase	GPI	29.782	28.144	28.963	28.8396	28.5622	28.7009	28.0526	28.1798	28.1162	0.262065	-0.58473	0.846795	1.19919	0.666774	1.7985		27	27	24	60.8	60.8	52.2	63.146	323.31	4330200000	723	22	17	15	19	21	20	22	17	15	19	21	20	19	16	13	17	19	17	51.8	32.8	29
P07237	Protein disulfide-isomerase	P4HB	28.8041	27.7665	28.2853	28.8855	27.9791	28.4323	27.6481	27.1533	27.4007	-0.146985	-1.03156	0.88457	0.903136	0.489183	1.84621		34	34	34	65	65	65	57.116	323.31	2899600000	718	27	21	28	26	25	26	27	21	28	26	25	26	27	21	28	26	25	26	57.3	41.1	48.2
P50395	Rab GDP dissociation inhibitor beta	GDI2	28.39	28.1265	28.2582	27.8739	28.2913	28.0826	28.0475	27.9987	28.0231	0.17568	-0.059475	0.235155	1.1295	0.959613	1.17703		42	42	32	76.2	76.2	58.9	50.663	323.31	2541500000	908	34	21	25	29	35	33	34	21	25	29	35	33	24	14	17	21	25	23	73.3	50.6	53.7
P37837	Transaldolase	TALDO1	29.3279	28.7625	29.0452	27.8855	27.9176	27.9016	27.3679	27.6957	27.5318	1.14363	-0.3698	1.51342	2.20935	0.77389	2.85487		29	29	29	57.9	57.9	57.9	37.54	126.29	2019700000	409	15	14	15	16	18	18	15	14	15	16	18	18	15	14	15	16	18	18	42.7	37.7	42.1
P30086	Phosphatidylethanolamine-binding protein 1;Hippocampal cholinergic neurostimulating peptide	PEBP1	29.345	27.2254	28.2852	25.8257	28.3728	27.0993	28.1409	28.2492	28.195	1.18593	1.09574	0.09018	2.27509	2.13723	1.0645		16	16	16	82.4	82.4	82.4	21.057	299.1	775930000	294	9	7	6	8	16	14	9	7	6	8	16	14	9	7	6	8	16	14	56.7	49.2	41.2
P30041	Peroxiredoxin-6	PRDX6	28.2319	27.6861	27.959	27.651	28.2328	27.9419	27.9957	28.0627	28.0292	0.01706	0.08725	-0.07019	1.0119	1.06234	0.952513		24	24	24	79.5	79.5	79.5	25.035	323.31	1141600000	468	12	10	15	10	22	20	12	10	15	10	22	20	12	10	15	10	22	20	56.2	39.3	57.1
P29373	Cellular retinoic acid-binding protein 2	CRABP2	28.3146	28.3898	28.3522	26.3115	28.3933	27.3524	27.7656	27.6223	27.6939	0.9998	0.341515	0.658285	1.99972	1.26709	1.57821		16	16	15	79.7	79.7	79.7	15.693	169.89	440490000	267	10	8	6	9	14	13	10	8	6	9	14	13	9	7	5	8	13	12	63.8	52.2	35.5
P23526	Adenosylhomocysteinase	AHCY	28.1284	28.0865	28.1075	27.0092	27.9787	27.494	27.3775	27.2584	27.3179	0.613525	-0.17604	0.789565	1.52999	0.885129	1.72855		23	23	23	44.9	44.9	44.9	47.716	137.27	2122800000	416	20	17	14	19	13	10	20	17	14	19	13	10	20	17	14	19	13	10	43.1	35.9	32.2
P22392	Nucleoside diphosphate kinase B	NME2	30.1862	27.9273	29.0568	27.5917	28.4256	28.0087	29.423	28.7072	29.0651	1.04809	1.05645	-0.00835	2.0678	2.0798	0.994229		16	16	4	84.2	84.2	21.7	17.298	199.85	1739300000	543	11	9	6	9	13	12	11	9	6	9	13	12	1	0	0	0	3	2	57.9	48	42.8
P21333	Filamin-A	FLNA	29.1822	29.7022	29.4422	27.9227	28.3052	28.1139	28.2285	28.4871	28.3578	1.32824	0.243895	1.08435	2.51097	1.18419	2.12042		137	137	126	66.9	66.9	64.9	280.74	323.31	3637700000	2307	85	92	78	75	115	107	85	92	78	75	115	107	77	84	74	69	109	100	42.9	47.8	38.4
P0DMV9;P0DMV8	Heat shock 70 kDa protein 1B;Heat shock 70 kDa protein 1A	HSPA1B;HSPA1A	29.1457	28.676	28.9109	27.3281	27.6193	27.4737	28.9177	28.852	28.8848	1.43717	1.41113	0.026035	2.70788	2.65945	1.01821	+	55	50	34	70.7	66.5	42	70.051	323.31	3987300000	1014	29	30	21	28	45	35	25	28	18	26	43	34	15	16	8	14	31	23	45.1	46.8	32
O43707	Alpha-actinin-4	ACTN4	28.6224	28.1069	28.3647	27.3008	27.5373	27.419	27.454	26.9199	27.187	0.94567	-0.23205	1.17772	1.92608	0.851424	2.26219		70	70	48	75.6	75.6	52.6	104.85	323.31	2752700000	1249	58	41	33	41	57	49	58	41	33	41	57	49	40	28	21	26	37	30	66.2	49.7	43.5
P07737	Profilin-1	PFN1	29.757	29.266	29.5115	26.645	28.6521	27.6485	28.9651	29.0785	29.0218	1.86295	1.37323	0.48972	3.63751	2.5905	1.40417		15	15	15	78.6	78.6	78.6	15.054	323.31	948580000	494	11	7	8	8	11	10	11	7	8	8	11	10	11	7	8	8	11	10	73.6	62.9	64.3
P68371	Tubulin beta-4B chain	TUBB4B	29.5127	27.921	28.7169	29.516	29.1204	29.3182	27.7764	29.9683	28.8724	-0.601365	-0.445855	-0.15551	0.65913	0.734149	0.897815		28	28	1	67	67	2.7	49.83	323.31	4832300000	3208	25	17	21	23	24	26	25	17	21	23	24	26	1	1	1	1	1	1	67	40.7	50.3
P68363;Q9H853	Tubulin alpha-1B chain	TUBA1B	29.7933	28.1687	28.981	30.1904	30.3407	30.2656	28.4072	31.6003	30.0038	-1.28457	-0.26181	-1.02276	0.410493	0.834041	0.492174		30	30	0	73.6	73.6	0	50.151	323.31	8301700000	2530	21	19	19	22	21	29	21	19	19	22	21	29	0	0	0	0	0	0	57.9	46.6	52.1
P63104	14-3-3 protein zeta/delta	YWHAZ	29.7411	29.0447	29.3929	30.2704	29.1346	29.7025	29.4413	29.9709	29.7061	-0.30966	0.003565	-0.313225	0.806832	1.00247	0.804841		28	25	21	82.9	82.9	65.3	27.745	323.31	5085200000	804	18	14	20	16	19	21	15	11	17	13	17	19	14	10	15	11	15	18	64.5	60.8	72.2
P62937;P0DN26;A0A0B4J2A2;A0A075B767;A0A075B759;Q9Y536;F5H284;P0DN37	Peptidyl-prolyl cis-trans isomerase A;Peptidyl-prolyl cis-trans isomerase A, N-terminally processed	PPIA	29.7804	28.7071	29.2437	28.1243	28.9064	28.5153	30.158	29.413	29.7855	0.72838	1.27013	-0.54175	1.65678	2.41183	0.686937		15	15	15	82.4	82.4	82.4	18.012	323.31	1437500000	613	10	8	8	10	15	13	10	8	8	10	15	13	10	8	8	10	15	13	43.6	38.2	40
P62805	Histone H4	HIST1H4A	28.7184	27.0297	27.8741	28.4249	29.2952	28.86	29.5953	29.8589	29.7271	-0.98599	0.867035	-1.85302	0.504879	1.82391	0.276811		13	13	13	64.1	64.1	64.1	11.367	91.32	943850000	466	6	6	7	8	11	9	6	6	7	8	11	9	6	6	7	8	11	9	51.5	50.5	57.3
P62258	14-3-3 protein epsilon	YWHAE	29.1432	28.911	29.0271	28.6245	29.1396	28.882	29.5952	28.6823	29.1387	0.145075	0.2567	-0.111625	1.10579	1.19474	0.925545		28	28	25	76.9	76.9	69.8	29.174	323.31	3362600000	720	22	23	23	23	22	19	22	23	23	23	22	19	19	20	20	20	20	17	66.3	76.9	73.7
P60174	Triosephosphate isomerase	TPI1	29.9735	28.2195	29.0965	30.5594	29.0014	29.7804	31.065	30.8278	30.9464	-0.6839	1.16597	-1.84987	0.62248	2.24385	0.277416		23	23	23	80.4	80.4	80.4	30.791	323.31	6717800000	1063	17	15	19	16	17	21	17	15	19	16	17	21	17	15	19	16	17	21	63.3	62.2	79.7
Q99880;Q99879;Q99877;Q93079;Q5QNW6;P62807;P58876;P57053;O60814	Histone H2B type 1-L;Histone H2B type 1-M;Histone H2B type 1-N;Histone H2B type 1-H;Histone H2B type 2-F;Histone H2B type 1-C/E/F/G/I;Histone H2B type 1-D;Histone H2B type F-S;Histone H2B type 1-K	HIST1H2BL;HIST1H2BM;HIST1H2BN;HIST1H2BH;HIST2H2BF;HIST1H2BC;HIST1H2BD;H2BFS;HIST1H2BK	28.5447	28.3358	28.4402	29.8945	28.8843	29.3894	29.8933	29.0777	29.4855	-0.949165	0.096115	-1.04528	0.517932	1.06889	0.484551		11	11	3	58.7	58.7	9.5	13.952	118.89	1162000000	291	6	4	7	6	7	5	6	4	7	6	7	5	2	2	2	2	3	2	42.1	23.8	41.3
P52209	6-phosphogluconate dehydrogenase, decarboxylating	PGD	30.8874	28.8889	29.8882	29.1812	28.8674	29.0243	30.1494	30.129	30.1392	0.86384	1.11487	-0.25103	1.81988	2.16575	0.840296		35	35	35	69.6	69.6	69.6	53.139	323.31	8227500000	1214	24	23	22	22	31	28	24	23	22	22	31	28	24	23	22	22	31	28	53.4	50.5	45.8
P29401	Transketolase	TKT	29.5407	29.481	29.5109	27.5822	28.4347	28.0084	29.9425	30.3061	30.1243	1.50243	2.11585	-0.613425	2.8332	4.33447	0.653643		47	47	47	81.1	81.1	81.1	67.877	323.31	6636100000	1474	25	24	19	24	38	33	25	24	19	24	38	33	25	24	19	24	38	33	54.7	41.4	34
P23528	Cofilin-1	CFL1	29.2099	29.0125	29.1112	29.0694	29.076	29.0727	30.2451	29.8012	30.0232	0.03853	0.950495	-0.911965	1.02707	1.93254	0.531461		21	20	16	77.1	70.5	51.8	18.502	323.31	1783000000	379	11	4	4	8	17	18	10	3	3	8	17	18	9	2	2	7	13	14	64.5	24.1	28.9
P15559	NAD(P)H dehydrogenase [quinone] 1	NQO1	29.7143	28.9451	29.3297	28.8383	28.0117	28.425	29.5403	29.4844	29.5124	0.904705	1.08738	-0.182675	1.87216	2.12488	0.881068		22	22	22	50.7	50.7	50.7	30.867	296.04	3677300000	487	13	10	10	7	18	18	13	10	10	7	18	18	13	10	10	7	18	18	32.1	31.8	28.8
P13639	Elongation factor 2	EEF2	29.882	29.9902	29.9361	29.9556	29.9925	29.9741	29.7439	29.666	29.7049	-0.037935	-0.269125	0.23119	0.974048	0.829823	1.1738		66	66	65	70.6	70.6	69.5	95.337	323.31	8085300000	2246	43	32	38	39	59	55	43	32	38	39	59	55	42	31	37	38	58	54	51.9	36.4	38.8
P11142	Heat shock cognate 71 kDa protein	HSPA8	30.5049	30.3333	30.4191	29.0013	29.8565	29.4289	29.9221	29.9863	29.9542	0.990235	0.525325	0.46491	1.98651	1.43926	1.38023		59	59	44	74.9	74.9	57.6	70.897	323.31	11337000000	1827	41	34	34	35	46	38	41	34	34	35	46	38	29	25	23	25	35	30	63.3	57.7	52
O60701	UDP-glucose 6-dehydrogenase	UGDH	31.1236	29.9175	30.5206	29.731	29.8736	29.8023	30.8793	30.357	30.6181	0.718305	0.815855	-0.09755	1.64525	1.76034	0.934619		46	46	46	85.6	85.6	85.6	55.023	323.31	11236000000	1427	34	27	23	26	39	38	34	27	23	26	39	38	34	27	23	26	39	38	79.6	61.7	52
P08238;Q58FF7	Heat shock protein HSP 90-beta	HSP90AB1	29.8652	29.5362	29.7007	29.7449	29.6243	29.6846	30.4816	30.3978	30.4397	0.0161	0.755135	-0.739035	1.01122	1.68779	0.59914		69	50	42	77.6	63.1	59	83.263	323.31	11017000000	1933	50	46	45	48	59	54	33	29	30	30	41	37	27	22	23	22	35	31	58	55.7	52.6
P62826	GTP-binding nuclear protein Ran	RAN	28.7098	28.9645	28.8372	29.4003	29.6099	29.5051	28.3596	28.8738	28.6167	-0.66795	-0.8884	0.22045	0.6294	0.540213	1.1651		16	16	16	57.9	57.9	57.9	24.423	161.46	1752100000	441	8	5	7	6	13	12	8	5	7	6	13	12	8	5	7	6	13	12	36.1	24.5	28.2
P32119	Peroxiredoxin-2	PRDX2	29.2571	29.1349	29.196	28.5884	29.6063	29.0973	29.1313	28.0318	28.5815	0.098655	-0.5158	0.614455	1.07077	0.699405	1.53098		20	19	19	66.7	61.1	61.1	21.892	153.98	1520600000	420	12	7	6	8	19	15	11	6	5	7	18	14	11	6	5	7	18	14	51.5	24.7	24.7
P21266	Glutathione S-transferase Mu 3	GSTM3	29.2511	29.4009	29.326	29.0033	29.2698	29.1366	28.8815	28.7072	28.7943	0.189475	-0.34221	0.531685	1.14035	0.788832	1.44562		24	24	23	76.4	76.4	76.4	26.559	323.31	2812900000	552	18	15	17	15	20	19	18	15	17	15	20	19	17	14	16	14	19	18	61.8	59.6	67.1
P05787;P08670;P14136;P41219;P17661	Keratin, type II cytoskeletal 8	KRT8	29.3225	29.4084	29.3655	31.0356	30.5455	30.7906	28.179	28.2939	28.2365	-1.42509	-2.5541	1.129	0.372395	0.17027	2.18708	+	50	42	36	72.7	67.7	60.2	53.704	323.31	8188100000	1596	32	38	39	37	33	38	28	33	33	33	27	34	25	28	28	28	24	30	50.1	59	56.7
P00558;P07205	Phosphoglycerate kinase 1	PGK1	29.5878	29.2755	29.4317	28.7478	28.7996	28.7737	28.4909	27.9899	28.2404	0.657995	-0.53328	1.19127	1.57789	0.690982	2.28354		38	38	38	82.3	82.3	82.3	44.614	323.31	5344300000	1028	31	27	29	30	24	25	31	27	29	30	24	25	31	27	29	30	24	25	75.1	69.8	68.6
P02768	Serum albumin	ALB	30.3637	31.09	30.7268	30.5502	30.3505	30.4504	28.4953	28.5939	28.5446	0.276485	-1.90577	2.18225	1.21124	0.266875	4.53861		25	25	25	34.6	34.6	34.6	69.366	128.19	12291000000	879	13	13	11	10	13	15	13	13	11	10	13	15	13	13	11	10	13	15	21.8	18.6	16.9
Q06830	Peroxiredoxin-1	PRDX1	30.8064	31.2615	31.034	30.807	31.0221	30.9145	32.1928	31.8544	32.0236	0.11942	1.10909	-0.989665	1.0863	2.15709	0.503595		30	30	25	80.4	80.4	80.4	22.11	220.88	7911700000	1682	21	16	14	15	24	26	21	16	14	15	24	26	16	12	10	12	20	22	64.3	63.3	58.8
Q05639	Elongation factor 1-alpha 2	EEF1A2	30.5108	29.8998	30.2053	31.2917	30.4574	30.8745	31.5705	31.6521	31.6113	-0.669245	0.736745	-1.40599	0.628836	1.66641	0.377359		35	35	21	72.4	72.4	47.5	50.47	306.26	15710000000	1490	22	16	12	16	25	21	22	16	12	16	25	21	13	8	5	8	13	11	46.9	34.8	24.2
P60709	Actin, cytoplasmic 1;Actin, cytoplasmic 1, N-terminally processed	ACTB	32.7455	32.9258	32.8356	32.164	32.588	32.376	32.0513	31.4364	31.7438	0.45967	-0.63212	1.09179	1.37523	0.645228	2.13138		28	28	1	75.2	75.2	4.5	41.736	323.31	55890000000	4560	24	22	21	21	20	24	24	22	21	21	20	24	1	0	1	0	0	0	72	68	62.9
P49327	Fatty acid synthase;[Acyl-carrier-protein] S-acetyltransferase;[Acyl-carrier-protein] S-malonyltransferase;3-oxoacyl-[acyl-carrier-protein] synthase;3-oxoacyl-[acyl-carrier-protein] reductase;3-hydroxyacyl-[acyl-carrier-protein] dehydratase;Enoyl-[acyl-carrier-protein] reductase;Oleoyl-[acyl-carrier-protein] hydrolase	FASN	30.8415	30.8906	30.8661	31.2522	30.8093	31.0308	30.8059	31.0146	30.9102	-0.16467	-0.120535	-0.044135	0.892133	0.919846	0.969871		148	148	148	69	69	69	273.42	323.31	16697000000	5572	97	85	76	82	138	129	97	85	76	82	138	129	97	85	76	82	138	129	48.7	40.3	35.9
P35908;P12036	Keratin, type II cytoskeletal 2 epidermal	KRT2	31.7887	31.0041	31.3964	31.5347	29.8764	30.7056	30.2127	30.098	30.1553	0.69083	-0.550215	1.24104	1.61421	0.682918	2.3637		68	63	48	89.2	87.3	75.6	65.432	323.31	11692000000	5026	47	35	39	32	52	46	44	31	35	28	50	44	35	24	25	23	38	34	67.4	55.1	57.1
P35527	Keratin, type I cytoskeletal 9	KRT9	31.7735	30.9308	31.3521	31.9209	31.6255	31.7732	31.3889	31.2875	31.3382	-0.42107	-0.435005	0.013935	0.74687	0.739691	1.00971		52	52	51	75.6	75.6	75.6	62.064	323.31	18091000000	6049	33	25	25	23	49	39	33	25	25	23	49	39	32	24	24	22	48	38	58.9	51.5	52.5
P14618;P30613	Pyruvate kinase PKM	PKM	31.6563	30.4434	31.0499	30.5199	30.6385	30.5792	32.1559	31.7958	31.9759	0.470675	1.39664	-0.92597	1.38576	2.63289	0.526327		53	53	53	75.9	75.9	75.9	57.936	323.31	21195000000	3241	46	32	32	33	48	44	46	32	32	33	48	44	46	32	32	33	48	44	72.3	64.2	63.5
P13645;Q2M2I5;Q7Z3Y9	Keratin, type I cytoskeletal 10	KRT10	32.5787	31.7582	32.1685	32.6687	31.3726	32.0206	31.3802	31.6489	31.5145	0.147815	-0.506145	0.65396	1.10789	0.704101	1.57348		47	46	37	65.8	65.8	60.8	58.826	323.31	25337000000	4826	35	29	30	25	42	39	34	28	29	24	41	38	26	21	21	18	34	31	58.7	49.8	46.9
P11413	Glucose-6-phosphate 1-dehydrogenase	G6PD	32.081	31.8622	31.9716	30.9633	31.4193	31.1913	29.4591	32.4133	30.9362	0.78031	-0.25506	1.03537	1.7175	0.837952	2.04964		54	54	54	89.3	89.3	89.3	59.256	323.31	27389000000	3226	45	36	37	36	34	49	45	36	37	36	34	49	45	36	37	36	34	49	86.6	70.1	68.3
P07900;Q14568;Q58FG1	Heat shock protein HSP 90-alpha	HSP90AA1	31.2192	30.9365	31.0779	31.2772	31.1089	31.1931	31.7153	31.6648	31.69	-0.1152	0.49699	-0.61219	0.923254	1.41127	0.654203		73	73	49	71.6	71.6	53.7	84.659	323.31	27116000000	3253	45	43	40	39	65	60	45	43	40	39	65	60	26	22	23	19	42	39	60.2	51.4	51.1
P06733	Alpha-enolase	ENO1	31.1412	30.0335	30.5874	30.0575	30.0596	30.0585	30.8259	30.7973	30.8116	0.52884	0.753085	-0.224245	1.44277	1.68539	0.856043		41	41	37	73.3	73.3	64.7	47.168	323.31	13678000000	1918	33	27	29	25	33	33	33	27	29	25	33	33	31	26	28	24	29	30	66.6	57.8	61.8
P04406	Glyceraldehyde-3-phosphate dehydrogenase	GAPDH	30.8442	30.409	30.6266	30.3916	31.1725	30.782	30.7998	30.9732	30.8865	-0.155455	0.104455	-0.25991	0.897849	1.07509	0.83514		27	27	26	83.9	83.9	81.8	36.053	323.31	12757000000	2260	21	14	18	16	25	20	21	14	18	16	25	20	20	13	17	15	24	19	63.6	44.8	48.4
P04075	Fructose-bisphosphate aldolase A	ALDOA	30.6971	30.794	30.7456	30.561	30.3098	30.4354	31.4472	30.5439	30.9956	0.310185	0.56016	-0.249975	1.23987	1.47443	0.840911		39	39	34	92.3	92.3	80.5	39.42	323.31	11216000000	1819	24	27	25	26	29	30	24	27	25	26	29	30	21	23	22	23	27	28	67.9	65.9	61.5
P04264	Keratin, type II cytoskeletal 1	KRT1	32.8279	32.6326	32.7302	33.4188	32.2457	32.8323	32.528	32.735	32.6315	-0.102025	-0.200775	0.09875	0.931724	0.870083	1.07085		68	68	60	73.4	73.4	72.2	66.038	323.31	41800000000	7981	45	38	44	33	53	50	45	38	44	33	53	50	39	31	37	27	48	46	60.4	49.1	53.1
P02765	Alpha-2-HS-glycoprotein;Alpha-2-HS-glycoprotein chain A;Alpha-2-HS-glycoprotein chain B	AHSG	27.783	28.2619	28.0225	27.8035	27.8394	27.8214	25.1316	19.4576	22.2946	0.20103	-5.52686	5.72789	1.14952	0.0216896	52.9987		4	4	4	7.1	7.1	7.1	39.324	67.182	1602300000	248	3	3	3	3	4	1	3	3	3	3	4	1	3	3	3	3	4	1	5.4	5.4	5.4
P42704;Q9NP80	Leucine-rich PPR motif-containing protein, mitochondrial	LRPPRC	26.1824	26.2909	26.2366	27.7523	27.4062	27.5793	26.4242	20.6748	23.5495	-1.34263	-4.02978	2.68714	0.3943	0.0612233	6.44035	+	81	81	81	62.8	62.8	62.8	157.9	323.31	934610000	728	42	33	48	45	66	7	42	33	48	45	66	7	42	33	48	45	66	7	31.1	23	32
P08758	Annexin A5	ANXA5	26.8957	27.9079	27.4018	26.1513	27.2357	26.6935	27.1226	22.5429	24.8327	0.70835	-1.86074	2.56909	1.63393	0.275335	5.93435		22	22	22	62.5	62.5	62.5	35.936	205.51	795290000	202	18	12	9	14	18	5	18	12	9	14	18	5	18	12	9	14	18	5	57.5	36.9	24.7
Q14914	Prostaglandin reductase 1	PTGR1	26.6806	25.7177	26.1991	22.0276	22.5462	22.2869	27.8389	27.8809	27.8599	3.91226	5.57306	-1.6608	15.056	47.6058	0.316264	+	22	22	22	78.7	78.7	78.7	35.869	323.31	578000000	368	14	17	5	5	19	14	14	17	5	5	19	14	14	17	5	5	19	14	45	59	13.4
P10599	Thioredoxin	TXN	25.3823	26.6	25.9912	22.5628	25.8816	24.2222	26.5231	27.0757	26.7994	1.76897	2.57723	-0.808255	3.40812	5.96793	0.571072		9	9	9	66.7	66.7	66.7	11.737	67.891	122500000	102	4	5	3	3	7	5	4	5	3	3	7	5	4	5	3	3	7	5	31.4	31.4	29.5
P63241;Q6IS14;Q9GZV4	Eukaryotic translation initiation factor 5A-1;Eukaryotic translation initiation factor 5A-1-like;Eukaryotic translation initiation factor 5A-2	EIF5A;EIF5AL1;EIF5A2	25.6915	25.4222	25.5568	18.6577	25.0087	21.8332	26.6328	25.9803	26.3066	3.72363	4.47337	-0.74974	13.2107	22.2136	0.594711		15	15	15	72.1	72.1	72.1	16.832	88.099	126660000	104	7	3	1	4	13	11	7	3	1	4	13	11	7	3	1	4	13	11	23.4	21.4	5.2
P62888	60S ribosomal protein L30	RPL30	24.3239	24.8958	24.6099	24.2721	25.0735	24.6728	26.9608	26.9841	26.9725	-0.06293	2.29968	-2.36261	0.957318	4.92349	0.194439		7	7	7	59.1	59.1	59.1	12.784	85.557	128920000	157	4	5	5	6	6	6	4	5	5	6	6	6	4	5	5	6	6	6	40.9	41.7	41.7
P62854;Q5JNZ5	40S ribosomal protein S26;Putative 40S ribosomal protein S26-like 1	RPS26;RPS26P11	24.6068	24.8089	24.7078	23.5995	25.3676	24.4835	26.6638	27.2471	26.9555	0.224335	2.47195	-2.24762	1.16824	5.54793	0.210572		4	4	4	44.3	44.3	44.3	13.015	21.639	119980000	90	2	2	2	2	4	4	2	2	2	2	4	4	2	2	2	2	4	4	20.9	20.9	20.9
P61353	60S ribosomal protein L27	RPL27	25.006	25.0142	25.0101	24.7405	25.1364	24.9384	26.6653	26.6806	26.673	0.07167	1.73453	-1.66286	1.05093	3.32771	0.315812		7	7	7	47.1	47.1	47.1	15.798	24.828	156240000	96	3	3	3	3	7	6	3	3	3	3	7	6	3	3	3	3	7	6	20.6	16.2	20.6
P62241	40S ribosomal protein S8	RPS8	24.9317	24.4495	24.6906	25.0458	24.3167	24.6812	27.4645	27.3604	27.4124	0.009375	2.73118	-2.72181	1.00652	6.64001	0.151584		14	14	14	58.7	58.7	58.7	24.205	323.31	273410000	329	9	7	8	7	12	10	9	7	8	7	12	10	9	7	8	7	12	10	49.5	39.9	43.3
P60866	40S ribosomal protein S20	RPS20	25.7278	24.6489	25.1884	25.5872	23.8912	24.7392	26.1795	26.6558	26.4176	0.44913	1.6784	-1.22928	1.36522	3.20074	0.426532		4	4	4	28.6	28.6	28.6	13.373	20.428	80325000	56	4	2	3	4	3	4	4	2	3	4	3	4	4	2	3	4	3	4	28.6	15.1	18.5
P17931	Galectin-3	LGALS3	25.7701	24.7138	25.2419	25.3462	23.7654	24.5558	25.8532	26.1671	26.0102	0.68614	1.45439	-0.76825	1.60897	2.74041	0.587129		8	8	8	38	38	38	26.152	39.87	231750000	110	6	4	6	5	8	6	6	4	6	5	8	6	6	4	6	5	8	6	25.2	15.2	25.2
P25787	Proteasome subunit alpha type-2	PSMA2	25.9627	25.9121	25.9374	24.474	23.8786	24.1763	25.4322	26.5257	25.9789	1.76113	1.80265	-0.04152	3.38962	3.48859	0.971631	+	14	14	14	70.1	70.1	70.1	25.898	149.37	124920000	89	4	3	6	4	12	9	4	3	6	4	12	9	4	3	6	4	12	9	19.7	13.7	35
P84098	60S ribosomal protein L19	RPL19	25.2881	24.7867	25.0374	26.6301	25.1302	25.8801	26.477	25.5623	26.0197	-0.842735	0.139535	-0.98227	0.557586	1.10155	0.506183		5	5	5	18.9	18.9	18.9	23.466	62.327	162630000	111	2	2	3	2	5	3	2	2	3	2	5	3	2	2	3	2	5	3	13.3	13.3	13.8
Q08211	ATP-dependent RNA helicase A	DHX9	25.1036	24.7201	24.9118	26.3157	25.9121	26.1139	26.7487	23.9875	25.3681	-1.20209	-0.74586	-0.45623	0.434645	0.596312	0.728888	+	58	58	58	52.4	52.4	52.4	140.96	323.31	396660000	523	19	15	25	25	55	22	19	15	25	25	55	22	19	15	25	25	55	22	15.2	12.2	20
Q99497	Protein deglycase DJ-1	PARK7	26.1568	24.8737	25.5152	26.1434	26.1589	26.1511	26.8243	26.2918	26.5581	-0.63588	0.40695	-1.04283	0.643548	1.32588	0.485374		17	17	17	68.3	68.3	68.3	19.891	90.362	198270000	199	8	5	9	9	14	13	8	5	9	9	14	13	8	5	9	9	14	13	43.9	28.6	51.3
P62851	40S ribosomal protein S25	RPS25	26.2429	25.3087	25.7758	26.11	25.8043	25.9571	26.8482	26.3575	26.6028	-0.18134	0.64571	-0.82705	0.881884	1.56451	0.563681		5	5	5	35.2	35.2	35.2	13.742	45.537	164660000	125	4	4	3	4	4	4	4	4	3	4	4	4	4	4	3	4	4	4	24	33.6	26.4
P62424	60S ribosomal protein L7a	RPL7A	25.3767	24.8648	25.1207	25.7079	26.2069	25.9574	26.5909	26.8353	26.7131	-0.8367	0.75571	-1.59241	0.559923	1.68846	0.331617		15	15	15	50.4	50.4	50.4	29.995	134.88	230650000	254	8	6	9	7	10	13	8	6	9	7	10	13	8	6	9	7	10	13	31.6	22.9	32
P62263	40S ribosomal protein S14	RPS14	25.9078	24.6081	25.2579	25.8377	25.9508	25.8942	27.0152	26.0388	26.527	-0.6363	0.632745	-1.26905	0.643361	1.55051	0.414934		11	11	11	70.2	70.2	70.2	16.273	57.717	124350000	151	6	2	4	5	11	8	6	2	4	5	11	8	6	2	4	5	11	8	32.5	15.9	18.5
P60660;P14649	Myosin light polypeptide 6	MYL6	26.0824	24.5659	25.3242	25.9142	25.7493	25.8317	27.3573	27.0468	27.202	-0.507565	1.37031	-1.87787	0.703409	2.58525	0.272085		7	7	7	47.7	47.7	47.7	16.93	105.54	139690000	158	5	3	2	4	7	7	5	3	2	4	7	7	5	3	2	4	7	7	31.1	21.2	15.9
P61313	60S ribosomal protein L15	RPL15	25.416	25.1776	25.2968	26.0085	26.1117	26.0601	26.483	26.252	26.3675	-0.763375	0.307355	-1.07073	0.589117	1.23744	0.476078	+	8	8	8	38.7	38.7	38.7	24.146	47.457	176070000	136	4	4	4	4	7	7	4	4	4	4	7	7	4	4	4	4	7	7	22.5	18.1	18.1
Q99832	T-complex protein 1 subunit eta	CCT7	25.3747	24.9203	25.1475	26.6062	26.0079	26.3071	26.2369	25.7262	25.9815	-1.15953	-0.325535	-0.833995	0.447658	0.798002	0.560974		33	33	33	71.8	71.8	71.8	59.366	323.31	509560000	458	20	15	17	13	23	25	20	15	17	13	23	25	20	15	17	13	23	25	49.4	30.4	32.6
P78371	T-complex protein 1 subunit beta	CCT2	26.0376	24.6059	25.3217	26.5283	25.9006	26.2145	25.14	26.6428	25.8914	-0.892735	-0.323075	-0.56966	0.538592	0.799364	0.673776		38	38	38	76.4	76.4	76.4	57.488	323.31	405160000	360	16	10	17	13	26	28	16	10	17	13	26	28	16	10	17	13	26	28	33.8	23	36.6
P62280	40S ribosomal protein S11	RPS11	25.8089	25.0846	25.4468	25.7541	25.7196	25.7369	25.9822	26.1705	26.0764	-0.290095	0.3395	-0.629595	0.817848	1.26532	0.646358		9	9	9	51.3	51.3	51.3	18.431	72.658	143720000	119	6	4	4	4	8	6	6	4	4	4	8	6	6	4	4	4	8	6	32.9	23.4	23.4
P49411	Elongation factor Tu, mitochondrial	TUFM	25.3335	25.0531	25.1933	26.2234	26.3182	26.2708	26.2552	26.0964	26.1758	-1.0775	-0.09504	-0.982455	0.473851	0.936246	0.506118	+	24	24	24	56.9	56.9	56.9	49.541	239.02	485670000	266	16	7	12	14	15	15	16	7	12	14	15	15	16	7	12	14	15	15	42	20.6	32.1
P49368	T-complex protein 1 subunit gamma	CCT3	25.2781	24.658	24.968	25.5075	25.8322	25.6698	26.212	26.4115	26.3117	-0.7018	0.64189	-1.34369	0.614805	1.56037	0.394012		31	31	31	58.9	58.9	58.9	60.533	258.39	359010000	387	20	11	17	17	22	19	20	11	17	17	22	19	20	11	17	17	22	19	46.6	22.6	32.7
P49207	60S ribosomal protein L34	RPL34	25.5741	24.8424	25.2083	25.5859	25.6459	25.6159	26.044	25.9648	26.0044	-0.407565	0.38853	-0.796095	0.753895	1.30906	0.575906		6	6	6	32.5	32.5	32.5	13.293	18.947	123760000	85	2	3	4	5	3	2	2	3	4	5	3	2	2	3	4	5	3	2	12.8	20.5	28.2
P39019	40S ribosomal protein S19	RPS19	25.7323	23.8778	24.8051	26.2029	25.8847	26.0438	25.5033	26.1721	25.8377	-1.23874	-0.20611	-1.03263	0.423743	0.866871	0.488818		11	11	11	54.5	54.5	54.5	16.06	34.51	81465000	105	3	3	5	5	9	6	3	3	5	5	9	6	3	3	5	5	9	6	18.6	19.3	32.4
P17987	T-complex protein 1 subunit alpha	TCP1	25.3709	24.8788	25.1249	25.9552	25.8885	25.9218	26.3859	26.0156	26.2007	-0.79695	0.278915	-1.07587	0.575565	1.21328	0.474387		28	28	28	61.3	61.3	61.3	60.343	323.31	442830000	292	19	10	15	12	22	23	19	10	15	12	22	23	19	10	15	12	22	23	38.3	18.3	26.6
P05388;Q8NHW5	60S acidic ribosomal protein P0;60S acidic ribosomal protein P0-like	RPLP0;RPLP0P6	25.8306	24.797	25.3138	25.9119	26.437	26.1745	25.8074	25.7651	25.7862	-0.86065	-0.388235	-0.472415	0.550704	0.764064	0.720757		14	14	14	50.8	50.8	50.8	34.273	253.65	342080000	234	6	7	6	8	12	12	6	7	6	8	12	12	6	7	6	8	12	12	24	33.8	24
P12268	Inosine-5-monophosphate dehydrogenase 2	IMPDH2	26.5089	25.2868	25.8978	26.4785	26.4438	26.4611	26.0116	25.6655	25.8386	-0.56333	-0.62255	0.05922	0.676738	0.649522	1.0419		25	25	23	55.1	55.1	51.8	55.804	187.06	637810000	281	21	12	17	17	16	18	21	12	17	17	16	18	20	11	15	16	15	17	48.4	26.1	35.2
P45974	Ubiquitin carboxyl-terminal hydrolase 5	USP5	26.3971	26.1865	26.2918	25.6046	26.0263	25.8154	25.4054	24.9266	25.166	0.476335	-0.649465	1.1258	1.3912	0.637517	2.18223		32	32	30	46.2	46.2	44.9	95.785	323.31	582840000	422	21	13	14	13	27	26	21	13	14	13	27	26	20	13	14	13	25	24	27.6	19.2	19.2
P35080	Profilin-2	PFN2	26.7366	26.367	26.5518	25.7087	26.0196	25.8641	25.8206	25.1741	25.4973	0.6877	-0.36682	1.05452	1.61071	0.77549	2.07703		6	6	6	37.9	37.9	37.9	15.046	98.736	110650000	89	5	5	3	3	5	4	5	5	3	3	5	4	5	5	3	3	5	4	36.4	36.4	21.4
O75828	Carbonyl reductase [NADPH] 3	CBR3	27.2373	27.1322	27.1847	24.7853	25.3029	25.0441	25.5652	25.6311	25.5981	2.14062	0.55402	1.5866	4.40953	1.46817	3.00342	+	19	19	17	75.1	75.1	64.6	30.85	276.31	539460000	206	15	11	7	9	16	13	15	11	7	9	16	13	13	9	5	7	14	11	70.8	43.7	28.5
P27797	Calreticulin	CALR	27.8709	26.1303	27.0006	26.2915	26.5452	26.4183	25.2239	26.1385	25.6812	0.58224	-0.737125	1.31937	1.49717	0.599934	2.49556		24	24	24	69.3	69.3	69.3	48.141	323.31	995800000	369	15	12	15	14	13	11	15	12	15	14	13	11	15	12	15	14	13	11	51.3	34.3	37.6
Q96DG6	Carboxymethylenebutenolidase homolog	CMBL	26.044	26.8731	26.4586	25.4756	25.8455	25.6605	26.5061	25.939	26.2225	0.79805	0.56201	0.23604	1.73875	1.47632	1.17776		19	19	19	52.7	52.7	52.7	28.048	99.434	347200000	143	10	6	6	7	13	16	10	6	6	7	13	16	10	6	6	7	13	16	29.8	23.7	23.7
Q15181	Inorganic pyrophosphatase	PPA1	25.5521	25.6558	25.604	25.4337	26.4587	25.9462	25.7514	25.8429	25.7971	-0.342235	-0.149085	-0.19315	0.788818	0.901822	0.874694		24	24	24	79.2	79.2	79.2	32.66	282.05	407360000	281	15	9	10	13	19	18	15	9	10	13	19	18	15	9	10	13	19	18	63.7	36.7	39.4
Q13200	26S proteasome non-ATPase regulatory subunit 2	PSMD2	25.9439	26.4141	26.179	25.5469	25.9323	25.7396	25.5584	25.8992	25.7288	0.43943	-0.0108	0.45023	1.35607	0.992542	1.36626		45	45	45	61.3	61.3	61.3	100.2	323.31	632600000	348	28	22	17	20	35	31	28	22	17	20	35	31	28	22	17	20	35	31	34.8	25.9	21.5
P25788	Proteasome subunit alpha type-3	PSMA3	26.55	26.741	26.6455	25.9149	26.2834	26.0991	25.5941	25.8637	25.7289	0.546345	-0.370215	0.91656	1.46038	0.773667	1.88761		11	11	11	41.2	41.2	41.2	28.433	60.502	468150000	128	9	4	7	9	8	8	9	4	7	9	8	8	9	4	7	9	8	8	36.9	15.7	25.9
P33176;O60282;Q12840	Kinesin-1 heavy chain	KIF5B	26.295	25.9926	26.1438	25.9494	26.0083	25.9788	25.1861	25.9634	25.5748	0.16496	-0.404065	0.569025	1.12113	0.755726	1.48352		58	58	58	67.1	67.1	67.1	109.68	323.31	573000000	518	34	28	32	28	45	40	34	28	32	28	45	40	34	28	32	28	45	40	40.4	33.3	39.1
Q16531	DNA damage-binding protein 1	DDB1	26.0589	26.4998	26.2794	26.4542	26.5358	26.495	25.8469	25.4555	25.6512	-0.21564	-0.843765	0.628125	0.861164	0.557188	1.54556		50	50	50	49.6	49.6	49.6	126.97	236.11	539010000	354	18	24	26	25	41	28	18	24	26	25	41	28	18	24	26	25	41	28	16.9	21.2	25.8
Q14103	Heterogeneous nuclear ribonucleoprotein D0	HNRNPD	25.8955	25.6538	25.7746	26.5318	26.186	26.3589	25.646	25.8025	25.7242	-0.584275	-0.634635	0.05036	0.666984	0.644104	1.03552		15	15	14	39.2	39.2	36.9	38.434	94.451	562200000	268	9	7	10	10	10	10	9	7	10	10	10	10	8	6	9	9	9	9	27	23.4	26.2
P62917	60S ribosomal protein L8	RPL8	25.9202	26.1158	26.018	26.3779	26.7628	26.5703	25.938	25.4245	25.6813	-0.55232	-0.88906	0.33674	0.681923	0.539966	1.2629		9	9	9	38.1	38.1	38.1	28.024	46.892	301610000	162	4	3	4	4	8	6	4	3	4	4	8	6	4	3	4	4	8	6	13.6	13.2	13.6
P27708;P31327	CAD protein;Glutamine-dependent carbamoyl-phosphate synthase;Aspartate carbamoyltransferase;Dihydroorotase	CAD	25.521	26.2952	25.9081	26.0951	26.3871	26.2411	25.3322	25.5487	25.4404	-0.332995	-0.80067	0.467675	0.793887	0.574083	1.38288		77	77	77	50.8	50.8	50.8	242.98	323.31	471730000	528	35	30	33	32	63	51	35	30	33	32	63	51	35	30	33	32	63	51	19.5	17.1	17.3
P00505	Aspartate aminotransferase, mitochondrial	GOT2	25.4398	26.4041	25.922	26.0775	26.5203	26.2989	25.0185	25.4596	25.2391	-0.376965	-1.05985	0.682885	0.770056	0.479682	1.60535		23	23	23	58.4	58.4	58.4	47.517	290.74	567030000	214	14	14	18	17	12	14	14	14	18	17	12	14	14	14	18	17	12	14	31.9	30.9	40.5
P20618	Proteasome subunit beta type-1	PSMB1	25.0427	26.2306	25.6366	26.4823	26.4123	26.4473	25.2138	25.4538	25.3338	-0.810675	-1.11353	0.302855	0.570115	0.462162	1.23358		14	14	14	61.4	61.4	61.4	26.489	152.07	158710000	113	6	3	4	4	12	14	6	3	4	4	12	14	6	3	4	4	12	14	32	13.3	21.6
Q92598	Heat shock protein 105 kDa	HSPH1	26.4117	26.0408	26.2262	25.8085	25.4833	25.6459	26.2258	26.8818	26.5538	0.58033	0.90788	-0.32755	1.49519	1.87629	0.796889		50	47	46	67.6	64	62.4	96.864	323.31	773550000	443	36	25	25	21	39	33	34	23	23	19	38	32	33	22	22	18	37	31	49.8	32.1	31.4
P81605	Dermcidin;Survival-promoting peptide;DCD-1	DCD	26.3756	25.9189	26.1473	26.2193	25.7926	26.006	26.8551	26.0814	26.4682	0.14129	0.46228	-0.32099	1.10289	1.37772	0.80052		11	11	11	53.6	53.6	53.6	11.284	47.978	325040000	306	4	3	3	2	9	6	4	3	3	2	9	6	4	3	3	2	9	6	35.5	22.7	22.7
P62701;Q8TD47;P22090	40S ribosomal protein S4, X isoform	RPS4X	26.329	26.2264	26.2777	26.4521	25.8494	26.1508	26.1161	26.3355	26.2258	0.12692	0.075015	0.051905	1.09196	1.05337	1.03663		21	21	21	60.5	60.5	60.5	29.597	268.67	441150000	216	10	8	14	9	15	19	10	8	14	9	15	19	10	8	14	9	15	19	31.2	29.7	50.6
P48643	T-complex protein 1 subunit epsilon	CCT5	25.4235	26.2482	25.8358	26.1379	25.8938	26.0158	26.5222	26.3282	26.4252	-0.18	0.40935	-0.58935	0.882703	1.32809	0.664642		33	33	33	58.6	58.6	58.6	59.67	280.22	428220000	318	21	8	17	13	27	16	21	8	17	13	27	16	21	8	17	13	27	16	45.3	13.1	30.5
P28066	Proteasome subunit alpha type-5	PSMA5	25.546	26.0936	25.8198	25.8745	25.7492	25.8119	25.8929	26.0589	25.9759	0.007935	0.16402	-0.156085	1.00552	1.1204	0.897457		12	12	12	66.4	66.4	66.4	26.411	186.12	377970000	141	7	5	7	6	12	12	7	5	7	6	12	12	7	5	7	6	12	12	34.4	21.6	34.4
P07814	Bifunctional glutamate/proline--tRNA ligase;Glutamate--tRNA ligase;Proline--tRNA ligase	EPRS	25.8783	26.0685	25.9734	26.1033	25.5779	25.8406	26.4761	26.8264	26.6513	0.13283	0.81068	-0.67785	1.09644	1.75404	0.625096		87	87	86	60	60	60	170.59	323.31	602660000	725	40	27	43	30	71	62	40	27	43	30	71	62	39	26	42	29	71	62	32.1	20.8	33
P17174	Aspartate aminotransferase, cytoplasmic	GOT1	25.3107	26.1463	25.7285	25.8219	25.6142	25.718	26.3612	26.2581	26.3097	0.010465	0.59161	-0.581145	1.00728	1.50693	0.668433		23	23	23	70.2	70.2	70.2	46.247	250.5	493590000	208	14	13	13	15	18	16	14	13	13	15	18	16	14	13	13	15	18	16	43.3	36.8	34.6
Q01813	ATP-dependent 6-phosphofructokinase, platelet type	PFKP	25.738	25.92	25.829	25.1253	25.4384	25.2819	26.5496	26.408	26.4788	0.547135	1.19695	-0.649815	1.46118	2.29254	0.637362		40	40	35	52.3	52.3	45.4	85.595	323.31	519490000	561	24	23	20	22	33	28	24	23	20	22	33	28	21	19	17	18	29	25	38	36.2	27
P62906	60S ribosomal protein L10a	RPL10A	25.4079	25.7415	25.5747	25.7366	25.2414	25.489	26.2792	26.1853	26.2322	0.085695	0.743275	-0.65758	1.0612	1.67397	0.633941		14	14	14	50.2	50.2	50.2	24.831	106.62	327460000	97	4	3	6	5	11	12	4	3	6	5	11	12	4	3	6	5	11	12	19.8	12.9	30.4
P54136	Arginine--tRNA ligase, cytoplasmic	RARS	25.687	26.1077	25.8973	25.3027	25.5162	25.4095	25.9036	25.7139	25.8088	0.48783	0.39927	0.08856	1.40233	1.31884	1.06331		43	43	43	66.2	66.2	66.2	75.378	323.31	460320000	373	28	24	22	21	30	28	28	24	22	21	30	28	28	24	22	21	30	28	50.6	42.6	39.8
A0A0A0MT01;P06396	Gelsolin	GSN	25.2408	25.5596	25.4002	25.4551	24.9606	25.2078	25.7376	25.8349	25.7862	0.192365	0.578425	-0.38606	1.14264	1.49322	0.765217		27	27	27	38.2	38.2	38.2	84.744	323.31	399620000	279	17	10	13	12	20	17	17	10	13	12	20	17	17	10	13	12	20	17	31.7	17.2	20.9
P30153	Serine/threonine-protein phosphatase 2A 65 kDa regulatory subunit A alpha isoform	PPP2R1A	25.7251	25.485	25.6051	25.2959	25.3962	25.346	26.2259	25.5749	25.9004	0.259005	0.55433	-0.295325	1.19665	1.46849	0.814889		28	28	22	57	57	43.5	65.308	286.12	428270000	294	22	14	14	16	21	19	22	14	14	16	21	19	19	13	13	14	15	16	47.9	27.3	29.4
P55884	Eukaryotic translation initiation factor 3 subunit B	EIF3B	26.111	25.5817	25.8464	25.0547	25.3432	25.199	25.8449	25.8305	25.8377	0.64739	0.6387	0.00869	1.56633	1.55693	1.00604		40	40	40	56.9	56.9	56.9	92.48	323.31	495910000	425	26	19	19	19	32	28	26	19	19	19	32	28	26	19	19	19	32	28	35.9	23.5	21.9
P51149	Ras-related protein Rab-7a	RAB7A	26.0911	25.5015	25.7963	25.1702	25.5833	25.3768	25.6038	26.3334	25.9686	0.41955	0.591835	-0.172285	1.33751	1.50716	0.887436		15	15	15	76.8	76.8	76.8	23.489	146.75	167400000	186	12	7	7	10	14	8	12	7	7	10	14	8	12	7	7	10	14	8	65.7	38.2	37.2
P00441	Superoxide dismutase [Cu-Zn]	SOD1	26.337	25.8166	26.0768	24.223	25.3235	24.7732	26.431	25.5528	25.9919	1.30359	1.21869	0.084905	2.46842	2.32734	1.06062		12	12	12	86.4	86.4	86.4	15.936	170.77	141830000	155	4	5	4	5	9	6	4	5	4	5	9	6	4	5	4	5	9	6	31.8	37	27.9
P30044	Peroxiredoxin-5, mitochondrial	PRDX5	25.8829	25.6106	25.7467	23.929	25.6003	24.7647	26.0791	26.6695	26.3743	0.982065	1.60965	-0.62758	1.97529	3.05177	0.647261		12	12	12	56.1	56.1	56.1	22.086	107	147520000	144	7	2	2	7	12	10	7	2	2	7	12	10	7	2	2	7	12	10	47.2	10.3	10.3
Q16881	Thioredoxin reductase 1, cytoplasmic	TXNRD1	27.156	26.3354	26.7457	25.3165	25.6181	25.4673	26.6235	25.9193	26.2714	1.27839	0.804125	0.474265	2.42568	1.74609	1.38921		32	32	31	61.8	61.8	59.5	70.905	323.31	733810000	295	20	17	12	14	25	20	20	17	12	14	25	20	19	16	11	13	24	19	43	30.7	22.5
P84085	ADP-ribosylation factor 5	ARF5	26.6729	25.799	26.2359	25.023	26.1864	25.6047	26.7813	26.035	26.4082	0.631225	0.803485	-0.17226	1.54888	1.74531	0.887451		13	13	7	65.6	65.6	35.6	20.529	226.41	218480000	198	6	5	3	4	12	10	6	5	3	4	12	10	4	3	2	3	6	4	37.8	30	20
P62244	40S ribosomal protein S15a	RPS15A	27.2406	25.8441	26.5423	24.6771	25.5759	25.1265	26.4005	26.1999	26.3002	1.41586	1.17373	0.242125	2.66818	2.25594	1.18273		10	10	5	66.2	66.2	30	14.839	36.16	124770000	132	6	5	5	6	10	7	6	5	5	6	10	7	2	1	1	2	5	3	40	32.3	32.3
P48163;Q16798	NADP-dependent malic enzyme	ME1	27.4343	27.5764	27.5053	24.9677	25.672	25.3199	26.8784	26.5359	26.7071	2.18544	1.38727	0.79817	4.54865	2.61583	1.73889	+	27	27	27	61.2	61.2	61.2	64.149	307.75	892690000	334	23	13	7	11	21	20	23	13	7	11	21	20	23	13	7	11	21	20	49.7	24.1	13.6
P37802;Q9UI15	Transgelin-2	TAGLN2	26.4604	25.5681	26.0143	25.7023	26.0118	25.8571	26.7528	25.8593	26.306	0.15719	0.448955	-0.291765	1.11511	1.36505	0.816902		16	16	16	74.9	74.9	74.9	22.391	246.28	196570000	284	11	6	6	9	14	13	11	6	6	9	14	13	11	6	6	9	14	13	51.3	29.6	32.7
P30043	Flavin reductase (NADPH)	BLVRB	27.3789	24.9824	26.1806	25.0308	25.1395	25.0851	26.7099	26.4589	26.5844	1.09552	1.49927	-0.403755	2.13689	2.827	0.755888		16	16	16	91.3	91.3	91.3	22.119	130.2	250800000	311	7	4	4	5	15	12	7	4	4	5	15	12	7	4	4	5	15	12	49	28.2	28.2
P30050	60S ribosomal protein L12	RPL12	26.4033	25.867	26.1352	25.1222	26.4577	25.79	26.4539	26.1954	26.3246	0.3452	0.53466	-0.18946	1.27033	1.4486	0.876934		8	8	8	63.6	63.6	63.6	17.818	185.97	208850000	168	5	4	4	5	7	6	5	4	4	5	7	6	5	4	4	5	7	6	45.5	33.9	33.9
P99999	Cytochrome c	CYCS	26.267	25.8494	26.0582	25.2343	25.0943	25.1643	25.2968	24.8471	25.0719	0.893885	-0.092365	0.98625	1.85817	0.937984	1.98103		6	6	6	41	41	41	11.749	35.502	77744000	97	5	4	4	4	5	5	5	4	4	4	5	5	5	4	4	4	5	5	39	28.6	23.8
P08195	4F2 cell-surface antigen heavy chain	SLC3A2	26.0611	26.1165	26.0888	24.4947	25.0825	24.7886	25.3071	25.5545	25.4308	1.30021	0.642235	0.657975	2.46265	1.56075	1.57787	+	25	25	25	42.4	42.4	42.4	67.993	323.31	488890000	312	20	17	14	16	20	19	20	17	14	16	20	19	20	17	14	16	20	19	34.9	31.9	24.8
O00231	26S proteasome non-ATPase regulatory subunit 11	PSMD11	25.7233	25.0682	25.3958	24.7266	25.0461	24.8864	25.1836	25.1853	25.1844	0.50938	0.298065	0.211315	1.42344	1.22949	1.15774		25	25	25	61.6	61.6	61.6	47.463	323.31	358990000	187	17	11	13	13	17	12	17	11	13	13	17	12	17	11	13	13	17	12	46.4	30.6	35.8
O95340	Bifunctional 3-phosphoadenosine 5-phosphosulfate synthase 2;Sulfate adenylyltransferase;Adenylyl-sulfate kinase	PAPSS2	26.3279	25.8978	26.1128	25.4018	24.8681	25.1349	25.2809	25.4146	25.3478	0.9779	0.21285	0.76505	1.9696	1.15898	1.69943		28	28	26	54.7	54.7	51.8	69.5	201.73	390970000	362	19	14	9	12	18	15	19	14	9	12	18	15	18	13	8	11	16	14	37.1	25.9	17.6
Q04760	Lactoylglutathione lyase	GLO1	26.0521	26.0908	26.0714	24.9105	25.859	25.3847	24.7444	24.8885	24.8165	0.68671	-0.56824	1.25495	1.60961	0.674439	2.38659		12	12	12	56	56	56	20.777	34.897	143260000	136	7	5	4	6	12	8	7	5	4	6	12	8	7	5	4	6	12	8	26.1	20.1	16.3
P12814;P35609;Q08043	Alpha-actinin-1	ACTN1	26.3088	26.0255	26.1671	25.2794	25.7427	25.5111	25.1321	24.7977	24.9649	0.65609	-0.546145	1.20224	1.57581	0.684848	2.30096		59	38	38	71.7	48.2	48.2	103.06	323.31	690220000	472	45	33	28	32	48	45	28	20	16	18	29	27	28	20	16	18	29	27	55.5	41.8	37.6
P49773	Histidine triad nucleotide-binding protein 1	HINT1	26.501	26.4521	26.4766	24.2254	25.46	24.8427	24.6034	25.0446	24.824	1.63383	-0.018765	1.65259	3.10336	0.987077	3.14399		8	8	8	84.1	84.1	84.1	13.802	15.724	83334000	73	5	4	2	4	6	6	5	4	2	4	6	6	5	4	2	4	6	6	29.4	23.8	12.7
Q96FW1	Ubiquitin thioesterase OTUB1	OTUB1	25.632	25.9125	25.7722	25.4526	26.0376	25.7451	25.0581	25.1978	25.1279	0.02715	-0.617165	0.644315	1.019	0.651951	1.563		16	16	16	67.5	67.5	67.5	31.284	299.85	328500000	182	10	7	4	7	11	9	10	7	4	7	11	9	10	7	4	7	11	9	36.2	36.9	17.7
Q8TCU6	Phosphatidylinositol 3,4,5-trisphosphate-dependent Rac exchanger 1 protein	PREX1	25.3989	25.7825	25.5907	25.5783	25.5173	25.5478	24.7491	25.475	25.1121	0.042905	-0.43571	0.478615	1.03019	0.73933	1.39341		71	71	71	50.4	50.4	50.4	186.2	323.31	359860000	561	31	22	27	27	59	49	31	22	27	27	59	49	31	22	27	27	59	49	25.6	17.4	20.8
Q13813	Spectrin alpha chain, non-erythrocytic 1	SPTAN1	25.2621	25.8055	25.5338	25.8395	25.4026	25.6211	25.0255	24.7345	24.88	-0.087255	-0.741045	0.65379	0.941312	0.598306	1.5733		118	118	118	57.6	57.6	57.6	284.54	323.31	341090000	604	57	44	51	42	82	72	57	44	51	42	82	72	57	44	51	42	82	72	26.5	20.5	23.1
Q08209;P16298;P48454	Serine/threonine-protein phosphatase 2B catalytic subunit alpha isoform;Serine/threonine-protein phosphatase 2B catalytic subunit beta isoform	PPP3CA;PPP3CB	25.3453	26.2406	25.793	25.3943	25.9231	25.6587	24.659	24.998	24.8285	0.134255	-0.830255	0.96451	1.09753	0.56243	1.9514		16	16	16	33	33	33	58.687	47.801	308070000	247	11	9	10	12	9	9	11	9	10	12	9	9	11	9	10	12	9	9	20.3	18	20.9
P60953;P17081;Q9H4E5	Cell division control protein 42 homolog	CDC42	25.143	26.2965	25.7198	26.5876	25.6428	26.1152	24.7195	25.595	25.1573	-0.39548	-0.957965	0.562485	0.760236	0.514783	1.47681		9	8	8	62.8	57.1	57.1	21.258	53.775	143670000	129	5	3	2	3	9	5	4	2	2	2	8	4	4	2	2	2	8	4	31.4	16.8	11
P49902	Cytosolic purine 5-nucleotidase	NT5C2	26.0224	26.0966	26.0595	25.7186	25.0297	25.3741	24.6798	24.9652	24.8225	0.685385	-0.55168	1.23707	1.60813	0.682225	2.35719		21	21	21	47.8	47.8	47.8	64.969	123.06	376860000	133	13	6	5	9	12	13	13	6	5	9	12	13	13	6	5	9	12	13	25.1	10.9	8.7
P14735	Insulin-degrading enzyme	IDE	25.5353	25.7145	25.6249	24.8912	25.4057	25.1485	24.432	25.1852	24.8086	0.476435	-0.33987	0.816305	1.3913	0.790113	1.76089		44	44	44	43.5	43.5	43.5	117.97	291.18	333320000	287	26	22	21	21	36	33	26	22	21	21	36	33	26	22	21	21	36	33	27.8	21.3	19.7
P09960	Leukotriene A-4 hydrolase	LTA4H	25.598	25.7576	25.6778	24.9968	25.5713	25.2841	24.7918	24.7756	24.7837	0.393735	-0.500365	0.8941	1.31379	0.706928	1.85845		34	34	34	59.7	59.7	59.7	69.284	323.31	412560000	287	22	19	15	17	21	26	22	19	15	17	21	26	22	19	15	17	21	26	41.6	41.4	29.1
P05455	Lupus La protein	SSB	25.7189	25.6174	25.6681	26.1988	25.72	25.9594	24.4029	25.2636	24.8332	-0.291295	-1.12621	0.83491	0.817168	0.458119	1.78375		32	32	32	60.5	60.5	60.5	46.836	229.65	440540000	239	15	12	14	17	12	21	15	12	14	17	12	21	15	12	14	17	12	21	33.3	28.7	28.7
P08779	Keratin, type I cytoskeletal 16	KRT16	23.8969	26.9906	25.4438	26.147	24.3335	25.2402	24.4788	24.8119	24.6453	0.20353	-0.59492	0.79845	1.15151	0.662081	1.73923		38	20	20	68.3	45.9	45.9	51.267	323.31	269020000	385	22	21	27	20	31	22	10	9	12	10	16	9	10	9	12	10	16	9	50.5	49.3	56.7
Q99714	3-hydroxyacyl-CoA dehydrogenase type-2	HSD17B10	25.775	24.9775	25.3762	25.1187	25.7038	25.4113	25.2698	24.9983	25.134	-0.035025	-0.27723	0.242205	0.976015	0.825174	1.1828		18	18	18	89.3	89.3	89.3	26.923	323.31	199830000	230	10	8	12	9	16	15	10	8	12	9	16	15	10	8	12	9	16	15	45.2	42.9	73.2
Q8WUM4	Programmed cell death 6-interacting protein	PDCD6IP	25.5275	24.7608	25.1441	25.651	25.3998	25.5254	25.2704	25.1859	25.2281	-0.38127	-0.297285	-0.083985	0.767761	0.813782	0.943448		44	44	44	60.4	60.4	60.4	96.022	323.31	334000000	320	25	17	22	17	39	34	25	17	22	17	39	34	25	17	22	17	39	34	33.9	22.9	26.2
Q7Z4W1	L-xylulose reductase	DCXR	25.7042	25.3644	25.5343	26.3015	25.9715	26.1365	25.1904	25.0301	25.1102	-0.60224	-1.02629	0.42405	0.65873	0.490971	1.34169		13	13	13	71.3	71.3	71.3	25.913	103.73	299180000	151	7	6	11	9	8	9	7	6	11	9	8	9	7	6	11	9	8	9	35.7	28.3	60.2
Q15149	Plectin	PLEC	25.3737	25.346	25.3598	25.7764	25.6833	25.7299	25.3445	25.3108	25.3277	-0.37001	-0.40219	0.03218	0.773777	0.756709	1.02256	+	167	167	161	41.3	41.3	39.3	531.78	323.31	350120000	757	66	47	61	59	113	97	66	47	61	59	113	97	65	46	60	58	107	91	15.7	11.2	14.4
Q14204	Cytoplasmic dynein 1 heavy chain 1	DYNC1H1	25.3478	25.6812	25.5145	24.8957	25.3701	25.1329	25.4623	24.9544	25.2083	0.38159	0.075425	0.306165	1.30278	1.05367	1.23642		169	169	169	43.7	43.7	43.7	532.4	323.31	348720000	658	71	65	42	51	114	102	71	65	42	51	114	102	71	65	42	51	114	102	17.3	14.8	9.8
Q06210	Glutamine--fructose-6-phosphate aminotransferase [isomerizing] 1	GFPT1	25.7289	25.1679	25.4484	26.0518	25.3217	25.6867	25.4816	24.7523	25.1169	-0.238315	-0.56976	0.331445	0.847735	0.673729	1.25827		38	38	31	61.5	61.5	51.5	78.806	323.31	434330000	361	27	20	19	18	29	27	27	20	19	18	29	27	23	17	16	16	24	21	47.5	36.8	30.8
P61158;Q9P1U1;Q9C0K3	Actin-related protein 3	ACTR3	25.5295	25.7215	25.6255	25.9704	25.3607	25.6656	25.3993	24.9239	25.1616	-0.04009	-0.503965	0.463875	0.972594	0.705166	1.37924		20	20	20	56.9	56.9	56.9	47.371	202.59	437970000	243	17	14	15	16	11	14	17	14	15	16	11	14	17	14	15	16	11	14	49	36.8	41.9
P52907	F-actin-capping protein subunit alpha-1	CAPZA1	25.2504	25.0967	25.1735	24.9768	25.5913	25.2841	25.7567	25.4646	25.6107	-0.11056	0.326565	-0.437125	0.926228	1.25402	0.738605		16	16	12	71.7	71.7	62.9	32.922	252.09	273250000	182	9	6	9	10	11	10	9	6	9	10	11	10	8	5	7	8	9	8	47.2	29	40.6
P47756	F-actin-capping protein subunit beta	CAPZB	25.3154	25.3736	25.3445	25.2022	25.4025	25.3024	25.3397	25.6525	25.4961	0.04214	0.193765	-0.151625	1.02964	1.14374	0.900236		18	18	18	61.4	61.4	61.4	31.35	222.45	261640000	180	11	6	10	10	13	13	11	6	10	10	13	13	11	6	10	10	13	13	35.7	24.5	43.3
P46779	60S ribosomal protein L28	RPL28	25.7855	25.4802	25.6328	25.0564	26.0603	25.5584	25.3331	24.8752	25.1041	0.07444	-0.454255	0.528695	1.05295	0.729887	1.44262		9	9	9	35.8	35.8	35.8	15.747	79.691	128930000	133	4	3	5	5	7	4	4	3	5	5	7	4	4	3	5	5	7	4	23.4	21.9	29.2
P41250	Glycine--tRNA ligase	GARS	24.9904	25.4067	25.1986	25.8165	25.2799	25.5482	25.6738	25.7432	25.7085	-0.3496	0.16028	-0.50988	0.784802	1.1175	0.702281		30	30	30	45.1	45.1	45.1	83.165	172.47	370840000	268	18	9	10	11	20	19	18	9	10	11	20	19	18	9	10	11	20	19	27.1	13.3	13.9
P35998	26S protease regulatory subunit 7	PSMC2	25.6419	25.6696	25.6558	25.7454	25.5641	25.6548	25.301	25.5782	25.4396	0.00099	-0.21517	0.21616	1.00069	0.861445	1.16164		32	32	32	72.3	72.3	72.3	48.633	233.83	398760000	270	23	12	18	19	20	22	23	12	18	19	20	22	23	12	18	19	20	22	54.5	30.9	41.1
P20340	Ras-related protein Rab-6A	RAB6A	25.7854	25.9599	25.8726	25.8517	25.9488	25.9003	25.6135	24.6629	25.1382	-0.02764	-0.76208	0.73444	0.981024	0.589646	1.66375		11	11	4	49	49	23.6	23.593	67.158	183540000	191	6	5	5	4	10	9	6	5	5	4	10	9	1	1	1	1	4	2	30.8	25	25
P13010	X-ray repair cross-complementing protein 5	XRCC5	25.385	25.3011	25.3431	25.4805	25.1819	25.3312	25.4197	25.4609	25.4403	0.01188	0.109115	-0.097235	1.00827	1.07857	0.934823		37	37	37	61.2	61.2	61.2	82.704	213.06	395820000	311	17	14	14	10	33	26	17	14	14	10	33	26	17	14	14	10	33	26	23.6	20.2	19.7
O60506	Heterogeneous nuclear ribonucleoprotein Q	SYNCRIP	25.5107	24.7654	25.138	25.669	25.7408	25.7049	25.5255	25.4122	25.4688	-0.56689	-0.23609	-0.3308	0.67507	0.849043	0.795095		30	30	25	41.4	41.4	33.7	69.602	323.31	389130000	311	20	9	14	13	21	19	20	9	14	13	21	19	15	5	9	8	16	14	36.6	16.2	22.6
P08134	Rho-related GTP-binding protein RhoC	RHOC	25.3117	25.6032	25.4575	25.5631	25.1457	25.3544	25.4166	24.4083	24.9124	0.103085	-0.44193	0.545015	1.07407	0.736149	1.45904		8	8	1	37.8	37.8	6.2	22.006	197.31	124050000	118	7	3	3	3	8	7	7	3	3	3	8	7	1	1	1	1	1	1	37.3	16.1	16.1
P54577	Tyrosine--tRNA ligase, cytoplasmic;Tyrosine--tRNA ligase, cytoplasmic, N-terminally processed	YARS	26.0294	25.5251	25.7773	25.87	25.424	25.647	25.7852	25.355	25.5701	0.13027	-0.07691	0.20718	1.0945	0.948086	1.15443		36	36	36	67.4	67.4	67.4	59.143	162.21	390200000	265	29	18	22	20	19	15	29	18	22	20	19	15	29	18	22	20	19	15	60.8	36.6	44.5
P52565	Rho GDP-dissociation inhibitor 1	ARHGDIA	26.1306	25.2023	25.6664	26.1402	25.5601	25.8502	25.4006	25.8968	25.6487	-0.183765	-0.201495	0.01773	0.880402	0.869649	1.01237		13	13	13	50	50	50	23.207	132.82	189000000	211	5	6	5	7	10	7	5	6	5	7	10	7	5	6	5	7	10	7	22.5	22.5	25.5
P39687;O95626;O43423	Acidic leucine-rich nuclear phosphoprotein 32 family member A	ANP32A	25.7538	25.091	25.4224	26.2469	25.1433	25.6951	25.5859	25.673	25.6294	-0.272745	-0.06567	-0.207075	0.827743	0.955501	0.866292		13	13	11	42.2	42.2	42.2	28.585	129.31	306530000	115	8	6	10	7	7	9	8	6	10	7	7	9	6	5	8	5	5	7	33.3	19.7	39.8
P35241;P26038	Radixin	RDX	26.5015	25.3024	25.9019	25.6868	25.2418	25.4643	26.1989	25.6722	25.9355	0.437615	0.471235	-0.03362	1.35436	1.3863	0.976966		41	41	31	59.7	59.7	45.6	68.563	323.31	577450000	296	26	21	15	12	29	26	26	21	15	12	29	26	17	15	8	8	21	18	40.8	31.9	24.9
P13489	Ribonuclease inhibitor	RNH1	25.9588	25.3876	25.6732	25.6946	25.2034	25.449	25.7717	26.0098	25.8907	0.22417	0.44171	-0.21754	1.16811	1.35821	0.860031		23	23	23	63.8	63.8	63.8	49.973	318.75	449820000	288	14	12	15	16	18	16	14	12	15	16	18	16	14	12	15	16	18	16	36.4	31.5	40.3
P09382	Galectin-1	LGALS1	26.3706	25.104	25.7373	26.0438	24.7028	25.3733	25.6942	25.5709	25.6326	0.363975	0.25927	0.104705	1.28697	1.19687	1.07527		6	6	6	51.1	51.1	51.1	14.716	80.94	82983000	88	5	4	2	5	6	5	5	4	2	5	6	5	5	4	2	5	6	5	39.3	30.4	13.3
P00492	Hypoxanthine-guanine phosphoribosyltransferase	HPRT1	25.8989	24.9745	25.4367	25.0191	24.8573	24.9382	25.7339	25.4996	25.6168	0.49852	0.67857	-0.18005	1.41276	1.60055	0.882672		14	14	14	78.9	78.9	78.9	24.579	141.49	195700000	146	7	4	8	8	10	14	7	4	8	8	10	14	7	4	8	8	10	14	37.6	22	45
P05198	Eukaryotic translation initiation factor 2 subunit 1	EIF2S1	26.0036	25.0588	25.5312	25.69	25.0401	25.365	25.2893	25.5664	25.4278	0.166175	0.0628	0.103375	1.12208	1.04449	1.07428		28	28	28	73	73	73	36.112	323.31	289210000	241	12	12	11	11	24	19	12	12	11	11	24	19	12	12	11	11	24	19	38.7	39.4	35.9
Q15393	Splicing factor 3B subunit 3	SF3B3	25.2715	26.1432	25.7074	25.6483	25.8892	25.7687	24.8179	23.8918	24.3548	-0.061355	-1.41389	1.35253	0.958364	0.3753	2.5536		44	44	44	43.1	43.1	43.1	135.58	323.31	312660000	370	22	27	25	24	37	24	22	27	25	24	37	24	22	27	25	24	37	24	21.2	24.8	22.9
Q15102	Platelet-activating factor acetylhydrolase IB subunit gamma	PAFAH1B3	25.1415	25.8661	25.5038	25.9957	25.4283	25.712	23.99	23.7842	23.8871	-0.20819	-1.82494	1.61675	0.865623	0.282253	3.06683		11	11	11	65.8	65.8	65.8	25.734	61.043	135220000	96	7	4	4	4	8	7	7	4	4	4	8	7	7	4	4	4	8	7	29	18.6	18.6
Q14847	LIM and SH3 domain protein 1	LASP1	26.1415	25.8549	25.9982	24.9618	26.2935	25.6276	24.9225	23.901	24.4117	0.37057	-1.21592	1.58649	1.29286	0.430497	3.00319		11	11	11	37.5	37.5	37.5	29.717	148.44	98495000	214	6	5	7	6	9	6	6	5	7	6	9	6	6	5	7	6	9	6	21.1	17.6	24.5
Q04917	14-3-3 protein eta	YWHAH	25.592	26.6188	26.1054	25.3844	26.6581	26.0213	24.6879	24.3971	24.5425	0.084125	-1.47875	1.56288	1.06004	0.358798	2.95443		21	17	17	65	58.5	58.5	28.218	323.31	350210000	134	13	11	16	12	14	15	10	8	13	9	11	12	10	8	13	9	11	12	47.6	43.5	57.7
P62753	40S ribosomal protein S6	RPS6	26.2048	26.5038	26.3543	25.4596	25.7718	25.6157	25.1961	23.9751	24.5856	0.738545	-1.03011	1.76865	1.66849	0.489673	3.40736		11	11	11	41.8	41.8	41.8	28.68	119.02	149090000	190	5	3	6	6	9	6	5	3	6	6	9	6	5	3	6	6	9	6	22.1	11.2	26.1
P49721	Proteasome subunit beta type-2	PSMB2	24.6144	26.0934	25.3539	25.6525	26.0857	25.8691	24.4785	24.2025	24.3405	-0.515215	-1.52858	1.01337	0.699689	0.346618	2.01861		12	12	12	54.2	54.2	54.2	22.836	85.072	103650000	81	7	5	5	5	6	8	7	5	5	5	6	8	7	5	5	5	6	8	24.4	23.4	19.9
P13804	Electron transfer flavoprotein subunit alpha, mitochondrial	ETFA	25.7377	26.6398	26.1887	25.6241	26.2135	25.9188	25.4681	22.3496	23.9088	0.26993	-2.00995	2.27988	1.20575	0.248282	4.85638		16	16	16	65.5	65.5	65.5	35.079	193.73	378120000	246	11	11	10	12	12	5	11	11	10	12	12	5	11	11	10	12	12	5	47.1	43.2	40.2
P09622	Dihydrolipoyl dehydrogenase, mitochondrial	DLD	25.6888	25.9565	25.8227	26.1653	26.2696	26.2174	24.5143	24.102	24.3081	-0.39477	-1.90931	1.51454	0.760611	0.26622	2.85708		18	18	18	46	46	46	54.177	236.18	462850000	239	14	8	9	13	11	12	14	8	9	13	11	12	14	8	9	13	11	12	32.8	16.7	19.1
P12004	Proliferating cell nuclear antigen	PCNA	26.1915	26.5243	26.3579	25.8685	26.2127	26.0406	25.7091	22.7676	24.2383	0.317295	-1.80227	2.11957	1.24599	0.286723	4.34563		16	16	16	78.2	78.2	78.2	28.768	202.49	435320000	176	11	9	10	10	13	4	11	9	10	10	13	4	11	9	10	10	13	4	47.5	39.1	42.1
Q8N335	Glycerol-3-phosphate dehydrogenase 1-like protein	GPD1L	26.0764	26.2459	26.1611	25.8584	26.5709	26.2147	24.906	25.0175	24.9618	-0.053565	-1.25291	1.19935	0.963552	0.419601	2.29635		19	19	19	66.4	66.4	66.4	38.418	299.85	418100000	173	14	11	13	14	15	12	14	11	13	14	15	12	14	11	13	14	15	12	41.6	34.8	39.6
Q02878	60S ribosomal protein L6	RPL6	25.889	26.389	26.139	26.522	26.2626	26.3923	24.8745	24.8036	24.8391	-0.253305	-1.55321	1.2999	0.838972	0.340751	2.46213		12	12	12	37.8	37.8	37.8	32.728	94.693	282770000	197	8	7	8	7	12	9	8	7	8	7	12	9	8	7	8	7	12	9	31.9	22.2	24.3
P11940;Q9H361;Q4VXU2;Q96DU9	Polyadenylate-binding protein 1	PABPC1	26.7732	26.818	26.7956	26.4219	26.3843	26.4031	24.5389	24.9999	24.7694	0.392485	-1.63368	2.02616	1.31265	0.322266	4.07319	+	31	31	19	47	47	28.6	70.67	279.21	782490000	397	21	18	19	20	21	24	21	18	19	20	21	24	12	12	12	12	11	15	32.5	28.6	29.2
P13667	Protein disulfide-isomerase A4	PDIA4	26.0251	26.244	26.1345	26.8062	26.4952	26.6507	24.535	24.8368	24.6859	-0.516195	-1.96482	1.44862	0.699214	0.256172	2.72947		44	44	44	61.2	61.2	61.2	72.932	323.31	739990000	342	26	23	20	24	21	22	26	23	20	24	21	22	26	23	20	24	21	22	43.9	35.7	32.1
Q14697	Neutral alpha-glucosidase AB	GANAB	26.8982	26.693	26.7956	26.6389	26.6824	26.6607	24.8119	24.0696	24.4408	0.13489	-2.21993	2.35482	1.09801	0.214651	5.11532		44	44	44	47	47	47	106.87	323.31	992400000	390	30	21	22	26	32	24	30	21	22	26	32	24	30	21	22	26	32	24	32	20.8	21.8
O75390	Citrate synthase, mitochondrial	CS	26.0446	26.2343	26.1395	26.9438	26.614	26.7789	24.6409	24.4401	24.5405	-0.639445	-2.23841	1.59897	0.64196	0.211919	3.02927		13	13	12	26.4	26.4	24.5	51.712	96.903	740880000	142	11	9	11	9	9	7	11	9	11	9	9	7	10	8	10	8	8	6	24.5	19.7	23.4
P38117	Electron transfer flavoprotein subunit beta	ETFB	26.8835	26.8244	26.854	27.4019	26.9443	27.1731	24.9626	24.7473	24.8549	-0.319095	-2.31816	1.99907	0.801573	0.200523	3.99741		16	16	16	60	60	60	27.843	185.94	669940000	175	12	10	11	12	11	14	12	10	11	12	11	14	12	10	11	12	11	14	50.6	39.2	45.1
P61247	40S ribosomal protein S3a	RPS3A	27.0663	26.4714	26.7688	27.7243	26.8731	27.2987	27.3664	24.6123	25.9894	-0.529875	-1.30936	0.77949	0.692615	0.403498	1.71652		20	20	20	63.3	63.3	63.3	29.945	154.94	539480000	291	10	7	13	10	16	5	10	7	13	10	16	5	10	7	13	10	16	5	39.8	25.4	45.1
P63244	Guanine nucleotide-binding protein subunit beta-2-like 1;Guanine nucleotide-binding protein subunit beta-2-like 1, N-terminally processed	GNB2L1	27.5141	27.8565	27.6853	26.8252	27.4366	27.1309	27.8321	25.2829	26.5575	0.55443	-0.573405	1.12784	1.46859	0.672029	2.18531		19	19	19	78.9	78.9	78.9	35.076	323.31	1086400000	373	16	13	15	15	17	9	16	13	15	15	17	9	16	13	15	15	17	9	62.5	45.1	56.2
Q9Y365	PCTP-like protein	STARD10	26.1219	25.744	25.9329	26.0566	26.4344	26.2455	27.1517	27.4666	27.3092	-0.31254	1.06367	-1.37621	0.805223	2.09023	0.385231		17	17	17	58.4	58.4	58.4	33.048	323.31	612410000	238	8	7	6	8	17	12	8	7	6	8	17	12	8	7	6	8	17	12	27.1	26.8	22.3
Q9H0U4;Q92928	Ras-related protein Rab-1B;Putative Ras-related protein Rab-1C	RAB1B;RAB1C	26.3437	25.9699	26.1568	25.922	26.0855	26.0038	27.4883	27.3303	27.4093	0.153045	1.40555	-1.2525	1.11191	2.64918	0.41972		15	15	7	88.6	88.6	51.7	22.171	151.95	293280000	188	6	4	6	4	15	8	6	4	6	4	15	8	2	0	2	1	7	3	35.8	21.4	37.3
P68104;Q5VTE0	Elongation factor 1-alpha 1;Putative elongation factor 1-alpha-like 3	EEF1A1;EEF1A1P5	26.4457	25.6644	26.055	26.1239	26.042	26.0829	28.5038	28.5064	28.5051	-0.027885	2.42217	-2.45006	0.980857	5.35978	0.183003		33	19	19	70.8	47.6	47.6	50.14	192.75	1245500000	424	18	14	18	17	25	22	9	6	11	9	13	12	9	6	11	9	13	12	42.6	28.8	34.8
P62249	40S ribosomal protein S16	RPS16	26.3482	25.8191	26.0836	25.1887	26.2548	25.7217	27.6316	27.6966	27.6641	0.36191	1.94238	-1.58047	1.28513	3.84339	0.334373		12	12	12	53.4	53.4	53.4	16.445	36.544	205870000	182	8	4	5	5	10	9	8	4	5	5	10	9	8	4	5	5	10	9	41.8	25.3	32.9
P61088;Q5JXB2	Ubiquitin-conjugating enzyme E2 N	UBE2N	26.4202	26.0284	26.2243	25.9922	26.0702	26.0312	27.013	27.3156	27.1643	0.19314	1.13312	-0.939975	1.14325	2.19332	0.521242		11	11	11	77	77	77	17.138	104.89	161220000	125	7	2	2	7	11	8	7	2	2	7	11	8	7	2	2	7	11	8	35.5	11.8	11.8
P07741	Adenine phosphoribosyltransferase	APRT	26.9584	26.0422	26.5003	26.0685	25.9744	26.0215	27.1712	27.406	27.2886	0.47879	1.26713	-0.788335	1.39357	2.40681	0.579012		12	12	12	80.6	80.6	80.6	19.608	189.94	318460000	160	7	4	2	5	12	10	7	4	2	5	12	10	7	4	2	5	12	10	48.3	21.1	9.4
P18669;P15259;Q8N0Y7	Phosphoglycerate mutase 1	PGAM1	27.6883	24.4078	26.048	27.7055	25.3555	26.5305	27.7172	27.5689	27.6431	-0.48247	1.11257	-1.59504	0.715751	2.16231	0.331012		21	21	21	80.7	80.7	80.7	28.804	323.31	828100000	414	10	9	12	10	19	18	10	9	12	10	19	18	10	9	12	10	19	18	44.5	41.7	52.4
Q07020	60S ribosomal protein L18	RPL18	26.6506	25.8702	26.2604	25.8655	26.5498	26.2077	27.0672	26.6057	26.8365	0.05272	0.62879	-0.57607	1.03722	1.54627	0.670789		9	9	9	33.5	33.5	33.5	21.634	170.28	289460000	243	6	5	6	6	9	7	6	5	6	6	9	7	6	5	6	6	9	7	29.8	29.3	29.8
P63000;P15153	Ras-related C3 botulinum toxin substrate 1;Ras-related C3 botulinum toxin substrate 2	RAC1;RAC2	26.9926	26.8351	26.9138	26.2266	26.6067	26.4166	26.3443	26.2601	26.3022	0.497205	-0.114425	0.61163	1.41148	0.92375	1.52798		10	10	4	54.2	54.2	21.4	21.45	39.504	294700000	169	8	6	3	6	10	9	8	6	3	6	10	9	3	2	1	3	4	4	42.7	33.3	17.2
P60981	Destrin	DSTN	27.4133	26.5509	26.9821	25.3163	26.8441	26.0802	26.2673	26.73	26.4987	0.901885	0.418435	0.48345	1.86851	1.33648	1.39808		22	22	21	81.2	81.2	74.5	18.506	119.12	224780000	176	8	5	7	5	14	13	8	5	7	5	14	13	7	4	6	5	14	13	40	23.6	27.9
P35579	Myosin-9	MYH9	26.2356	26.2771	26.2563	25.6471	26.3345	25.9908	26.4515	26.4729	26.4622	0.26555	0.47142	-0.20587	1.20209	1.38647	0.867016		129	129	104	61.6	61.6	50.6	226.53	323.31	672640000	869	67	57	37	47	89	95	67	57	37	47	89	95	49	44	29	34	74	77	35.6	32.1	20.3
P35268	60S ribosomal protein L22	RPL22	26.7558	25.9323	26.344	25.3284	27.305	26.3167	26.847	26.5506	26.6988	0.02734	0.38209	-0.35475	1.01913	1.30323	0.782005		9	9	8	68.8	68.8	62.5	14.787	169.74	215480000	153	4	4	4	3	8	6	4	4	4	3	8	6	4	4	4	3	7	6	31.2	31.2	39.8
P25789	Proteasome subunit alpha type-4	PSMA4	26.5414	27.1483	26.8448	25.8918	25.9147	25.9032	26.6645	26.2729	26.4687	0.94163	0.565495	0.376135	1.9207	1.4799	1.29786		14	14	14	64	64	64	29.483	155.51	525610000	176	11	7	11	9	8	12	11	7	11	9	8	12	11	7	11	9	8	12	41	23.4	42.9
P23396	40S ribosomal protein S3	RPS3	26.4128	26.4441	26.4284	25.8589	26.022	25.9404	26.8625	27.115	26.9887	0.48799	1.04831	-0.560325	1.40249	2.06811	0.678149	+	23	23	23	74.5	74.5	74.5	26.688	195.95	491630000	373	13	10	13	13	14	16	13	10	13	13	14	16	13	10	13	13	14	16	51.9	40.3	52.7
P23284	Peptidyl-prolyl cis-trans isomerase B	PPIB	27.3315	26.5126	26.922	25.7483	26.7234	26.2358	26.4501	26.4651	26.4576	0.686215	0.22179	0.464425	1.60906	1.16618	1.37977		14	14	14	55.6	55.6	55.6	23.742	81.698	301870000	212	11	7	5	10	12	8	11	7	5	10	12	8	11	7	5	10	12	8	49.1	33.8	25
P15880	40S ribosomal protein S2	RPS2	26.6237	26.5603	26.592	26.3741	26.6422	26.5082	26.8928	26.3555	26.6242	0.08381	0.11603	-0.03222	1.05981	1.08375	0.977914		12	12	12	43.3	43.3	43.3	31.324	93.834	497410000	222	8	6	7	9	11	8	8	6	7	9	11	8	8	6	7	9	11	8	31.4	21.8	26.3
O75369	Filamin-B	FLNB	26.5352	26.9958	26.7655	25.9886	26.3316	26.1601	26.4606	26.3747	26.4177	0.6054	0.257545	0.347855	1.5214	1.19544	1.27267		135	127	125	66.1	64.1	63.5	278.16	323.31	721810000	910	63	77	55	60	107	101	58	70	53	56	103	97	58	68	52	54	101	95	30.2	39.1	26.2
P09467	Fructose-1,6-bisphosphatase 1	FBP1	26.6053	26.6657	26.6355	26.0288	26.5064	26.2676	26.6356	26.4677	26.5516	0.36794	0.28408	0.08386	1.29051	1.21763	1.05985		21	21	20	58.3	58.3	55	36.842	310.86	582850000	493	12	13	10	14	18	15	12	13	10	14	18	15	11	12	9	13	17	14	40.8	48.8	35.8
Q15907;P62491	Ras-related protein Rab-11B;Ras-related protein Rab-11A	RAB11B;RAB11A	26.6756	26.2622	26.4689	26.7566	26.397	26.5768	26.8708	26.359	26.6149	-0.10791	0.038065	-0.145975	0.927931	1.02674	0.903768		13	13	12	59.2	59.2	55.5	24.488	47.798	256370000	201	9	7	7	9	10	9	9	7	7	9	10	9	8	6	6	8	9	8	39.9	30.3	32.6
P61978	Heterogeneous nuclear ribonucleoprotein K	HNRNPK	26.2669	26.189	26.228	26.4521	26.669	26.5606	26.8049	26.1091	26.457	-0.332605	-0.10354	-0.229065	0.794101	0.930746	0.853188		20	20	20	51.8	51.8	51.8	50.976	323.31	466240000	388	9	7	7	9	19	16	9	7	7	9	19	16	9	7	7	9	19	16	22.7	17.1	16.4
P50991	T-complex protein 1 subunit delta	CCT4	25.8712	25.6136	25.7424	26.7119	26.5013	26.6066	27.1017	26.4338	26.7677	-0.86421	0.161135	-1.02534	0.549347	1.11817	0.491293	+	28	28	28	61.8	61.8	61.8	57.924	323.31	697020000	452	21	15	20	18	19	22	21	15	20	18	19	22	21	15	20	18	19	22	49.5	32.8	42.5
P28070	Proteasome subunit beta type-4	PSMB4	25.9983	26.3541	26.1762	26.9024	26.324	26.6132	26.6312	26.5422	26.5867	-0.43699	-0.02648	-0.41051	0.738674	0.981813	0.752357		9	9	9	50.4	50.4	50.4	29.204	121.03	255520000	135	5	4	5	5	8	8	5	4	5	5	8	8	5	4	5	5	8	8	22.3	14.8	22.3
P26373	60S ribosomal protein L13	RPL13	26.1817	25.9847	26.0832	26.0099	27.1399	26.5749	27.4002	26.84	27.1201	-0.491735	0.54516	-1.03689	0.711169	1.45918	0.487375		10	10	10	35.1	35.1	35.1	24.261	87.622	283380000	262	5	5	7	6	8	8	5	5	7	6	8	8	5	5	7	6	8	8	24.2	24.2	29.9
P08865	40S ribosomal protein SA	RPSA	25.5449	26.975	26.2599	26.7919	26.8439	26.8179	27.1753	26.9833	27.0793	-0.557965	0.261405	-0.81937	0.67926	1.19865	0.566689		16	16	16	58.6	58.6	58.6	32.854	215.3	754610000	262	9	6	7	8	14	11	9	6	7	8	14	11	9	6	7	8	14	11	26.8	25.1	30.2
P18124	60S ribosomal protein L7	RPL7	25.9746	25.5194	25.747	26.4877	26.1721	26.3299	26.833	26.6578	26.7454	-0.58286	0.41555	-0.99841	0.667639	1.33381	0.500551		18	18	18	50.4	50.4	50.4	29.225	86.338	444210000	227	12	8	13	10	12	14	12	8	13	10	12	14	12	8	13	10	12	14	40.7	29.8	41.1
Q9UQ80;H0YIN7	Proliferation-associated protein 2G4	PA2G4	26.5982	26.7226	26.6604	26.855	26.6851	26.77	26.1028	25.9738	26.0383	-0.10965	-0.73175	0.6221	0.926813	0.602173	1.53911		25	25	25	69	69	69	43.786	283.72	908450000	392	18	14	17	19	16	17	18	14	17	19	16	17	18	14	17	19	16	17	47	35.5	43.4
Q86VP6;O75155	Cullin-associated NEDD8-dissociated protein 1	CAND1	25.9696	26.0829	26.0263	26.8289	26.5777	26.7033	26.7624	25.3273	26.0449	-0.677055	-0.658455	-0.0186	0.625441	0.633556	0.98719	+	57	57	57	46.7	46.7	46.7	136.37	323.31	688580000	553	34	28	36	36	48	34	34	28	36	36	48	34	34	28	36	36	48	34	29	26.2	29.7
Q14974	Importin subunit beta-1	KPNB1	26.4258	27.0353	26.7305	26.344	26.9153	26.6296	26.1633	25.8459	26.0046	0.1009	-0.62502	0.72592	1.07244	0.648411	1.65396		34	34	34	50.8	50.8	50.8	97.169	323.31	1014100000	417	26	20	18	21	27	23	26	20	18	21	27	23	26	20	18	21	27	23	38.8	25.1	24.4
Q01518	Adenylyl cyclase-associated protein 1	CAP1	26.8433	26.6161	26.7297	26.5286	26.9812	26.7549	26.5108	26.0426	26.2767	-0.025235	-0.478205	0.45297	0.982661	0.71787	1.36886		26	26	25	56.8	56.8	55.2	51.901	323.31	729620000	391	17	12	14	13	19	19	17	12	14	13	19	19	16	11	13	12	19	19	39.8	26.9	30.1
P62277	40S ribosomal protein S13	RPS13	26.2528	26.006	26.1294	26.2278	26.7191	26.4734	26.532	25.7842	26.1581	-0.343995	-0.315315	-0.02868	0.787857	0.803675	0.980317		11	11	11	53	53	53	17.222	84.595	180140000	124	6	4	5	6	10	8	6	4	5	6	10	8	6	4	5	6	10	8	35.1	26.5	32.5
P55786;A6NEC2	Puromycin-sensitive aminopeptidase	NPEPPS	27.3461	26.742	27.0441	26.5414	27.0111	26.7762	26.2191	25.4626	25.8408	0.26786	-0.93538	1.20324	1.20402	0.522905	2.30256		47	47	47	59.2	59.2	59.2	103.28	323.31	1261700000	534	36	24	27	23	37	34	36	24	27	23	37	34	36	24	27	23	37	34	39.7	28.2	30.5
O95994	Anterior gradient protein 2 homolog	AGR2	26.6158	26.2297	26.4227	27.618	27.4334	27.5257	26.2749	25.9549	26.1149	-1.10296	-1.41078	0.30782	0.465562	0.37611	1.23784	+	10	10	9	65.7	65.7	59.4	19.979	87.329	213320000	126	6	3	3	6	10	7	6	3	3	6	10	7	5	2	2	5	9	6	32.6	16	16
O75223;M0QZK8	Gamma-glutamylcyclotransferase	GGCT	26.9069	26.2321	26.5695	26.6684	26.8251	26.7467	26.6249	25.4965	26.0607	-0.177265	-0.68605	0.508785	0.884378	0.621553	1.42285		16	16	16	88.8	88.8	88.8	21.007	232.48	316020000	323	11	8	8	10	15	12	11	8	8	10	15	12	11	8	8	10	15	12	58	49.5	49.5
O14818;Q8TAA3	Proteasome subunit alpha type-7	PSMA7	26.8297	26.0436	26.4366	27.2112	26.7347	26.973	26.5329	26.0927	26.3128	-0.53633	-0.660145	0.123815	0.689523	0.632815	1.08961		17	17	17	64.5	64.5	64.5	27.887	323.31	590390000	195	9	8	9	7	14	16	9	8	9	7	14	16	9	8	9	7	14	16	39.1	37.9	43.1
O75083	WD repeat-containing protein 1	WDR1	26.8992	26.2839	26.5915	26.109	26.4287	26.2688	26.4649	25.5596	26.0122	0.32271	-0.25659	0.5793	1.25068	0.837064	1.49412		29	29	29	66.8	66.8	66.8	66.193	323.31	655060000	337	24	16	14	14	18	18	24	16	14	14	18	18	24	16	14	14	18	18	58.4	31.2	26.9
Q9NY33	Dipeptidyl peptidase 3	DPP3	26.8391	26.7764	26.8077	26.8417	26.2348	26.5383	25.5358	25.8963	25.716	0.269475	-0.822235	1.09171	1.20537	0.565565	2.13127		33	33	33	59.6	59.6	59.6	82.588	323.31	876540000	334	17	14	14	14	26	24	17	14	14	14	26	24	17	14	14	14	26	24	30.5	25.4	22.4
Q04837	Single-stranded DNA-binding protein, mitochondrial	SSBP1	26.7822	26.8253	26.8037	27.5344	26.6824	27.1084	25.1694	25.6071	25.3882	-0.304705	-1.72021	1.4155	0.809608	0.303505	2.66753		7	7	7	50	50	50	17.259	112.67	152960000	118	4	3	3	4	6	7	4	3	3	4	6	7	4	3	3	4	6	7	27	20.9	20.9
P62979;P62987;P0CG47;P0CG48	Ubiquitin-40S ribosomal protein S27a;Ubiquitin;40S ribosomal protein S27a;Ubiquitin-60S ribosomal protein L40;Ubiquitin;60S ribosomal protein L40;Polyubiquitin-B;Ubiquitin;Polyubiquitin-C;Ubiquitin	RPS27A;UBA52;UBB;UBC	26.7638	27.3502	27.057	27.3299	26.798	27.0639	26.3112	25.8199	26.0656	-0.00693	-0.998355	0.991425	0.995208	0.50057	1.98815		7	7	7	54.5	54.5	54.5	17.965	136.83	583290000	281	7	3	5	4	6	4	7	3	5	4	6	4	7	3	5	4	6	4	54.5	24.4	34
P48735	Isocitrate dehydrogenase [NADP], mitochondrial	IDH2	27.4572	27.0713	27.2643	27.6419	27.1947	27.4183	26.2626	25.4839	25.8733	-0.154045	-1.54504	1.391	0.898727	0.342686	2.62259		28	28	27	51.3	51.3	51.3	50.909	323.31	1506700000	514	22	20	19	22	18	21	22	20	19	22	18	21	21	19	18	21	17	20	46.9	44	43.1
P48668	Keratin, type II cytoskeletal 6C	KRT6C	26.1017	28.1774	27.1395	27.6065	26.5447	27.0756	25.8855	25.8911	25.8883	0.063935	-1.1873	1.25123	1.04531	0.439124	2.38045		50	33	0	60.3	47.2	0	60.024	293.65	716710000	659	25	27	33	21	40	30	16	16	21	12	27	20	0	0	0	0	0	0	38.7	41.3	45
P30101	Protein disulfide-isomerase A3	PDIA3	26.5367	27.4306	26.9837	27.3627	27.4397	27.4012	24.6898	25.6659	25.1778	-0.417515	-2.22336	1.80585	0.748713	0.214141	3.49635		30	30	30	63	63	63	56.782	307.01	1106900000	329	24	15	18	21	20	22	24	15	18	21	20	22	24	15	18	21	20	22	52.5	33.1	33.7
P26639	Threonine--tRNA ligase, cytoplasmic	TARS	27.2386	26.4999	26.8693	26.5943	26.4034	26.4989	25.322	25.2986	25.3103	0.370385	-1.18862	1.559	1.2927	0.438724	2.9465		43	43	40	57	57	53.7	83.434	323.31	851270000	389	26	24	21	24	33	30	26	24	21	24	33	30	24	23	20	22	31	27	38.9	36.4	28.8
P25786;B4DEV8	Proteasome subunit alpha type-1;Proteasome subunit alpha type	PSMA1	26.5763	27.0481	26.8122	26.4774	26.6663	26.5718	25.8699	25.3577	25.6138	0.240375	-0.95802	1.19839	1.1813	0.514763	2.29484		22	22	22	77.6	77.6	77.6	29.555	152.82	535830000	230	13	8	14	10	15	9	13	8	14	10	15	9	13	8	14	10	15	9	45.6	30.4	43.3
P14625;Q58FF3	Endoplasmin	HSP90B1	27.3709	26.7713	27.0711	27.6558	27.7453	27.7006	26.1293	25.8622	25.9957	-0.62947	-1.70484	1.07538	0.646414	0.306754	2.10727		55	53	53	57.9	56.2	56.2	92.468	323.31	1520000000	544	36	29	31	26	38	27	34	27	29	24	36	25	34	27	29	24	36	25	43.8	35.1	36.9
I3L0A0;Q13404	Ubiquitin-conjugating enzyme E2 variant 1	TMEM189-UBE2V1;UBE2V1	26.7365	26.9054	26.8209	26.2964	27.1044	26.7004	25.3834	26.3444	25.8639	0.12053	-0.83648	0.95701	1.08713	0.560008	1.94128		12	12	5	28.1	28.1	12.7	42.208	91.487	223980000	176	8	6	7	8	12	8	8	6	7	8	12	8	4	3	4	4	5	2	20.5	14.1	18.6
P11021	78 kDa glucose-regulated protein	HSPA5	26.8899	26.6447	26.7673	27.2332	26.3537	26.7934	25.7278	25.6997	25.7138	-0.02611	-1.07967	1.05356	0.982065	0.473135	2.07565		39	38	38	52.3	52.3	52.3	72.332	323.31	978900000	411	28	19	22	19	23	24	27	18	21	18	22	23	27	18	21	18	22	23	42	34.1	33.2
Q9NTK5	Obg-like ATPase 1	OLA1	27.6489	27.1555	27.4022	26.9749	26.8334	26.9041	26.4907	26.373	26.4318	0.49805	-0.4723	0.97035	1.4123	0.720815	1.95932		29	29	29	77.3	77.3	77.3	44.743	238.54	1352900000	289	16	16	17	17	15	18	16	16	17	17	15	18	16	16	17	17	15	18	43.9	46	45.7
Q9BS40	Latexin	LXN	27.1896	27.798	27.4938	27.0672	27.1045	27.0859	26.1318	26.1606	26.1462	0.407965	-0.93966	1.34763	1.32681	0.521356	2.54493		6	6	6	36.5	36.5	36.5	25.75	126.08	937300000	254	5	4	5	4	6	5	5	4	5	4	6	5	5	4	5	4	6	5	23	22.1	23
Q15365;P57723	Poly(rC)-binding protein 1	PCBP1	27.1908	27.3318	27.2613	26.867	27.0222	26.9446	27.4305	26.611	27.0208	0.31668	0.076175	0.240505	1.24546	1.05422	1.18141		16	16	12	82.3	82.3	69.1	37.497	323.31	477240000	483	7	9	8	9	14	13	7	9	8	9	14	13	5	5	5	6	12	10	26.4	30.9	28.7
P61981	14-3-3 protein gamma;14-3-3 protein gamma, N-terminally processed	YWHAG	27.4144	26.8416	27.128	27.1688	27.0415	27.1051	25.9986	26.4741	26.2364	0.02286	-0.868775	0.891635	1.01597	0.547612	1.85528		16	10	10	66	49.8	49.8	28.302	245.75	695250000	218	12	10	13	10	11	11	7	6	8	6	7	7	7	6	8	6	7	7	44.1	40.1	51.8
P60900	Proteasome subunit alpha type-6	PSMA6	26.4438	27.0829	26.7633	26.7004	27.3619	27.0311	26.6966	26.6209	26.6587	-0.267785	-0.37241	0.104625	0.830594	0.772491	1.07521		18	18	18	62.6	62.6	62.6	27.399	195.52	654110000	281	11	13	13	11	13	13	11	13	13	11	13	13	11	13	13	11	13	13	42.3	52	46.3
P55072	Transitional endoplasmic reticulum ATPase	VCP	27.4313	27.4273	27.4293	26.2682	26.8683	26.5682	26.659	26.9159	26.7874	0.861055	0.219195	0.64186	1.81637	1.16408	1.56034		55	55	55	72.1	72.1	72.1	89.321	323.31	1403600000	723	39	32	28	30	42	43	39	32	28	30	42	43	39	32	28	30	42	43	54.5	48.9	38
P53396	ATP-citrate synthase	ACLY	27.2841	27.4668	27.3755	26.3134	26.7612	26.5373	26.5687	26.5909	26.5798	0.838195	0.042535	0.79566	1.78781	1.02992	1.73587		52	52	52	53	53	53	120.84	323.31	981810000	802	39	27	26	27	42	35	39	27	26	27	42	35	39	27	26	27	42	35	43.2	29.4	27.8
P46940	Ras GTPase-activating-like protein IQGAP1	IQGAP1	27.0928	27.111	27.1019	26.3487	26.919	26.6339	26.2856	27.1509	26.7183	0.46804	0.08439	0.38365	1.38323	1.06024	1.30464		98	98	93	64	64	61.7	189.25	323.31	1143700000	951	54	44	42	46	78	76	54	44	42	46	78	76	51	41	39	44	74	74	37.6	31.3	28.3
P46781	40S ribosomal protein S9	RPS9	27.353	26.882	27.1175	26.8338	27.252	27.0429	27.2188	26.1409	26.6798	0.07468	-0.363015	0.437695	1.05313	0.777538	1.35444		15	15	15	48.5	48.5	48.5	22.591	78.079	372870000	296	10	7	8	8	13	10	10	7	8	8	13	10	10	7	8	8	13	10	38.1	32	37.6
P38646	Stress-70 protein, mitochondrial	HSPA9	27.4338	27.4961	27.465	26.6438	27.2893	26.9665	26.3744	26.3159	26.3452	0.498425	-0.62137	1.1198	1.41267	0.650053	2.17316		41	41	41	61.7	61.7	61.7	73.68	323.31	1450800000	634	28	30	28	27	19	29	28	30	28	27	19	29	28	30	28	27	19	29	45.9	48.3	45.5
P34932	Heat shock 70 kDa protein 4	HSPA4	27.2952	26.9648	27.13	27.0501	26.807	26.9285	26.7484	27.0052	26.8768	0.20144	-0.05174	0.25318	1.14985	0.964772	1.19183		63	63	59	74.5	74.5	70.8	94.33	323.31	1311300000	821	37	29	35	30	49	46	37	29	35	30	49	46	34	27	33	28	47	44	54.9	40	50.4
P31948	Stress-induced-phosphoprotein 1	STIP1	27.5544	27.3531	27.4538	26.4136	26.903	26.6583	26.4476	26.8059	26.6267	0.795505	-0.031535	0.82704	1.73568	0.978379	1.77404		51	51	51	66.9	66.9	66.9	62.639	323.31	1210600000	452	30	23	24	30	30	24	30	23	24	30	30	24	30	23	24	30	30	24	49.5	39.6	42.9
P28072	Proteasome subunit beta type-6	PSMB6	27.6136	27.915	27.7643	26.4648	27.4869	26.9759	26.9188	26.1668	26.5428	0.78841	-0.43308	1.22149	1.72717	0.740679	2.33187		7	7	7	46.9	46.9	46.9	25.357	32.676	374500000	140	4	4	4	3	5	5	4	4	4	3	5	5	4	4	4	3	5	5	17.6	16.7	16.7
O14745	Na(+)/H(+) exchange regulatory cofactor NHE-RF1	SLC9A3R1	27.1779	27.7858	27.4818	27.4066	26.5754	26.991	26.298	26.5836	26.4408	0.49082	-0.55016	1.04098	1.40524	0.682944	2.05762		16	16	16	54.5	54.5	54.5	38.868	183.37	1047500000	464	15	7	13	10	12	13	15	7	13	10	12	13	15	7	13	10	12	13	52.2	27.1	44.1
O75874	Isocitrate dehydrogenase [NADP] cytoplasmic	IDH1	27.972	27.0631	27.5176	26.6349	26.7751	26.705	26.0694	26.6402	26.3548	0.812585	-0.35018	1.16277	1.75636	0.784486	2.23886		25	24	24	64.3	62.1	62.1	46.659	323.31	1466400000	393	19	20	15	19	14	18	18	19	14	18	13	17	18	19	14	18	13	17	47.6	56.3	43.2
Q96KP4	Cytosolic non-specific dipeptidase	CNDP2	25.9525	25.953	25.9528	25.8898	25.5775	25.7336	19.9772	24.71	22.3436	0.21913	-3.39002	3.60915	1.16403	0.0953902	12.2028		21	21	21	56	56	56	52.878	100.3	406330000	174	17	12	13	16	0	14	17	12	13	16	0	14	17	12	13	16	0	14	48.6	35.4	36.2
Q16851	UTP--glucose-1-phosphate uridylyltransferase	UGP2	25.4351	25.947	25.691	25.4787	25.9277	25.7032	19.3727	24.6749	22.0238	-0.01217	-3.6794	3.66724	0.9916	0.0780528	12.7042		19	19	19	49	49	49	56.94	128.68	333790000	136	9	11	9	12	0	12	9	11	9	12	0	12	9	11	9	12	0	12	19.7	21.5	18.9
P48637	Glutathione synthetase	GSS	26.4514	26.3671	26.4092	25.9181	25.8629	25.8905	18.0777	24.0057	21.0417	0.518735	-4.84874	5.36747	1.4327	0.0347045	41.2828	+	23	23	23	50.8	50.8	50.8	52.384	323.31	485940000	155	14	15	14	14	0	15	14	15	14	14	0	15	14	15	14	14	0	15	36.5	31.6	32.9
P34897	Serine hydroxymethyltransferase, mitochondrial	SHMT2	25.4374	26.6775	26.0574	26.6943	27.0739	26.8841	17.8204	24.7501	21.2852	-0.82668	-5.59885	4.77217	0.563825	0.0206338	27.3254		24	24	23	60.3	60.3	57.5	55.992	227.35	667200000	181	19	14	13	15	0	12	19	14	13	15	0	12	18	13	12	14	0	11	49.4	28.6	26.6
P28838	Cytosol aminopeptidase	LAP3	26.122	26.8385	26.4802	25.7035	26.5115	26.1075	20.311	25.1473	22.7291	0.372705	-3.37839	3.75109	1.29478	0.096162	13.4646		27	27	27	62.2	62.2	62.2	56.166	323.31	568130000	288	24	17	16	16	3	21	24	17	16	16	3	21	24	17	16	16	3	21	58.2	40.5	38.2
P14868	Aspartate--tRNA ligase, cytoplasmic	DARS	25.3721	25.9916	25.6818	25.3139	25.9416	25.6278	19.7729	25.752	22.7625	0.054075	-2.86529	2.91937	1.03819	0.137234	7.56516		27	27	27	62.1	62.1	62.1	57.136	323.31	340880000	284	21	17	16	18	0	22	21	17	16	18	0	22	21	17	16	18	0	22	49.3	37.7	37.3
P12081	Histidine--tRNA ligase, cytoplasmic	HARS	25.8973	26.8254	26.3614	25.6334	26.2967	25.965	19.6054	25.2415	22.4234	0.396355	-3.54157	3.93793	1.31618	0.0858779	15.3262		29	29	23	65.2	65.2	53.8	57.41	208.14	486960000	210	17	14	14	18	4	21	17	14	14	18	4	21	12	9	9	13	2	16	36.5	27.7	26.3
P00367	Glutamate dehydrogenase 1, mitochondrial	GLUD1	26.3272	26.3043	26.3158	25.9227	26.2356	26.0791	18.2521	24.2046	21.2283	0.23662	-4.8508	5.08742	1.17823	0.0346548	33.999		25	25	10	53	53	22.9	61.397	163.1	499430000	230	19	14	16	18	0	17	19	14	16	18	0	17	7	5	7	7	0	4	40.1	30.8	36.9
P00390	Glutathione reductase, mitochondrial	GSR	26.9669	27.8926	27.4297	25.5033	26.3973	25.9503	20.519	26.4939	23.5064	1.4794	-2.44389	3.92329	2.78833	0.183787	15.1715		20	20	20	60.2	60.2	60.2	56.256	177.49	887560000	185	14	12	8	10	3	17	14	12	8	10	3	17	14	12	8	10	3	17	43.5	34.3	18.2
Q9Y265	RuvB-like 1	RUVBL1	24.8224	24.5225	24.6724	25.0647	25.7277	25.3962	17.2198	25.8542	21.537	-0.72374	-3.85919	3.13546	0.605526	0.0689075	8.78751		20	20	20	59	59	59	50.227	254.93	268900000	194	16	13	15	14	2	16	16	13	15	14	2	16	16	13	15	14	2	16	48.7	42.3	45
Q13228	Selenium-binding protein 1	SELENBP1	25.7201	25.426	25.573	25.3102	25.9905	25.6504	17.1042	24.2091	20.6566	-0.077335	-4.99375	4.91641	0.947807	0.0313858	30.1986		26	26	26	57.8	57.8	57.8	52.39	243.14	350700000	187	18	14	16	20	0	19	18	14	16	20	0	19	18	14	16	20	0	19	47.5	37.1	38.3
P49419	Alpha-aminoadipic semialdehyde dehydrogenase	ALDH7A1	23.9107	25.1847	24.5477	25.3035	25.8959	25.5997	18.2255	23.5868	20.9061	-1.05205	-4.69357	3.64152	0.482282	0.0386451	12.4798		20	20	20	41.7	41.7	41.7	58.486	152.13	269420000	137	16	9	15	14	1	10	16	9	15	14	1	10	16	9	15	14	1	10	37.5	18.6	28.8
P06576	ATP synthase subunit beta, mitochondrial	ATP5B	26.3955	24.3655	25.3805	26.6495	25.6681	26.1588	19.3522	25.3778	22.365	-0.778325	-3.79381	3.01549	0.583043	0.0721021	8.08636		20	20	20	49.5	49.5	49.5	56.559	284.79	545160000	354	17	11	14	16	1	13	17	11	14	16	1	13	17	11	14	16	1	13	43.5	28.7	34.2
P25705	ATP synthase subunit alpha, mitochondrial	ATP5A1	24.7112	24.3716	24.5414	26.4451	26.0538	26.2495	19.191	24.4641	21.8275	-1.70805	-4.42196	2.7139	0.306072	0.0466508	6.56093	+	24	24	24	50.6	50.6	50.6	59.75	171.69	331290000	163	12	8	15	12	0	15	12	8	15	12	0	15	12	8	15	12	0	15	24.6	16.5	29.5
Q9ULA0	Aspartyl aminopeptidase	DNPEP	25.0272	24.8533	24.9402	23.9318	24.1748	24.0533	19.9266	23.3148	21.6207	0.88698	-2.43257	3.31956	1.8493	0.185235	9.98356	+	16	16	16	45.7	45.7	45.7	52.428	85.201	171850000	80	10	6	6	10	0	10	10	6	6	10	0	10	10	6	6	10	0	10	25.7	17.9	18.3
Q8NDH3	Probable aminopeptidase NPEPL1	NPEPL1	24.66	24.2052	24.4326	24.4295	24.0452	24.2373	18.3556	23.4363	20.896	0.19526	-3.34138	3.53664	1.14493	0.0986611	11.6047		11	11	11	32.5	32.5	32.5	55.86	76.586	131710000	98	8	6	6	7	1	10	8	6	6	7	1	10	8	6	6	7	1	10	21	15.1	15.1
Q16576	Histone-binding protein RBBP7	RBBP7	25.0947	25.0046	25.0496	24.9545	25.1438	25.0491	19.6173	23.7424	21.6799	0.00047	-3.36929	3.36976	1.00033	0.0967704	10.3371		16	16	9	56.9	56.9	44.5	47.82	72.741	244500000	106	10	9	10	7	2	12	10	9	10	7	2	12	6	2	4	1	0	8	33.9	21.2	26.1
Q16401	26S proteasome non-ATPase regulatory subunit 5	PSMD5	23.6356	23.7728	23.7042	23.7752	23.8097	23.7924	18.8292	23.9327	21.381	-0.08823	-2.41146	2.32324	0.940676	0.187965	5.00453		19	19	19	51.6	51.6	51.6	56.195	129.99	106720000	103	13	9	10	13	0	12	13	9	10	13	0	12	13	9	10	13	0	12	33.1	23.2	26
Q12765	Secernin-1	SCRN1	25.536	25.2656	25.4008	24.4293	24.5747	24.502	19.0789	23.606	21.3425	0.898795	-3.15953	4.05833	1.86451	0.111914	16.6602	+	19	19	19	49	49	49	46.382	99.021	252330000	123	15	10	10	12	0	12	15	10	10	12	0	12	15	10	10	12	0	12	38.4	25.8	24.6
Q01581;P54868	Hydroxymethylglutaryl-CoA synthase, cytoplasmic	HMGCS1	25.1112	25.9465	25.5289	24.1184	25.2431	24.6808	20.077	23.9429	22.01	0.84813	-2.6708	3.51893	1.80017	0.15704	11.4631		24	24	24	51.3	51.3	51.3	57.293	217.21	281250000	138	19	13	12	14	4	13	19	13	12	14	4	13	19	13	12	14	4	13	38.5	26.2	24.6
P63151;Q00005;Q9Y2T4	Serine/threonine-protein phosphatase 2A 55 kDa regulatory subunit B alpha isoform	PPP2R2A	23.7087	23.9923	23.8505	23.4308	23.6828	23.5568	18.9843	24.2646	21.6244	0.293685	-1.93241	2.2261	1.22577	0.26199	4.67867		11	11	7	33.8	33.8	22.1	51.691	140.91	96559000	76	4	5	4	5	1	8	4	5	4	5	1	8	3	4	4	4	0	5	12.1	11	10.1
P62495	Eukaryotic peptide chain release factor subunit 1	ETF1	24.298	23.0974	23.6977	23.5949	23.7672	23.681	18.5834	25.1245	21.854	0.016645	-1.82709	1.84374	1.0116	0.281832	3.58939		17	17	17	43.9	43.9	43.9	49.03	137.3	115030000	112	10	7	4	8	1	15	10	7	4	8	1	15	10	7	4	8	1	15	25.4	17.2	10.5
P49189	4-trimethylaminobutyraldehyde dehydrogenase	ALDH9A1	24.5187	24.6377	24.5782	23.7576	24.833	24.2953	20.5493	23.4785	22.0139	0.282935	-2.28136	2.56429	1.21667	0.205704	5.91464		18	18	18	39.9	39.9	39.9	53.801	178.13	151020000	131	15	11	14	10	0	11	15	11	14	10	0	11	15	11	14	10	0	11	35.4	25.5	30.8
P26196	Probable ATP-dependent RNA helicase DDX6	DDX6	23.8722	23.1395	23.5059	24.0491	23.6139	23.8315	19.5034	24.7003	22.1018	-0.325635	-1.72969	1.40406	0.797947	0.301516	2.64645		19	19	19	50.5	50.5	50.5	54.416	199.59	120050000	117	11	8	11	10	2	17	11	8	11	10	2	17	11	8	11	10	2	17	31.1	21.9	29.4
P34896	Serine hydroxymethyltransferase, cytosolic	SHMT1	24.7539	25.0246	24.8892	24.578	24.8467	24.7123	18.5227	23.4399	20.9813	0.176925	-3.73103	3.90795	1.13047	0.0753095	15.011		15	14	14	37.9	35	35	53.082	187.84	184270000	126	11	10	10	11	0	11	10	9	9	10	0	10	10	9	9	10	0	10	29.4	24.4	22.4
O00232	26S proteasome non-ATPase regulatory subunit 12	PSMD12	25.8635	24.4714	25.1675	24.0399	24.7977	24.4188	22.268	23.9376	23.1028	0.74865	-1.316	2.06465	1.68022	0.401647	4.18332		25	25	25	52.4	52.4	52.4	52.904	323.31	246150000	191	21	13	15	16	6	15	21	13	15	16	6	15	21	13	15	16	6	15	42.8	28.1	33.3
P80404	4-aminobutyrate aminotransferase, mitochondrial	ABAT	25.3975	25.1705	25.284	24.4154	24.8934	24.6544	22.2487	23.0772	22.663	0.62963	-1.99146	2.62109	1.54717	0.251485	6.15213		25	25	25	61.2	61.2	61.2	56.438	180.02	221190000	122	19	9	11	12	5	9	19	9	11	12	5	9	19	9	11	12	5	9	42.8	19.2	27.8
Q92734	Protein TFG	TFG	24.2721	24.5856	24.4288	24.4861	24.4022	24.4442	21.9164	23.352	22.6342	-0.01534	-1.80996	1.79462	0.989423	0.2852	3.46923		4	4	4	16.5	16.5	16.5	43.447	15.947	61318000	69	3	3	3	3	3	4	3	3	3	3	3	4	3	3	3	3	3	4	11.8	11.8	11.8
P31153;Q00266	S-adenosylmethionine synthase isoform type-2	MAT2A	25.1589	23.8888	24.5239	24.6497	24.2563	24.453	22.353	23.2789	22.816	0.07089	-1.637	1.70789	1.05036	0.321524	3.26683		16	16	16	45.6	45.6	45.6	43.66	111.81	189620000	109	15	5	8	9	4	10	15	5	8	9	4	10	15	5	8	9	4	10	43.3	14.4	21
Q8NBS9	Thioredoxin domain-containing protein 5	TXNDC5	25.2154	23.746	24.4807	25.4544	24.9141	25.1842	21.5861	23.4169	22.5015	-0.70355	-2.68276	1.97921	0.614059	0.155743	3.94278		12	12	12	33.3	33.3	33.3	47.628	77.95	219870000	105	11	8	9	9	3	7	11	8	9	9	3	7	11	8	9	9	3	7	31.9	20.8	25.2
Q15084	Protein disulfide-isomerase A6	PDIA6	24.7719	24.5799	24.6759	25.6985	24.9773	25.3379	22.4221	25.0953	23.7587	-0.66197	-1.57914	0.91717	0.632015	0.334681	1.88841		17	17	17	48.4	48.4	48.4	48.121	216.9	223330000	223	11	9	13	14	7	14	11	9	13	14	7	14	11	9	13	14	7	14	32.3	23	35
P43490	Nicotinamide phosphoribosyltransferase	NAMPT	25.8397	25.7738	25.8068	25.4153	25.5261	25.4707	21.9111	25.3777	23.6444	0.33606	-1.82631	2.16237	1.2623	0.281986	4.47648	+	26	26	26	62.1	62.1	62.1	55.52	195.32	395560000	191	18	13	12	11	6	20	18	13	12	11	6	20	18	13	12	11	6	20	48.1	31.4	28.9
P23381	Tryptophan--tRNA ligase, cytoplasmic;T1-TrpRS;T2-TrpRS	WARS	24.4084	25.0958	24.7521	25.349	25.6307	25.4899	21.9799	25.1766	23.5782	-0.73775	-1.91165	1.17389	0.599674	0.265789	2.2562		25	25	25	70.3	70.3	70.3	53.165	323.31	275370000	276	18	11	14	11	6	19	18	11	14	11	6	19	18	11	14	11	6	19	55.8	28	35.7
P41091;Q2VIR3;F8W810	Eukaryotic translation initiation factor 2 subunit 3;Putative eukaryotic translation initiation factor 2 subunit 3-like protein	EIF2S3;EIF2S3L	24.183	25.1298	24.6564	24.9973	25.1083	25.0528	20.652	25.0188	22.8354	-0.39641	-2.21738	1.82097	0.759746	0.215032	3.53319		20	20	20	49.4	49.4	49.4	51.109	122.38	180500000	189	16	8	11	7	2	13	16	8	11	7	2	13	16	8	11	7	2	13	37.3	18.9	26.1
P16152	Carbonyl reductase [NADPH] 1	CBR1	26.382	25.8681	26.1251	23.8235	24.3434	24.0834	25.9122	22.5032	24.2077	2.04166	0.124235	1.91743	4.11719	1.08993	3.77748	+	16	14	14	67.9	57.4	57.4	30.375	290.12	322390000	161	13	12	8	10	13	5	11	10	6	8	11	3	11	10	6	8	11	3	61.7	55.2	36.5
P09429;B2RPK0;P23497	High mobility group protein B1	HMGB1	24.1675	21.1147	22.6411	23.7254	23.2641	23.4947	26.3728	25.9657	26.1693	-0.853625	2.67452	-3.52814	0.553393	6.38426	0.0866807		20	20	18	54	54	44.2	24.893	131.42	117850000	242	9	4	8	9	16	10	9	4	8	9	16	10	8	3	7	7	14	9	28.8	24.7	40
P24666	Low molecular weight phosphotyrosine protein phosphatase	ACP1	23.8067	22.8133	23.31	22.5146	24.5671	23.5409	25.6099	25.2716	25.4408	-0.230905	1.89991	-2.13082	0.8521	3.73191	0.228328		10	10	10	70.3	70.3	70.3	18.042	132.94	41305000	121	4	4	4	4	9	10	4	4	4	4	9	10	4	4	4	4	9	10	31.6	31.6	31.6
P51991	Heterogeneous nuclear ribonucleoprotein A3	HNRNPA3	23.6102	22.9419	23.276	23.7132	24.7132	24.2132	26.014	24.8279	25.4209	-0.937175	1.20773	-2.1449	0.522255	2.30973	0.226111		22	22	22	45	45	45	39.594	175.82	150290000	134	7	3	6	5	20	11	7	3	6	5	20	11	7	3	6	5	20	11	19	7.9	14.6
Q16719	Kynureninase	KYNU	23.6942	23.5608	23.6275	23.1532	22.2563	22.7047	24.9152	25.4626	25.1889	0.92278	2.48413	-1.56135	1.89576	5.59497	0.338834		21	21	21	54.6	54.6	54.6	52.351	172.54	143740000	134	11	9	5	9	15	12	11	9	5	9	15	12	11	9	5	9	15	12	24.3	18.7	11.4
P52895	Aldo-keto reductase family 1 member C2	AKR1C2	25.7999	23.0066	24.4033	20.6697	21.6892	21.1795	26.7005	26.3352	26.5179	3.2238	5.33841	-2.11461	9.34244	40.4596	0.230908		25	5	5	81.1	25.7	25.7	36.735	182.45	251240000	87	13	10	6	5	22	19	2	2	2	2	5	4	2	2	2	2	5	4	36.5	38.4	16.4
P46782	40S ribosomal protein S5;40S ribosomal protein S5, N-terminally processed	RPS5	22.7999	22.4049	22.6024	25.1097	22.9731	24.0414	25.921	25.8727	25.8969	-1.439	1.85547	-3.29447	0.368823	3.61868	0.101922		8	8	8	37.7	37.7	37.7	22.876	167.2	60981000	85	2	2	4	2	7	7	2	2	4	2	7	7	2	2	4	2	7	7	10.3	8.3	19.6
P20073	Annexin A7	ANXA7	23.8691	23.5339	23.7015	23.6632	23.2504	23.4568	25.6916	25.5459	25.6187	0.24468	2.16193	-1.91726	1.18483	4.47515	0.264758		15	15	15	31.6	31.6	31.6	52.739	147.62	154290000	131	11	6	10	7	10	12	11	6	10	7	10	12	11	6	10	7	10	12	28.1	12.9	24.8
P08133	Annexin A6	ANXA6	23.888	23.4413	23.6646	22.7836	23.7508	23.2672	25.6328	25.5424	25.5876	0.397445	2.32043	-1.92299	1.31717	4.99481	0.263708		50	50	50	68.5	68.5	68.5	75.872	296.23	165950000	162	18	11	7	15	34	30	18	11	7	15	34	30	18	11	7	15	34	30	32.2	17.1	11.1
P07910	Heterogeneous nuclear ribonucleoproteins C1/C2	HNRNPC	23.4674	23.6498	23.5586	23.7261	23.553	23.6395	26.7833	26.4011	26.5922	-0.080965	2.95266	-3.03362	0.945425	7.74172	0.122121		15	15	8	38.6	38.6	26.5	33.67	158.77	114440000	186	4	3	9	8	14	11	4	3	9	8	14	11	1	1	4	5	7	5	10.8	10.5	25.8
O14980	Exportin-1	XPO1	23.8287	23.3514	23.59	23.3851	23.5035	23.4443	25.1817	25.5494	25.3655	0.145755	1.92126	-1.7755	1.10631	3.78754	0.292092		42	42	42	48.6	48.6	48.6	123.38	323.31	175920000	247	18	12	15	21	33	30	18	12	15	21	33	30	18	12	15	21	33	30	20.6	11.5	15.4
P00491	Purine nucleoside phosphorylase	PNP	23.3365	23.0641	23.2003	23.1579	22.9191	23.0385	24.8258	25.6749	25.2504	0.16176	2.2119	-2.05014	1.11865	4.63285	0.241461		19	19	19	80.3	80.3	80.3	32.118	199.74	107080000	165	8	8	9	9	16	13	8	8	9	9	16	13	8	8	9	9	16	13	32.5	32.2	37.4
Q9BQE3	Tubulin alpha-1C chain	TUBA1C	23.76	21.7996	22.7798	24.3847	24.0792	24.2319	23.021	25.7164	24.3687	-1.45216	0.136765	-1.58892	0.365475	1.09944	0.33242		29	5	4	73.3	18	15.1	49.895	323.31	149760000	186	19	18	18	19	19	26	4	3	4	3	2	3	3	2	3	2	1	2	57.5	46.3	46.3
Q12904	Aminoacyl tRNA synthase complex-interacting multifunctional protein 1;Endothelial monocyte-activating polypeptide 2	AIMP1	23.7401	22.2211	22.9806	23.6772	23.7588	23.718	24.5357	24.5551	24.5454	-0.73741	0.82741	-1.56482	0.599815	1.7745	0.33802		16	16	16	67	67	67	34.352	164.29	82458000	102	12	5	7	6	12	11	12	5	7	6	12	11	12	5	7	6	12	11	43.9	17.9	34.3
Q00688	Peptidyl-prolyl cis-trans isomerase FKBP3	FKBP3	24.1322	22.5403	23.3362	24.5203	23.9001	24.2102	23.6785	24.8856	24.2821	-0.873995	0.07184	-0.945835	0.545634	1.05106	0.519129		12	12	12	53.6	53.6	53.6	25.177	70.857	93277000	96	7	3	8	8	8	7	7	3	8	8	8	7	7	3	8	8	8	7	27.7	13.4	31.2
O43399	Tumor protein D54	TPD52L2	23.2218	22.0486	22.6352	24.363	23.3115	23.8372	24.5022	25.0768	24.7895	-1.20204	0.952255	-2.1543	0.434659	1.93489	0.224642		13	13	13	68.9	68.9	68.9	22.237	123.16	68771000	119	8	5	6	8	9	9	8	5	6	8	9	9	8	5	6	8	9	9	52.9	25.2	34.5
P55209	Nucleosome assembly protein 1-like 1	NAP1L1	24.548	22.5161	23.532	24.253	23.8822	24.0676	23.2565	24.6003	23.9284	-0.53556	-0.13919	-0.39637	0.689891	0.908029	0.759768		11	11	9	30.7	30.7	28.1	45.374	137.35	148100000	130	7	5	6	7	10	8	7	5	6	7	10	8	5	4	5	6	8	6	14.8	14.6	14.8
Q13838	Spliceosome RNA helicase DDX39B	DDX39B	23.9533	23.8148	23.8841	24.5964	24.5043	24.5503	22.7105	25.3127	24.0116	-0.66628	-0.53877	-0.12751	0.630129	0.688358	0.91541	+	19	19	7	53.3	53.3	22.7	48.991	123.81	151730000	148	14	5	8	7	7	15	14	5	8	7	7	15	6	1	3	1	3	5	37.1	11.7	18.5
Q13247;Q08170	Serine/arginine-rich splicing factor 6;Serine/arginine-rich splicing factor 4	SRSF6;SRSF4	23.5678	23.9321	23.7499	24.5815	24.3949	24.4882	22.2778	24.3695	23.3237	-0.738245	-1.16454	0.42629	0.599468	0.446108	1.34377		8	8	7	18.9	18.9	16.3	39.586	27.369	93761000	118	4	5	6	4	5	4	4	5	6	4	5	4	3	4	5	3	4	3	12.8	14.2	14.8
Q13509;A0A0B4J269	Tubulin beta-3 chain	TUBB3	23.5634	23.6827	23.623	24.4647	23.9586	24.2117	22.6827	25.3846	24.0337	-0.58862	-0.17799	-0.41063	0.664979	0.883934	0.752295		26	13	10	67.3	42	38	50.432	205.23	122270000	152	18	13	12	17	18	25	7	4	3	6	7	13	4	1	1	3	5	10	42	30.7	28.7
P43686	26S protease regulatory subunit 6B	PSMC4	24.7868	23.6267	24.2067	24.7378	24.1519	24.4449	22.9336	24.2657	23.5996	-0.23813	-0.84522	0.60709	0.847844	0.556626	1.52318		26	26	26	73.4	73.4	73.4	47.366	121.98	165730000	91	12	5	9	8	7	12	12	5	9	8	7	12	12	5	9	8	7	12	32.1	11.5	22.7
P55036;A2A3N6	26S proteasome non-ATPase regulatory subunit 4	PSMD4	24.5787	22.4812	23.5299	24.2881	23.4094	23.8487	21.2402	24.1404	22.6903	-0.318785	-1.15844	0.839655	0.801745	0.447997	1.78962		14	14	14	45.4	45.4	45.4	40.736	255.88	134370000	94	11	5	10	5	3	8	11	5	10	5	3	8	11	5	10	5	3	8	35.5	18.3	32.9
Q9NR45	Sialic acid synthase	NANS	22.0756	23.8405	22.958	23.6148	23.6296	23.6222	24.6595	24.9459	24.8027	-0.66416	1.18051	-1.84468	0.631056	2.26658	0.278418		16	16	16	64.1	64.1	64.1	40.307	152.24	100820000	118	5	5	6	7	11	12	5	5	6	7	11	12	5	5	6	7	11	12	17.8	18.7	21.2
O43684	Mitotic checkpoint protein BUB3	BUB3	21.1928	23.2936	22.2432	23.8866	23.7407	23.8136	23.8478	23.515	23.6814	-1.57043	-0.13227	-1.43816	0.336709	0.912395	0.369039		11	11	11	39	39	39	37.154	75.351	77515000	90	4	7	8	7	11	8	4	7	8	7	11	8	4	7	8	7	11	8	15.2	23.8	26.8
Q15257	Serine/threonine-protein phosphatase 2A activator	PPP2R4	21.7917	23.9155	22.8536	24.0914	24.3275	24.2094	24.2569	23.5484	23.9027	-1.35583	-0.306765	-1.04907	0.39071	0.808453	0.483281		11	11	11	47.5	47.5	47.5	40.667	81.281	90412000	142	6	6	5	5	10	9	6	6	5	5	10	9	6	6	5	5	10	9	21.8	20.7	17.9
Q9UM54	Unconventional myosin-VI	MYO6	22.9343	22.9218	22.9281	24.1823	23.8549	24.0186	24.1328	23.8737	24.0033	-1.09054	-0.015345	-1.0752	0.469584	0.98942	0.474605	+	52	52	52	47.3	47.3	47.3	149.69	323.31	95683000	195	13	12	22	20	39	28	13	12	22	20	39	28	13	12	22	20	39	28	11.3	10	16.9
Q9NR31	GTP-binding protein SAR1a	SAR1A	22.5557	22.5218	22.5388	23.4759	23.6258	23.5509	24.4751	24.3305	24.4028	-1.0121	0.851945	-1.86404	0.495824	1.80493	0.274705	+	11	11	8	58.1	58.1	42.9	22.367	32.897	32946000	59	3	3	3	2	8	6	3	3	3	2	8	6	2	1	1	1	5	4	17.2	15.7	15.7
Q15029	116 kDa U5 small nuclear ribonucleoprotein component	EFTUD2	22.2995	22.3042	22.3019	23.9628	23.8694	23.9161	24.3899	23.852	24.1209	-1.61423	0.204835	-1.81906	0.326639	1.15255	0.283405	+	41	40	40	54.6	53.6	53.6	109.43	323.31	92010000	185	13	9	18	16	35	26	12	8	17	15	34	25	12	8	17	15	34	25	13.8	9.7	20.3
O43143;Q14562	Pre-mRNA-splicing factor ATP-dependent RNA helicase DHX15	DHX15	22.7278	22.4082	22.568	23.6015	24.3749	23.9882	24.592	24.2554	24.4237	-1.42023	0.435455	-1.85569	0.373653	1.35234	0.276301		30	30	29	45	45	43.9	90.932	191.87	110750000	180	15	8	12	12	21	21	15	8	12	12	21	21	14	8	11	12	21	21	20.4	11.1	16
P23246	Splicing factor, proline- and glutamine-rich	SFPQ	22.2052	21.6197	21.9124	23.2516	24.0423	23.647	24.3273	24.235	24.2812	-1.73452	0.634195	-2.36872	0.300508	1.55207	0.193617		23	23	22	34.1	34.1	33	76.149	139.09	91207000	106	5	5	8	6	16	15	5	5	8	6	16	15	5	4	7	5	15	14	10.2	8.8	13.7
Q96HE7;Q86YB8	ERO1-like protein alpha	ERO1L	24.0857	24.9953	24.5405	23.5829	24.164	23.8735	22.1822	22.3596	22.2709	0.66706	-1.60258	2.26964	1.58783	0.329288	4.82203		18	18	18	52.1	52.1	52.1	54.392	275.55	123190000	99	11	11	11	9	7	6	11	11	11	9	7	6	11	11	11	9	7	6	28.4	26.5	27.6
P10155	60 kDa SS-A/Ro ribonucleoprotein	TROVE2	24.4293	24.2573	24.3433	23.55	23.734	23.642	23.3123	22.4856	22.899	0.701305	-0.743045	1.44435	1.62597	0.597477	2.7214	+	17	17	17	41.3	41.3	41.3	60.67	88.509	115740000	76	11	10	8	6	10	7	11	10	8	6	10	7	11	10	8	6	10	7	28.3	22.3	18
O75396	Vesicle-trafficking protein SEC22b	SEC22B	24.0794	24.1684	24.1239	23.7089	24.1453	23.9271	22.7257	22.5597	22.6427	0.196785	-1.28439	1.48118	1.14614	0.410544	2.79176		11	11	11	47.9	47.9	47.9	24.593	142.94	28646000	89	4	3	3	4	10	8	4	3	3	4	10	8	4	3	3	4	10	8	21.9	18.1	13.5
O75608	Acyl-protein thioesterase 1	LYPLA1	24.4702	23.8507	24.1604	24.5692	23.1375	23.8534	23.3628	21.9885	22.6756	0.307085	-1.17774	1.48482	1.23721	0.442045	2.79882		8	8	8	57.8	57.8	57.8	24.669	21.164	44449000	34	3	2	3	2	4	6	3	2	3	2	4	6	3	2	3	2	4	6	13.9	8.3	13.9
Q9UL25	Ras-related protein Rab-21	RAB21	23.3152	23.8612	23.5882	22.5153	22.979	22.7472	23.6128	23.3741	23.4935	0.841025	0.74629	0.094735	1.79132	1.67747	1.06787		11	11	11	51.6	51.6	51.6	24.347	85.338	29202000	85	5	2	3	4	10	9	5	2	3	4	10	9	5	2	3	4	10	9	31.1	9.3	15.1
Q99613;B5ME19	Eukaryotic translation initiation factor 3 subunit C;Eukaryotic translation initiation factor 3 subunit C-like protein	EIF3C;EIF3CL	23.3489	23.3856	23.3673	22.9206	23.2095	23.0651	22.9638	23.5007	23.2322	0.30221	0.167155	0.135055	1.23303	1.12284	1.09813		23	23	23	23.7	23.7	23.7	105.34	304.98	82865000	147	12	10	9	9	16	15	12	10	9	9	16	15	12	10	9	9	16	15	13.1	12.3	11.6
Q92900	Regulator of nonsense transcripts 1	UPF1	23.3374	23.0464	23.1919	22.6491	23.4492	23.0492	23.3274	22.4651	22.8963	0.14274	-0.15293	0.29567	1.104	0.899422	1.22745		42	42	42	42.4	42.4	42.4	124.34	208.03	79769000	169	16	13	12	14	35	22	16	13	12	14	35	22	16	13	12	14	35	22	16.9	13.5	12.5
Q00765	Receptor expression-enhancing protein 5	REEP5	23.5836	23.4736	23.5286	22.8672	23.4059	23.1365	22.9223	22.9158	22.9191	0.392045	-0.21748	0.609525	1.31225	0.860066	1.52576		6	6	6	27.5	27.5	27.5	21.493	28.687	29446000	67	4	3	4	2	5	3	4	3	4	2	5	3	4	3	4	2	5	3	15.9	15.3	15.9
P52434	DNA-directed RNA polymerases I, II, and III subunit RPABC3	POLR2H	23.258	23.431	23.3445	21.654	23.5116	22.5828	23.2011	22.5989	22.9	0.761675	0.31722	0.444455	1.69546	1.24593	1.3608		5	5	5	37.3	37.3	37.3	17.143	59.965	15841000	51	3	3	3	3	5	4	3	3	3	3	5	4	3	3	3	3	5	4	18	18	18
P19105;O14950;P24844	Myosin regulatory light chain 12A;Myosin regulatory light chain 12B;Myosin regulatory light polypeptide 9	MYL12A;MYL12B;MYL9	24.4034	22.9253	23.6644	21.7643	23.7816	22.7729	23.6087	22.7581	23.1834	0.89142	0.41049	0.48093	1.855	1.32914	1.39564		9	9	9	62.6	62.6	62.6	19.794	201.45	26730000	75	5	4	2	5	9	8	5	4	2	5	9	8	5	4	2	5	9	8	29.8	23.4	12.3
P29762	Cellular retinoic acid-binding protein 1	CRABP1	23.2544	23.6075	23.4309	21.3612	23.2744	22.3178	23.1041	23.4351	23.2696	1.11312	0.951745	0.161375	2.16313	1.93421	1.11835		10	9	9	69.3	64.2	64.2	15.565	44.533	14386000	48	6	5	4	6	8	8	5	4	3	5	7	7	5	4	3	5	7	7	36.5	35.8	28.5
Q92696	Geranylgeranyl transferase type-2 subunit alpha	RABGGTA	23.3072	24.0326	23.6699	22.4613	23.1509	22.8061	23.3661	22.3738	22.87	0.863745	0.063855	0.79989	1.81976	1.04526	1.74097		22	22	22	48	48	48	65.071	113.28	71990000	70	9	11	9	9	12	9	9	11	9	9	12	9	9	11	9	9	12	9	17.1	19.9	16
P62140	Serine/threonine-protein phosphatase PP1-beta catalytic subunit	PPP1CB	23.9922	23.7501	23.8712	23.2145	23.0603	23.1374	23.3604	22.0758	22.7181	0.73377	-0.419315	1.15308	1.66298	0.74778	2.22389	+	22	7	7	62.7	26.6	26.6	37.186	34.365	75860000	59	9	5	8	10	20	14	3	3	4	3	7	5	3	3	4	3	7	5	25.4	17.4	24.5
Q16629	Serine/arginine-rich splicing factor 7	SRSF7	23.7366	24.0051	23.8708	22.5771	23.5617	23.0694	23.2419	21.8862	22.5641	0.8014	-0.50535	1.30675	1.74279	0.704489	2.47384		6	6	5	23.5	23.5	23.5	27.366	27.428	26967000	82	3	2	2	3	5	4	3	2	2	3	5	4	3	2	2	3	4	3	12.6	8.8	8.8
Q9Y3A5	Ribosome maturation protein SBDS	SBDS	23.2568	23.4221	23.3395	22.8034	23.6858	23.2446	22.9264	23.8938	23.4101	0.094875	0.16552	-0.070645	1.06797	1.12157	0.952212		16	16	16	61.2	61.2	61.2	28.763	59.251	49530000	62	4	4	5	4	8	8	4	4	5	4	8	8	4	4	5	4	8	8	16.8	14.8	25.2
P30740;O75830	Leukocyte elastase inhibitor	SERPINB1	23.2832	24.234	23.7586	23.3856	23.5823	23.484	22.4922	23.9422	23.2172	0.274645	-0.266805	0.54145	1.2097	0.831158	1.45543		20	20	19	50.4	50.4	47.8	42.741	112.77	109120000	85	9	11	8	8	8	11	9	11	8	8	8	11	9	11	8	8	7	10	25.6	31.9	24.5
Q8WW59	SPRY domain-containing protein 4	SPRYD4	23.0037	24.3461	23.6749	22.6021	23.9136	23.2579	22.5892	23.3009	22.9451	0.417015	-0.312795	0.72981	1.33516	0.805081	1.65842		11	11	11	57.5	57.5	57.5	23.128	23.831	28257000	55	5	7	4	6	6	2	5	7	4	6	6	2	5	7	4	6	6	2	24.2	31.9	19.3
Q9Y696	Chloride intracellular channel protein 4	CLIC4	24.2321	23.5299	23.881	24.179	23.4091	23.7941	22.9005	23.1981	23.0493	0.08695	-0.744815	0.831765	1.06212	0.596744	1.77986		9	9	8	56.1	56.1	53	28.772	77.368	83016000	54	3	3	6	5	8	7	3	3	6	5	8	7	3	3	6	5	8	6	14.2	14.2	36.4
Q9UBQ7	Glyoxylate reductase/hydroxypyruvate reductase	GRHPR	23.4065	23.5575	23.482	23.4285	23.8268	23.6277	23.0783	23.5356	23.307	-0.145625	-0.320705	0.17508	0.903988	0.800679	1.12903		12	12	12	57	57	57	35.668	129.99	72291000	63	7	4	4	5	11	8	7	4	4	5	11	8	7	4	4	5	11	8	25.9	14.9	14.9
Q9NPH2	Inositol-3-phosphate synthase 1	ISYNA1	23.3291	23.3798	23.3545	23.4405	23.7951	23.6178	23.1607	23.3715	23.2661	-0.26335	-0.35171	0.08836	0.833151	0.783655	1.06316		12	12	12	31.2	31.2	31.2	61.067	86.271	93327000	86	9	7	7	7	9	7	9	7	7	7	9	7	9	7	7	7	9	7	26.3	14.5	17.9
Q96IU4	Alpha/beta hydrolase domain-containing protein 14B	ABHD14B	23.345	23.4303	23.3877	23.9449	23.7397	23.8423	23.0001	23.6693	23.3347	-0.454615	-0.507605	0.05299	0.729705	0.703389	1.03741		7	7	7	44.3	44.3	44.3	22.345	50.148	34367000	38	4	2	3	3	7	6	4	2	3	3	7	6	4	2	3	3	7	6	22.4	9.5	16.2
Q5T4S7	E3 ubiquitin-protein ligase UBR4	UBR4	23.4902	23.8281	23.6592	23.286	23.4278	23.3569	23.3526	23.159	23.2558	0.30227	-0.101085	0.403355	1.23308	0.932332	1.32258		90	90	90	23.1	23.1	23.1	573.83	323.31	88803000	284	31	33	18	21	57	47	31	33	18	21	57	47	31	33	18	21	57	47	7.9	8.4	5.1
Q10567	AP-1 complex subunit beta-1	AP1B1	23.4859	24.0719	23.7789	23.7348	23.7098	23.7223	23.138	23.2954	23.2167	0.056635	-0.50555	0.562185	1.04004	0.704392	1.4765		37	19	19	44.9	25.7	25.7	104.64	124.33	98881000	123	22	14	13	14	24	28	10	7	5	6	11	12	10	7	5	6	11	12	27.8	16.1	15.1
Q01650;Q9UM01;Q92536	Large neutral amino acids transporter small subunit 1	SLC7A5	23.4569	23.7489	23.6029	23.4701	23.0228	23.2465	22.8624	23.0578	22.9601	0.356425	-0.28635	0.642775	1.28025	0.819974	1.56133		7	7	7	15.6	15.6	15.6	55.01	105.89	71101000	106	5	5	4	2	3	4	5	5	4	2	3	4	5	5	4	2	3	4	11.8	12.6	11.2
P31942	Heterogeneous nuclear ribonucleoprotein H3	HNRNPH3	23.4005	23.5406	23.4706	23.2405	24.1269	23.6837	23.355	22.751	23.053	-0.213115	-0.630705	0.41759	0.862673	0.645861	1.33569		6	6	6	24	24	24	36.926	96.918	25630000	52	2	2	2	2	6	6	2	2	2	2	6	6	2	2	2	2	6	6	6.1	6.1	6.1
P23921	Ribonucleoside-diphosphate reductase large subunit	RRM1	23.5651	23.3968	23.4809	23.3481	23.7528	23.5505	23.1417	22.7494	22.9455	-0.069515	-0.604925	0.53541	0.952958	0.657506	1.44935		22	22	22	32.3	32.3	32.3	90.069	126.79	90252000	122	12	9	8	9	8	12	12	9	8	9	8	12	12	9	8	9	8	12	16.4	13.5	10.7
P02786;Q9UP52	Transferrin receptor protein 1;Transferrin receptor protein 1, serum form	TFRC	23.4692	23.5112	23.4902	23.0042	23.377	23.1906	22.9284	23.3122	23.1203	0.299635	-0.070305	0.36994	1.23083	0.952437	1.2923		25	25	25	40	40	40	84.87	134.69	81888000	153	13	11	13	14	14	13	13	11	13	14	14	13	13	11	13	14	14	13	19.7	16.2	19.7
O95716	Ras-related protein Rab-3D	RAB3D	23.4671	23.8914	23.6793	23.8936	23.4745	23.684	22.8964	23.4651	23.1808	-0.00473	-0.503235	0.498505	0.996727	0.705523	1.41275		9	9	5	49.3	49.3	30.1	24.267	42.696	33956000	69	6	5	5	5	6	3	6	5	5	5	6	3	3	2	2	2	3	2	28.3	21	21
A6NDG6	Phosphoglycolate phosphatase	PGP	23.447	23.9014	23.6742	23.6483	23.378	23.5132	22.7495	22.7014	22.7255	0.16103	-0.78769	0.94872	1.11809	0.579271	1.93016		9	9	9	44.5	44.5	44.5	34.006	127.15	73343000	55	7	3	4	2	8	5	7	3	4	2	8	5	7	3	4	2	8	5	29.6	10.9	15
O14744	Protein arginine N-methyltransferase 5;Protein arginine N-methyltransferase 5, N-terminally processed	PRMT5	23.4153	23.9119	23.6636	23.7967	23.8949	23.8458	23.1779	23.1929	23.1854	-0.182185	-0.660375	0.47819	0.881367	0.632714	1.39299		19	19	19	34.2	34.2	34.2	72.683	64.764	103640000	104	12	11	7	9	8	11	12	11	7	9	8	11	12	11	7	9	8	11	23.1	20.9	12.1
Q9HB07	UPF0160 protein MYG1, mitochondrial	C12orf10	23.2482	24.5508	23.8995	23.5673	23.9128	23.7401	23.8793	22.8649	23.3721	0.15945	-0.36794	0.52739	1.11686	0.774888	1.44132		12	12	12	43.1	43.1	43.1	42.449	108.26	80979000	73	7	6	6	8	7	5	7	6	6	8	7	5	7	6	6	8	7	5	23.9	19.1	16.5
Q9H2U2	Inorganic pyrophosphatase 2, mitochondrial	PPA2	23.4228	25.0237	24.2232	23.5651	24.4683	24.0167	22.7498	22.6389	22.6944	0.20652	-1.32236	1.52888	1.1539	0.399879	2.88563		11	11	11	44.6	44.6	44.6	37.92	113.13	99788000	96	6	4	5	4	9	8	6	4	5	4	9	8	6	4	5	4	9	8	24	15.6	18.9
Q07955	Serine/arginine-rich splicing factor 1	SRSF1	23.0322	23.9475	23.4899	23.9004	23.7816	23.841	23.7103	22.3349	23.0226	-0.351115	-0.81839	0.467275	0.783978	0.567074	1.3825		11	11	11	44.4	44.4	44.4	27.744	38.202	72509000	112	3	4	8	8	9	5	3	4	8	8	9	5	3	4	8	8	9	5	12.9	16.1	28.6
P62633	Cellular nucleic acid-binding protein	CNBP	21.8189	24.2227	23.0208	23.831	23.9889	23.91	23.4575	22.8687	23.1631	-0.889145	-0.74689	-0.142255	0.539934	0.595887	0.906102		7	7	7	44.6	44.6	44.6	19.463	153.04	25108000	73	3	3	3	5	5	4	3	3	3	5	5	4	3	3	3	5	5	4	23.2	16.9	16.9
P52788	Spermine synthase	SMS	22.5876	23.6993	23.1435	23.265	23.7183	23.4916	22.9818	22.8825	22.9321	-0.34815	-0.559485	0.211335	0.785591	0.678544	1.15776		16	16	16	45.1	45.1	45.1	41.268	50.26	81021000	51	2	4	5	6	6	10	2	4	5	6	6	10	2	4	5	6	6	10	4.6	13.4	12.6
O15305	Phosphomannomutase 2	PMM2	22.883	24.2368	23.5599	23.431	24.4942	23.9626	22.9183	22.9566	22.9375	-0.402725	-1.02512	0.6224	0.756428	0.491368	1.53943		6	6	5	25.2	25.2	22.4	28.082	24.87	68851000	41	4	4	5	4	3	4	4	4	5	4	3	4	4	3	4	3	3	3	17.1	17.5	19.9
P12532;P17540	Creatine kinase U-type, mitochondrial	CKMT1A	23.5732	24.4211	23.9972	23.6097	24.6959	24.1528	22.7013	22.7255	22.7134	-0.155645	-1.43942	1.28377	0.897731	0.368716	2.43475		11	11	11	36	36	36	47.036	262.91	130370000	81	6	6	7	5	6	4	6	6	7	5	6	4	6	6	7	5	6	4	19.4	16.5	20.4
Q9Y4L1	Hypoxia up-regulated protein 1	HYOU1	23.5676	23.3856	23.4766	25.2919	24.5581	24.925	24.5201	22.9631	23.7416	-1.44844	-1.18341	-0.265035	0.366416	0.44031	0.832179		42	42	41	51.3	51.3	50.6	111.33	323.31	161490000	207	16	10	28	19	34	16	16	10	28	19	34	16	15	9	27	19	33	15	19.1	11.3	30.1
P50213	Isocitrate dehydrogenase [NAD] subunit alpha, mitochondrial	IDH3A	22.9512	23.6091	23.2801	24.9063	24.1969	24.5516	24.143	22.8268	23.4849	-1.27145	-1.06667	-0.20479	0.414242	0.477421	0.867665		16	16	16	47.5	47.5	47.5	39.591	64.975	105810000	100	8	7	10	11	9	9	8	7	10	11	9	9	8	7	10	11	9	9	21.3	18.6	26.5
P35221;Q9UI47	Catenin alpha-1	CTNNA1	23.3577	23.7667	23.5622	24.3859	24.1346	24.2603	24.137	23.2518	23.6944	-0.698085	-0.565835	-0.13225	0.61639	0.675564	0.912407		29	29	23	47.8	47.8	39.6	100.07	323.31	122410000	154	15	6	14	12	18	15	15	6	14	12	18	15	10	5	10	9	14	12	21.4	8.9	18.3
P38919	Eukaryotic initiation factor 4A-III;Eukaryotic initiation factor 4A-III, N-terminally processed	EIF4A3	23.4441	23.3359	23.39	24.3558	24.628	24.4919	23.9953	23.5304	23.7629	-1.10189	-0.72901	-0.37288	0.465906	0.603318	0.772239	+	19	16	16	43.6	37.7	37.7	46.871	130.06	145790000	117	15	9	10	12	12	9	12	7	7	9	10	7	12	7	7	9	10	7	33.3	20.7	22.6
Q9UBT2	SUMO-activating enzyme subunit 2	UBA2	23.2411	23.3449	23.293	24.3198	23.9643	24.142	23.0729	22.9438	23.0084	-0.849025	-1.13366	0.28464	0.55516	0.455756	1.21811	+	23	23	23	44.7	44.7	44.7	71.223	94.327	93893000	88	15	4	7	5	17	9	15	4	7	5	17	9	15	4	7	5	17	9	32	6.4	11.9
Q15126	Phosphomevalonate kinase	PMVK	23.0014	23.2973	23.1493	24.2715	23.123	23.6973	23.7506	23.3354	23.543	-0.547955	-0.154265	-0.39369	0.683989	0.89859	0.76118		13	13	13	64.6	64.6	64.6	21.995	46.733	29010000	66	9	3	3	5	8	8	9	3	3	5	8	8	9	3	3	5	8	8	45.8	14.6	14.6
P25205	DNA replication licensing factor MCM3	MCM3	22.814	23.3137	23.0639	24.276	23.6843	23.9801	23.543	23.1613	23.3521	-0.916295	-0.628	-0.288295	0.529868	0.647073	0.818869		30	30	30	44.1	44.1	44.1	90.98	323.31	85789000	144	15	8	14	11	25	16	15	8	14	11	25	16	15	8	14	11	25	16	20.3	11.6	18.3
P61758	Prefoldin subunit 3	VBP1	23.4594	22.9645	23.212	24.7194	23.7573	24.2384	23.0909	22.6899	22.8904	-1.02642	-1.34801	0.32159	0.490929	0.392835	1.24971		9	9	9	42.6	42.6	42.6	22.658	21.939	39218000	63	4	3	6	6	4	6	4	3	6	6	4	6	4	3	6	6	4	6	18.3	14.7	26.9
Q9HCC0	Methylcrotonoyl-CoA carboxylase beta chain, mitochondrial	MCCC2	23.3939	23.1649	23.2794	24.9213	24.2253	24.5733	23.2071	23.1761	23.1916	-1.29393	-1.38171	0.08778	0.407837	0.383762	1.06273		21	21	21	48.1	48.1	48.1	61.332	115.7	128880000	172	16	10	13	14	10	9	16	10	13	14	10	9	16	10	13	14	10	9	35.7	21.1	27.5
P52272	Heterogeneous nuclear ribonucleoprotein M	HNRNPM	23.0108	23.1714	23.0911	24.9789	23.9785	24.4787	23.5221	23.3632	23.4426	-1.38766	-1.0361	-0.35156	0.382186	0.487646	0.783736		15	15	15	25.2	25.2	25.2	77.515	69.432	59350000	133	3	3	8	5	9	11	3	3	8	5	9	11	3	3	8	5	9	11	4.5	4.2	12.1
P41240;P42679	Tyrosine-protein kinase CSK	CSK	23.2234	22.881	23.0522	24.2122	24.2595	24.2359	22.9906	23.4857	23.2381	-1.18367	-0.997745	-0.18592	0.440232	0.500782	0.879088	+	18	18	18	47.3	47.3	47.3	50.704	135.85	102570000	109	13	8	8	11	10	9	13	8	8	11	10	9	13	8	8	11	10	9	36	20.9	19.6
O00571;O15523;Q9NQI0	ATP-dependent RNA helicase DDX3X;ATP-dependent RNA helicase DDX3Y	DDX3X;DDX3Y	23.277	22.9566	23.1168	24.4227	24.2864	24.3545	23.6266	23.948	23.7873	-1.23777	-0.567275	-0.67049	0.424029	0.67489	0.628293	+	25	24	24	45.2	43.5	43.5	73.243	215.87	97958000	157	14	8	13	13	18	19	13	8	12	12	18	18	13	8	12	12	18	18	27.6	14.2	23
P20042	Eukaryotic translation initiation factor 2 subunit 2	EIF2S2	23.6096	23.1625	23.3861	24.7404	23.5978	24.1691	23.0694	24.2544	23.6619	-0.78299	-0.507175	-0.275815	0.581161	0.703599	0.825984		9	9	9	30	30	30	38.388	88.495	65250000	99	8	5	7	7	3	9	8	5	7	7	3	9	8	5	7	7	3	9	29.1	15	25.5
Q9Y266	Nuclear migration protein nudC	NUDC	23.9546	24.5237	24.2391	24.6268	24.6564	24.6416	23.9054	23.7119	23.8087	-0.402495	-0.832975	0.43048	0.756549	0.56137	1.34768		16	16	16	55.3	55.3	55.3	38.242	93.653	143250000	125	9	10	11	8	4	8	9	10	11	8	4	8	9	10	11	8	4	8	28.4	32.3	33.2
Q13085;O00763	Acetyl-CoA carboxylase 1;Biotin carboxylase	ACACA	23.4568	24.5735	24.0151	25.1687	25.9601	25.5644	23.8248	24.1136	23.9692	-1.54928	-1.59523	0.04595	0.341682	0.330971	1.03236		52	52	52	29.8	29.8	29.8	265.55	199.64	177800000	143	11	11	10	8	35	33	11	11	10	8	35	33	11	11	10	8	35	33	5.2	5.1	5.5
P78527	DNA-dependent protein kinase catalytic subunit	PRKDC	23.9524	24.2021	24.0773	25.0809	25.2147	25.1478	23.9172	23.6778	23.7975	-1.07052	-1.35033	0.2798	0.476146	0.392204	1.21403	+	103	103	103	29.7	29.7	29.7	469.08	323.31	198860000	397	32	26	42	42	67	52	32	26	42	42	67	52	32	26	42	42	67	52	8.7	7.3	11.3
P49736	DNA replication licensing factor MCM2	MCM2	24.27	23.5985	23.9343	24.7543	25.0513	24.9028	23.3748	23.5278	23.4513	-0.968535	-1.45152	0.482985	0.511025	0.365636	1.39763		27	27	27	36.1	36.1	36.1	101.89	206.94	181200000	206	16	10	16	18	17	11	16	10	16	18	17	11	16	10	16	18	17	11	21.6	13.6	22.3
O43175	D-3-phosphoglycerate dehydrogenase	PHGDH	23.8605	23.6153	23.7379	25.2899	25.1522	25.221	23.753	24.2023	23.9776	-1.48315	-1.24339	-0.23976	0.357707	0.422379	0.846886	+	18	18	18	43.7	43.7	43.7	56.65	181.58	195910000	176	12	8	13	9	13	15	12	8	13	9	13	15	12	8	13	9	13	15	29.3	17.4	31.7
P27695	DNA-(apurinic or apyrimidinic site) lyase;DNA-(apurinic or apyrimidinic site) lyase, mitochondrial	APEX1	24.2942	24.2694	24.2818	24.1944	25.1056	24.65	23.9264	24.001	23.9637	-0.368235	-0.68632	0.318085	0.77473	0.621437	1.24667		18	18	18	59.7	59.7	59.7	35.554	206.28	141880000	101	8	4	4	8	13	12	8	4	4	8	13	12	8	4	4	8	13	12	26.7	15.7	16.7
Q96QK1	Vacuolar protein sorting-associated protein 35	VPS35	24.7346	24.219	24.4768	24.3443	23.9167	24.1305	23.9844	23.3515	23.668	0.346325	-0.462525	0.80885	1.27132	0.725715	1.75181		34	34	34	47.4	47.4	47.4	91.706	301.57	168890000	144	18	11	13	9	24	15	18	11	13	9	24	15	18	11	13	9	24	15	25.8	16.7	17.3
Q16555;Q14195;Q14194	Dihydropyrimidinase-related protein 2	DPYSL2	24.4504	24.6682	24.5593	24.5174	23.948	24.2327	23.1797	23.2973	23.2385	0.32665	-0.994215	1.32087	1.2541	0.502009	2.49816		21	21	21	56.3	56.3	56.3	62.293	323.31	149520000	117	14	10	13	11	13	12	14	10	13	11	13	12	14	10	13	11	13	12	35	21.3	29.5
P14923	Junction plakoglobin	JUP	24.3547	24.5132	24.4339	25.1611	23.6619	24.4115	23.0975	23.1445	23.121	0.02245	-1.29046	1.31291	1.01568	0.408821	2.48442		23	23	20	38.3	38.3	34.2	81.744	95.625	132380000	308	19	12	16	8	10	11	19	12	16	8	10	11	16	9	14	7	10	10	29.9	16.9	22.8
P02545	Prelamin-A/C;Lamin-A/C	LMNA	24.4111	24.223	24.317	24.9378	23.774	24.3559	23.5746	23.0094	23.292	-0.03887	-1.06391	1.02503	0.973417	0.478336	2.03501		30	30	29	49.7	49.7	48.5	74.139	178.43	122780000	191	17	6	19	11	16	13	17	6	19	11	16	13	16	6	19	11	15	12	28	10.5	34.9
P07954	Fumarate hydratase, mitochondrial	FH	24.6425	23.9952	24.3188	24.3279	23.8463	24.0871	23.5866	23.6402	23.6134	0.23171	-0.473735	0.705445	1.17423	0.720098	1.63065		14	14	14	34.5	34.5	34.5	54.636	242.43	187340000	124	11	8	9	7	5	5	11	8	9	7	5	5	11	8	9	7	5	5	27.1	23.7	24.9
Q9UJ70	N-acetyl-D-glucosamine kinase	NAGK	24.1346	24.1528	24.1437	23.7694	24.6216	24.1955	23.0744	23.4193	23.2468	-0.051785	-0.948665	0.89688	0.964742	0.518112	1.86203		14	14	14	50	50	50	37.375	183.81	98909000	105	9	6	9	9	8	10	9	6	9	9	8	10	9	6	9	9	8	10	25.6	18.6	25.6
Q9NZM1;O75923	Myoferlin	MYOF	23.6822	24.2583	23.9702	24.4245	24.4024	24.4134	22.9332	23.0023	22.9677	-0.44323	-1.44571	1.00248	0.735486	0.367111	2.00344		70	70	70	42.6	42.6	42.6	234.71	318.77	127770000	290	27	25	32	34	31	36	27	25	32	34	31	36	27	25	32	34	31	36	17.4	14.3	18.2
P53602	Diphosphomevalonate decarboxylase	MVD	23.817	24.6807	24.2489	24.355	24.8592	24.6071	23.2624	23.9683	23.6153	-0.358235	-0.991765	0.63353	0.780118	0.502862	1.55136		18	18	18	66.2	66.2	66.2	43.404	76.962	155800000	123	7	5	6	5	11	13	7	5	6	5	11	13	7	5	6	5	11	13	20.2	13.8	17.2
P51659	Peroxisomal multifunctional enzyme type 2;(3R)-hydroxyacyl-CoA dehydrogenase;Enoyl-CoA hydratase 2	HSD17B4	23.7164	23.735	23.7257	24.5499	24.8234	24.6867	22.7288	23.0408	22.8848	-0.960955	-1.80186	0.8409	0.513717	0.286806	1.79117	+	20	20	20	40.8	40.8	40.8	79.685	167.27	107050000	163	12	8	13	11	13	10	12	8	13	11	13	10	12	8	13	11	13	10	20.8	13.2	22.8
A0AVT1	Ubiquitin-like modifier-activating enzyme 6	UBA6	23.7689	24.0942	23.9315	24.06	24.5938	24.3269	23.0173	23.7972	23.4073	-0.395385	-0.91967	0.524285	0.760286	0.52863	1.43822		35	35	35	39.6	39.6	39.6	117.97	284.15	130980000	175	16	14	18	18	29	18	16	14	18	18	29	18	16	14	18	18	29	18	16.5	14.2	19.2
P40939	Trifunctional enzyme subunit alpha, mitochondrial;Long-chain enoyl-CoA hydratase;Long chain 3-hydroxyacyl-CoA dehydrogenase	HADHA	23.539	24.0352	23.7871	25.3075	24.5913	24.9494	22.2685	23.0209	22.6447	-1.1623	-2.30467	1.14237	0.446798	0.202406	2.20743		25	25	25	45.3	45.3	45.3	82.999	323.31	175070000	167	15	12	13	13	7	12	15	12	13	13	7	12	15	12	13	13	7	12	26.3	19.5	19.8
Q08257	Quinone oxidoreductase	CRYZ	24.6832	24.369	24.5261	24.4681	24.8872	24.6776	23.4086	23.7575	23.583	-0.15154	-1.09461	0.943065	0.900289	0.468264	1.92261		12	12	12	48.3	48.3	48.3	35.206	57.859	162430000	79	8	6	7	7	5	9	8	6	7	7	5	9	8	6	7	7	5	9	26.7	18.5	21.3
P61224;A0A0J9YXB3;A6NIZ1	Ras-related protein Rap-1b;Ras-related protein Rap-1b-like protein	RAP1B	24.7298	24.6569	24.6934	24.4299	24.6276	24.5287	23.188	23.2074	23.1977	0.16463	-1.33103	1.49566	1.12088	0.397484	2.81993		9	8	1	40.8	40.8	7.1	20.825	40.443	53354000	76	6	4	5	4	8	4	5	3	4	3	7	4	1	1	1	1	1	1	25	22.3	24.5
P55263	Adenosine kinase	ADK	24.3936	24.4398	24.4167	24.2798	24.7467	24.5132	23.3437	23.477	23.4104	-0.09656	-1.10289	1.00633	0.93526	0.465585	2.00879		19	19	19	54.7	54.7	54.7	40.545	164.12	200820000	89	12	10	7	10	7	10	12	10	7	10	7	10	12	10	7	10	7	10	31.5	29.6	18
P51858	Hepatoma-derived growth factor	HDGF	24.3287	24.975	24.6518	24.0771	24.981	24.5291	23.2788	23.1907	23.2347	0.12279	-1.29431	1.4171	1.08884	0.407733	2.67047		14	14	14	63.8	63.8	63.8	26.788	69.357	65189000	137	7	4	7	5	11	10	7	4	7	5	11	10	7	4	7	5	11	10	27.9	15.8	37.9
P05023;P13637;P50993;Q13733;P20648;P54707	Sodium/potassium-transporting ATPase subunit alpha-1	ATP1A1	23.9661	24.4992	24.2327	25.0646	25.2507	25.1577	24.0094	22.4022	23.2058	-0.925005	-1.95185	1.02685	0.526679	0.258485	2.03756		24	24	24	28	28	28	112.89	323.31	184770000	292	20	17	21	19	18	8	20	17	21	19	18	8	20	17	21	19	18	8	24.2	20.7	25.1
O43760	Synaptogyrin-2	SYNGR2	24.7545	24.7955	24.775	24.9968	24.6568	24.8268	23.5806	22.8755	23.228	-0.051795	-1.59876	1.54697	0.964735	0.330161	2.92202		4	4	4	16.1	16.1	16.1	24.81	13.612	127640000	84	4	3	4	4	2	4	4	3	4	4	2	4	4	3	4	4	2	4	16.1	12.5	16.1
O95861	3(2),5-bisphosphate nucleotidase 1	BPNT1	24.008	25.0397	24.5238	24.7606	24.8898	24.8252	23.6781	22.8154	23.2468	-0.30132	-1.5784	1.27708	0.81151	0.334853	2.42348		14	14	14	56.5	56.5	56.5	33.392	84.489	134970000	104	7	8	7	10	10	8	7	8	7	10	10	8	7	8	7	10	10	8	25.6	33.1	25.6
Q9Y6E2	Basic leucine zipper and W2 domain-containing protein 2	BZW2	23.9029	24.1304	24.0166	23.9736	23.8888	23.9312	23.4179	23.432	23.4249	0.085415	-0.50627	0.591685	1.06099	0.70404	1.50701		22	22	21	44.6	44.6	43	48.162	225.37	151630000	121	11	12	13	11	10	10	11	12	13	11	10	10	10	12	12	10	9	9	24.3	27.7	27.4
Q9UNE7	E3 ubiquitin-protein ligase CHIP	STUB1	23.8345	24.0371	23.9358	23.9981	23.8128	23.9055	23.7706	23.6032	23.6869	0.03033	-0.218555	0.248885	1.02125	0.859426	1.18829		18	18	18	58.4	58.4	58.4	34.856	127.37	102560000	118	13	9	10	10	10	6	13	9	10	10	10	6	13	9	10	10	10	6	43.6	31	33.7
Q96G03	Phosphoglucomutase-2	PGM2	24.1345	24.0926	24.1136	23.1487	24.1478	23.6483	23.3253	23.5775	23.4514	0.465335	-0.196875	0.66221	1.38064	0.872438	1.5825		25	25	25	41.5	41.5	41.5	68.283	161.29	155320000	91	15	8	8	10	12	11	15	8	8	10	12	11	15	8	8	10	12	11	27.3	15.2	13.7
Q92973	Transportin-1	TNPO1	24.3283	24.3831	24.3557	23.6114	23.8104	23.7109	23.8455	23.81	23.8277	0.64481	0.116815	0.527995	1.56353	1.08434	1.44192	+	26	26	21	36.6	36.6	32	102.35	257.93	121310000	167	13	12	9	14	20	17	13	12	9	14	20	17	11	9	7	11	16	13	17.6	15	10.9
Q15274;C9JCJ5	Nicotinate-nucleotide pyrophosphorylase [carboxylating]	QPRT	24.504	24.1139	24.3089	23.064	23.1443	23.1042	23.6539	24.4022	24.0281	1.20478	0.92391	0.280865	2.30501	1.89725	1.21492	+	8	8	8	35.7	35.7	35.7	30.845	49.113	99160000	77	6	4	4	5	8	7	6	4	4	5	8	7	6	4	4	5	8	7	23.9	15.5	15.8
P63010	AP-2 complex subunit beta	AP2B1	24.3305	24.0701	24.2003	24.2337	23.9654	24.0996	23.8093	23.8786	23.8439	0.100715	-0.255605	0.35632	1.0723	0.837636	1.28016		38	38	20	44	44	24.5	104.55	203.77	164480000	196	19	11	13	12	28	24	19	11	13	12	28	24	7	4	5	4	15	8	23.1	13.2	14.7
P09104;P13929	Gamma-enolase	ENO2	24.0153	24.0675	24.0414	23.9808	24.1127	24.0468	24.0386	23.6184	23.8285	-0.005355	-0.21826	0.212905	0.996295	0.859602	1.15902		17	13	13	53.5	40.3	40.3	47.268	148.42	143090000	63	10	5	6	6	12	11	8	4	5	5	8	8	8	4	5	5	8	8	33.2	14.3	21.4
O43592	Exportin-T	XPOT	24.7263	24.256	24.4912	23.6274	23.6334	23.6304	24.2712	23.4891	23.8802	0.86071	0.2497	0.61101	1.81593	1.18896	1.52733		32	32	32	44.1	44.1	44.1	109.96	323.31	198250000	228	18	15	12	16	24	18	18	15	12	16	24	18	18	15	12	16	24	18	22.3	17.6	13.6
P06737	Glycogen phosphorylase, liver form	PYGL	24.6014	24.1038	24.3526	23.3149	24.0575	23.6862	22.9205	23.8485	23.3845	0.666405	-0.301675	0.96808	1.58711	0.81131	1.95624		38	33	32	43.9	37.8	36.5	97.147	194.07	189430000	215	26	24	19	19	25	16	22	20	15	16	20	14	21	20	15	15	19	13	31.1	31.9	26.6
Q14019	Coactosin-like protein	COTL1	24.602	24.4009	24.5015	23.9722	23.893	23.9326	23.8932	24.0972	23.9952	0.568865	0.06261	0.506255	1.48336	1.04435	1.42036	+	10	10	10	75.4	75.4	75.4	15.945	24.684	28731000	68	5	4	2	3	6	9	5	4	2	3	6	9	5	4	2	3	6	9	30.3	25.4	13.4
Q12792	Twinfilin-1	TWF1	24.1427	24.3481	24.2454	23.4182	24.2291	23.8236	24.3666	24.816	24.5913	0.421765	0.76767	-0.345905	1.33957	1.70252	0.786814		14	14	11	52	52	46	40.282	189.9	91895000	106	7	6	5	8	9	8	7	6	5	8	9	8	6	5	4	7	8	8	21.4	17.7	12.3
P52758	Ribonuclease UK114	HRSP12	24.63	24.1814	24.4057	23.7216	23.9712	23.8464	24.0118	24.1361	24.0739	0.55928	0.22753	0.33175	1.47353	1.17083	1.25854		6	6	6	73	73	73	14.494	53.461	28929000	50	3	3	2	3	5	3	3	3	2	3	5	3	3	3	2	3	5	3	27	27	15.3
Q01082;P11277	Spectrin beta chain, non-erythrocytic 1	SPTBN1	24.2929	24.6422	24.4675	23.1918	24.0029	23.5974	24.2136	24.5112	24.3624	0.87018	0.765035	0.105145	1.82789	1.69941	1.0756		87	87	80	50	50	46.6	274.61	323.31	151390000	342	40	37	18	18	56	62	40	37	18	18	56	62	39	37	18	17	51	58	20.3	19.5	9.7
Q86V21	Acetoacetyl-CoA synthetase	AACS	24.1758	24.8616	24.5187	23.7301	24.3351	24.0326	23.3268	23.5599	23.4433	0.48606	-0.5893	1.07536	1.40061	0.664665	2.10725		17	17	17	25.1	25.1	25.1	75.143	177.58	167430000	109	11	15	13	11	9	11	11	15	13	11	9	11	11	15	13	11	9	11	17.6	21.1	18.9
Q6P1N9	Putative deoxyribonuclease TATDN1	TATDN1	23.6766	24.4031	24.0398	23.078	23.9991	23.5386	23.2737	23.5938	23.4337	0.501275	-0.104825	0.6061	1.41546	0.929918	1.52214		11	11	11	41.8	41.8	41.8	33.601	85.444	77899000	66	5	6	7	7	6	5	5	6	7	7	6	5	5	6	7	7	6	5	19.9	22.2	26.6
Q14247	Src substrate cortactin	CTTN	23.5327	25.1003	24.3165	22.9924	24.2164	23.6044	22.8273	23.2794	23.0534	0.712065	-0.551065	1.26313	1.63815	0.682516	2.40016		16	16	16	37.5	37.5	37.5	61.585	158.92	42728000	137	9	7	8	8	6	7	9	7	8	8	6	7	9	7	8	8	6	7	17.1	13.5	18.7
P16930	Fumarylacetoacetase	FAH	24.6438	25.5122	25.078	23.1181	24.0736	23.5958	23.6302	24.1627	23.8965	1.48215	0.30061	1.18154	2.79366	1.23167	2.2682		15	15	15	47.5	47.5	47.5	46.374	136.21	195920000	84	8	5	8	5	12	10	8	5	8	5	12	10	8	5	8	5	12	10	20.3	13.1	20.3
P48444	Coatomer subunit delta	ARCN1	23.5626	24.8223	24.1924	23.0345	23.8159	23.4252	23.6177	23.7216	23.6697	0.767235	0.244495	0.52274	1.702	1.18468	1.43668		20	20	20	35.4	35.4	35.4	57.21	229.25	92410000	142	11	6	10	8	14	12	11	6	10	8	14	12	11	6	10	8	14	12	23.3	13.1	20.4
Q8NEZ5	F-box only protein 22	FBXO22	23.7787	24.2899	24.0343	23.459	23.0533	23.2562	24.4935	22.9513	23.7224	0.778105	0.466255	0.31185	1.71488	1.38152	1.2413		10	10	10	31	31	31	44.508	99.103	37528000	59	5	4	4	8	5	6	5	4	4	8	5	6	5	4	4	8	5	6	13.4	8.9	10.9
Q3LXA3	Bifunctional ATP-dependent dihydroxyacetone kinase/FAD-AMP lyase (cyclizing);ATP-dependent dihydroxyacetone kinase;FAD-AMP lyase (cyclizing)	DAK	23.8991	23.5539	23.7265	23.9704	23.9098	23.9401	24.1611	23.7289	23.945	-0.21355	0.004925	-0.218475	0.862413	1.00342	0.859473		21	21	21	53.7	53.7	53.7	58.946	292.98	121520000	163	14	8	10	11	14	14	14	8	10	11	14	14	14	8	10	11	14	14	38.6	19.5	24.5
P20339	Ras-related protein Rab-5A	RAB5A	23.9855	23.8138	23.8997	23.4442	23.6713	23.5577	24.1877	23.503	23.8453	0.341945	0.287595	0.05435	1.26746	1.2206	1.03839		9	9	6	59.1	59.1	44.2	23.658	67.284	40259000	74	6	3	4	3	7	6	6	3	4	3	7	6	4	1	2	1	4	3	37.7	15.8	22.3
P30085	UMP-CMP kinase	CMPK1	23.8869	23.4988	23.6928	23.309	23.6446	23.4768	24.082	23.3996	23.7408	0.21603	0.264055	-0.048025	1.16153	1.20085	0.96726		11	11	11	63.3	63.3	63.3	22.222	90.34	34154000	111	6	4	3	4	10	9	6	4	3	4	10	9	6	4	3	4	10	9	28.6	21.4	17.3
Q9ULC4	Malignant T-cell-amplified sequence 1	MCTS1	24.6032	23.5314	24.0673	23.5274	23.2583	23.3928	23.3362	23.1655	23.2508	0.67444	-0.141995	0.816435	1.59598	0.906265	1.76105		11	11	11	63.5	63.5	63.5	20.555	63.411	36572000	41	6	2	2	3	7	3	6	2	2	3	7	3	6	2	2	3	7	3	33.7	9.9	6.1
Q99536	Synaptic vesicle membrane protein VAT-1 homolog	VAT1	24.5378	23.5013	24.0196	23.5074	23.0759	23.2916	23.5529	23.0765	23.3147	0.727955	0.02307	0.704885	1.65629	1.01612	1.63001		13	13	13	48.6	48.6	48.6	41.92	105.31	124420000	144	11	7	10	9	5	7	11	7	10	9	5	7	11	7	10	9	5	7	38.2	24.4	33.8
P00568;Q9Y6K8	Adenylate kinase isoenzyme 1	AK1	24.3454	23.3558	23.8506	23.6041	23.805	23.7045	23.7807	23.4202	23.6004	0.146075	-0.10411	0.250185	1.10655	0.930379	1.18936		14	14	14	67.5	67.5	67.5	21.635	51.379	38726000	95	6	7	4	6	9	9	6	7	4	6	9	9	6	7	4	6	9	9	32	30.4	20.6
P51572	B-cell receptor-associated protein 31	BCAP31	24.9059	23.2399	24.0729	24.2935	24.024	24.1588	23.9697	23.4179	23.6938	-0.08588	-0.465015	0.379135	0.94221	0.724464	1.30056		16	16	16	45.9	45.9	45.9	27.991	56.945	89419000	100	8	8	8	7	11	5	8	8	8	7	11	5	8	8	8	7	11	5	22	26.8	24
P51570	Galactokinase	GALK1	23.6812	22.6261	23.1536	23.9621	23.2621	23.6121	24.7368	24.5095	24.6232	-0.458455	1.01107	-1.46953	0.727765	2.01541	0.361101		16	16	16	41.6	41.6	41.6	42.272	163.34	89627000	109	4	3	9	10	12	10	4	3	9	10	12	10	4	3	9	10	12	10	11.7	8.9	27
P15170	Eukaryotic peptide chain release factor GTP-binding subunit ERF3A	GSPT1	23.8671	22.8297	23.3484	23.7497	23.3527	23.5512	24.4407	23.2521	23.8464	-0.2028	0.295185	-0.497985	0.868863	1.22704	0.708095		21	21	9	45.1	45.1	23.4	55.755	73.442	102020000	116	11	5	8	5	15	13	11	5	8	5	15	13	3	1	2	1	6	6	20.6	9.4	15.8
O15143	Actin-related protein 2/3 complex subunit 1B	ARPC1B	23.8027	23.5181	23.6604	23.9675	23.1085	23.538	24.04	23.9015	23.9708	0.12242	0.43277	-0.31035	1.08856	1.34982	0.806446		12	12	11	39.2	39.2	33.1	40.949	78.196	67932000	77	8	5	5	5	10	11	8	5	5	5	10	11	8	5	5	5	9	10	25.5	18	17.2
P14866	Heterogeneous nuclear ribonucleoprotein L	HNRNPL	24.3993	23.2415	23.8204	24.4311	23.1425	23.7868	24.6683	24.2735	24.4709	0.03362	0.68411	-0.65049	1.02358	1.60671	0.637064		20	20	12	60.1	60.1	40.7	64.132	203.76	123650000	114	8	5	11	10	18	13	8	5	11	10	18	13	4	4	5	5	10	6	25.5	12.6	26
Q7KZF4	Staphylococcal nuclease domain-containing protein 1	SND1	23.3777	23.2231	23.3004	23.8789	24.3573	24.1181	24.6907	24.7785	24.7346	-0.8177	0.61651	-1.43421	0.567346	1.53316	0.370049		43	43	43	58	58	58	102	323.31	145160000	212	16	10	18	16	34	32	16	10	18	16	34	32	16	10	18	16	34	32	19.7	11.5	20.8
Q13185	Chromobox protein homolog 3	CBX3	22.7484	23.1895	22.9689	23.8189	24.1781	23.9985	24.6861	24.7184	24.7022	-1.02958	0.70371	-1.73329	0.489851	1.62869	0.300764		8	8	6	52.5	52.5	37.2	20.811	110.39	39792000	101	5	3	4	5	8	7	5	3	4	5	8	7	4	3	3	4	6	5	29	14.2	28.4
O43681	ATPase ASNA1	ASNA1	23.5412	23.8072	23.6742	23.843	23.7071	23.7751	24.5861	24.1535	24.3698	-0.100885	0.59473	-0.695615	0.932461	1.51019	0.617446		14	14	14	45.4	45.4	45.4	38.792	74.579	119800000	81	4	5	4	6	14	10	4	5	4	6	14	10	4	5	4	6	14	10	15.5	17.2	11.2
P04632;Q96L46	Calpain small subunit 1	CAPNS1	22.9396	23.4904	23.215	23.3306	23.602	23.4663	25.1814	25.1698	25.1756	-0.25127	1.70935	-1.96062	0.840157	3.27012	0.256919		11	11	11	63.8	63.8	63.8	28.315	176.1	71030000	110	4	2	4	5	11	10	4	2	4	5	11	10	4	2	4	5	11	10	16.8	8.6	16.8
Q12931	Heat shock protein 75 kDa, mitochondrial	TRAP1	23.2121	23.5472	23.3796	23.7861	24.4721	24.1291	24.1881	24.0694	24.1287	-0.749455	-0.00038	-0.749075	0.594828	0.999737	0.594985		22	22	22	42.3	42.3	42.3	80.109	187	117580000	164	14	11	13	14	9	14	14	11	13	14	9	14	14	11	13	14	9	14	25.1	17.5	20.3
Q08J23	tRNA (cytosine(34)-C(5))-methyltransferase	NSUN2	23.5322	24.1486	23.8404	23.8139	23.9528	23.8834	23.8596	23.7943	23.8269	-0.04293	-0.05641	0.01348	0.970682	0.961654	1.00939		33	33	33	53.2	53.2	53.2	86.47	182.86	116920000	254	20	13	18	14	26	15	20	13	18	14	26	15	20	13	18	14	26	15	31.8	19.2	28.9
O75643	U5 small nuclear ribonucleoprotein 200 kDa helicase	SNRNP200	23.2049	23.4443	23.3246	24.1997	24.3091	24.2544	24.0756	23.9829	24.0293	-0.92981	-0.22513	-0.70468	0.524927	0.855518	0.613579	+	68	68	68	38	38	38	244.5	323.31	114450000	229	17	16	16	16	44	43	17	16	16	16	44	43	17	16	16	16	44	43	8	8.1	7.7
P60228	Eukaryotic translation initiation factor 3 subunit E	EIF3E	23.2727	23.9991	23.6359	24.1957	24.2449	24.2203	23.699	23.6533	23.6761	-0.58436	-0.54413	-0.04023	0.666945	0.685805	0.9725		18	18	18	43.8	43.8	43.8	52.22	156.8	130700000	146	14	9	13	13	10	10	14	9	13	13	10	10	14	9	13	13	10	10	33.9	22.5	27.2
Q9H3U1	Protein unc-45 homolog A	UNC45A	23.1727	23.3934	23.283	23.6093	23.8053	23.7073	23.7966	24.5216	24.1591	-0.42425	0.451825	-0.876075	0.745226	1.36777	0.544848		34	34	34	44.2	44.2	44.2	103.08	323.31	101120000	241	19	12	19	12	29	26	19	12	19	12	29	26	19	12	19	12	29	26	23.1	14.6	22.2
Q99729	Heterogeneous nuclear ribonucleoprotein A/B	HNRNPAB	22.8221	23.6473	23.2347	24.1929	23.3991	23.796	24.2777	23.9457	24.1117	-0.56129	0.315675	-0.876965	0.677696	1.24459	0.544512		10	10	10	23.8	23.8	23.8	36.224	67.444	85261000	101	4	2	2	4	9	7	4	2	2	4	9	7	4	2	2	4	9	7	10.2	7.5	7.5
Q96AE4	Far upstream element-binding protein 1	FUBP1	23.2438	23.2412	23.2425	23.4711	23.1878	23.3295	24.0257	23.7044	23.8651	-0.08694	0.535605	-0.622545	0.941518	1.44955	0.649524		19	19	18	41	41	39.6	67.56	183.4	69597000	132	7	5	10	7	14	15	7	5	10	7	14	15	7	5	10	7	13	14	13.5	8.7	20
Q7Z6Z7	E3 ubiquitin-protein ligase HUWE1	HUWE1	23.0755	23.1982	23.1368	23.3471	23.2883	23.3177	23.9361	23.7685	23.8523	-0.180825	0.534615	-0.71544	0.882198	1.44856	0.609019		77	77	77	24.3	24.3	24.3	481.89	323.31	85472000	340	22	15	22	26	53	53	22	15	22	26	53	53	22	15	22	26	53	53	6.5	4.4	6.4
Q15075	Early endosome antigen 1	EEA1	23.0915	23.8215	23.4565	23.6123	23.2317	23.422	23.965	24.0558	24.0104	0.03448	0.58836	-0.55388	1.02419	1.50354	0.681186		60	60	60	47.8	47.8	47.8	162.46	323.31	83224000	208	20	22	23	19	41	36	20	22	23	19	41	36	20	22	23	19	41	36	16.1	16.9	19.8
Q00796	Sorbitol dehydrogenase	SORD	22.4266	23.9787	23.2026	22.9172	23.6769	23.2971	24.2427	24.0346	24.1387	-0.09442	0.841615	-0.936035	0.936649	1.79206	0.522667		14	14	14	49.9	49.9	49.9	38.324	95.797	75660000	102	6	5	5	7	10	11	6	5	5	7	10	11	6	5	5	7	10	11	23	18.5	17.1
P67809	Nuclease-sensitive element-binding protein 1	YBX1	23.2693	23.5796	23.4244	24.0316	23.2923	23.662	23.9003	24.7278	24.314	-0.23756	0.65204	-0.8896	0.848179	1.57139	0.539764		13	13	9	50.3	50.3	42.9	35.924	236.19	85017000	144	6	3	9	7	10	8	6	3	9	7	10	8	4	2	6	5	7	6	29.6	13	40.4
P56192	Methionine--tRNA ligase, cytoplasmic	MARS	22.9281	23.4608	23.1944	23.223	23.6672	23.4451	24.2641	23.8149	24.0395	-0.250665	0.59441	-0.845075	0.840509	1.50985	0.556682		32	32	32	43.8	43.8	43.8	101.11	279.4	89010000	182	13	9	11	10	26	19	13	9	11	10	26	19	13	9	11	10	26	19	17.9	12.1	13.8
O75153;Q9Y5I4	Clustered mitochondria protein homolog	CLUH	22.6088	23.1268	22.8678	23.5631	23.1842	23.3737	23.8827	23.9279	23.9053	-0.505885	0.531605	-1.03749	0.704228	1.44554	0.487174		36	36	36	35.5	35.5	35.5	146.67	177.95	75873000	197	15	10	18	14	34	26	15	10	18	14	34	26	15	10	18	14	34	26	12.7	9	15.2
P17812	CTP synthase 1	CTPS1	23.2878	23.8999	23.5939	23.3291	23.5529	23.441	24.0717	24.3486	24.2101	0.152915	0.76917	-0.616255	1.11181	1.70429	0.652362		23	23	21	45.7	45.7	43.3	66.69	188.54	98673000	143	10	10	9	11	14	17	10	10	9	11	14	17	9	10	8	11	13	15	22.2	18.8	19.5
P67775	Serine/threonine-protein phosphatase 2A catalytic subunit alpha isoform	PPP2CA	23.9901	23.5241	23.7571	23.4308	24.5499	23.9904	24.3293	24.7174	24.5234	-0.233305	0.532985	-0.76629	0.850684	1.44692	0.587927		13	13	0	55.3	55.3	0	35.594	323.31	129750000	155	9	8	7	9	11	11	9	8	7	9	11	11	0	0	0	0	0	0	38.8	31.7	29.4
P61163	Alpha-centractin	ACTR1A	23.6597	23.6299	23.6448	22.6584	23.8623	23.2604	24.4583	24.4298	24.444	0.38444	1.18368	-0.799235	1.30535	2.27155	0.574654		10	10	4	34	34	19.4	42.613	152.51	132730000	68	6	6	6	6	5	8	6	6	6	6	5	8	4	3	3	3	3	4	25	22.3	22.1
P52597	Heterogeneous nuclear ribonucleoprotein F;Heterogeneous nuclear ribonucleoprotein F, N-terminally processed	HNRNPF	23.6765	23.6501	23.6633	22.8587	23.9372	23.398	24.0759	24.0688	24.0723	0.26531	0.67437	-0.40906	1.20189	1.5959	0.753114		9	7	7	31.8	25.3	25.3	45.671	313.1	53521000	95	5	3	7	5	6	8	4	3	5	4	4	6	4	3	5	4	4	6	14	7.7	22.2
P55735	Protein SEC13 homolog	SEC13	23.8884	23.5122	23.7003	22.7205	23.7889	23.2547	24.1793	24.2505	24.2149	0.44557	0.96019	-0.51462	1.36185	1.94557	0.699977		9	9	9	47.8	47.8	47.8	35.54	303.27	86403000	88	6	6	6	6	8	9	6	6	6	6	8	9	6	6	6	6	8	9	29.2	29.2	29.2
Q9Y490	Talin-1	TLN1	23.2667	22.9646	23.1157	22.6613	23.1084	22.8849	24.1855	23.7992	23.9923	0.2308	1.10747	-0.87667	1.17349	2.15467	0.544623		71	71	64	44	44	40.4	269.76	323.31	109220000	296	25	11	16	19	56	50	25	11	16	19	56	50	22	10	15	15	50	46	13.6	5.7	7.8
Q99471	Prefoldin subunit 5	PFDN5	23.2995	23.1087	23.2041	22.858	23.1794	23.0187	24.4981	24.1883	24.3432	0.185415	1.32456	-1.13915	1.13714	2.50457	0.454027		9	9	9	66.9	66.9	66.9	17.328	102.12	19557000	54	3	2	2	3	8	4	3	2	2	3	8	4	3	2	2	3	8	4	21.4	14.9	14.9
P53618	Coatomer subunit beta	COPB1	23.4994	23.04	23.2697	23.0848	23.1164	23.1006	24.6607	24.0162	24.3385	0.16906	1.23785	-1.06878	1.12433	2.35846	0.47672		34	34	34	44.2	44.2	44.2	107.14	269.53	122580000	171	21	8	9	11	26	23	21	8	9	11	26	23	21	8	9	11	26	23	25.7	10.9	13.1
O43776	Asparagine--tRNA ligase, cytoplasmic	NARS	24.4212	23.5846	24.0029	22.6718	23.2928	22.9823	23.8504	23.5181	23.6843	1.02062	0.70198	0.318645	2.0288	1.62674	1.24716		22	22	22	42.7	42.7	42.7	62.942	214.84	116770000	145	15	12	9	14	13	9	15	12	9	14	13	9	15	12	9	14	13	9	31.2	25.4	17.3
P50225;P50226	Sulfotransferase 1A1;Sulfotransferase 1A2	SULT1A1;SULT1A2	23.7169	24.1746	23.9458	22.2761	23.2149	22.7455	23.9564	23.3604	23.6584	1.20026	0.91289	0.28737	2.29781	1.88281	1.22041		10	10	5	46.1	46.1	27.5	34.165	58.008	76616000	52	8	3	2	3	10	5	8	3	2	3	10	5	4	0	0	1	5	3	30.2	8.8	5.8
Q9H4A4	Aminopeptidase B	RNPEP	24.964	25.2209	25.0925	23.5483	25.0669	24.3076	24.6082	24.6625	24.6354	0.78486	0.327745	0.457115	1.72293	1.25505	1.37279		33	33	33	57.8	57.8	57.8	72.595	232.38	277180000	216	20	16	14	13	26	24	20	16	14	13	26	24	20	16	14	13	26	24	38	28.8	24.3
P60983	Glia maturation factor beta	GMFB	24.396	25.5396	24.9678	23.0887	25.305	24.1968	24.6071	24.8446	24.7258	0.77098	0.52897	0.24201	1.70643	1.4429	1.18264		10	10	8	66.2	66.2	47.2	16.713	83.983	55361000	55	3	3	2	3	10	4	3	3	2	3	10	4	2	2	1	2	8	4	21.1	21.1	13.4
Q9BRA2	Thioredoxin domain-containing protein 17	TXNDC17	25.348	26.1943	25.7712	23.0532	25.6302	24.3417	24.7841	24.2695	24.5268	1.42949	0.1851	1.24438	2.69351	1.1369	2.36918		4	4	4	38.2	38.2	38.2	13.941	31.065	63007000	61	3	3	2	3	4	3	3	3	2	3	4	3	3	3	2	3	4	3	26.8	26.8	18.7
P68133;P68032;P63267;P62736	Actin, alpha skeletal muscle;Actin, alpha cardiac muscle 1;Actin, gamma-enteric smooth muscle;Actin, aortic smooth muscle	ACTA1;ACTC1;ACTG2;ACTA2	27.7808	24.0393	25.91	25.3506	25.4389	25.3948	23.6396	23.6507	23.6452	0.515285	-1.74956	2.26485	1.42928	0.297391	4.80604		18	3	3	36.1	9.8	9.8	42.051	43.39	1249400000	309	14	13	13	13	13	15	1	1	2	1	2	2	1	1	2	1	2	2	31.3	31.8	32.4
P10412;P16403;P16402;P22492;Q02539	Histone H1.4;Histone H1.2;Histone H1.3	HIST1H1E;HIST1H1C;HIST1H1D	24.7474	24.1412	24.4443	25.3428	25.6062	25.4745	25.8083	21.9017	23.855	-1.03025	-1.61953	0.58928	0.489624	0.32544	1.5045		8	8	8	24.7	24.7	24.7	21.865	27.243	98540000	112	4	2	3	4	8	2	4	2	3	4	8	2	4	2	3	4	8	2	15.1	10.5	14.6
P67936	Tropomyosin alpha-4 chain	TPM4	26.0474	24.5421	25.2948	25.6492	25.2416	25.4454	25.4218	23.4453	24.4336	-0.150675	-1.01188	0.861205	0.900829	0.4959	1.81655		24	24	12	60.5	60.5	38.7	28.521	239.78	301320000	115	18	5	8	9	16	3	18	5	8	9	16	3	11	3	6	6	7	0	56.5	20.2	27
P61026	Ras-related protein Rab-10	RAB10	24.907	25.084	24.9955	25.4889	24.2967	24.8928	25.3811	23.705	24.5431	0.102675	-0.349725	0.4524	1.07376	0.784734	1.36831		13	12	11	48.5	43	39.5	22.541	34.81	102920000	97	9	7	5	6	12	5	8	6	4	5	11	4	7	5	3	4	10	4	44	31	22
Q15008	26S proteasome non-ATPase regulatory subunit 6	PSMD6	24.6534	25.2587	24.9561	23.9193	24.817	24.3682	24.2649	23.9285	24.0967	0.58788	-0.271485	0.859365	1.50304	0.828466	1.81424		33	33	33	73.8	73.8	73.8	45.531	191.73	220910000	197	17	14	11	17	19	18	17	14	11	17	19	18	17	14	11	17	19	18	41.6	34.4	27.2
P14550	Alcohol dehydrogenase [NADP(+)]	AKR1A1	24.7961	25.1034	24.9497	24.336	24.4424	24.3892	23.6717	23.9565	23.8141	0.56054	-0.57507	1.13561	1.47482	0.671254	2.19711		21	21	21	70.2	70.2	70.2	36.573	124.69	134570000	143	9	11	10	11	14	10	9	11	10	11	14	10	9	11	10	11	14	10	32.6	36.3	32.9
P08243	Asparagine synthetase [glutamine-hydrolyzing]	ASNS	25.0043	25.2406	25.1225	23.673	24.3818	24.0274	24.0077	24.0856	24.0467	1.09505	0.01925	1.0758	2.1362	1.01343	2.10789		24	24	24	55.4	55.4	55.4	64.369	136.71	190210000	161	18	13	13	11	17	13	18	13	13	11	17	13	18	13	13	11	17	13	41.4	28.9	25.8
P0DN79;P35520	Cystathionine beta-synthase	CBS	25.1563	25.4813	25.3188	24.4187	24.5278	24.4733	23.6818	23.3292	23.5055	0.845525	-0.967765	1.81329	1.79692	0.511298	3.51443	+	20	20	20	50.5	50.5	50.5	60.586	197.74	209390000	113	13	9	11	12	14	12	13	9	11	12	14	12	13	9	11	12	14	12	33.8	19.2	22
Q9Y230	RuvB-like 2	RUVBL2	25.3607	25.3631	25.3619	25.5081	25.45	25.479	23.0569	24.1567	23.6068	-0.117115	-1.87223	1.75512	0.92203	0.27315	3.37554		21	21	21	47.1	47.1	47.1	51.156	133.4	218810000	237	14	10	13	17	7	16	14	10	13	17	7	16	14	10	13	17	7	16	35	24.2	34.3
Q9HC38	Glyoxalase domain-containing protein 4	GLOD4	24.5533	25.1985	24.8759	24.4441	25.1257	24.7849	23.4773	24.4986	23.9879	0.09105	-0.79694	0.88799	1.06515	0.575569	1.8506		14	14	14	48.6	48.6	48.6	34.793	85.377	185270000	100	10	8	6	7	8	7	10	8	6	7	8	7	10	8	6	7	8	7	39	25.2	22.7
P62879;Q9HAV0	Guanine nucleotide-binding protein G(I)/G(S)/G(T) subunit beta-2	GNB2	24.6755	25.2091	24.9423	24.7846	25.7633	25.274	23.5957	23.796	23.6959	-0.33168	-1.57811	1.24643	0.794611	0.334919	2.37254		11	11	6	44.1	44.1	29.7	37.331	99.339	177490000	98	6	4	5	5	5	4	6	4	5	5	5	4	2	2	2	3	4	2	20.6	15.3	18.2
O15355	Protein phosphatase 1G	PPM1G	25.0759	25.6223	25.3491	24.6742	24.5397	24.607	23.1538	24.685	23.9194	0.742155	-0.687545	1.4297	1.67267	0.62091	2.69391		18	18	18	42.5	42.5	42.5	59.271	186.96	173670000	228	11	8	12	10	10	13	11	8	12	10	10	13	11	8	12	10	10	13	32.2	15.4	27.7
P22102	Trifunctional purine biosynthetic protein adenosine-3;Phosphoribosylamine--glycine ligase;Phosphoribosylformylglycinamidine cyclo-ligase;Phosphoribosylglycinamide formyltransferase	GART	24.6168	24.686	24.6514	24.8118	25.1161	24.964	23.318	24.2884	23.8032	-0.312535	-1.16078	0.84824	0.805226	0.447272	1.8003		36	36	36	47.6	47.6	47.6	107.77	248.07	194240000	247	18	12	15	18	25	21	18	12	15	18	25	21	18	12	15	18	25	21	21	13.5	15
Q9UHD1	Cysteine and histidine-rich domain-containing protein 1	CHORDC1	25.3778	25.1354	25.2566	24.4369	25.4995	24.9682	24.0676	24.2324	24.15	0.288365	-0.81822	1.10658	1.22126	0.567141	2.15335		9	9	9	35.8	35.8	35.8	37.489	93.263	269730000	36	3	3	3	3	5	6	3	3	3	3	5	6	3	3	3	3	5	6	12.3	9.6	14.2
Q9BR76;A9Z1Z3	Coronin-1B	CORO1B	25.202	26.5599	25.8809	24.7762	25.5813	25.1787	23.7589	24.2081	23.9835	0.70221	-1.19524	1.89745	1.627	0.436714	3.72554		16	16	16	39.9	39.9	39.9	54.234	71.806	329910000	166	8	7	9	9	11	8	8	7	9	9	11	8	8	7	9	9	11	8	25.6	13.7	17.4
Q99436	Proteasome subunit beta type-7	PSMB7	25.2599	25.0208	25.1403	23.9869	25.3564	24.6716	24.1989	24.4618	24.3304	0.468685	-0.34128	0.809965	1.38385	0.789341	1.75317		12	12	12	63.9	63.9	63.9	29.965	89.866	133830000	72	5	5	5	5	10	9	5	5	5	5	10	9	5	5	5	5	10	9	13.4	15.9	23.1
P11216	Glycogen phosphorylase, brain form	PYGB	25.3505	25.1457	25.2481	24.482	25.1611	24.8216	24.3828	24.9536	24.6682	0.42657	-0.15336	0.57993	1.34403	0.899154	1.49478		40	40	33	49.8	49.8	42.6	96.695	198.88	348390000	221	26	20	15	12	24	17	26	20	15	12	24	17	20	14	9	7	17	13	35.5	25.4	19.6
Q5JRX3	Presequence protease, mitochondrial	PITRM1	24.9227	25.6424	25.2825	24.9908	25.2998	25.1453	24.0227	23.8427	23.9327	0.13724	-1.2126	1.34984	1.0998	0.43149	2.54884		39	39	39	48.3	48.3	48.3	117.41	323.31	250330000	235	20	15	25	17	26	18	20	15	25	17	26	18	20	15	25	17	26	18	22	17.2	26.9
P62191	26S protease regulatory subunit 4	PSMC1	25.0024	24.8333	24.9178	25.497	25.2101	25.3536	24.8568	24.265	24.5609	-0.43577	-0.79272	0.35695	0.739299	0.577255	1.28072		21	21	21	58.4	58.4	58.4	49.184	294.32	284810000	155	17	9	12	11	11	12	17	9	12	11	11	12	17	9	12	11	11	12	49.3	23.4	32
P43487	Ran-specific GTPase-activating protein	RANBP1	25.0196	24.9998	25.0097	25.3725	25.7395	25.556	24.825	24.415	24.62	-0.546275	-0.935975	0.3897	0.684786	0.522689	1.31012		10	10	10	67.2	67.2	67.2	23.31	86.169	200750000	86	5	3	6	3	8	6	5	3	6	3	8	6	5	3	6	3	8	6	25.4	15.4	42.3
P30084	Enoyl-CoA hydratase, mitochondrial	ECHS1	24.6354	24.6117	24.6236	25.8228	26.0895	25.9561	25.1827	24.9887	25.0857	-1.33256	-0.87042	-0.46214	0.397063	0.546988	0.725909	+	16	16	16	52.8	52.8	52.8	31.387	291.9	237050000	153	7	4	11	10	13	13	7	4	11	10	13	13	7	4	11	10	13	13	27.9	15.9	48.6
P19367;P52790	Hexokinase-1	HK1	24.9646	24.5077	24.7362	26.0042	25.5005	25.7523	23.8996	24.341	24.1203	-1.01615	-1.63203	0.615885	0.494436	0.322634	1.5325		34	34	28	40.7	40.7	35.6	102.48	259.95	316990000	254	20	14	20	21	22	26	20	14	20	21	22	26	16	10	16	16	18	21	23.9	15.6	21.6
P17844	Probable ATP-dependent RNA helicase DDX5	DDX5	24.8663	23.6914	24.2788	26.0567	25.9869	26.0218	25.0058	24.881	24.9434	-1.74298	-1.07838	-0.6646	0.298752	0.47356	0.630864		32	32	24	52.4	52.4	44.8	69.147	164.99	340280000	260	16	9	18	19	24	18	16	9	18	19	24	18	10	6	12	12	19	14	28	16.4	30
P18206	Vinculin	VCL	24.68	24.9136	24.7968	25.9001	25.7654	25.8327	24.839	24.0453	24.4422	-1.03593	-1.39053	0.354595	0.487701	0.381426	1.27863	+	54	54	54	56.3	56.3	56.3	123.8	323.31	319060000	373	28	26	35	35	38	19	28	26	35	35	38	19	28	26	35	35	38	19	30	24.6	35.3
Q13347	Eukaryotic translation initiation factor 3 subunit I	EIF3I	25.7228	25.6905	25.7066	24.7952	25.3088	25.052	24.569	24.3593	24.4641	0.654615	-0.58789	1.2425	1.5742	0.665315	2.36609		18	18	18	74.2	74.2	74.2	36.501	97.408	242620000	151	9	8	9	10	13	11	9	8	9	10	13	11	9	8	9	10	13	11	30.2	25.5	30.8
P62195	26S protease regulatory subunit 8	PSMC5	25.775	25.372	25.5735	25.3511	25.3974	25.3743	24.6105	23.701	24.1558	0.19922	-1.21848	1.4177	1.14808	0.429735	2.67159		23	23	22	65	65	62.1	45.626	209.94	349650000	209	16	8	9	10	13	14	16	8	9	10	13	14	15	7	8	9	12	13	51.5	21.9	25.9
P31150	Rab GDP dissociation inhibitor alpha	GDI1	26.2521	25.7928	26.0224	25.796	25.5164	25.6562	24.4923	24.3017	24.397	0.366225	-1.25918	1.6254	1.28898	0.417783	3.08528		31	21	21	71.6	54.4	54.4	50.582	323.31	414010000	244	27	18	20	19	19	19	17	11	12	11	9	9	17	11	12	11	9	9	67.3	48.1	46.5
P13798	Acylamino-acid-releasing enzyme	APEH	25.6728	25.0952	25.384	25.0081	24.6986	24.8534	25.0943	24.2397	24.667	0.530615	-0.18641	0.717025	1.44454	0.87879	1.64379		20	20	20	40.6	40.6	40.6	81.224	218.61	276090000	232	16	13	14	12	11	16	16	13	14	12	11	16	16	13	14	12	11	16	28.3	22.5	23.5
P15311	Ezrin	EZR	25.8286	24.9365	25.3826	25.4479	24.8402	25.1441	24.9264	24.4541	24.6902	0.23851	-0.453845	0.692355	1.17977	0.730094	1.61592		32	22	22	54.4	40.4	40.4	69.412	178.24	338280000	177	21	15	17	11	23	22	12	9	10	7	15	14	12	9	10	7	15	14	34.3	23.7	26.6
Q99798	Aconitate hydratase, mitochondrial	ACO2	25.1359	24.7909	24.9634	25.4858	25.3517	25.4188	23.4992	23.0838	23.2915	-0.455335	-2.12722	1.67188	0.729341	0.228899	3.1863		30	30	30	48.5	48.5	48.5	85.424	323.31	291370000	199	17	13	16	19	13	16	17	13	16	19	13	16	17	13	16	19	13	16	26	20.8	24.9
P62993	Growth factor receptor-bound protein 2	GRB2	25.4647	24.895	25.1799	25.0629	24.8436	24.9532	24.452	23.9093	24.1807	0.226675	-0.77253	0.999205	1.17014	0.58539	1.9989		15	15	15	65	65	65	25.206	71.019	106660000	106	7	4	7	7	12	12	7	4	7	7	12	12	7	4	7	7	12	12	32.7	19.8	29.5
P54727	UV excision repair protein RAD23 homolog B	RAD23B	25.6235	24.4378	25.0306	25.5694	24.1287	24.8491	24.3397	23.8343	24.087	0.181555	-0.76204	0.943595	1.13411	0.589662	1.92331		16	16	14	53.1	53.1	51.1	43.171	128.04	278920000	138	10	6	10	9	12	8	10	6	10	9	12	8	9	5	8	8	11	8	29.1	18.8	24.4
P50502;Q8NFI4;Q8IZP2	Hsc70-interacting protein;Putative protein FAM10A5;Putative protein FAM10A4	ST13;ST13P5;ST13P4	25.1335	24.4955	24.8145	25.5414	25.0943	25.3179	24.2629	23.7465	24.0047	-0.503325	-1.31314	0.809815	0.705479	0.402444	1.75299		8	8	8	25.5	25.5	25.5	41.331	151.79	240280000	117	6	5	4	7	4	5	6	5	4	7	4	5	6	5	4	7	4	5	18.4	16.5	12.5
P30040	Endoplasmic reticulum resident protein 29	ERP29	25.0898	24.4485	24.7691	24.9459	24.8561	24.901	23.7589	24.2244	23.9916	-0.131885	-0.90938	0.777495	0.912638	0.532414	1.71415		13	13	13	59.8	59.8	59.8	28.993	127.08	173470000	149	7	8	8	9	8	6	7	8	8	9	8	6	7	8	8	9	8	6	32.6	33.3	32.6
P14314	Glucosidase 2 subunit beta	PRKCSH	25.7494	25.0381	25.3937	25.2463	25.3411	25.2937	23.5496	22.9142	23.2319	0.10004	-2.0618	2.16184	1.0718	0.239518	4.47484		16	16	16	34.1	34.1	34.1	59.425	162.05	332150000	249	10	12	12	12	8	7	10	12	12	12	8	7	10	12	12	12	8	7	23.9	27.3	24.1
P15924	Desmoplakin	DSP	24.9619	25.1623	25.0621	25.911	24.9992	25.4551	23.7566	24.2876	24.0221	-0.39302	-1.43299	1.03997	0.761534	0.370364	2.05618		82	82	82	32	32	32	331.77	323.31	216980000	560	34	31	37	25	50	33	34	31	37	25	50	33	34	31	37	25	50	33	13	10.1	11.7
P62750	60S ribosomal protein L23a	RPL23A	25.4439	23.7137	24.5788	24.1693	25.1555	24.6624	25.6186	25.1569	25.3878	-0.083615	0.725355	-0.80897	0.94369	1.65331	0.570789		12	12	12	44.2	44.2	44.2	17.695	70.658	74923000	110	5	2	4	3	12	9	5	2	4	3	12	9	5	2	4	3	12	9	27.6	13.5	26.9
P09651	Heterogeneous nuclear ribonucleoprotein A1;Heterogeneous nuclear ribonucleoprotein A1, N-terminally processed	HNRNPA1	25.8645	23.5894	24.727	23.6211	24.7564	24.1888	26.2019	25.1394	25.6707	0.538185	1.4819	-0.943715	1.45214	2.79316	0.519892		20	20	8	46.8	46.8	22.3	38.746	201.22	104160000	140	9	3	5	4	17	13	9	3	5	4	17	13	3	1	1	2	6	6	23.4	7.8	16.4
P15531	Nucleoside diphosphate kinase A	NME1	26.3246	24.4884	25.4065	23.817	24.5771	24.1971	25.1077	24.1577	24.6327	1.20937	0.43561	0.77376	2.31237	1.35248	1.70972		13	7	7	70.4	39.5	39.5	17.149	40.568	140990000	98	10	8	6	8	12	9	4	2	2	2	7	4	4	2	2	2	7	4	51.3	46.7	46.1
Q15185	Prostaglandin E synthase 3	PTGES3	25.2436	25.0563	25.15	24.0147	25.9679	24.9913	26.1019	24.8437	25.4728	0.15866	0.481525	-0.322865	1.11625	1.39622	0.799481		9	9	9	44.4	44.4	44.4	18.697	90.818	110350000	90	5	4	2	5	8	7	5	4	2	5	8	7	5	4	2	5	8	7	24.4	23.1	13.8
Q02543	60S ribosomal protein L18a	RPL18A	25.0161	24.7225	24.8693	23.8818	24.8944	24.3881	26.0116	25.5178	25.7647	0.48122	1.37666	-0.89544	1.39592	2.59667	0.537583		14	14	14	48.9	48.9	48.9	20.762	94.814	102350000	150	8	2	3	6	11	8	8	2	3	6	11	8	8	2	3	6	11	8	35.8	15.3	21
P83731	60S ribosomal protein L24	RPL24	24.8362	24.2993	24.5677	24.1313	25.0302	24.5808	25.4322	25.65	25.5411	-0.01303	0.960295	-0.973325	0.991009	1.94571	0.509331		7	7	7	34.4	34.4	34.4	17.779	39.308	70916000	153	4	4	3	5	7	6	4	4	3	5	7	6	4	4	3	5	7	6	24.2	24.2	18.5
P62913	60S ribosomal protein L11	RPL11	25.1312	24.1671	24.6491	24.3211	25.3616	24.8413	26.3566	26.2508	26.3037	-0.19219	1.46236	-1.65455	0.875276	2.75559	0.317637		7	7	7	30.9	30.9	30.9	20.252	137.95	118610000	148	3	3	4	3	5	4	3	3	4	3	5	4	3	3	4	3	5	4	16.9	16.9	21.3
P12956	X-ray repair cross-complementing protein 6	XRCC6	25.3757	24.8037	25.0897	24.3063	25.2323	24.7693	25.5267	25.4844	25.5055	0.320455	0.736275	-0.41582	1.24872	1.66587	0.749593		37	37	37	63.5	63.5	63.5	69.842	323.31	361420000	283	17	13	15	12	24	27	17	13	15	12	24	27	17	13	15	12	24	27	33	25.6	25.6
P59998;A0A0A6YYG9	Actin-related protein 2/3 complex subunit 4	ARPC4;ARPC4-TTLL3	26.0082	24.6582	25.3332	22.6974	25.8499	24.2736	25.9082	25.8529	25.8805	1.05954	1.60693	-0.54738	2.08427	3.04602	0.684262		7	7	7	47.6	47.6	47.6	19.667	86.45	124160000	108	4	3	3	4	6	6	4	3	3	4	6	6	4	3	3	4	6	6	22.6	16.1	17.9
Q9BV57	1,2-dihydroxy-3-keto-5-methylthiopentene dioxygenase	ADI1	25.2236	24.4214	24.8225	22.4727	23.9078	23.1902	25.1756	24.5467	24.8612	1.63226	1.67092	-0.038655	3.09998	3.18416	0.973562		12	12	12	60.9	60.9	60.9	21.498	60.157	70933000	93	6	4	2	4	11	7	6	4	2	4	11	7	6	4	2	4	11	7	36.3	20.7	15.6
P62136	Serine/threonine-protein phosphatase PP1-alpha catalytic subunit	PPP1CA	24.3416	24.2028	24.2722	23.48	24.6772	24.0786	25.5275	25.1644	25.3459	0.193545	1.26729	-1.07375	1.14357	2.4071	0.475083		23	23	6	68.2	68.2	24.5	37.512	180.67	166960000	120	12	5	9	11	19	15	12	5	9	11	19	15	5	3	4	4	4	4	31.8	16.4	30.9
Q7Z406;P12883;Q9UKX3;P13533;P12882;A7E2Y1	Myosin-14	MYH14	24.3698	24.4389	24.4044	23.0071	24.2597	23.6334	24.9333	25.1793	25.0563	0.77097	1.42294	-0.651965	1.70642	2.6813	0.636413		97	88	85	49.8	46.8	45.1	227.87	323.31	214740000	410	43	41	18	34	70	70	36	34	14	26	65	64	34	33	13	25	63	61	25.2	22.8	11
Q92688	Acidic leucine-rich nuclear phosphoprotein 32 family member B	ANP32B	25.765	23.8078	24.7864	25.7446	24.9185	25.3315	26.2615	26.4919	26.3767	-0.5451	1.0452	-1.5903	0.685344	2.06365	0.332102		11	9	9	34.3	29.1	29.1	28.787	41.794	383600000	126	8	7	9	7	8	9	6	6	7	5	6	7	6	6	7	5	6	7	31.9	25.5	32.3
Q06323	Proteasome activator complex subunit 1	PSME1	25.0415	24.7534	24.8974	25.5446	24.8467	25.1956	26.1035	26.2	26.1517	-0.298205	0.956095	-1.2543	0.813264	1.94005	0.419197		20	20	20	68.7	68.7	68.7	28.723	192.43	217890000	205	12	7	14	11	15	14	12	7	14	11	15	14	12	7	14	11	15	14	46.2	28.5	51
Q01105;P0DME0	Protein SET;Protein SETSIP	SET;SETSIP	26.1515	23.9183	25.0349	26.0779	24.8628	25.4703	26.0381	25.8325	25.9353	-0.435415	0.46496	-0.900375	0.739481	1.38028	0.535747		11	11	11	34.5	34.5	34.5	33.488	145.12	197680000	156	5	3	6	4	11	9	5	3	6	4	11	9	5	3	6	4	11	9	19.3	11.7	24.1
Q00839	Heterogeneous nuclear ribonucleoprotein U	HNRNPU	25.0012	24.4084	24.7048	25.4733	25.2818	25.3776	25.9444	26.0024	25.9734	-0.672745	0.595825	-1.26857	0.627312	1.51134	0.415071		32	32	32	40.2	40.2	40.2	90.583	323.31	328500000	359	13	5	11	10	31	22	13	5	11	10	31	22	13	5	11	10	31	22	17.1	6.4	14.3
P62829	60S ribosomal protein L23	RPL23	24.7974	24.6703	24.7339	25.9516	25.4165	25.684	24.949	26.072	25.5105	-0.95016	-0.17356	-0.7766	0.517575	0.886652	0.583741		12	12	12	70	70	70	14.865	50.063	62552000	92	4	4	3	6	9	8	4	4	3	6	9	8	4	4	3	6	9	8	37.9	30	18.6
P14324	Farnesyl pyrophosphate synthase	FDPS	25.3769	24.5239	24.9504	25.0889	25.1824	25.1357	25.486	26.2745	25.8802	-0.18526	0.744545	-0.929805	0.879491	1.67545	0.524929		11	11	11	35.6	35.6	35.6	48.275	54.11	260730000	108	6	7	6	8	9	6	6	7	6	8	9	6	6	7	6	8	9	6	17.4	17.4	14.6
P40227;Q92526	T-complex protein 1 subunit zeta	CCT6A	24.857	23.7929	24.3249	25.652	25.2124	25.4322	26.0289	26.0895	26.0592	-1.10727	0.626985	-1.73426	0.464172	1.54433	0.300564		29	29	29	60.6	60.6	60.6	58.024	323.31	346300000	220	16	7	12	12	18	23	16	7	12	12	18	23	16	7	12	12	18	23	38.2	13.7	24.9
P36578	60S ribosomal protein L4	RPL4	24.6245	24.3727	24.4986	24.9384	24.9636	24.951	25.5516	25.9016	25.7266	-0.452355	0.77561	-1.22796	0.730849	1.71191	0.426919		23	23	23	47.3	47.3	47.3	47.697	96.674	245280000	270	13	5	15	12	13	19	13	5	15	12	13	19	13	5	15	12	13	19	28.8	13.8	36.3
P05141;Q9H0C2	ADP/ATP translocase 2;ADP/ATP translocase 2, N-terminally processed	SLC25A5	24.2468	24.4495	24.3481	25.4355	24.8144	25.125	25.4814	25.9304	25.7059	-0.77686	0.5809	-1.35776	0.583636	1.49578	0.390188		11	11	5	34.9	34.9	16.4	32.852	52.668	191570000	139	10	7	9	8	9	9	10	7	9	8	9	9	4	2	4	2	4	4	34.6	23.2	30.5
P29692	Elongation factor 1-delta	EEF1D	25.165	22.9786	24.0718	24.663	24.272	24.4675	25.8312	26.7388	26.285	-0.395735	1.81748	-2.21321	0.760102	3.52465	0.215653		11	11	10	52	52	48	31.121	229.95	251580000	155	7	4	8	5	9	4	7	4	8	5	9	4	7	4	7	4	9	4	34.9	21.7	38.8
Q9H993	Protein-glutamate O-methyltransferase	ARMT1	24.9872	24.3462	24.6667	24.8238	24.6009	24.7123	24.824	24.8907	24.8574	-0.045655	0.145005	-0.19066	0.96885	1.10573	0.876205		18	18	18	43.8	43.8	43.8	51.172	157.24	259100000	209	10	6	9	10	15	13	10	6	9	10	15	13	10	6	9	10	15	13	24	12.2	19
Q15366	Poly(rC)-binding protein 2	PCBP2	24.6573	24.1562	24.4068	25.2182	24.5612	24.8897	25.2744	24.9269	25.1006	-0.482915	0.210955	-0.69387	0.71553	1.15745	0.618193		13	9	8	56.7	43.8	40	38.58	124.43	153470000	159	7	9	7	8	11	10	5	5	4	5	9	7	4	4	3	4	8	6	27.1	31.5	26.3
P78417	Glutathione S-transferase omega-1	GSTO1	25.2878	24.5101	24.899	25.1	24.2147	24.6573	24.7253	25.0092	24.8673	0.24164	0.20991	0.03173	1.18234	1.15662	1.02224		15	15	15	49.4	49.4	49.4	27.566	44.526	165440000	95	8	6	5	7	8	7	8	6	5	7	8	7	8	6	5	7	8	7	31.5	23.2	20.3
P06493;Q96Q40;O94921;Q07002;Q9NYV4;Q14004	Cyclin-dependent kinase 1	CDK1	24.5886	24.6205	24.6046	25.3244	25.0357	25.18	25.0732	24.862	24.9676	-0.57549	-0.21248	-0.36301	0.671058	0.863052	0.777541		15	15	13	61.6	61.6	55.2	34.095	89.315	175470000	121	7	5	8	7	13	5	7	5	8	7	13	5	5	3	6	5	11	3	29.3	18.5	33.7
P41252	Isoleucine--tRNA ligase, cytoplasmic	IARS	24.3746	24.1978	24.2862	25.453	25.1765	25.3148	25.6538	24.7877	25.2207	-1.02856	-0.09404	-0.93452	0.490199	0.936895	0.523217	+	51	51	51	48.9	48.9	48.9	144.5	323.31	267580000	365	25	17	31	23	42	28	25	17	31	23	42	28	25	17	31	23	42	28	22.9	15	25.5
Q9UL46	Proteasome activator complex subunit 2	PSME2	24.4224	24.8701	24.6462	24.5577	24.4402	24.499	25.209	25.2693	25.2392	0.14729	0.74022	-0.59293	1.10749	1.67043	0.662995		12	12	12	58.2	58.2	58.2	27.401	208.28	136990000	127	7	5	5	6	10	10	7	5	5	6	10	10	7	5	5	6	10	10	24.3	18.4	18.4
Q99873;Q9NR22	Protein arginine N-methyltransferase 1	PRMT1	24.0479	24.3513	24.1996	24.0933	24.6575	24.3754	25.3696	25.7136	25.5416	-0.17583	1.16618	-1.34201	0.885258	2.24417	0.394469		21	21	21	57.1	57.1	57.1	41.515	305.25	191020000	195	14	12	11	14	15	17	14	12	11	14	15	17	14	12	11	14	15	17	39.3	34.9	31
Q99460	26S proteasome non-ATPase regulatory subunit 1	PSMD1	25.0208	24.9667	24.9938	24.5378	24.6622	24.6	25.1185	25.2795	25.199	0.39377	0.598985	-0.205215	1.31382	1.51465	0.867409	+	42	42	42	58.3	58.3	58.3	105.84	323.31	281730000	376	24	20	21	18	36	31	24	20	21	18	36	31	24	20	21	18	36	31	34.6	26.2	29.5
Q13907;Q9BXS1	Isopentenyl-diphosphate Delta-isomerase 1	IDI1	24.8036	24.6764	24.74	24.412	24.1091	24.2605	25.5273	25.2435	25.3854	0.47947	1.12486	-0.645395	1.39423	2.18081	0.639318		14	14	14	67.8	67.8	67.8	26.319	152.79	138510000	112	7	4	9	5	11	11	7	4	9	5	11	11	7	4	9	5	11	11	24.7	14.1	33.5
P53621	Coatomer subunit alpha;Xenin;Proxenin	COPA	23.9289	24.471	24.1999	23.9169	23.8321	23.8745	25.8032	25.452	25.6276	0.325425	1.75309	-1.42766	1.25303	3.37079	0.371733		64	64	64	59	59	59	138.34	323.31	154620000	269	20	20	15	21	52	40	20	20	15	21	52	40	20	20	15	21	52	40	19.7	17.3	13.2
P46776	60S ribosomal protein L27a	RPL27A	24.9918	24.2444	24.6181	24.0632	24.7136	24.3884	25.6944	25.3625	25.5285	0.2297	1.14008	-0.910385	1.17259	2.20394	0.532043		7	7	7	38.5	38.5	38.5	16.561	55.906	73119000	85	4	4	4	3	6	7	4	4	4	3	6	7	4	4	4	3	6	7	29.1	29.1	29.1
O75131;Q96FN4;Q8IYJ1;Q96A23;Q86YQ8;Q9HCH3;Q9UBL6	Copine-3	CPNE3	24.4195	25.0017	24.7106	24.5496	24.9933	24.7714	25.9402	25.2234	25.5818	-0.060835	0.81038	-0.871215	0.958709	1.75367	0.546686		25	25	24	52.3	52.3	52.3	60.13	305.18	229250000	158	14	8	10	12	19	21	14	8	10	12	19	21	13	7	9	11	18	20	31.3	16.4	21.6
P30048	Thioredoxin-dependent peroxide reductase, mitochondrial	PRDX3	23.6921	25.0331	24.3626	25.0755	24.2693	24.6724	26.2501	24.7723	25.5112	-0.309765	0.8388	-1.14856	0.806773	1.78856	0.451074		11	11	11	43.8	43.8	43.8	27.692	91.091	84352000	82	6	5	6	6	8	8	6	5	6	6	8	8	6	5	6	6	8	8	24.2	18.8	25
Q9UNM6	26S proteasome non-ATPase regulatory subunit 13	PSMD13	24.5088	25.8752	25.192	24.9892	25.4231	25.2062	25.6187	25.3285	25.4736	-0.01414	0.267415	-0.281555	0.990247	1.20365	0.822704		27	27	27	71	71	71	42.945	323.31	309070000	177	15	16	12	12	20	22	15	16	12	12	20	22	15	16	12	12	20	22	47.1	41.5	38
Q9HB71	Calcyclin-binding protein	CACYBP	24.531	25.0086	24.7698	24.6542	25.4233	25.0387	25.2293	25.3854	25.3073	-0.26892	0.26858	-0.5375	0.829941	1.20462	0.688964		15	15	15	68.9	68.9	68.9	26.21	51.963	160540000	147	9	5	10	8	10	11	9	5	10	8	10	11	9	5	10	8	10	11	41.2	20.6	36.4
Q96CN7	Isochorismatase domain-containing protein 1	ISOC1	24.4753	25.2405	24.8579	24.619	25.1861	24.9025	24.9724	24.8593	24.9158	-0.044645	0.01328	-0.057925	0.969528	1.00925	0.960645		13	13	13	49.3	49.3	49.3	32.236	78.333	175880000	144	7	7	6	7	11	7	7	7	6	7	11	7	7	7	6	7	11	7	22.1	25.2	22.8
Q15046	Lysine--tRNA ligase	KARS	25.2053	25.2327	25.219	24.9065	25.6222	25.2643	24.7625	25.1285	24.9455	-0.045355	-0.318845	0.27349	0.969051	0.801711	1.20873		31	31	31	50.6	50.6	50.6	68.047	252.18	401070000	227	18	18	18	18	16	16	18	18	18	18	16	16	18	18	18	18	16	16	36.7	28.5	31
P53004	Biliverdin reductase A	BLVRA	24.3915	25.4209	24.9062	24.3885	25.3689	24.8787	24.5419	25.5783	25.0601	0.02745	0.18139	-0.15394	1.01921	1.13398	0.898793		18	18	18	52.7	52.7	52.7	33.428	146.16	187670000	156	7	10	6	10	14	12	7	10	6	10	14	12	7	10	6	10	14	12	26	28.4	22.6
P47897	Glutamine--tRNA ligase	QARS	24.4511	25.0795	24.7653	24.4886	25.0115	24.7501	24.8266	24.6309	24.7288	0.01522	-0.02131	0.03653	1.01061	0.985338	1.02564		35	34	34	52.3	52.3	52.3	87.798	253.3	229520000	229	22	17	19	15	21	25	21	16	18	14	21	25	21	16	18	14	21	25	33.9	22.5	27
P39023;Q92901	60S ribosomal protein L3	RPL3	24.6822	25.2136	24.9479	25.6648	24.9108	25.2878	25.0953	25.1889	25.1421	-0.33994	-0.14569	-0.19425	0.790074	0.903947	0.874027		13	13	13	34	34	34	46.108	69.421	167590000	148	5	3	6	6	11	10	5	3	6	6	11	10	5	3	6	6	11	10	12.9	7.9	14.9
P22234	Multifunctional protein ADE2;Phosphoribosylaminoimidazole-succinocarboxamide synthase;Phosphoribosylaminoimidazole carboxylase	PAICS	24.8916	25.724	25.3078	24.94	25.9662	25.4531	25.6987	25.0901	25.3944	-0.14529	-0.0587	-0.08659	0.904198	0.960129	0.941746		21	21	21	61.6	61.6	61.6	47.079	323.31	460420000	222	14	12	13	11	11	11	14	12	13	11	11	11	14	12	13	11	11	11	37.2	34.1	33.6
P17858	ATP-dependent 6-phosphofructokinase, liver type	PFKL	24.52	24.8051	24.6625	25.2249	25.1056	25.1652	24.6976	25.3122	25.0049	-0.5027	-0.16035	-0.34235	0.705785	0.894808	0.788755		34	30	29	54.4	48.6	47.4	85.018	211.79	236270000	270	17	13	17	19	21	23	14	9	14	15	18	21	13	9	13	14	18	20	23.5	18.5	20.1
P07384	Calpain-1 catalytic subunit	CAPN1	24.8223	25.4148	25.1185	25.0648	24.9534	25.0091	25.5749	25.8807	25.7278	0.10944	0.71868	-0.60924	1.07881	1.64568	0.655542		42	42	42	55.2	55.2	55.2	81.889	323.31	377160000	331	25	18	17	20	29	30	25	18	17	20	29	30	25	18	17	20	29	30	34.9	23.4	25.4
O95433	Activator of 90 kDa heat shock protein ATPase homolog 1	AHSA1	24.5888	25.7024	25.1456	24.7283	24.7705	24.7494	25.995	25.5408	25.7679	0.396165	1.01854	-0.622375	1.31601	2.02587	0.649601		24	24	24	78.1	78.1	78.1	38.274	147.02	170110000	186	9	9	11	11	17	18	9	9	11	11	17	18	9	9	11	11	17	18	27.2	25.4	29
O75347	Tubulin-specific chaperone A	TBCA	24.1249	25.0781	24.6015	25.3012	25.4617	25.3815	26.4284	24.5874	25.5079	-0.77995	0.126475	-0.906425	0.582387	1.09162	0.533505		13	13	13	71.3	71.3	71.3	12.855	55.599	75235000	86	7	7	4	7	9	8	7	7	4	7	9	8	7	7	4	7	9	8	54.6	52.8	32.4
E9PAV3;Q9BZK3	Nascent polypeptide-associated complex subunit alpha, muscle-specific form	NACA	24.7073	24.7858	24.7466	25.0829	25.3175	25.2002	24.9888	25.4375	25.2131	-0.453615	0.01294	-0.466555	0.730211	1.00901	0.723691		7	7	7	4.5	4.5	4.5	205.42	218.66	201940000	182	4	4	3	4	6	6	4	4	3	4	6	6	4	4	3	4	6	6	2.6	2.7	2
O43242	26S proteasome non-ATPase regulatory subunit 3	PSMD3	25.0387	25.8654	25.4521	25.0013	25.3877	25.1945	25.211	25.2569	25.234	0.25756	0.0395	0.21806	1.19546	1.02776	1.16317		32	32	32	61.8	61.8	61.8	60.977	191.87	283270000	254	19	14	16	15	25	18	19	14	16	15	25	18	19	14	16	15	25	18	39.3	27.5	30.1
P46777	60S ribosomal protein L5	RPL5	25.107	24.0033	24.5551	25.4962	23.7647	24.6304	24.895	25.1866	25.0408	-0.07531	0.410325	-0.485635	0.949138	1.32899	0.714183		14	14	14	44.8	44.8	44.8	34.362	120.41	177210000	152	12	9	9	12	11	8	12	9	9	12	11	8	12	9	9	12	11	8	36.4	31	27.6
P62316	Small nuclear ribonucleoprotein Sm D2	SNRPD2	25.6955	22.2776	23.9866	26.0536	24.1578	25.1057	25.4843	25.5195	25.5019	-1.11914	0.39618	-1.51533	0.460367	1.31602	0.349818		11	11	11	59.3	59.3	59.3	13.527	103.13	63336000	120	5	2	4	5	9	7	5	2	4	5	9	7	5	2	4	5	9	7	33.9	16.9	25.4
Q13263	Transcription intermediary factor 1-beta	TRIM28	24.7807	23.2135	23.9971	25.4096	24.4139	24.9118	24.8942	24.9485	24.9213	-0.914705	0.009575	-0.92428	0.530452	1.00666	0.526943		30	30	30	58.2	58.2	58.2	88.549	323.31	240200000	368	19	7	12	11	25	25	19	7	12	11	25	25	19	7	12	11	25	25	37.8	9.3	22.6
Q86YZ3	Hornerin	HRNR	25.0362	23.0994	24.0678	25.5093	22.7197	24.1145	23.7303	24.8377	24.284	-0.046675	0.16955	-0.216225	0.968165	1.12471	0.860815		30	30	30	30.9	30.9	30.9	282.39	163.09	173240000	642	22	6	19	3	12	8	22	6	19	3	12	8	22	6	19	3	12	8	26.5	8	21.2
Q5D862	Filaggrin-2	FLG2	25.2702	23.4689	24.3695	25.1884	22.9349	24.0616	23.5886	23.8998	23.7442	0.307895	-0.3174	0.625295	1.2379	0.802515	1.54253		13	13	13	9.5	9.5	9.5	248.07	159.51	102820000	211	8	2	10	3	5	4	8	2	10	3	5	4	8	2	10	3	5	4	7.2	1	7.7
O95336	6-phosphogluconolactonase	PGLS	24.5414	22.7204	23.6309	25.1357	23.9496	24.5426	24.3329	24.2668	24.2998	-0.911755	-0.242805	-0.66895	0.531538	0.845101	0.628964		12	12	12	62.4	62.4	62.4	27.547	122.9	111390000	104	8	6	7	7	10	11	8	6	7	7	10	11	8	6	7	7	10	11	39.9	26	41.1
P31943	Heterogeneous nuclear ribonucleoprotein H;Heterogeneous nuclear ribonucleoprotein H, N-terminally processed	HNRNPH1	24.9789	23.1602	24.0696	24.6545	23.5902	24.1224	24.0298	24.949	24.4894	-0.052825	0.367	-0.419825	0.964047	1.28967	0.747515		11	11	6	36.5	36.5	20.3	49.229	292.32	94549000	162	5	3	7	6	7	10	5	3	7	6	7	10	2	2	3	3	3	5	14.9	8.7	20.7
P61254;J3QQQ9	60S ribosomal protein L26	RPL26	24.1458	23.2887	23.7173	25.0914	24.5117	24.8016	25.2264	25.4218	25.3241	-1.08428	0.522555	-1.60683	0.471628	1.4365	0.328318		11	11	2	42.8	42.8	7.6	17.258	23.971	96298000	96	6	5	5	8	6	6	6	5	5	8	6	6	1	0	1	2	1	1	30.3	22.8	25.5
P49720	Proteasome subunit beta type-3	PSMB3	24.0141	23.9221	23.9681	25.0401	23.9516	24.4959	25.3986	25.1255	25.2621	-0.527775	0.766235	-1.29401	0.693624	1.70083	0.407816		12	12	12	42.4	42.4	42.4	22.949	56.279	76527000	96	6	4	4	4	8	8	6	4	4	4	8	8	6	4	4	4	8	8	25.9	22.9	22.9
P49591	Serine--tRNA ligase, cytoplasmic	SARS	24.7145	23.6548	24.1847	24.7586	24.3975	24.5781	25.1231	24.9081	25.0156	-0.393435	0.437515	-0.83095	0.761315	1.35427	0.562159		21	21	21	50	50	50	58.777	199.2	202710000	168	14	7	8	10	18	16	14	7	8	10	18	16	14	7	8	10	18	16	38.5	15.2	18.7
P42677	40S ribosomal protein S27	RPS27	24.0382	23.4897	23.7639	24.5732	23.5596	24.0664	26.0052	24.5284	25.2668	-0.302495	1.20037	-1.50286	0.810849	2.29799	0.352852		5	5	3	40.5	40.5	15.5	9.461	13.505	80775000	67	3	3	3	3	4	5	3	3	3	3	4	5	1	1	1	1	2	3	38.1	38.1	38.1
P21291	Cysteine and glycine-rich protein 1	CSRP1	24.0728	23.0047	23.5388	23.7461	24.5696	24.1578	24.6329	25.427	25.03	-0.619095	0.872105	-1.4912	0.651079	1.83033	0.355717		12	12	12	64.8	64.8	64.8	20.567	134.49	60429000	146	8	5	5	6	10	7	8	5	5	6	10	7	8	5	5	6	10	7	55.4	33.2	34.2
P40429;Q6NVV1	60S ribosomal protein L13a;Putative 60S ribosomal protein L13a protein RPL13AP3	RPL13A;RPL13AP3	24.0914	23.6967	23.894	24.2867	24.4313	24.359	25.765	25.4952	25.6301	-0.46502	1.27107	-1.73609	0.724461	2.41341	0.300181		7	7	7	30	30	30	23.577	61.708	102380000	106	6	6	4	5	7	5	6	6	4	5	7	5	6	6	4	5	7	5	25.1	25.1	20.7
P11766	Alcohol dehydrogenase class-3	ADH5	24.2391	24.5695	24.4043	24.2257	23.7652	23.9954	24.1064	25.1104	24.6084	0.40888	0.61298	-0.2041	1.32765	1.52942	0.86808		19	19	19	62	62	62	39.724	153.29	124610000	168	13	13	8	10	13	8	13	13	8	10	13	8	13	13	8	10	13	8	38	35.6	24.3
Q9Y3F4	Serine-threonine kinase receptor-associated protein	STRAP	23.5178	24.8564	24.1871	24.2233	24.1924	24.2078	24.5171	24.2613	24.3892	-0.020695	0.18137	-0.202065	0.985758	1.13396	0.869305		17	17	17	62	62	62	38.438	280.64	123990000	136	10	11	10	12	11	10	10	11	10	12	11	10	10	11	10	12	11	10	39.7	42	37.1
Q9Y262	Eukaryotic translation initiation factor 3 subunit L	EIF3L	23.7965	24.5034	24.1499	24.4969	24.323	24.4099	24.2053	24.0824	24.1438	-0.25999	-0.266085	0.006095	0.835094	0.831573	1.00423		26	26	26	49.8	49.8	49.8	66.726	323.31	108280000	181	15	13	13	13	16	18	15	13	13	13	16	18	15	13	13	13	16	18	29.3	24.3	25.2
Q14566	DNA replication licensing factor MCM6	MCM6	23.0889	23.992	23.5404	24.9391	24.4333	24.6862	24.5412	24.1488	24.345	-1.14576	-0.34117	-0.80459	0.451952	0.789401	0.572525		35	35	35	51	51	51	92.888	323.31	157490000	217	17	9	20	14	24	23	17	9	20	14	24	23	17	9	20	14	24	23	23.5	11.3	24.8
Q13630	GDP-L-fucose synthase	TSTA3	23.8211	24.8326	24.3269	24.7417	24.5142	24.628	24.5145	24.5392	24.5269	-0.30111	-0.101125	-0.199985	0.811628	0.932306	0.87056		10	10	10	38.3	38.3	38.3	35.892	160.32	164670000	104	6	9	7	7	7	6	6	9	7	7	7	6	6	9	7	7	7	6	24.3	32.7	28.3
Q12905	Interleukin enhancer-binding factor 2	ILF2	23.9996	24.4214	24.2105	24.3883	24.9136	24.6509	24.8106	24.2576	24.5341	-0.4404	-0.116815	-0.323585	0.73693	0.922221	0.799082		16	16	16	58.5	58.5	58.5	43.062	174.48	212040000	167	7	6	7	8	13	14	7	6	7	8	13	14	7	6	7	8	13	14	23.8	19.7	23.8
P61160	Actin-related protein 2	ACTR2	23.6517	24.4422	24.0469	24.4788	24.4688	24.4738	24.9934	24.205	24.5992	-0.42687	0.125385	-0.552255	0.743874	1.0908	0.681953		15	15	15	43.1	43.1	43.1	44.76	229.12	197810000	145	6	8	9	9	11	10	6	8	9	9	11	10	6	8	9	9	11	10	18.3	24.4	27.2
P35606	Coatomer subunit beta	COPB2	24.1827	24.736	24.4594	24.3699	24.5707	24.4703	24.1549	24.3998	24.2773	-0.01098	-0.193	0.18202	0.992418	0.874785	1.13447		40	40	40	57.4	57.4	57.4	102.49	323.31	151820000	231	17	20	12	12	30	24	17	20	12	12	30	24	17	20	12	12	30	24	22.1	27.5	13.2
P49915	GMP synthase [glutamine-hydrolyzing]	GMPS	23.5608	23.9315	23.7461	24.1615	24.8632	24.5124	24.7691	25.0831	24.9261	-0.766225	0.41373	-1.17995	0.587954	1.33213	0.441365		36	36	36	55.6	55.6	55.6	76.715	171.43	181230000	203	9	9	12	11	17	22	9	9	12	11	17	22	9	9	12	11	17	22	15.6	14.7	21.5
Q12906	Interleukin enhancer-binding factor 3	ILF3	24.5808	23.5577	24.0692	24.8663	24.7953	24.8308	24.247	24.2611	24.2541	-0.76154	-0.576735	-0.184805	0.589866	0.670479	0.879768		25	25	22	35	35	33.1	95.337	175.93	202910000	242	14	9	12	13	21	18	14	9	12	13	21	18	13	9	11	13	20	16	18.1	11.7	16
P52292	Importin subunit alpha-1	KPNA2	24.6563	24.0247	24.3405	24.737	24.4495	24.5932	23.7426	23.8139	23.7783	-0.252755	-0.81497	0.562215	0.839292	0.56842	1.47653		17	17	17	47.8	47.8	47.8	57.861	299.71	177410000	154	11	8	10	9	11	15	11	8	10	9	11	15	11	8	10	9	11	15	27.2	18.1	23.4
P35270	Sepiapterin reductase	SPR	24.2442	23.8559	24.0501	24.4183	23.935	24.1766	24.1343	24.2724	24.2034	-0.12658	0.026725	-0.153305	0.916	1.0187	0.899188		12	12	12	54.4	54.4	54.4	28.048	82.646	97891000	107	5	4	10	7	10	9	5	4	10	7	10	9	5	4	10	7	10	9	23.8	16.9	50.2
P27824	Calnexin	CANX	25.0375	23.5805	24.309	24.7572	24.5708	24.664	24.0331	24.2549	24.144	-0.35501	-0.520025	0.165015	0.781864	0.69736	1.12118		27	27	27	39.5	39.5	39.5	67.567	276.38	234850000	206	18	12	20	14	14	9	18	12	20	14	14	9	18	12	20	14	14	9	34.1	23.3	33.6
P17980	26S protease regulatory subunit 6A	PSMC3	24.5619	24.0338	24.2978	24.837	24.7176	24.7773	24.1246	24.3734	24.249	-0.479445	-0.52824	0.048795	0.717253	0.6934	1.0344		25	25	25	64.9	64.9	64.9	49.203	191.44	222570000	234	19	10	15	15	12	18	19	10	15	15	12	18	19	10	15	15	12	18	52.2	28.2	43.3
P26599	Polypyrimidine tract-binding protein 1	PTBP1	24.3251	23.782	24.0535	24.5901	23.9089	24.2495	24.0395	24.1413	24.0904	-0.19602	-0.15911	-0.03691	0.872955	0.895577	0.97474		14	14	12	38.2	38.2	34.8	57.221	133.75	96052000	152	7	3	8	6	12	11	7	3	8	6	12	11	6	1	6	4	11	10	17.9	5.5	19.8
Q9ULZ3	Apoptosis-associated speck-like protein containing a CARD	PYCARD	24.6566	24.1525	24.4046	24.9122	23.7186	24.3154	24.3025	24.1158	24.2092	0.089175	-0.10621	0.195385	1.06376	0.929025	1.14503		10	10	10	40.5	40.5	40.5	21.627	165.68	53729000	82	4	2	4	4	9	10	4	2	4	4	9	10	4	2	4	4	9	10	16.4	11.8	16.4
Q9NQR4	Omega-amidase NIT2	NIT2	24.5283	24.0143	24.2713	25.1757	23.7373	24.4565	24.2218	24.4936	24.3577	-0.18522	-0.098775	-0.086445	0.879515	0.933826	0.941841		20	20	20	83.7	83.7	83.7	30.608	250.46	114920000	140	8	9	9	7	14	15	8	9	9	7	14	15	8	9	9	7	14	15	40.6	40.6	46.4
P48556	26S proteasome non-ATPase regulatory subunit 8	PSMD8	24.498	24.18	24.339	24.4285	23.7421	24.0853	24.4138	24.6423	24.5281	0.253695	0.442735	-0.18904	1.19226	1.35918	0.877189		11	11	11	36.6	36.6	36.6	39.611	49.031	114310000	57	5	4	4	6	8	8	5	4	4	6	8	8	5	4	4	6	8	8	12	9.1	9.1
Q96EK6	Glucosamine 6-phosphate N-acetyltransferase	GNPNAT1	24.6624	24.0453	24.3539	24.0051	22.9875	23.4963	25.071	24.3693	24.7202	0.857595	1.22393	-0.366335	1.81202	2.33582	0.775751		11	11	11	66.8	66.8	66.8	20.749	120.5	58167000	81	7	3	2	6	10	7	7	3	2	6	10	7	7	3	2	6	10	7	45.7	14.1	13
Q15631	Translin	TSN	24.4212	24.2494	24.3353	24.0651	24.4549	24.26	25.2259	24.6118	24.9189	0.07528	0.65882	-0.58354	1.05357	1.57879	0.667324		16	16	16	61.4	61.4	61.4	26.183	129.53	98951000	85	6	3	6	6	13	12	6	3	6	6	13	12	6	3	6	6	13	12	26.8	13.6	24.1
Q14203;E7EWF7	Dynactin subunit 1	DCTN1	24.0617	24.1417	24.1017	24.4987	24.0856	24.2922	25.1884	24.6829	24.9357	-0.190455	0.64352	-0.833975	0.876329	1.56214	0.560981		56	56	56	51.8	51.8	51.8	141.69	323.31	154570000	290	22	17	26	20	50	35	22	17	26	20	50	35	22	17	26	20	50	35	19	16	24.3
O15145	Actin-related protein 2/3 complex subunit 3	ARPC3	25.2759	23.8084	24.5421	23.7751	23.8594	23.8172	25.0524	24.8804	24.9664	0.724935	1.1492	-0.424265	1.65283	2.21791	0.745218		10	10	10	65.7	65.7	65.7	20.546	101.85	72674000	70	9	3	2	4	8	5	9	3	2	4	8	5	9	3	2	4	8	5	48.3	17.4	11.2
P61081	NEDD8-conjugating enzyme Ubc12	UBE2M	24.6816	24.6874	24.6845	24.0794	24.569	24.3242	24.5903	24.5712	24.5808	0.36028	0.256555	0.103725	1.28368	1.19462	1.07454		7	7	7	36.1	36.1	36.1	20.9	63.828	60141000	78	6	5	4	5	7	5	6	5	4	5	7	5	6	5	4	5	7	5	35.5	26.8	20.8
Q92499	ATP-dependent RNA helicase DDX1	DDX1	24.9896	24.1639	24.5767	24.5462	24.5587	24.5524	24.5258	24.2548	24.3903	0.024335	-0.162095	0.18643	1.01701	0.893726	1.13794		35	35	35	54.7	54.7	54.7	82.431	263.52	226040000	150	15	10	11	10	24	20	15	10	11	10	24	20	15	10	11	10	24	20	22.6	14.5	16.1
Q16543	Hsp90 co-chaperone Cdc37;Hsp90 co-chaperone Cdc37, N-terminally processed	CDC37	24.5845	24.0437	24.3141	24.676	24.1958	24.4359	24.7331	24.949	24.841	-0.12178	0.40517	-0.52695	0.919053	1.32424	0.69402		18	18	18	44.7	44.7	44.7	44.468	134.87	209460000	190	14	9	9	11	7	7	14	9	9	11	7	7	14	9	9	11	7	7	42.1	28.3	28
Q14152	Eukaryotic translation initiation factor 3 subunit A	EIF3A	24.4185	24.3021	24.3603	24.6157	24.4199	24.5178	24.489	24.359	24.424	-0.15752	-0.09379	-0.06373	0.896565	0.937058	0.956787		41	41	41	33.4	33.4	33.4	166.57	252.11	208060000	329	28	19	19	19	32	23	28	19	19	19	32	23	28	19	19	19	32	23	20.8	14.4	12.6
P62333	26S protease regulatory subunit 10B	PSMC6	24.7671	24.3901	24.5786	24.8187	24.1262	24.4725	24.2285	24.4736	24.351	0.106165	-0.12143	0.227595	1.07636	0.919276	1.17088		23	23	23	63.8	63.8	63.8	44.172	131.67	206820000	157	13	12	15	11	14	16	13	12	15	11	14	16	13	12	15	11	14	16	39.3	33.4	41.1
P22061	Protein-L-isoaspartate(D-aspartate) O-methyltransferase	PCMT1	24.4296	24.3251	24.3773	24.4554	23.9236	24.1895	24.7723	24.0098	24.391	0.187845	0.201545	-0.0137	1.13906	1.14993	0.990549		13	13	13	66.1	66.1	66.1	24.636	107.2	66335000	62	7	3	4	3	13	11	7	3	4	3	13	11	7	3	4	3	13	11	28.2	8.8	16.3
P54578	Ubiquitin carboxyl-terminal hydrolase 14	USP14	24.6404	24.3261	24.4832	24.6729	24.4827	24.5778	24.9074	24.307	24.6072	-0.094605	0.02938	-0.123985	0.936529	1.02057	0.917649		23	23	23	58.5	58.5	58.5	56.068	323.31	202310000	214	14	10	10	12	16	15	14	10	10	12	16	15	14	10	10	12	16	15	39.5	23.3	23.5
Q9Y3U8	60S ribosomal protein L36	RPL36	25.9095	19.5222	22.7158	25.2048	25.9737	25.5892	25.0829	25.1409	25.1119	-2.8734	-0.477345	-2.39606	0.136464	0.718298	0.189983		4	4	4	30.5	30.5	30.5	12.254	14.463	81754000	82	3	1	3	3	4	4	3	1	3	3	4	4	3	1	3	3	4	4	28.6	9.5	28.6
P62081	40S ribosomal protein S7	RPS7	24.2329	18.1496	21.1913	25.3691	24.9574	25.1632	26.3849	26.2696	26.3272	-3.97198	1.164	-5.13598	0.0637257	2.24078	0.0284391		16	16	16	66.5	66.5	66.5	22.127	69.378	109630000	84	4	1	4	3	13	12	4	1	4	3	13	12	4	1	4	3	13	12	20.1	4.1	18.6
P06748	Nucleophosmin	NPM1	25.3894	18.0292	21.7093	25.7175	25.8509	25.7842	25.8311	25.7248	25.7779	-4.0749	-0.006295	-4.0686	0.0593382	0.995646	0.0595977		8	8	8	32.3	32.3	32.3	32.575	172.94	139130000	162	4	1	2	2	7	7	4	1	2	2	7	7	4	1	2	2	7	7	14.6	3.1	7.5
P50914	60S ribosomal protein L14	RPL14	25.4201	19.0998	22.26	24.6623	24.4781	24.5702	25.0604	26.4706	25.7655	-2.31024	1.19532	-3.50556	0.201627	2.28995	0.0880487		4	4	4	20.9	20.9	20.9	23.432	46.402	129710000	146	4	1	4	4	4	4	4	1	4	4	4	4	4	1	4	4	4	4	20.9	5.1	20.9
A0A0U1RRH7;Q99878;Q96KK5;Q9BTM1;P20671;P0C0S8;P16104;Q96QV6	Histone H2A type 1-J;Histone H2A type 1-H;Histone H2A.J;Histone H2A type 1-D;Histone H2A type 1;Histone H2AX	HIST1H2AJ;HIST1H2AH;H2AFJ;HIST1H2AD;HIST1H2AG;H2AFX	26.7915	18.8074	22.7995	27.5788	24.9008	26.2398	30.1004	29.7658	29.9331	-3.44029	3.69328	-7.13357	0.0921233	12.9356	0.00712169		7	7	0	44.1	44.1	0	18.552	159.49	670000000	229	4	1	3	4	6	7	4	1	3	4	6	7	0	0	0	0	0	0	27.1	5.3	20.6
P12035	Keratin, type II cytoskeletal 3	KRT3	27.9448	23.2911	25.618	24.7888	20.5002	22.6445	25.1871	18.1236	21.6553	2.97345	-0.989185	3.96263	7.85409	0.503762	15.5909		24	9	5	23.4	12.9	8.1	64.416	29.419	256430000	33	14	12	13	7	13	10	7	4	2	0	3	2	3	1	0	0	0	1	16.6	12.1	10.7
P06753	Tropomyosin alpha-3 chain	TPM3	24.4895	17.7124	21.101	23.8542	18.7541	21.3041	24.2606	18.1193	21.19	-0.203155	-0.114145	-0.08901	0.868649	0.92393	0.940168		16	7	7	40.4	21.8	21.8	32.95	84.32	97732000	31	11	3	4	3	13	3	6	1	2	1	5	0	6	1	2	1	5	0	35.1	11.2	15.8
P14174	Macrophage migration inhibitory factor	MIF	22.233	21.8394	22.0362	18.3968	21.5145	19.9557	27.2707	26.579	26.9249	2.08052	6.96921	-4.88869	4.2296	125.297	0.0337565		4	4	4	36.5	36.5	36.5	12.476	22.655	41568000	50	2	2	1	2	4	3	2	2	1	2	4	3	2	2	1	2	4	3	17.4	17.4	9.6
P62304	Small nuclear ribonucleoprotein E	SNRPE	21.9236	22.0435	21.9836	18.7054	22.3161	20.5108	24.8325	24.5243	24.6784	1.47281	4.16763	-2.69482	2.77561	17.9714	0.154446		3	3	3	38	38	38	10.803	26.085	17321000	38	2	2	1	2	3	3	2	2	1	2	3	3	2	2	1	2	3	3	25	25	13
Q15369	Transcription elongation factor B polypeptide 1	TCEB1	23.0272	17.7655	20.3964	18.2999	18.0043	18.1521	24.2185	24.0364	24.1275	2.24428	5.97537	-3.73109	4.73801	62.9164	0.0753063		7	7	7	66.1	66.1	66.1	12.473	22.1	11188000	33	4	3	1	1	5	5	4	3	1	1	5	5	4	3	1	1	5	5	49.1	28.6	12.5
P62318	Small nuclear ribonucleoprotein Sm D3	SNRPD3	24.2043	19.1593	21.6818	18.5837	17.9562	18.27	25.7265	26.4575	26.092	3.41181	7.82202	-4.41022	10.6428	226.289	0.0470318		4	4	4	47.6	47.6	47.6	13.916	41.241	59902000	64	2	1	1	1	4	4	2	1	1	1	4	4	2	1	1	1	4	4	15.1	7.9	7.9
P62266	40S ribosomal protein S23	RPS23	21.3581	19.5862	20.4722	18.3648	19.1416	18.7532	25.6023	25.2023	25.4023	1.71897	6.64913	-4.93015	3.29201	100.366	0.0328001		6	6	6	41.3	41.3	41.3	15.807	24.335	30545000	43	2	1	1	2	5	5	2	1	1	2	5	5	2	1	1	2	5	5	15.4	7.7	7.7
P62158;P27482;P02585	Calmodulin	CALM1	23.3589	18.7677	21.0633	19.1562	19.8861	19.5212	25.514	25.4624	25.4882	1.54212	5.96705	-4.42493	2.91223	62.5549	0.0465548		9	9	9	52.3	52.3	52.3	16.837	51.209	22170000	40	5	0	0	1	7	6	5	0	0	1	7	6	5	0	0	1	7	6	25.5	0	0
P61457	Pterin-4-alpha-carbinolamine dehydratase	PCBD1	24.0281	18.9757	21.5019	18.0526	18.456	18.2543	25.5035	24.867	25.1852	3.24756	6.93089	-3.68333	9.49755	122.013	0.0778405		7	7	7	73.1	73.1	73.1	11.999	38.135	18880000	21	2	1	1	1	5	5	2	1	1	1	5	5	2	1	1	1	5	5	17.3	9.6	9.6
P42766	60S ribosomal protein L35	RPL35	24.8991	18.8009	21.85	19.3642	18.9982	19.1812	25.4866	25.7067	25.5967	2.66882	6.41549	-3.74667	6.35909	85.3601	0.0744972		4	4	4	22.8	22.8	22.8	14.551	163.27	74866000	59	2	1	1	1	4	3	2	1	1	1	4	3	2	1	1	1	4	3	11.4	8.1	8.1
P42330;P17516	Aldo-keto reductase family 1 member C3	AKR1C3	22.4129	18.7799	20.5964	18.2265	18.8726	18.5495	25.6029	25.3191	25.461	2.0469	6.91144	-4.86454	4.13216	120.379	0.0343262		21	12	12	66.3	46.4	46.4	36.853	152.87	67765000	44	11	9	5	4	19	14	3	2	0	0	11	6	3	2	0	0	11	6	27.6	22.9	12.4
P32969	60S ribosomal protein L9	RPL9	22.1471	17.0582	19.6026	18.5871	19.1104	18.8487	24.6804	25.2536	24.967	0.753925	6.11825	-5.36433	1.68637	69.4667	0.024276		14	14	14	68.8	68.8	68.8	21.863	48.89	31292000	64	4	1	1	1	12	13	4	1	1	1	12	13	4	1	1	1	12	13	28.1	5.2	5.2
Q16778;P33778;P23527;Q8N257;P06899;Q96A08	Histone H2B type 2-E;Histone H2B type 1-B;Histone H2B type 1-O;Histone H2B type 3-B;Histone H2B type 1-J;Histone H2B type 1-A	HIST2H2BE;HIST1H2BB;HIST1H2BO;HIST3H2BB;HIST1H2BJ;HIST1H2BA	23.325	18.4094	20.8672	19.6742	18.3926	19.0334	25.5264	24.8246	25.1755	1.83379	6.14207	-4.30828	3.56472	70.6232	0.0504753		10	2	0	57.1	7.9	0	13.92	4.4613	40588000	15	6	3	6	5	6	5	2	1	1	1	2	2	0	0	0	0	0	0	42.1	23	40.5
P30046;A6NHG4	D-dopachrome decarboxylase;D-dopachrome decarboxylase-like protein	DDT;DDTL	24.3701	19.1276	21.7488	18.8794	18.7057	18.7925	25.5485	25.0745	25.3115	2.95631	6.519	-3.5627	7.76136	91.7099	0.0846295		8	8	8	63.6	63.6	63.6	12.712	43.236	56577000	41	2	1	1	1	8	8	2	1	1	1	8	8	2	1	1	1	8	8	19.5	6.8	6.8
P68036;A0A1B0GUS4	Ubiquitin-conjugating enzyme E2 L3	UBE2L3	23.7338	17.8253	20.7795	18.2465	23.8791	21.0628	24.3712	25.4391	24.9052	-0.28331	3.84234	-4.12565	0.821704	14.3437	0.0572867		11	11	11	72.7	72.7	72.7	17.861	66.778	37492000	55	4	1	0	3	9	6	4	1	0	3	9	6	4	1	0	3	9	6	22.7	5.8	0
P63279	SUMO-conjugating enzyme UBC9	UBE2I	24.5931	18.7204	21.6567	19.1827	22.2692	20.7259	23.9063	23.2022	23.5542	0.93079	2.82829	-1.8975	1.90632	7.10232	0.268408		8	8	8	76.6	76.6	76.6	18.007	26.176	23102000	35	4	0	1	2	7	4	4	0	1	2	7	4	4	0	1	2	7	4	22.2	0	6.3
P61326;Q96A72	Protein mago nashi homolog;Protein mago nashi homolog 2	MAGOH;MAGOHB	24.8222	18.8539	21.8381	18.221	24.018	21.1195	24.5888	25.3985	24.9936	0.718555	3.87413	-3.15557	1.64553	14.6632	0.112222		10	10	10	76	76	76	17.163	38.251	38125000	63	3	1	1	2	9	8	3	1	1	2	9	8	3	1	1	2	9	8	21.2	7.5	7.5
P37108	Signal recognition particle 14 kDa protein	SRP14	23.7601	18.7557	21.2579	18.6196	23.2307	20.9252	23.6578	23.711	23.6844	0.33274	2.75924	-2.4265	1.2594	6.77037	0.186017		7	7	7	44.1	44.1	44.1	14.57	179.4	20194000	51	5	1	0	5	6	5	5	1	0	5	6	5	5	1	0	5	6	5	34.6	8.8	0
P36405	ADP-ribosylation factor-like protein 3	ARL3	23.348	18.479	20.9135	20.0359	22.2087	21.1223	23.9976	24.2087	24.1031	-0.208785	2.98081	-3.1896	0.865266	7.89432	0.109606		8	8	8	73.6	73.6	73.6	20.455	50.404	25596000	57	5	1	2	3	8	4	5	1	2	3	8	4	5	1	2	3	8	4	40.7	6	11.5
P08708	40S ribosomal protein S17	RPS17	23.1975	19.9465	21.572	19.1527	21.9482	20.5504	24.686	24.6516	24.6688	1.02157	4.11838	-3.09681	2.03012	17.3682	0.116887		7	7	7	52.6	52.6	52.6	15.55	65.726	30122000	70	3	1	1	2	7	5	3	1	1	2	7	5	3	1	1	2	7	5	16.3	8.1	8.1
P13693;Q56UQ5	Translationally-controlled tumor protein	TPT1	22.8357	18.4611	20.6484	18.9953	21.4154	20.2053	25.3598	25.1653	25.2626	0.44305	5.05723	-4.61418	1.35948	33.295	0.0408312		8	8	8	52.3	52.3	52.3	19.595	85.714	33620000	53	6	0	1	4	7	7	6	0	1	4	7	7	6	0	1	4	7	7	38.4	0	4.1
Q9BTT0	Acidic leucine-rich nuclear phosphoprotein 32 family member E	ANP32E	22.264	21.856	22.06	20.5852	18.7049	19.645	22.664	19.2035	20.9337	2.41494	1.2887	1.12625	5.33299	2.44308	2.1829		6	6	6	27.2	27.2	27.2	30.692	68.493	23603000	37	4	2	4	1	4	1	4	2	4	1	4	1	4	2	4	1	4	1	17.2	9.3	14.2
Q9H3K6;H3BVE0	BolA-like protein 2	BOLA2	22.5412	23.6472	23.0942	18.5314	18.1626	18.347	25.1876	18.8946	22.0411	4.7472	3.69411	1.05309	26.8565	12.9431	2.07497	+	3	3	3	51.2	51.2	51.2	10.116	6.7233	20945000	17	2	2	1	1	3	0	2	2	1	1	3	0	2	2	1	1	3	0	29.1	29.1	18.6
Q9UBQ0	Vacuolar protein sorting-associated protein 29	VPS29	22.6889	24.0065	23.3477	18.8612	18.6595	18.7603	23.5075	22.4363	22.9719	4.58734	4.21158	0.37577	24.0397	18.5272	1.29753	+	7	7	7	50	50	50	20.505	57.362	27504000	52	4	2	1	1	5	2	4	2	1	1	5	2	4	2	1	1	5	2	22.5	11	7.1
O00625	Pirin	PIR	23.0722	22.951	23.0116	18.6542	18.7281	18.6911	22.9549	22.7211	22.838	4.32042	4.14682	0.1736	19.9791	17.714	1.12787	+	9	9	9	36.2	36.2	36.2	32.113	52.808	43866000	45	5	4	1	1	8	5	5	4	1	1	8	5	5	4	1	1	8	5	18.6	13.8	3.4
O60218;C9JRZ8	Aldo-keto reductase family 1 member B10	AKR1B10	23.8442	22.7043	23.2743	18.7702	19.2808	19.0255	22.2633	22.3461	22.3047	4.24877	3.27922	0.96955	19.011	9.70828	1.95823	+	12	12	12	46.5	46.5	46.5	36.019	27.776	34947000	41	10	4	0	0	6	5	10	4	0	0	6	5	10	4	0	0	6	5	37	13	0
P19013	Keratin, type II cytoskeletal 4	KRT4	24.6212	22.7716	23.6964	21.3837	16.5147	18.9492	20.6014	19.4073	20.0043	4.74714	1.0551	3.69204	26.8553	2.07786	12.9245		21	15	13	36.9	29.2	25.3	57.285	69.7	30639000	47	19	12	8	3	9	4	14	7	4	1	4	0	12	6	4	1	3	0	34.6	22.3	15.5
P18085	ADP-ribosylation factor 4	ARF4	24.8971	25.4183	25.1577	18.462	18.4862	18.4741	22.6195	24.3897	23.5046	6.6836	5.0305	1.6531	102.793	32.6836	3.1451	+	9	4	4	57.2	27.2	27.2	20.511	38.398	49381000	50	3	3	2	3	9	8	2	2	1	2	4	3	2	2	1	2	4	3	20	20	11.7
P21964	Catechol O-methyltransferase	COMT	24.7632	25.3734	25.0683	18.4294	18.2116	18.3205	25.5461	26.5026	26.0243	6.74784	7.70386	-0.956015	107.474	208.493	0.515479	+	19	19	19	68.3	68.3	68.3	30.037	186.64	82806000	112	2	2	1	1	13	17	2	2	1	1	13	17	2	2	1	1	13	17	10.7	7.4	4.4
Q99584	Protein S100-A13	S100A13	18.5385	17.9092	18.2238	23.7797	21.902	22.8408	22.8168	22.8136	22.8152	-4.61701	-0.025645	-4.59137	0.0407513	0.982381	0.0414822	+	3	3	3	32.7	32.7	32.7	11.471	14.992	8509400	22	1	1	2	2	2	3	1	1	2	2	2	3	1	1	2	2	2	3	11.2	11.2	20.4
Q13283	Ras GTPase-activating protein-binding protein 1	G3BP1	18.1985	18.2523	18.2254	22.3054	21.313	21.8092	21.9136	22.0447	21.9792	-3.58372	0.170005	-3.75373	0.0834051	1.12506	0.0741338	+	9	9	9	30.3	30.3	30.3	52.164	79.401	21780000	50	2	2	5	4	6	4	2	2	5	4	6	4	2	2	5	4	6	4	5.4	9.2	13.1
P62820	Ras-related protein Rab-1A	RAB1A	18.1122	18.3693	18.2408	22.3398	22.2699	22.3049	23.2311	22.5199	22.8755	-4.06411	0.57059	-4.63471	0.0597832	1.48513	0.0402545	+	14	6	6	78.5	42.4	42.4	22.677	130.12	13267000	50	5	5	6	6	11	9	1	1	2	3	3	4	1	1	2	3	3	4	29.3	26.8	31.2
P48047;H7C0C1	ATP synthase subunit O, mitochondrial	ATP5O	18.6034	18.4271	18.5152	23.0157	22.44	22.7279	22.4753	22.051	22.2631	-4.21264	-0.46473	-3.7479	0.053935	0.724607	0.0744335	+	7	7	7	46.5	46.5	46.5	23.277	35.69	13447000	34	1	1	4	6	4	2	1	1	4	6	4	2	1	1	4	6	4	2	5.2	5.2	25.4
A0A0A6YYL6;P18621	60S ribosomal protein L17	RPL17-C18orf32;RPL17	18.2919	18.8964	18.5941	23.6853	22.8072	23.2462	25.0551	23.2683	24.1617	-4.65207	0.91546	-5.56753	0.039773	1.88617	0.0210867	+	10	10	10	32.5	32.5	32.5	26.372	58.911	28882000	46	2	0	2	4	10	3	2	0	2	4	10	3	2	0	2	4	10	3	7.9	0	7.9
P43243	Matrin-3	MATR3	17.9474	16.976	17.4617	21.0402	21.6724	21.3563	23.4378	23.0546	23.2462	-3.89461	1.88993	-5.78454	0.0672363	3.70616	0.0181418	+	22	22	22	32.1	32.1	32.1	94.622	167.99	25879000	84	2	1	4	3	20	12	2	1	4	3	20	12	2	1	4	3	20	12	2.5	1.2	5.2
P82914	28S ribosomal protein S15, mitochondrial	MRPS15	17.8041	20.8045	19.3043	20.8837	22.0764	21.4801	19.1609	17.5994	18.3802	-2.17576	-3.09992	0.924165	0.221325	0.116635	1.89759		5	5	5	18.3	18.3	18.3	29.842	9.4166	3519400	18	1	2	2	5	1	1	1	2	2	5	1	1	1	2	2	5	1	1	3.5	6.2	7.4
Q96AY3	Peptidyl-prolyl cis-trans isomerase FKBP10	FKBP10	17.8859	20.3466	19.1162	21.1804	21.1471	21.1637	19.1524	18.3303	18.7414	-2.04749	-2.42235	0.374865	0.241905	0.186552	1.29672		6	6	6	11.7	11.7	11.7	64.244	11.919	9368400	15	1	2	6	3	0	0	1	2	6	3	0	0	1	2	6	3	0	0	2.9	3.6	11.7
Q8TB61	Adenosine 3-phospho 5-phosphosulfate transporter 1	SLC35B2	18.1466	20.4499	19.2982	21.6392	20.876	21.2576	19.6238	18.327	18.9754	-1.95936	-2.28218	0.32282	0.257142	0.205586	1.25077		4	4	4	10.9	10.9	10.9	47.514	20.743	7629400	17	2	3	2	3	2	0	2	3	2	3	2	0	2	3	2	3	2	0	6	7.6	5.1
Q13642	Four and a half LIM domains protein 1	FHL1	17.038	20.5404	18.7892	20.9407	21.2889	21.1148	20.3109	19.0002	19.6556	-2.32559	-1.45924	-0.86635	0.199492	0.363683	0.548533		7	7	7	29.7	29.7	29.7	36.263	18.848	6486300	22	1	3	2	4	5	3	1	3	2	4	5	3	1	3	2	4	5	3	3.7	9.6	6.5
O96000	NADH dehydrogenase [ubiquinone] 1 beta subcomplex subunit 10	NDUFB10	17.7116	20.4992	19.1054	22.2145	20.7934	21.5039	20.0596	18.8317	19.4457	-2.39853	-2.05826	-0.340265	0.189658	0.240105	0.789896		4	4	4	26.7	26.7	26.7	20.776	9.7689	3821300	22	1	3	3	3	3	0	1	3	3	3	3	0	1	3	3	3	3	0	6.4	18.6	18.6
P13674	Prolyl 4-hydroxylase subunit alpha-1	P4HA1	18.36	20.1942	19.2771	20.8246	20.3014	20.563	20.2565	18.7294	19.4929	-1.28591	-1.07008	-0.215835	0.410111	0.476293	0.861048		6	6	6	14.4	14.4	14.4	61.049	24.377	6102300	16	0	1	4	4	3	1	0	1	4	4	3	1	0	1	4	4	3	1	0	2.6	9.4
Q9H7C9	Mth938 domain-containing protein	AAMDC	18.5638	21.3351	19.9494	22.0122	22.0743	22.0433	18.3216	19.9934	19.1575	-2.0938	-2.88574	0.791935	0.234263	0.135303	1.7314		4	4	4	32	32	32	13.332	11.106	3958000	17	1	2	3	4	0	1	1	2	3	4	0	1	1	2	3	4	0	1	9	16.4	23.8
Q96HR9	Receptor expression-enhancing protein 6	REEP6	17.6891	21.644	19.6666	22.0575	21.5242	21.7909	18.3997	19.2816	18.8406	-2.12434	-2.95026	0.82592	0.229356	0.129385	1.77267		3	3	3	16.8	16.8	16.8	20.733	8.7815	5607200	16	1	2	2	2	2	2	1	2	2	2	2	2	1	2	2	2	2	2	5.4	9.8	9.8
Q8NFH4	Nucleoporin Nup37	NUP37	18.8244	21.4843	20.1544	21.3914	22.0113	21.7014	19.009	19.6435	19.3262	-1.54697	-2.37514	0.82817	0.342228	0.192758	1.77543		6	6	6	26.1	26.1	26.1	36.707	20.181	11640000	20	1	2	2	2	4	4	1	2	2	2	4	4	1	2	2	2	4	4	2.8	6.1	6.1
P84103	Serine/arginine-rich splicing factor 3	SRSF3	18.8736	20.7805	19.8271	22.0512	22.1589	22.105	17.5228	19.1421	18.3325	-2.27799	-3.7726	1.49461	0.206185	0.0731702	2.81788		5	4	4	33.5	33.5	33.5	19.329	10.134	13766000	38	1	2	2	2	4	3	1	2	2	2	3	2	1	2	2	2	3	2	5.5	10.4	10.4
P21926	CD9 antigen	CD9	17.6056	21.4034	19.5045	21.6896	20.9584	21.324	17.6966	18.4739	18.0853	-1.81954	-3.23875	1.41921	0.283312	0.105935	2.67439		6	6	6	25.4	25.4	25.4	25.416	13.929	9605600	16	1	3	4	3	0	1	1	3	4	3	0	1	1	3	4	3	0	1	4.4	9.6	9.6
P16219	Short-chain specific acyl-CoA dehydrogenase, mitochondrial	ACADS	19.108	21.4397	20.2738	21.127	21.4146	21.2708	19.1447	19.0956	19.1201	-0.996955	-2.15067	1.15372	0.501056	0.225208	2.22486		8	8	8	24.8	24.8	24.8	44.297	55.681	11177000	25	0	5	7	5	1	1	0	5	7	5	1	1	0	5	7	5	1	1	0	14.6	23.1
O43402	ER membrane protein complex subunit 8	EMC8	17.8268	21.6898	19.7583	20.9855	21.8988	21.4421	17.8785	19.4871	18.6828	-1.68382	-2.75934	1.07551	0.311256	0.147692	2.10747		4	4	4	18.6	18.6	18.6	23.773	6.5029	4125500	14	1	2	3	3	0	0	1	2	3	3	0	0	1	2	3	3	0	0	4.3	8.1	13.8
P04899;P63096;P11488;P09471;P19087;A8MTJ3;P38405	Guanine nucleotide-binding protein G(i) subunit alpha-2;Guanine nucleotide-binding protein G(i) subunit alpha-1	GNAI2;GNAI1	18.264	20.7389	19.5015	21.3968	21.4961	21.4465	16.8125	18.3566	17.5846	-1.94502	-3.8619	1.91688	0.259711	0.0687784	3.77606		9	4	4	29.9	14.9	14.9	40.45	22.57	9601900	16	4	3	6	6	6	3	1	2	3	3	2	1	1	2	3	3	2	1	13	10.4	18.9
P30876	DNA-directed RNA polymerase II subunit RPB2	POLR2B	18.3142	18.6906	18.5024	22.1218	21.8678	21.9948	21.7381	19.2779	20.508	-3.49242	-1.48679	-2.00563	0.0888543	0.356807	0.249026	+	25	25	25	25	25	25	133.9	82.506	16446000	52	3	1	13	10	19	0	3	1	13	10	19	0	3	1	13	10	19	0	3.2	1	12.2
O60264;P28370	SWI/SNF-related matrix-associated actin-dependent regulator of chromatin subfamily A member 5	SMARCA5	17.0215	18.7708	17.8961	22.1328	21.694	21.9134	21.9764	18.7773	20.3768	-4.0173	-1.53659	-2.48071	0.061755	0.344699	0.179156	+	25	25	25	24.5	24.5	24.5	121.9	172.34	18807000	51	2	0	8	11	20	1	2	0	8	11	20	1	2	0	8	11	20	1	1.5	0	6.9
P19174	1-phosphatidylinositol 4,5-bisphosphate phosphodiesterase gamma-1	PLCG1	18.8596	19.9543	19.407	20.87	21.7799	21.325	22.3924	18.5263	20.4594	-1.918	-0.8656	-1.0524	0.264621	0.548818	0.482165		27	27	27	27	27	27	148.53	91.523	15977000	58	3	5	5	11	19	3	3	5	5	11	19	3	3	5	5	11	19	3	3.1	4.4	4.7
O15382	Branched-chain-amino-acid aminotransferase, mitochondrial	BCAT2	19.3234	22.6293	20.9764	22.3046	23.2475	22.7761	17.6558	20.2893	18.9726	-1.79969	-3.80351	2.00382	0.287235	0.0716192	4.01059		11	11	11	37.2	37.2	37.2	44.287	28.323	25835000	29	1	3	3	5	6	5	1	3	3	5	6	5	1	3	3	5	6	5	1.8	10.7	8.9
Q9H3N1	Thioredoxin-related transmembrane protein 1	TMX1	19.5523	23.3748	21.4635	23.3914	22.9527	23.172	19.3013	19.2986	19.3	-1.70848	-3.87207	2.16359	0.305981	0.0682953	4.48027		3	3	3	10.7	10.7	10.7	31.791	16.046	25997000	36	1	2	2	3	1	1	1	2	2	3	1	1	1	2	2	3	1	1	4.3	7.1	7.1
P07305	Histone H1.0;Histone H1.0, N-terminally processed	H1F0	17.4868	22.4937	19.9902	23.7361	23.3736	23.5549	18.9002	17.9466	18.4234	-3.56462	-5.13144	1.56682	0.0845164	0.0285286	2.96251		2	2	2	9.8	9.8	9.8	20.863	7.7098	10126000	41	1	2	2	2	0	0	1	2	2	2	0	0	1	2	2	2	0	0	5.2	9.8	9.8
P30049	ATP synthase subunit delta, mitochondrial	ATP5D	18.32	22.7792	20.5496	23.7348	24.2568	23.9958	18.7401	19.2488	18.9944	-3.44619	-5.00139	1.55521	0.0917476	0.0312198	2.93877		2	2	2	13.7	13.7	13.7	17.49	31.699	12218000	18	1	2	2	2	1	1	1	2	2	2	1	1	1	2	2	2	1	1	8.3	13.7	13.7
Q7RTV0	PHD finger-like domain-containing protein 5A	PHF5A	18.9589	22.3206	20.6398	22.9448	22.7764	22.8606	19.7903	19.1703	19.4803	-2.22086	-3.38035	1.15948	0.214513	0.0960317	2.23377		4	4	4	40	40	40	12.405	21.494	6722600	20	2	3	2	4	2	1	2	3	2	4	2	1	2	3	2	4	2	1	26.4	25.5	19.1
Q9BQ69	O-acetyl-ADP-ribose deacetylase MACROD1	MACROD1	17.6394	21.2435	19.4415	22.3967	22.5939	22.4953	21.235	18.9058	20.0704	-3.05382	-2.42488	-0.62893	0.120423	0.186225	0.646656		4	4	4	17.8	17.8	17.8	35.505	20.25	22582000	14	1	2	2	2	3	2	1	2	2	2	3	2	1	2	2	2	3	2	3.4	6.5	6.5
P11279	Lysosome-associated membrane glycoprotein 1	LAMP1	16.7649	23.0673	19.9161	21.2793	22.8908	22.085	20.3006	20.2662	20.2834	-2.16895	-1.80159	-0.367355	0.222373	0.286858	0.775202		6	6	6	13.7	13.7	13.7	44.882	21.499	32216000	27	1	4	3	3	4	2	1	4	3	3	4	2	1	4	3	3	4	2	2.2	8.6	6.7
Q9BRF8	Serine/threonine-protein phosphatase CPPED1	CPPED1	17.2466	23.3494	20.298	20.6749	22.521	21.5979	17.7899	19.1414	18.4656	-1.29996	-3.13229	1.83233	0.406137	0.114047	3.56113		3	3	3	9.6	9.6	9.6	35.548	59.743	18746000	13	1	3	2	2	1	0	1	3	2	2	1	0	1	3	2	2	1	0	3.5	9.6	6.7
Q58FF8	Putative heat shock protein HSP 90-beta 2	HSP90AB2P	20.0588	17.3946	18.7267	17.9813	19.1029	18.5421	24.543	24.6614	24.6022	0.18455	6.06004	-5.87549	1.13646	66.7197	0.0170334		15	2	2	24.7	4.5	4.5	44.348	102.27	50433000	36	12	13	12	14	13	13	1	1	0	1	2	2	1	1	0	1	2	2	21.3	23.4	18.1
Q09666	Neuroblast differentiation-associated protein AHNAK	AHNAK	19.5929	18.9262	19.2595	19.899	19.6662	19.7826	23.1825	23.116	23.1493	-0.523045	3.36668	-3.88973	0.695901	10.3151	0.0674646		40	40	40	21	21	21	629.09	82.589	19054000	103	2	0	4	3	31	26	2	0	4	3	31	26	2	0	4	3	31	26	0.5	0	2.7
P49458	Signal recognition particle 9 kDa protein	SRP9	19.7443	16.1816	17.9629	18.6024	18.8116	18.707	22.741	22.6039	22.6725	-0.744035	3.9655	-4.70954	0.597067	15.6219	0.0382198		4	4	4	44.2	44.2	44.2	10.112	18.871	2174700	11	2	1	1	1	4	2	2	1	1	1	4	2	2	1	1	1	4	2	25.6	12.8	12.8
P17612	cAMP-dependent protein kinase catalytic subunit alpha	PRKACA	18.8597	18.3884	18.6241	18.2738	22.1208	20.1973	23.8191	23.5843	23.7017	-1.57326	3.50437	-5.07763	0.336048	11.348	0.0296129		14	14	5	29.1	29.1	12.3	40.589	59.194	21721000	36	1	1	1	5	12	10	1	1	1	5	12	10	1	1	0	2	4	4	3.4	3.4	2.6
O75340	Programmed cell death protein 6	PDCD6	20.992	18.1788	19.5854	17.3618	18.9963	18.1791	23.3988	23.1341	23.2665	1.40637	5.08744	-3.68107	2.65069	33.9996	0.0779625		5	5	5	30.9	30.9	30.9	21.868	39.657	13361000	19	2	1	0	1	5	3	2	1	0	1	5	3	2	1	0	1	5	3	9.9	4.7	0
P05387	60S acidic ribosomal protein P2	RPLP2	20.801	18.718	19.7595	17.9897	20.2289	19.1093	25.6521	24.1031	24.8776	0.650155	5.7683	-5.11814	1.56934	54.5042	0.028793		8	8	8	74.8	74.8	74.8	11.665	53.57	19270000	30	2	0	0	2	8	4	2	0	0	2	8	4	2	0	0	2	8	4	21.7	0	0
Q92890	Ubiquitin fusion degradation protein 1 homolog	UFD1L	20.8171	18.8527	19.8349	17.8596	21.1559	19.5078	21.2414	21.6504	21.4459	0.327075	1.93814	-1.61106	1.25447	3.8321	0.327358		6	6	6	26.7	26.7	26.7	34.5	22.693	6848500	28	3	1	1	2	5	6	3	1	1	2	5	6	3	1	1	2	5	6	11.7	2.6	4.9
Q92522	Histone H1x	H1FX	18.9624	17.0314	17.9969	17.7373	21.853	19.7952	21.1264	20.7401	20.9332	-1.79828	1.13809	-2.93636	0.287518	2.20089	0.130637		5	5	5	18.3	18.3	18.3	22.487	8.9673	3799100	24	1	1	1	2	4	3	1	1	1	2	4	3	1	1	1	2	4	3	5.6	5.6	5.6
Q13242	Serine/arginine-rich splicing factor 9	SRSF9	19.6528	18.3056	18.9792	18.6818	20.7987	19.7403	21.3976	21.1853	21.2914	-0.76105	1.55117	-2.31222	0.590067	2.93055	0.20135		5	5	5	23.5	23.5	23.5	25.542	32.14	4056800	18	1	0	1	3	3	4	1	0	1	3	3	4	1	0	1	3	3	4	5.4	0	5.4
P50583	Bis(5-nucleosyl)-tetraphosphatase [asymmetrical]	NUDT2	19.3249	18.6352	18.98	17.3881	21.3576	19.3728	21.085	20.7424	20.9137	-0.39281	1.54085	-1.93366	0.761645	2.90965	0.261765		9	9	9	72.1	72.1	72.1	16.829	26.489	3760700	19	1	2	0	2	5	6	1	2	0	2	5	6	1	2	0	2	5	6	5.4	9.5	0
P13073	Cytochrome c oxidase subunit 4 isoform 1, mitochondrial	COX4I1	19.9171	18.6883	19.3027	17.6806	23.1667	20.4237	22.1395	22.1765	22.158	-1.12099	1.73429	-2.85528	0.45978	3.32717	0.13819		7	7	7	42	42	42	19.576	12.876	7115400	25	1	1	1	3	5	3	1	1	1	3	5	3	1	1	1	3	5	3	7.1	4.7	7.1
O15498	Synaptobrevin homolog YKT6	YKT6	19.7316	18.7769	19.2542	17.5665	21.2756	19.4211	22.3752	20.8612	21.6182	-0.166825	2.19713	-2.36396	0.890801	4.58566	0.194258		6	6	6	33.8	33.8	33.8	22.417	26.421	10057000	18	3	1	1	4	6	3	3	1	1	4	6	3	3	1	1	4	6	3	17.2	4.5	4
O43583	Density-regulated protein	DENR	20.0401	18.6244	19.3322	18.6826	20.7302	19.7064	21.4831	21.6945	21.5888	-0.374215	1.88232	-2.25654	0.771525	3.68669	0.209273		6	6	6	30.8	30.8	30.8	22.092	155.93	4449200	24	3	1	1	2	5	5	3	1	1	2	5	5	3	1	1	2	5	5	22.7	6.1	9.1
Q9Y281	Cofilin-2	CFL2	22.2561	18.8138	20.5349	18.712	22.757	20.7345	22.3155	21.4316	21.8735	-0.199605	1.139	-1.3386	0.870789	2.20228	0.395404		10	5	5	63.9	38.6	38.6	18.736	69.72	12543000	18	5	3	2	3	7	8	3	1	0	2	3	4	3	1	0	2	3	4	34.9	18.1	13.3
Q9BV40	Vesicle-associated membrane protein 8	VAMP8	21.4686	18.024	19.7463	19.1352	21.9445	20.5399	22.8718	22.4397	22.6557	-0.79361	2.11586	-2.90947	0.576899	4.33447	0.133096		4	4	4	33	33	33	11.438	8.9108	5334800	17	4	0	0	2	2	2	4	0	0	2	2	2	4	0	0	2	2	2	33	0	0
P62847	40S ribosomal protein S24	RPS24	22.6641	17.8524	20.2583	20.0057	22.6233	21.3145	23.4561	22.9707	23.2134	-1.05623	1.89892	-2.95515	0.480887	3.72933	0.128947		4	4	4	29.3	29.3	29.3	15.423	15.708	13579000	40	2	0	1	2	4	4	2	0	1	2	4	4	2	0	1	2	4	4	19.5	0	8.3
P52298	Nuclear cap-binding protein subunit 2	NCBP2	21.8701	19.3561	20.6131	19.7202	21.4857	20.6029	21.7188	21.4869	21.6029	0.01018	0.99993	-0.98975	1.00708	1.9999	0.503565		4	4	4	31.4	31.4	31.4	18.001	9.9114	4324000	18	2	1	0	2	4	2	2	1	0	2	4	2	2	1	0	2	4	2	12.2	7.1	0
P09132;D6RBG4	Signal recognition particle 19 kDa protein	SRP19	22.2894	18.8232	20.5563	17.9714	22.0328	20.0021	22.219	21.9539	22.0865	0.55422	2.08438	-1.53016	1.46837	4.24093	0.346239		9	9	9	59	59	59	16.156	130.12	12803000	49	5	1	1	4	6	4	5	1	1	4	6	4	5	1	1	4	6	4	37.5	10.4	10.4
P36404;V9GYD0	ADP-ribosylation factor-like protein 2	ARL2	22.6356	19.0128	20.8242	19.5415	21.8985	20.72	21.7418	21.6474	21.6946	0.10419	0.974585	-0.870395	1.07489	1.96508	0.546997		7	7	7	40.2	40.2	40.2	20.878	49.272	8744200	28	3	1	1	3	7	5	3	1	1	3	7	5	3	1	1	3	7	5	18.5	5.4	5.4
Q9Y3D3	28S ribosomal protein S16, mitochondrial	MRPS16	21.4691	19.1098	20.2894	18.2179	22.2656	20.2417	20.7117	21.377	21.0443	0.047695	0.80263	-0.754935	1.03361	1.74428	0.592573		4	4	4	38	38	38	15.345	13.191	3575000	20	2	1	1	2	4	4	2	1	1	2	4	4	2	1	1	2	4	4	15.3	9.5	9.5
Q9NQG5	Regulation of nuclear pre-mRNA domain-containing protein 1B	RPRD1B	21.0401	18.7232	19.8816	19.5782	20.4123	19.9952	21.4528	21.3493	21.401	-0.11359	1.40583	-1.51943	0.924285	2.64971	0.348825		11	11	7	42.9	42.9	31	36.899	59.232	5502200	35	2	0	3	3	10	6	2	0	3	3	10	6	2	0	3	3	6	5	6.1	0	11
Q9BW83	Intraflagellar transport protein 27 homolog	IFT27	21.9608	19.0619	20.5113	18.2492	20.9928	19.621	20.5789	20.8103	20.6946	0.890335	1.07364	-0.183305	1.85361	2.10474	0.880683		8	8	8	54.3	54.3	54.3	20.48	34.939	6331500	33	4	1	1	2	7	3	4	1	1	2	7	3	4	1	1	2	7	3	23.7	5.9	5.9
Q8WUY1	Protein THEM6	THEM6	21.0861	18.2319	19.659	18.771	22.1145	20.4428	21.1307	20.4466	20.7887	-0.783735	0.34591	-1.12965	0.580861	1.27095	0.457028		6	6	6	23.1	23.1	23.1	23.865	13.698	6032900	21	4	2	1	3	4	3	4	2	1	3	4	3	4	2	1	3	4	3	16.3	9.6	5.8
Q4VC31	Coiled-coil domain-containing protein 58	CCDC58	21.5892	18.3835	19.9863	18.734	21.8331	20.2836	21.0261	21.4783	21.2522	-0.297235	0.96864	-1.26588	0.813811	1.95699	0.415847		3	3	3	25.7	25.7	25.7	16.62	14.104	5155400	23	2	1	1	3	3	2	2	1	1	3	3	2	2	1	1	3	3	2	13.9	7.6	7.6
O14979	Heterogeneous nuclear ribonucleoprotein D-like	HNRNPDL	22.4952	19.4489	20.9721	18.4519	22.3574	20.4046	21.3144	20.87	21.0922	0.56742	0.687585	-0.120165	1.48187	1.61059	0.920082		7	6	6	14.5	12.6	12.6	46.437	17.928	27449000	36	4	2	2	6	3	4	3	1	1	5	2	3	3	1	1	5	2	3	10.7	3.8	3.8
O43447	Peptidyl-prolyl cis-trans isomerase H	PPIH	21.3604	17.6611	19.5108	19.3138	21.8295	20.5717	21.045	21.3287	21.1869	-1.0609	0.61518	-1.67609	0.479331	1.53175	0.312931		8	8	8	35.6	35.6	35.6	19.208	14.232	8160800	29	4	1	1	2	7	3	4	1	1	2	7	3	4	1	1	2	7	3	24.3	6.2	6.2
Q96AG4	Leucine-rich repeat-containing protein 59	LRRC59	21.5569	18.5411	20.049	21.4274	21.6093	21.5183	17.529	18.0664	17.7977	-1.46933	-3.72065	2.25132	0.36115	0.075853	4.76118		10	10	10	47.6	47.6	47.6	34.93	19.932	17014000	36	2	1	4	4	6	5	2	1	4	4	6	5	2	1	4	4	6	5	7.2	3.3	13.4
Q6YN16	Hydroxysteroid dehydrogenase-like protein 2	HSDL2	20.9873	18.9457	19.9665	22.3869	21.4922	21.9396	17.4674	17.8573	17.6624	-1.97305	-4.27719	2.30414	0.254714	0.0515746	4.93875		8	8	8	25.4	25.4	25.4	45.394	36.46	17547000	21	2	0	4	4	3	2	2	0	4	4	3	2	2	0	4	4	3	2	5.5	0	9.8
Q16563	Synaptophysin-like protein 1	SYPL1	21.703	16.8215	19.2622	21.5204	21.402	21.4612	19.0724	18.0975	18.5849	-2.19894	-2.87624	0.6773	0.217797	0.136196	1.59914		3	3	3	19.7	19.7	19.7	28.565	9.4018	21355000	47	2	1	2	2	1	2	2	1	2	2	1	2	2	1	2	2	1	2	13.9	4.2	13.9
Q15067	Peroxisomal acyl-coenzyme A oxidase 1	ACOX1	22.1275	18.212	20.1698	22.9831	21.7955	22.3893	17.2872	18.975	18.1311	-2.21955	-4.25823	2.03868	0.214708	0.0522571	4.10868		13	13	13	28	28	28	74.423	76.836	29234000	31	7	1	9	4	3	3	7	1	9	4	3	3	7	1	9	4	3	3	14.7	1.8	20.2
P60468	Protein transport protein Sec61 subunit beta	SEC61B	21.9697	18.7799	20.3748	22.5707	21.7029	22.1368	18.9071	18.5118	18.7095	-1.76197	-3.4273	1.66533	0.294846	0.0929565	3.17187		3	3	3	37.5	37.5	37.5	9.9743	5.9878	5586500	26	2	1	2	2	2	2	2	1	2	2	2	2	2	1	2	2	2	2	21.9	10.4	21.9
P61619;Q9H9S3	Protein transport protein Sec61 subunit alpha isoform 1	SEC61A1	21.4093	18.9625	20.1859	21.9967	21.7015	21.8491	19.1798	18.7884	18.9841	-1.6632	-2.86496	1.20176	0.315738	0.137265	2.3002		3	3	3	6.1	6.1	6.1	52.264	3.585	12639000	8	2	1	2	3	0	0	2	1	2	3	0	0	2	1	2	3	0	0	4.2	2.3	4.2
Q13885;Q9BVA1	Tubulin beta-2A chain;Tubulin beta-2B chain	TUBB2A;TUBB2B	21.3574	20.5235	20.9405	21.2469	21.0658	21.1563	19.3096	22.1561	20.7329	-0.21588	-0.423475	0.207595	0.861021	0.745626	1.15476		25	5	4	62.7	16.9	14.2	49.906	24.898	17013000	39	22	14	18	21	20	22	4	2	3	3	3	4	3	2	2	2	3	4	56.6	32.1	44.5
Q13310;P0CB38	Polyadenylate-binding protein 4	PABPC4	21.6374	19.3222	20.4798	21.5674	21.0933	21.3303	19.6815	21.4898	20.5857	-0.85052	-0.744675	-0.105845	0.554585	0.596802	0.929261		20	9	8	32	15.5	14.1	70.782	14.236	26628000	23	12	7	8	11	13	11	4	2	2	4	4	3	4	2	2	3	4	3	19.7	11.5	13.2
P61201	COP9 signalosome complex subunit 2	COPS2	22.585	18.4525	20.5188	20.6647	20.7273	20.696	20.1226	22.0996	21.1111	-0.177195	0.41513	-0.592325	0.884421	1.33342	0.663273		8	8	8	23.7	23.7	23.7	51.596	44.341	26661000	46	7	1	2	5	1	5	7	1	2	5	1	5	7	1	2	5	1	5	19	2.9	5.2
P50995;P27216	Annexin A11	ANXA11	21.5154	20.0684	20.7919	21.8155	21.1724	21.494	19.1999	24.0084	21.6041	-0.702055	0.110165	-0.81222	0.614696	1.07935	0.569505		11	11	11	24.8	24.8	24.8	54.389	54.357	24905000	50	6	2	5	3	2	11	6	2	5	3	2	11	6	2	5	3	2	11	13.9	4.2	12.1
P54725	UV excision repair protein RAD23 homolog A	RAD23A	21.7364	18.7863	20.2613	21.197	21.0511	21.1241	18.8656	20.6141	19.7399	-0.86275	-1.38417	0.52142	0.549903	0.38311	1.43537		6	4	4	22.9	18.2	18.2	39.609	31.08	18492000	19	4	2	4	3	1	3	3	1	2	2	0	3	3	1	2	2	0	3	15.7	10.5	15.4
P09497	Clathrin light chain B	CLTB	22.7064	17.6956	20.201	22.22	19.5491	20.8846	18.2196	21.1714	19.6955	-0.68356	-1.1891	0.505545	0.622627	0.438575	1.41966		7	7	7	24	24	24	25.19	8.6437	19996000	31	3	1	5	4	2	2	3	1	5	4	2	2	3	1	5	4	2	2	10.9	3.5	19.2
Q9BUF5	Tubulin beta-6 chain	TUBB6	20.9078	18.3423	19.6251	21.6782	20.9397	21.309	18.4757	21.874	20.1748	-1.68391	-1.13411	-0.549795	0.311238	0.455614	0.683117		20	8	8	61	34.5	34.5	49.857	129.4	12342000	37	13	10	12	13	8	17	3	1	3	3	1	6	3	1	3	3	1	6	31.8	22.4	29.8
Q9NZJ9;Q96G61;Q8NFP7	Diphosphoinositol polyphosphate phosphohydrolase 2	NUDT4	22.0341	17.8601	19.9471	22.0482	22.0992	22.0737	20.9001	21.0539	20.977	-2.12655	-1.09669	-1.02985	0.229006	0.467588	0.489759		4	4	4	31.7	31.7	31.7	20.306	28.453	9543900	26	3	1	2	2	3	2	3	1	2	2	3	2	3	1	2	2	3	2	18.3	5	12.8
Q9BRJ6	Uncharacterized protein C7orf50	C7orf50	21.7168	19.6886	20.7027	22.416	22.4453	22.4307	21.5828	21.0558	21.3193	-1.72798	-1.11137	-0.61661	0.301873	0.462853	0.652202		5	5	5	36.1	36.1	36.1	22.083	24.867	10564000	52	4	1	4	4	5	4	4	1	4	4	5	4	4	1	4	4	5	4	35.6	7.2	35.6
Q53H96	Pyrroline-5-carboxylate reductase 3	PYCRL	22.2813	18.0876	20.1845	22.4656	22.1438	22.3047	20.8755	20.6615	20.7685	-2.12024	-1.53617	-0.58407	0.230009	0.3448	0.667079		5	5	5	19	19	19	28.663	43.908	21792000	32	3	2	3	3	3	3	3	2	3	3	3	3	3	2	3	3	3	3	12.8	8.8	13.9
P62873;P16520	Guanine nucleotide-binding protein G(I)/G(S)/G(T) subunit beta-1	GNB1	21.2952	18.2807	19.788	21.7836	22.3394	22.0615	21.5828	21.957	21.7699	-2.27351	-0.291585	-1.98193	0.206826	0.817004	0.253152		10	5	5	32.9	18.5	18.5	37.377	68.847	25068000	29	6	3	5	5	4	5	2	1	2	3	3	3	2	1	2	3	3	3	20.6	9.7	18.2
P18754	Regulator of chromosome condensation	RCC1	20.3422	18.9067	19.6245	23.194	22.8019	22.9979	21.341	22.3168	21.8289	-3.37344	-1.16902	-2.20442	0.0964925	0.444723	0.216972	+	10	10	10	31.4	31.4	31.4	44.969	113.27	36293000	33	2	0	5	7	2	6	2	0	5	7	2	6	2	0	5	7	2	6	8.6	0	18.5
P19388	DNA-directed RNA polymerases I, II, and III subunit RPABC1	POLR2E	21.1485	18.4011	19.7748	21.8595	22.2718	22.0657	21.0538	20.572	20.8129	-2.29089	-1.25277	-1.03812	0.204349	0.419642	0.486962		5	5	5	27.1	27.1	27.1	24.551	59.19	9744600	19	2	1	3	3	3	2	2	1	3	3	3	2	2	1	3	3	3	2	8.1	4.3	15.2
Q9BTZ2;Q6PKH6;P0CG22	Dehydrogenase/reductase SDR family member 4	DHRS4	21.6031	19.3529	20.478	22.5551	18.5979	20.5765	21.4573	18.6718	20.0646	-0.09854	-0.51194	0.4134	0.933978	0.701279	1.33182		7	7	7	37.8	37.8	37.8	29.537	61.071	20110000	37	3	1	3	1	6	1	3	1	3	1	6	1	3	1	3	1	6	1	11.5	3.2	11.5
Q86SZ2	Trafficking protein particle complex subunit 6B	TRAPPC6B	22.1482	18.9705	20.5593	21.7824	18.5323	20.1573	20.7007	17.6018	19.1513	0.40201	-1.00608	1.40809	1.32135	0.497897	2.65386		8	8	8	46.2	46.2	46.2	17.983	16.161	4672600	24	4	1	2	1	6	1	4	1	2	1	6	1	4	1	2	1	6	1	25.3	5.1	10.8
Q15323	Keratin, type I cuticular Ha1	KRT31	21.3451	18.7171	20.0311	21.6729	18.1529	19.9129	22.4689	18.765	20.617	0.118235	0.704085	-0.58585	1.08541	1.62911	0.666257		15	13	1	33.4	30	2.6	47.237	95.612	12910000	29	8	2	7	5	9	1	6	0	5	3	7	0	1	0	1	0	0	0	18.5	3.4	15.4
P24539	ATP synthase F(0) complex subunit B1, mitochondrial	ATP5F1	21.7821	19.1047	20.4434	22.1077	19.7036	20.9057	21.4129	19.0056	20.2093	-0.462305	-0.69639	0.234085	0.725826	0.617114	1.17616		3	3	3	9.8	9.8	9.8	28.908	18.342	9403600	14	3	1	2	1	2	1	3	1	2	1	2	1	3	1	2	1	2	1	9.8	3.1	7.8
P68871;P02042;P69892;P69891;P02100	Hemoglobin subunit beta;LVV-hemorphin-7;Spinorphin	HBB	21.5747	18.8432	20.209	23.2173	19.0675	21.1424	22.4897	19.3586	20.9241	-0.93344	-0.218285	-0.715155	0.523608	0.859587	0.60914		5	5	5	40.1	40.1	40.1	15.998	31.626	13996000	35	2	1	5	1	2	1	2	1	5	1	2	1	2	1	5	1	2	1	15.6	6.8	40.1
Q9BPW8	Protein NipSnap homolog 1	NIPSNAP1	21.3503	18.4169	19.8836	22.5011	18.9872	20.7441	20.7593	21.2431	21.0012	-0.86052	0.25707	-1.11759	0.550754	1.19505	0.460863		10	10	9	40.8	40.8	38	33.31	31.987	16458000	32	3	2	4	2	5	5	3	2	4	2	5	5	3	1	4	2	5	5	11.3	5.6	16.5
Q92817;A8MZ36	Envoplakin	EVPL	25.111	18.2445	21.6777	23.3566	18.4681	20.9124	22.7805	22.1343	22.4574	0.76534	1.54506	-0.779725	1.69977	2.91817	0.582478		23	23	23	15.4	15.4	15.4	231.6	83.003	198210000	38	9	1	4	1	13	10	9	1	4	1	13	10	9	1	4	1	13	10	5.2	0.3	2.4
Q4V328	GRIP1-associated protein 1	GRIPAP1	22.6848	19.6855	21.1851	21.2489	19.6353	20.4421	21.0755	20.6648	20.8701	0.743035	0.42802	0.315015	1.67369	1.34539	1.24402		21	21	21	34	34	34	95.988	148.09	18272000	46	13	2	6	0	11	7	13	2	6	0	11	7	13	2	6	0	11	7	19	2.7	8.4
O14908	PDZ domain-containing protein GIPC1	GIPC1	22.4193	18.9244	20.6718	21.6366	17.7026	19.6696	22.2054	21.9975	22.1014	1.00225	2.43187	-1.42962	2.00312	5.39591	0.37123		7	7	7	24.6	24.6	24.6	36.049	66.879	14729000	24	2	1	2	1	6	6	2	1	2	1	6	6	2	1	2	1	6	6	6.6	4.2	8.7
O75832	26S proteasome non-ATPase regulatory subunit 10	PSMD10	23.0476	19.0337	21.0406	21.9041	20.4519	21.178	21.2985	21.2799	21.2892	-0.1374	0.11123	-0.24863	0.909156	1.08015	0.841695		6	6	6	36.7	36.7	36.7	24.428	32.636	12883000	37	4	0	4	2	6	5	4	0	4	2	6	5	4	0	4	2	6	5	30.5	0	30.5
Q9Y333	U6 snRNA-associated Sm-like protein LSm2	LSM2	19.9031	21.1131	20.5081	19.6622	19.2049	19.4336	22.4383	22.8024	22.6203	1.07452	3.18675	-2.11223	2.10602	9.10557	0.231289		5	5	5	72.6	72.6	72.6	10.834	12.976	3465800	19	1	2	1	1	4	2	1	2	1	1	4	2	1	2	1	1	4	2	11.6	31.6	11.6
P09601	Heme oxygenase 1	HMOX1	20.9177	21.2934	21.1056	19.2232	18.3217	18.7724	23.0311	23.4885	23.2598	2.33314	4.48739	-2.15425	5.03901	22.4305	0.22465	+	12	12	12	46.9	46.9	46.9	32.818	50.699	9221200	46	3	3	0	0	10	10	3	3	0	0	10	10	3	3	0	0	10	10	12.8	11.8	0
P53680	AP-2 complex subunit sigma	AP2S1	19.3861	21.2962	20.3411	19.2351	17.6142	18.4247	22.8595	21.8783	22.3689	1.91646	3.94422	-2.02776	3.77496	15.3932	0.245235		4	4	4	25.4	25.4	25.4	17.018	9.1952	3805800	12	0	2	1	0	4	2	0	2	1	0	4	2	0	2	1	0	4	2	0	11.3	4.9
Q9Y3E7;A0A140T963	Charged multivesicular body protein 3	CHMP3	21.1675	22.2018	21.6846	19.2429	17.9978	18.6204	21.2405	20.9865	21.1135	3.06425	2.49313	0.571125	8.36436	5.62998	1.48568		4	4	4	16.7	16.7	16.7	25.073	8.171	12559000	14	3	2	1	1	2	3	3	2	1	1	2	3	3	2	1	1	2	3	11.3	7.2	3.2
Q5T6V5	UPF0553 protein C9orf64	C9orf64	20.8444	21.4751	21.1597	19.1046	18.0683	18.5864	21.4333	21.6125	21.5229	2.5733	2.93647	-0.363165	5.95171	7.65536	0.777457		14	14	14	42.5	42.5	42.5	39.028	62.509	14784000	38	5	4	3	4	8	5	5	4	3	4	8	5	5	4	3	4	8	5	15.5	11.7	8.2
O15551	Claudin-3	CLDN3	20.5058	21.2938	20.8998	18.5009	18.9146	18.7078	21.645	21.5751	21.61	2.19208	2.90228	-0.7102	4.56962	7.47604	0.611235	+	5	5	4	20	20	12.7	23.318	9.323	7563700	32	4	2	1	1	4	2	4	2	1	1	4	2	3	1	1	1	3	1	19.5	12.7	5.5
P48200	Iron-responsive element-binding protein 2	IREB2	20.4831	20.9797	20.7314	17.8006	17.89	17.8453	20.682	20.5338	20.6079	2.88607	2.76259	0.12348	7.39256	6.78616	1.08936	+	15	15	15	21.9	21.9	21.9	105.04	69.637	10173000	32	6	4	0	0	12	6	6	4	0	0	12	6	6	4	0	0	12	6	6.6	4.4	0
Q9H910	Hematological and neurological expressed 1-like protein	HN1L	18.9675	19.2911	19.1293	18.1634	19.8163	18.9898	21.4862	21.4469	21.4665	0.13946	2.47667	-2.33721	1.10149	5.56611	0.197893		2	2	2	14.7	14.7	14.7	20.063	12.654	2084600	16	0	0	0	2	2	2	0	0	0	2	2	2	0	0	0	2	2	2	0	0	0
Q9GZT8	NIF3-like protein 1	NIF3L1	18.0202	19.1691	18.5946	18.405	19.6499	19.0274	21.6068	21.5595	21.5831	-0.432795	2.55569	-2.98849	0.740825	5.87949	0.126002		10	10	10	33.7	33.7	33.7	41.968	25.94	10624000	25	1	3	2	3	6	6	1	3	2	3	6	6	1	3	2	3	6	6	3.4	11.1	5
O60925	Prefoldin subunit 1	PFDN1	17.2827	19.3788	18.3307	17.576	21.0674	19.3217	21.0096	20.9596	20.9846	-0.99098	1.66294	-2.65392	0.503136	3.16661	0.158888		4	4	4	29.5	29.5	29.5	14.21	6.4293	2884900	13	2	1	0	2	2	3	2	1	0	2	2	3	2	1	0	2	2	3	14.8	9	0
Q96GQ7	Probable ATP-dependent RNA helicase DDX27	DDX27	18.1542	19.8428	18.9985	18.3785	18.0654	18.2219	21.9073	20.6835	21.2954	0.77656	3.07349	-2.29693	1.71304	8.41807	0.203496		14	14	14	18.2	18.2	18.2	89.834	44.491	6246600	26	2	0	2	2	9	9	2	0	2	2	9	9	2	0	2	2	9	9	3	0	3
Q9Y547	Intraflagellar transport protein 25 homolog	HSPB11	17.0287	21.1643	19.0965	17.8553	19.2521	18.5537	20.9572	21.0438	21.0005	0.54284	2.4468	-1.90396	1.45684	5.45205	0.267209		4	4	4	36.1	36.1	36.1	16.297	13.45	3883400	11	1	2	1	0	3	3	1	2	1	0	3	3	1	2	1	0	3	3	7.6	10.4	7.6
P49585;Q9Y5K3	Choline-phosphate cytidylyltransferase A	PCYT1A	18.4627	22.0075	20.2351	18.737	18.5329	18.6349	21.8944	21.7475	21.821	1.60016	3.18603	-1.58587	3.03177	9.10103	0.333124		11	11	11	42.8	42.8	42.8	41.731	20.183	11192000	23	2	2	2	1	7	6	2	2	2	1	7	6	2	2	2	1	7	6	6.3	5.2	7.9
Q6PKG0;Q659C4	La-related protein 1	LARP1	17.4294	21.944	19.6867	17.1064	19.0387	18.0725	20.5939	21.1882	20.891	1.61413	2.81851	-1.20438	3.06127	7.05433	0.433956		11	11	11	12.8	12.8	12.8	123.51	15.632	4614600	32	1	2	0	2	10	4	1	2	0	2	10	4	1	2	0	2	10	4	1.1	1.4	0
Q9NRX4	14 kDa phosphohistidine phosphatase	PHPT1	17.8928	21.5625	19.7276	18.8818	21.1821	20.0319	21.5313	21.8159	21.6736	-0.30429	1.64164	-1.94593	0.809841	3.1202	0.259547		5	5	5	48.8	48.8	48.8	13.832	32.522	4288800	32	1	2	2	3	3	3	1	2	2	3	3	3	1	2	2	3	3	3	9.6	20	20
P62857	40S ribosomal protein S28	RPS28	17.8881	20.7324	19.3103	18.2747	21.5703	19.9225	23.0914	23.1925	23.1419	-0.612215	3.21945	-3.83167	0.654192	9.31432	0.0702351		3	3	3	36.2	36.2	36.2	7.8409	24.355	9065600	23	1	2	1	2	3	3	1	2	1	2	3	3	1	2	1	2	3	3	17.4	30.4	13
P01111	GTPase NRas	NRAS	19.8302	21.8164	20.8233	18.0519	22.0989	20.0754	19.6582	22.6345	21.1464	0.74788	1.07095	-0.323065	1.67932	2.10081	0.79937		9	9	2	52.9	52.9	12.7	21.229	51.049	7421200	25	2	2	1	5	3	3	2	2	1	5	3	3	0	1	0	1	1	1	14.3	10.6	5.8
P35580	Myosin-10	MYH10	20.5273	21.3951	20.9612	18.257	22.1887	20.2229	21.7188	22.6254	22.1721	0.7383	1.94918	-1.21088	1.66821	3.86155	0.432005		57	38	37	34	25.2	24.6	229	323.31	26190000	92	22	23	9	20	31	44	10	12	2	10	17	29	9	11	2	9	16	28	13.3	14.1	5.2
Q00577	Transcriptional activator protein Pur-alpha	PURA	17.8297	21.8216	19.8257	21.804	19.8635	20.8338	21.063	22.1851	21.624	-1.00812	0.790265	-1.79839	0.497194	1.72939	0.287496		8	8	8	35.4	35.4	35.4	34.91	37.029	19572000	30	1	4	3	4	5	4	1	4	3	4	5	4	1	4	3	4	5	4	2.8	16.1	8.1
Q9BX68	Histidine triad nucleotide-binding protein 2, mitochondrial	HINT2	18.2169	21.7898	20.0034	22.3089	18.8672	20.5881	20.963	21.8303	21.3967	-0.584685	0.80862	-1.39331	0.666795	1.75154	0.380692		4	4	4	38	38	38	17.162	20.468	4615900	23	1	2	2	1	4	2	1	2	2	1	4	2	1	2	2	1	4	2	9.8	15.3	15.3
Q9UBQ5	Eukaryotic translation initiation factor 3 subunit K	EIF3K	17.5996	18.1932	17.8964	22.7516	18.3643	20.5579	22.6498	22.7316	22.6907	-2.66158	2.13273	-4.79431	0.158046	4.38545	0.0360388		7	7	7	39.9	39.9	39.9	25.059	29.658	9715100	20	1	1	3	1	5	6	1	1	3	1	5	6	1	1	3	1	5	6	5	5	17.9
Q9NWV4	UPF0587 protein C1orf123	C1orf123	17.5258	18.2214	17.8736	20.5555	18.7508	19.6532	21.3783	21.6568	21.5175	-1.77952	1.86437	-3.64389	0.291279	3.64108	0.0799981		6	6	6	43.8	43.8	43.8	18.048	14.094	8462700	20	2	2	2	3	2	3	2	2	2	3	2	3	2	2	2	3	2	3	14.4	11.2	19.4
Q9BRX8	Redox-regulatory protein FAM213A	FAM213A	18.1593	17.9855	18.0724	20.484	18.9147	19.6994	21.4416	20.5879	21.0148	-1.62695	1.31539	-2.94234	0.323772	2.4887	0.130097		10	10	10	38	38	38	25.764	26.287	6526200	18	0	2	3	3	6	2	0	2	3	3	6	2	0	2	3	3	6	2	0	6.6	16.2
Q8NCW5	NAD(P)H-hydrate epimerase	APOA1BP	19.0757	18.5417	18.8087	21.7183	18.1226	19.9205	23.3152	23.0972	23.2062	-1.11175	3.28572	-4.39748	0.462731	9.75218	0.047449		8	8	8	40.3	40.3	40.3	31.674	73.142	15955000	39	0	1	6	2	8	5	0	1	6	2	8	5	0	1	6	2	8	5	0	4.2	30.9
Q15404	Ras suppressor protein 1	RSU1	18.0431	18.5535	18.2983	20.2779	17.6738	18.9758	21.5337	21.7639	21.6488	-0.67758	2.67293	-3.35051	0.625213	6.37723	0.0980383		7	7	7	29.6	29.6	29.6	31.54	13.124	12193000	19	1	1	5	2	3	4	1	1	5	2	3	4	1	1	5	2	3	4	3.6	3.2	23.5
O00743	Serine/threonine-protein phosphatase 6 catalytic subunit;Serine/threonine-protein phosphatase 6 catalytic subunit, N-terminally processed	PPP6C	18.0761	16.8568	17.4664	21.6631	18.9755	20.3193	21.5394	22.167	21.8532	-2.85286	1.53392	-4.38678	0.138421	2.89572	0.047802		8	8	8	35.1	35.1	35.1	35.144	59.071	6646600	31	1	3	3	2	5	5	1	3	3	2	5	5	1	3	3	2	5	5	4.9	11.8	11.8
Q13464	Rho-associated protein kinase 1	ROCK1	17.9365	18.1321	18.0343	19.7478	18.8694	19.3086	20.7263	21.5707	21.1485	-1.27428	1.83993	-3.11421	0.41343	3.57991	0.115486		26	21	21	23	18.8	18.8	158.17	44.641	4999800	31	1	3	5	3	12	15	1	2	5	2	10	11	1	2	5	2	10	11	0.8	2.4	4.3
Q92538	Golgi-specific brefeldin A-resistance guanine nucleotide exchange factor 1	GBF1	19.8606	18.6288	19.2447	20.3533	19.6269	19.9901	22.0433	21.2732	21.6582	-0.74536	1.66818	-2.41354	0.596519	3.17813	0.187695		27	27	27	19.2	19.2	19.2	206.44	98.388	8907200	54	5	0	7	2	21	14	5	0	7	2	21	14	5	0	7	2	21	14	3.4	0	5
Q12768	WASH complex subunit strumpellin	KIAA0196	19.4344	19.3366	19.3855	19.1276	18.9193	19.0234	21.7692	21.5713	21.6702	0.36205	2.64682	-2.28477	1.28525	6.26283	0.205219		19	19	19	21.7	21.7	21.7	134.28	97.061	8613100	48	4	4	1	4	15	14	4	4	1	4	15	14	4	4	1	4	15	14	4.2	4.5	0.9
O14776;Q5VWI1	Transcription elongation regulator 1	TCERG1	18.5796	20.0686	19.3241	19.5325	18.5287	19.0306	21.7152	20.7947	21.2549	0.29348	2.22432	-1.93084	1.22559	4.67291	0.262276		14	14	14	12.1	12.1	12.1	123.9	54.031	5418600	26	2	0	2	1	8	9	2	0	2	1	8	9	2	0	2	1	8	9	2.1	0	2.3
P42285	Superkiller viralicidic activity 2-like 2	SKIV2L2	19.3136	19.5006	19.4071	19.7889	19.5035	19.6462	21.3307	20.8023	21.0665	-0.23906	1.42034	-1.6594	0.847297	2.67649	0.316571		12	12	12	16.2	16.2	16.2	117.8	46.46	6790800	29	2	1	3	4	9	6	2	1	3	4	9	6	2	1	3	4	9	6	2.3	1	3.5
Q9NP79	Vacuolar protein sorting-associated protein VTA1 homolog	VTA1	18.4961	20.0608	19.2784	19.6146	20.4917	20.0531	21.9254	22.0307	21.9781	-0.774705	1.92492	-2.69963	0.584508	3.79717	0.153933		6	6	6	26.1	26.1	26.1	33.879	79.232	12613000	31	1	2	3	2	3	3	1	2	3	2	3	3	1	2	3	2	3	3	3.3	9.8	12.7
Q99614	Tetratricopeptide repeat protein 1	TTC1	17.8594	20.4811	19.1703	20.6125	19.3143	19.9634	21.176	20.9516	21.0638	-0.793155	1.10038	-1.89353	0.577081	2.14411	0.269147		9	9	9	40.4	40.4	40.4	33.526	33.989	7153600	23	0	2	4	1	7	3	0	2	4	1	7	3	0	2	4	1	7	3	0	7.2	20.5
Q6PGP7	Tetratricopeptide repeat protein 37	TTC37	18.7427	19.7144	19.2285	21.0134	19.9251	20.4693	21.4181	20.8	21.1091	-1.24075	0.639805	-1.88056	0.423153	1.55812	0.271579		24	24	24	19.2	19.2	19.2	175.48	86.73	7131000	44	0	3	8	3	19	11	0	3	8	3	19	11	0	3	8	3	19	11	0	1.8	5.8
Q14789	Golgin subfamily B member 1	GOLGB1	17.9781	18.9185	18.4483	20.4223	19.626	20.0242	21.388	21.0534	21.2207	-1.57583	1.19652	-2.77235	0.335449	2.29186	0.146365		40	40	40	16.5	16.5	16.5	376.01	323.31	11769000	60	1	3	8	4	25	17	1	3	8	4	25	17	1	3	8	4	25	17	0.3	1.2	3
Q12874	Splicing factor 3A subunit 3	SF3A3	18.0561	18.9795	18.5178	21.2418	19.8526	20.5472	23.2706	20.9734	22.122	-2.02941	1.57475	-3.60416	0.244955	2.97884	0.0822318		11	11	11	35.1	35.1	35.1	58.848	63.224	21239000	32	1	1	3	2	9	5	1	1	3	2	9	5	1	1	3	2	9	5	2.4	2.4	6.8
P51553	Isocitrate dehydrogenase [NAD] subunit gamma, mitochondrial	IDH3G	16.3811	19.7439	18.0625	21.3743	20.4102	20.8922	22.3758	21.9278	22.1518	-2.82972	1.2596	-4.08932	0.14066	2.39429	0.0587479		7	7	7	24.4	24.4	24.4	42.794	27.319	13462000	24	1	2	2	3	6	3	1	2	2	3	6	3	1	2	2	3	6	3	2.8	8.7	4.6
P51398	28S ribosomal protein S29, mitochondrial	DAP3	18.3054	20.014	19.1597	20.8326	21.0057	20.9191	20.914	21.2087	21.0614	-1.75942	0.142235	-1.90166	0.295367	1.10361	0.267636		11	11	11	37.7	37.7	37.7	45.566	69.763	9031800	36	0	2	4	4	9	9	0	2	4	4	9	9	0	2	4	4	9	9	0	6.3	11.8
O14617	AP-3 complex subunit delta-1	AP3D1	18.5731	20.1953	19.3842	19.2578	20.7533	20.0056	22.0644	20.871	21.4677	-0.62135	1.46218	-2.08353	0.650062	2.75523	0.235937		16	16	16	19.1	19.1	19.1	130.16	58.618	8842400	49	1	3	2	2	14	8	1	3	2	2	14	8	1	3	2	2	14	8	1.1	3.8	1.9
P35573	Glycogen debranching enzyme;4-alpha-glucanotransferase;Amylo-alpha-1,6-glucosidase	AGL	18.8643	19.7213	19.2928	21.0394	21.2678	21.1536	21.7432	21.5524	21.6478	-1.86081	0.494225	-2.35503	0.275323	1.40856	0.195463		26	26	26	23.3	23.3	23.3	174.76	84.557	10068000	50	3	3	8	5	19	11	3	3	8	5	19	11	3	3	8	5	19	11	2.5	2.2	5.9
Q9UQE7	Structural maintenance of chromosomes protein 3	SMC3	19.9959	19.0048	19.5003	22.6011	21.6846	22.1428	21.5424	19.7759	20.6592	-2.64248	-1.48365	-1.15883	0.160153	0.357584	0.447876		30	30	30	26.5	26.5	26.5	141.54	185.72	18599000	59	4	3	18	10	19	0	4	3	18	10	19	0	4	3	18	10	19	0	4.3	2.8	16.2
Q9UHD2	Serine/threonine-protein kinase TBK1	TBK1	19.1589	18.8927	19.0258	20.7014	20.8696	20.7855	21.2335	20.4633	20.8484	-1.75971	0.062885	-1.82259	0.295309	1.04455	0.282713	+	12	12	12	21.9	21.9	21.9	83.641	43.603	10939000	19	2	0	3	2	7	6	2	0	3	2	7	6	2	0	3	2	7	6	3.3	0	4.3
Q8TEA8	D-tyrosyl-tRNA(Tyr) deacylase 1	DTD1	18.8216	18.1495	18.4856	20.3155	20.6002	20.4579	22.2715	21.0843	21.6779	-1.97232	1.22	-3.19232	0.254844	2.32947	0.1094	+	2	2	2	14.8	14.8	14.8	23.423	35.289	8004400	19	1	1	2	2	2	2	1	1	2	2	2	2	1	1	2	2	2	2	7.2	7.2	14.8
Q5JTH9	RRP12-like protein	RRP12	19.1814	19.642	19.4117	20.9401	21.0458	20.993	22.1499	20.6713	21.4106	-1.58127	0.417645	-1.99892	0.334186	1.33575	0.250187	+	24	24	24	26.4	26.4	26.4	143.7	144.54	13501000	55	2	3	6	4	20	9	2	3	6	4	20	9	2	3	6	4	20	9	2.1	2.6	6.1
Q16539	Mitogen-activated protein kinase 14	MAPK14	19.6577	18.8405	19.2491	20.955	20.8219	20.8884	20.6057	20.5841	20.5949	-1.63936	-0.29356	-1.3458	0.320999	0.815886	0.393436		8	8	8	35.3	35.3	35.3	41.293	18.363	6094500	20	3	0	3	3	5	6	3	0	3	3	5	6	3	0	3	3	5	6	9.7	0	8.3
Q15645	Pachytene checkpoint protein 2 homolog	TRIP13	20.0011	18.3709	19.186	21.0348	20.6946	20.8647	20.6756	21.0015	20.8385	-1.67869	-0.026175	-1.65252	0.312365	0.98202	0.318084		10	10	10	28.9	28.9	28.9	48.55	35.207	10212000	22	3	1	4	5	4	5	3	1	4	5	4	5	3	1	4	5	4	5	7.6	2.5	10.6
Q15021;REV__Q02790	Condensin complex subunit 1	NCAPD2	18.9512	18.5219	18.7366	20.6225	20.3503	20.4864	21.5065	20.7689	21.1377	-1.74986	0.65129	-2.40115	0.29733	1.57057	0.189313	+	23	23	23	20.1	20.1	20.1	157.18	53.31	8544400	48	3	2	4	7	17	9	3	2	4	7	17	9	3	2	4	7	17	9	2	1.6	3
P60520	Gamma-aminobutyric acid receptor-associated protein-like 2	GABARAPL2	18.659	18.6733	18.6662	19.779	21.4763	20.6276	20.2011	21.0715	20.6363	-1.96146	0.00867	-1.97013	0.256769	1.00603	0.255231		5	5	5	49.6	49.6	49.6	13.667	7.7561	2251900	13	1	2	0	2	4	2	1	2	0	2	4	2	1	2	0	2	4	2	12.8	15.4	0
P52735	Guanine nucleotide exchange factor VAV2	VAV2	20.2912	19.1272	19.7092	20.3409	21.2455	20.7932	21.1836	19.9367	20.5602	-1.08404	-0.233035	-0.85101	0.471704	0.850843	0.554396		14	14	14	22.4	22.4	22.4	101.29	136.06	14632000	49	7	2	6	3	9	4	7	2	6	3	9	4	7	2	6	3	9	4	10.9	3.4	8.9
O43172	U4/U6 small nuclear ribonucleoprotein Prp4	PRPF4	19.1277	17.8986	18.5131	21.2544	21.1248	21.1896	21.9095	20.4885	21.199	-2.67645	0.009435	-2.68588	0.156426	1.00656	0.155407	+	12	12	12	32	32	32	58.449	41.662	14317000	38	2	1	6	6	9	5	2	1	6	6	9	5	2	1	6	6	9	5	5	2.7	12.8
P35250	Replication factor C subunit 2	RFC2	18.4094	17.7343	18.0719	20.9244	20.5248	20.7246	21.5793	20.1246	20.852	-2.65274	0.12738	-2.78012	0.159018	1.09231	0.14558	+	5	5	5	16.7	16.7	16.7	39.157	37.449	6461100	12	0	0	3	2	2	4	0	0	3	2	2	4	0	0	3	2	2	4	0	0	11.9
Q9P0R6	GSK3-beta interaction protein	GSKIP	20.9184	19.5634	20.2409	19.7034	19.5525	19.6279	21.4052	21.523	21.4641	0.61299	1.83615	-1.22316	1.52943	3.57055	0.428345		4	4	4	39.6	39.6	39.6	15.648	63.27	4018100	12	2	0	0	1	4	3	2	0	0	1	4	3	2	0	0	1	4	3	15.1	0	0
Q4J6C6	Prolyl endopeptidase-like	PREPL	21.5838	20.8132	21.1985	21.088	20.0843	20.5861	21.4002	21.1061	21.2531	0.612345	0.667015	-0.05467	1.52874	1.58778	0.962815		13	13	13	27.2	27.2	27.2	83.926	46.93	10020000	30	4	3	2	1	9	8	4	3	2	1	9	8	4	3	2	1	9	8	6.1	4.7	3.2
Q13409	Cytoplasmic dynein 1 intermediate chain 2	DYNC1I2	20.9125	20.9496	20.931	21.5152	19.1634	20.3393	21.3855	21.8859	21.6357	0.591765	1.29641	-0.704645	1.50709	2.45617	0.613593		10	10	10	27.1	27.1	27.1	71.456	55.503	21173000	35	4	1	5	1	5	6	4	1	5	1	5	6	4	1	5	1	5	6	9.6	2.2	13.6
O60437	Periplakin	PPL	20.8807	20.0474	20.464	20.6467	20.077	20.3619	20.9627	21.0267	20.9947	0.10218	0.63282	-0.53064	1.07339	1.55059	0.692248		31	31	31	22.7	22.7	22.7	204.74	160.91	15494000	63	9	2	6	3	19	15	9	2	6	3	19	15	9	2	6	3	19	15	6.3	1.2	3.2
P46109	Crk-like protein	CRKL	20.9726	20.1034	20.538	20.5819	18.9121	19.747	21.3999	21.2904	21.3452	0.79105	1.59819	-0.80714	1.73033	3.02763	0.571514		14	14	14	52.1	52.1	52.1	33.777	61.215	7490500	27	2	2	3	1	8	8	2	2	3	1	8	8	2	2	3	1	8	8	9.6	8.9	12.9
Q96EK5	KIF1-binding protein	KIAA1279	19.9038	20.3507	20.1272	21.7467	18.5669	20.1568	20.9391	20.9004	20.9197	-0.029545	0.762955	-0.7925	0.979729	1.69696	0.577343		10	10	10	30.4	30.4	30.4	71.813	92.988	13083000	25	1	2	4	1	4	7	1	2	4	1	4	7	1	2	4	1	4	7	3.4	4.8	8.5
Q86XP3	ATP-dependent RNA helicase DDX42	DDX42	20.1075	20.9678	20.5377	20.8096	18.5673	19.6884	21.0201	21.3834	21.2018	0.849225	1.51333	-0.66411	1.80153	2.85469	0.631078		18	18	18	26.7	26.7	26.7	102.97	55.713	12497000	50	5	2	5	1	11	11	5	2	5	1	11	11	5	2	5	1	11	11	8.7	2.6	5.4
Q7LG56	Ribonucleoside-diphosphate reductase subunit M2 B	RRM2B	19.1845	19.7979	19.4912	21.5215	18.9534	20.2374	21.7198	21.3859	21.5529	-0.746185	1.31544	-2.06163	0.596178	2.48879	0.239545		6	5	5	21.4	18.8	18.8	40.736	23.84	13414000	21	2	2	3	2	6	6	1	1	2	1	5	5	1	1	2	1	5	5	8	5.7	11.1
Q15758	Neutral amino acid transporter B(0)	SLC1A5	19.758	21.1735	20.4658	21.2476	18.5118	19.8797	21.445	21.6114	21.5282	0.58605	1.64851	-1.06246	1.50113	3.13511	0.478813		9	9	9	20.7	20.7	20.7	56.598	86.212	17612000	42	5	4	3	2	4	5	5	4	3	2	4	5	5	4	3	2	4	5	11.1	9.4	6.5
P78406	mRNA export factor	RAE1	19.1511	20.9481	20.0496	21.2449	18.662	19.9535	21.258	21.0169	21.1374	0.096155	1.18396	-1.0878	1.06892	2.27199	0.470478		10	10	10	34.2	34.2	34.2	40.968	78.865	8671600	24	0	3	2	1	7	8	0	3	2	1	7	8	0	3	2	1	7	8	0	10.9	7.1
P30533	Alpha-2-macroglobulin receptor-associated protein	LRPAP1	19.2704	20.077	19.6737	21.0048	18.1199	19.5624	20.6295	20.2709	20.4502	0.111325	0.88787	-0.776545	1.08022	1.85044	0.583763		10	10	10	35	35	35	41.465	17.055	6568200	17	2	0	6	1	4	4	2	0	6	1	4	4	2	0	6	1	4	4	9.2	0	21.6
P53007	Tricarboxylate transport protein, mitochondrial	SLC25A1	20.1502	19.6258	19.888	21.0312	18.7427	19.887	20.8822	21.5594	21.2208	0.00105	1.33385	-1.3328	1.00073	2.52074	0.396998		5	5	5	17.4	17.4	17.4	34.012	12.071	13027000	17	4	1	4	1	2	2	4	1	4	1	2	2	4	1	4	1	2	2	13.8	3.9	13.8
Q9NQX3	Gephyrin;Molybdopterin adenylyltransferase;Molybdopterin molybdenumtransferase	GPHN	18.4	20.6158	19.5079	20.2193	21.0223	20.6208	20.209	21.2099	20.7094	-1.1129	0.08862	-1.20152	0.462364	1.06335	0.434817		11	11	11	20.1	20.1	20.1	79.748	38.974	14758000	33	5	4	5	4	3	3	5	4	5	4	3	3	5	4	5	4	3	3	10.2	6.5	8.8
Q8WVY7	Ubiquitin-like domain-containing CTD phosphatase 1	UBLCP1	18.9379	20.9641	19.951	20.5221	21.108	20.8151	20.6006	20.3503	20.4755	-0.86408	-0.339585	-0.524495	0.549397	0.790269	0.695202		6	6	6	18.6	18.6	18.6	36.804	9.1955	12233000	19	0	3	4	4	5	3	0	3	4	4	5	3	0	3	4	4	5	3	0	8.8	10.7
Q15006	ER membrane protein complex subunit 2	EMC2	18.6506	21.8587	20.2547	20.8244	21.5462	21.1853	20.4576	20.0272	20.2424	-0.930605	-0.94287	0.012265	0.524638	0.520197	1.00854		5	5	5	20.5	20.5	20.5	34.833	14.707	8535200	16	0	3	3	3	3	0	0	3	3	3	3	0	0	3	3	3	3	0	0	11.8	10.8
P06132	Uroporphyrinogen decarboxylase	UROD	18.6139	20.61	19.612	20.6725	20.5354	20.6039	20.3625	20.59	20.4763	-0.99197	-0.12768	-0.86429	0.502791	0.915302	0.549317		6	6	6	22.6	22.6	22.6	40.786	55.627	10441000	22	2	3	3	3	2	4	2	3	3	3	2	4	2	3	3	3	2	4	5.7	10.4	8.4
O15160	DNA-directed RNA polymerases I and III subunit RPAC1	POLR1C	18.2066	19.699	18.9528	20.2552	21.0064	20.6308	20.2609	20.4394	20.3501	-1.67801	-0.2807	-1.39731	0.312513	0.823192	0.379636		9	9	9	34.4	34.4	34.4	39.249	20.573	9137200	24	0	2	3	3	6	5	0	2	3	3	6	5	0	2	3	3	6	5	0	6.6	11
O94776	Metastasis-associated protein MTA2	MTA2	18.3771	20.2236	19.3004	20.4735	20.705	20.5892	19.612	20.4237	20.0178	-1.28885	-0.5714	-0.71745	0.409277	0.672963	0.608171		8	8	7	14.5	14.5	13.5	75.022	14.074	6821700	21	1	2	4	5	5	1	1	2	4	5	5	1	1	2	4	4	5	1	2.4	3.1	7.3
Q9Y2S7	Polymerase delta-interacting protein 2	POLDIP2	20.1441	19.9663	20.0552	20.9094	21.6731	21.2912	20.4778	20.8901	20.684	-1.23602	-0.607275	-0.62874	0.424544	0.656435	0.646741		8	8	8	31.5	31.5	31.5	42.033	58.753	11726000	29	4	2	3	3	5	4	4	2	3	3	5	4	4	2	3	3	5	4	13.6	6.5	10.9
Q99829	Copine-1	CPNE1	20.1088	19.4194	19.7641	20.2578	21.011	20.6344	20.512	21.6428	21.0774	-0.87029	0.44302	-1.31331	0.547037	1.35945	0.402397		10	10	10	21.8	21.8	21.8	59.058	21.979	10094000	28	2	1	3	5	6	5	2	1	3	5	6	5	2	1	3	5	6	5	3.4	1.7	5
Q96DI7	U5 small nuclear ribonucleoprotein 40 kDa protein	SNRNP40	20.5166	21.0697	20.7932	20.8029	22.1952	21.4991	20.45	21.1411	20.7955	-0.705875	-0.703515	-0.00236	0.613071	0.614074	0.998366		7	7	7	19.9	19.9	19.9	39.31	44.522	14814000	33	4	3	4	3	4	5	4	3	4	3	4	5	4	3	4	3	4	5	10.6	10.4	12.9
Q6DD88	Atlastin-3	ATL3	19.9026	19.2822	19.5924	21.3792	21.039	21.2091	20.372	20.7967	20.5843	-1.61669	-0.62475	-0.991945	0.326082	0.648532	0.502799	+	12	12	12	35.3	35.3	35.3	60.541	126.32	16388000	34	5	1	4	3	8	6	5	1	4	3	8	6	5	1	4	3	8	6	17.6	3.5	10.7
Q5JVF3	PCI domain-containing protein 2	PCID2	20.15	19.5069	19.8285	20.643	20.478	20.5605	20.6921	20.6904	20.6912	-0.732045	0.130735	-0.86278	0.60205	1.09485	0.549892		9	9	9	26.6	26.6	26.6	46.029	47.898	6601200	30	3	1	4	5	6	6	3	1	4	5	6	6	3	1	4	5	6	6	8.5	4	12.5
Q14139	Ubiquitin conjugation factor E4 A	UBE4A	20.2548	20.6158	20.4353	21.1112	21.2896	21.2004	20.3812	20.0668	20.224	-0.765125	-0.976365	0.21124	0.588402	0.508259	1.15768		13	13	13	16.4	16.4	16.4	122.56	38.138	14024000	53	7	2	9	5	5	5	7	2	9	5	5	5	7	2	9	5	5	5	7.8	2.2	10
Q0VDF9	Heat shock 70 kDa protein 14	HSPA14	20.1615	20.1155	20.1385	20.8684	21.2209	21.0447	19.9947	20.1668	20.0807	-0.90613	-0.963925	0.057795	0.533615	0.51266	1.04087	+	9	9	9	22.4	22.4	22.4	54.794	53.04	13119000	30	5	3	6	4	2	5	5	3	6	4	2	5	5	3	6	4	2	5	15.3	6.3	13.6
P40123	Adenylyl cyclase-associated protein 2	CAP2	20.2828	20.0997	20.1912	20.5232	21.6873	21.1052	19.3057	21.1955	20.2506	-0.914025	-0.854655	-0.05937	0.530702	0.552998	0.959683		11	10	10	27.3	25.6	25.6	52.823	67.273	12019000	28	7	4	4	5	1	5	6	3	3	4	1	5	6	3	3	4	1	5	17.4	9	10.7
Q9UQ88;P21127	Cyclin-dependent kinase 11A;Cyclin-dependent kinase 11B	CDK11A;CDK11B	19.7099	19.9126	19.8112	21.0787	20.9804	21.0296	19.6913	20.2313	19.9613	-1.21832	-1.06825	-0.150065	0.429783	0.476895	0.90121	+	9	9	8	11.2	11.2	10.2	91.361	29.246	8845900	28	3	0	4	4	8	6	3	0	4	4	8	6	2	0	4	4	7	6	4	0	5.5
O00273	DNA fragmentation factor subunit alpha	DFFA	20.4222	20.344	20.3831	20.8146	20.857	20.8358	19.9848	20.2573	20.1211	-0.452735	-0.71478	0.262045	0.730656	0.609298	1.19918	+	10	10	10	34.7	34.7	34.7	36.521	45.069	9282800	34	3	3	4	5	4	6	3	3	4	5	4	6	3	3	4	5	4	6	12.4	8.2	10.9
P08559;P29803	Pyruvate dehydrogenase E1 component subunit alpha, somatic form, mitochondrial	PDHA1	19.8968	20.4089	20.1529	21.5166	20.3394	20.928	20.2163	21.1127	20.6645	-0.775125	-0.2635	-0.511625	0.584338	0.833064	0.701432		10	10	10	24.4	24.4	24.4	43.295	20.234	14759000	36	4	2	5	4	4	3	4	2	5	4	4	3	4	2	5	4	4	3	10.5	4.6	11.3
Q9Y570	Protein phosphatase methylesterase 1	PPME1	20.8331	20.7155	20.7743	20.5404	20.6714	20.6059	20.1729	20.1316	20.1522	0.168415	-0.453655	0.62207	1.12382	0.730191	1.53908		9	9	9	31.3	31.3	31.3	42.315	25.829	11728000	42	3	6	4	5	2	5	3	6	4	5	2	5	3	6	4	5	2	5	9.3	21.2	12.4
Q9Y277	Voltage-dependent anion-selective channel protein 3	VDAC3	21.2292	21.0075	21.1183	19.6508	21.2095	20.4301	20.3062	20.4766	20.3914	0.68819	-0.03873	0.72692	1.61126	0.973512	1.6551		6	6	6	25.4	25.4	25.4	30.658	18.545	7499800	23	4	3	1	3	3	4	4	3	1	3	3	4	4	3	1	3	3	4	12.7	12.4	4.6
Q9UNF1;Q12816	Melanoma-associated antigen D2	MAGED2	19.6465	20.593	20.1198	20.1278	20.0946	20.1112	20.799	20.9372	20.8681	0.008585	0.75691	-0.748325	1.00597	1.68987	0.595294		14	14	13	31.8	31.8	29.9	64.953	61.257	7481400	49	3	3	3	4	10	7	3	3	3	4	10	7	2	2	3	3	10	6	5.9	5.4	7.6
Q9UNF0	Protein kinase C and casein kinase substrate in neurons protein 2	PACSIN2	21.3264	20.804	21.0652	19.7912	20.1975	19.9943	20.5467	19.6533	20.1	1.07086	0.10572	0.965145	2.10069	1.07603	1.95226		7	7	7	15	15	15	55.738	19.898	8643200	24	2	3	2	2	2	5	2	3	2	2	2	5	2	3	2	2	2	5	4.1	6	4.1
Q96T51	RUN and FYVE domain-containing protein 1	RUFY1	20.3721	21.2991	20.8356	19.8204	20.5546	20.1875	20.6935	20.4536	20.5736	0.648065	0.386065	0.262	1.56706	1.30682	1.19914		11	11	10	18.8	18.8	17.7	79.817	33.069	8635600	36	3	5	4	4	5	6	3	5	4	4	5	6	3	5	3	4	5	6	5.4	8.2	5.5
Q8NBF2	NHL repeat-containing protein 2	NHLRC2	20.0956	20.8748	20.4852	19.81	19.9562	19.8831	20.4894	20.581	20.5352	0.602145	0.65208	-0.049935	1.51797	1.57143	0.96598		13	13	13	26.7	26.7	26.7	79.443	80.368	10492000	42	5	4	5	4	4	8	5	4	5	4	4	8	5	4	5	4	4	8	8.4	6.7	8.4
Q14651	Plastin-1	PLS1	20.7298	20.5639	20.6469	20.6299	21.117	20.8735	20.882	20.0739	20.478	-0.226585	-0.395485	0.1689	0.854656	0.760234	1.1242		12	9	9	25.9	20.3	20.3	70.253	32.158	18344000	22	7	4	3	4	6	6	4	3	2	3	4	5	4	3	2	3	4	5	15.6	8.1	5.9
P51153	Ras-related protein Rab-13	RAB13	20.8715	21.2188	21.0451	20.7943	20.7669	20.7806	20.8007	19.4871	20.1439	0.264525	-0.63673	0.901255	1.20124	0.643169	1.86769		7	4	4	40.4	27.6	27.6	22.774	23.88	5831000	27	6	5	6	6	7	2	3	2	3	3	4	1	3	2	3	3	4	1	31	24.1	31
P36915	Guanine nucleotide-binding protein-like 1	GNL1	20.5995	20.6013	20.6004	20.2269	20.6397	20.4333	21.2392	20.3486	20.7939	0.16709	0.360575	-0.193485	1.12279	1.28394	0.874491		14	14	14	30	30	30	68.66	57.746	9894300	43	5	2	5	5	9	8	5	2	5	5	9	8	5	2	5	5	9	8	8.9	4.1	8.9
P34949	Mannose-6-phosphate isomerase	MPI	21.0374	21.6892	21.3633	18.5092	20.3209	19.4151	20.6019	20.1862	20.394	1.94823	0.978945	0.969285	3.85901	1.97102	1.95787		11	11	11	33.3	33.3	33.3	46.655	146.24	15505000	29	7	4	2	5	2	6	7	4	2	5	2	6	7	4	2	5	2	6	21.3	14.2	6.4
O94826	Mitochondrial import receptor subunit TOM70	TOMM70A	21.0154	21.3976	21.2065	20.0567	20.2917	20.1742	20.1655	19.795	19.9802	1.03233	-0.193955	1.22629	2.04533	0.874206	2.33965	+	9	9	9	18.9	18.9	18.9	67.454	66.295	12168000	21	6	4	5	2	2	0	6	4	5	2	2	0	6	4	5	2	2	0	12	8.9	9.7
P00387	NADH-cytochrome b5 reductase 3;NADH-cytochrome b5 reductase 3 membrane-bound form;NADH-cytochrome b5 reductase 3 soluble form	CYB5R3	20.0329	20.8482	20.4406	19.6095	21.686	20.6478	19.9567	20.4691	20.2129	-0.20718	-0.43483	0.22765	0.866229	0.739781	1.17093		4	4	4	14.3	14.3	14.3	34.234	23.566	13232000	18	2	2	1	3	3	3	2	2	1	3	3	3	2	2	1	3	3	3	6	8	3.7
Q9UI26	Importin-11	IPO11	20.9748	21.7758	21.3753	20.6248	21.2677	20.9462	20.476	20.8146	20.6453	0.429075	-0.30098	0.730055	1.34637	0.811701	1.6587		17	17	17	21.4	21.4	21.4	112.53	57.97	15482000	50	6	7	6	7	8	7	6	7	6	7	8	7	6	7	6	7	8	7	5.5	6.3	6.1
Q9BQ52	Zinc phosphodiesterase ELAC protein 2	ELAC2	20.8339	20.9661	20.9	21.3515	21.3017	21.3266	20.6125	21.2363	20.9244	-0.426615	-0.40219	-0.024425	0.744005	0.756709	0.983212	+	18	18	18	32.2	32.2	32.2	92.218	219.34	18596000	62	5	8	10	8	8	5	5	8	10	8	8	5	5	8	10	8	8	5	8	11	14.9
Q96A65	Exocyst complex component 4	EXOC4	20.7013	21.5567	21.129	20.564	20.4836	20.5238	20.8857	20.8042	20.8449	0.605195	0.32116	0.284035	1.52118	1.24933	1.2176		14	14	14	19.4	19.4	19.4	110.5	122.46	8429300	48	5	5	3	3	9	8	5	5	3	3	9	8	5	5	3	3	9	8	7.3	6.6	4.6
Q92783	Signal transducing adapter molecule 1	STAM	20.8933	21.7117	21.3025	21.4571	19.6024	20.5298	19.5498	21.249	20.3994	0.772765	-0.13037	0.903135	1.70854	0.913597	1.87013		4	4	3	9.6	9.6	7.8	59.179	14.856	18285000	18	2	2	2	3	1	3	2	2	2	3	1	3	1	1	2	2	0	2	4.1	4.1	4.8
Q6IA86	Elongator complex protein 2	ELP2	20.6533	21.5495	21.1014	21.2364	20.4606	20.8485	20.7961	20.9295	20.8628	0.252875	0.014235	0.23864	1.19158	1.00992	1.17988		12	12	12	19.4	19.4	19.4	92.499	56.155	14020000	40	3	6	3	4	7	6	3	6	3	4	7	6	3	6	3	4	7	6	4.2	7.4	3.6
Q15020	Squamous cell carcinoma antigen recognized by T-cells 3	SART3	20.8762	21.2198	21.048	20.516	20.4466	20.4813	21.0016	20.469	20.7353	0.56669	0.253995	0.312695	1.48112	1.1925	1.24203		16	16	16	22.9	22.9	22.9	109.93	101.99	15818000	43	8	5	3	3	9	6	8	5	3	3	9	6	8	5	3	3	9	6	11.6	5.8	3.5
P27707	Deoxycytidine kinase	DCK	20.9969	20.6746	20.8358	20.8345	20.6795	20.757	20.3285	20.6777	20.5031	0.07875	-0.253915	0.332665	1.0561	0.838618	1.25934		6	6	6	27.3	27.3	27.3	30.518	19.578	8417500	21	4	3	3	3	3	4	4	3	3	3	3	4	4	3	3	3	3	4	18.1	13.1	13.8
Q06124	Tyrosine-protein phosphatase non-receptor type 11	PTPN11	21.2588	21.443	21.3509	20.8033	20.8898	20.8466	20.6716	21.556	21.1138	0.504365	0.26726	0.237105	1.4185	1.20352	1.17863	+	17	17	17	37.5	37.5	37.5	68.436	53.188	13542000	49	4	5	4	3	8	10	4	5	4	3	8	10	4	5	4	3	8	10	7.9	9	7.5
Q9Y3P9	Rab GTPase-activating protein 1	RABGAP1	19.1715	19.6205	19.396	20.277	19.1544	19.7157	21.3313	17.7041	19.5177	-0.31967	-0.19795	-0.12172	0.801253	0.871788	0.919091		15	15	15	13.9	13.9	13.9	121.74	73.366	6076300	35	5	2	4	3	12	1	5	2	4	3	12	1	5	2	4	3	12	1	6.4	2.7	4.7
Q9P2R3	Rabankyrin-5	ANKFY1	19.6172	20.1695	19.8934	20.6673	20.3195	20.4934	21.7527	19.4522	20.6025	-0.60005	0.10904	-0.70909	0.659731	1.07851	0.611706		20	20	20	25.7	25.7	25.7	128.4	210.29	11471000	43	4	3	8	6	17	5	4	3	8	6	17	5	4	3	8	6	17	5	4.4	3.1	9.3
Q5H9R7	Serine/threonine-protein phosphatase 6 regulatory subunit 3	PPP6R3	20.7679	20.898	20.833	19.8095	19.6523	19.7309	22.0535	18.7066	20.3801	1.10205	0.64917	0.452875	2.14659	1.56827	1.36877	+	19	19	19	26.1	26.1	26.1	97.668	117.21	18526000	58	8	3	9	5	14	2	8	3	9	5	14	2	8	3	9	5	14	2	11.3	4.1	11.5
P49756	RNA-binding protein 25	RBM25	20.2478	19.4092	19.8285	19.9498	19.1357	19.5427	21.7797	18.3132	20.0464	0.285775	0.503665	-0.21789	1.21906	1.41781	0.859822		13	13	13	17.4	17.4	17.4	100.18	24.827	5827900	24	2	0	3	1	13	0	2	0	3	1	13	0	2	0	3	1	13	0	3.2	0	5.6
P61006;P59190;P20337;Q96E17	Ras-related protein Rab-8A	RAB8A	19.1802	20.3166	19.7484	20.7938	20.7163	20.7551	21.1266	18.6134	19.87	-1.00668	-0.88507	-0.121605	0.497692	0.541461	0.919165		8	6	5	36.2	27.1	23.7	23.668	74.461	3776800	36	6	5	4	6	4	2	4	3	2	4	2	1	4	2	2	3	2	1	29	19.8	21.7
Q9Y315	Deoxyribose-phosphate aldolase	DERA	20.485	20.7866	20.6358	18.6817	20.2805	19.4811	21.5448	18.9567	20.2507	1.15472	0.76964	0.385075	2.2264	1.70484	1.30593		9	9	9	37.1	37.1	37.1	35.23	72.491	8162500	21	6	4	1	4	6	0	6	4	1	4	6	0	6	4	1	4	6	0	26.1	16.4	5
Q13435	Splicing factor 3B subunit 2	SF3B2	20.5292	19.9865	20.2578	18.8139	19.0263	18.9201	22.1577	20.2424	21.2	1.33768	2.27989	-0.942215	2.52745	4.85643	0.520433	+	14	14	14	19	19	19	100.23	21.904	6570500	27	4	0	0	0	12	5	4	0	0	0	12	5	4	0	0	0	12	5	5.8	0	0
Q6AI08	HEAT repeat-containing protein 6	HEATR6	19.8025	19.6664	19.7344	19.7684	19.8903	19.8293	23.3892	20.782	22.0856	-0.09491	2.25622	-2.35113	0.936331	4.77736	0.195993		24	24	24	27.3	27.3	27.3	128.78	115.9	18822000	73	5	2	4	6	22	2	5	2	4	6	22	2	5	2	4	6	22	2	5.3	2.4	4.7
Q96KB5	Lymphokine-activated killer T-cell-originated protein kinase	PBK	20.0489	19.2875	19.6682	20.5146	16.6266	18.5706	20.4137	19.7011	20.0574	1.09758	1.48677	-0.389195	2.13995	2.80261	0.763556		5	5	5	17.4	17.4	17.4	36.085	11.715	7956800	19	3	1	3	1	3	3	3	1	3	1	3	3	3	1	3	1	3	3	10.2	2.8	10.6
Q96H20	Vacuolar-sorting protein SNF8	SNF8	20.1543	19.6248	19.8895	20.4848	18.8748	19.6798	20.164	20.2534	20.2087	0.20972	0.528905	-0.319185	1.15646	1.44283	0.801523		3	3	3	13.6	13.6	13.6	28.864	29.018	6201800	14	3	1	2	2	2	1	3	1	2	2	2	1	3	1	2	2	2	1	13.6	4.7	8.1
Q7Z3U7	Protein MON2 homolog	MON2	20.5265	18.8945	19.7105	20.8	18.4721	19.6361	20.8264	21.5174	21.1719	0.07446	1.53584	-1.46138	1.05297	2.89957	0.363146		18	18	18	12.6	12.6	12.6	190.36	47.833	5789500	36	2	1	5	1	14	11	2	1	5	1	14	11	2	1	5	1	14	11	1	0.8	3.3
Q01433	AMP deaminase 2	AMPD2	21.5069	19.6567	20.5818	20.2368	18.8393	19.5381	19.923	20.8372	20.3801	1.04376	0.842055	0.201705	2.06159	1.7926	1.15006		14	14	14	18.2	18.2	18.2	100.69	18.312	12654000	32	8	4	5	1	3	6	8	4	5	1	3	6	8	4	5	1	3	6	10.8	4.3	7.1
P54652	Heat shock-related 70 kDa protein 2	HSPA2	20.6074	18.7659	19.6866	21.0359	18.3316	19.6837	20.4673	20.2797	20.3735	0.002885	0.689775	-0.68689	1.002	1.61303	0.621192		22	9	9	37.6	17.2	17.2	70.02	34.577	12741000	22	16	9	11	11	15	11	6	1	2	2	4	3	6	1	2	2	4	3	26.4	13.9	16.9
P24941;Q00526	Cyclin-dependent kinase 2	CDK2	20.506	19.3367	19.9214	20.3665	17.8136	19.09	20.5923	20.8566	20.7244	0.83134	1.63441	-0.803065	1.77934	3.10459	0.57313		7	5	5	29.5	23.2	23.2	33.929	23.954	6665600	23	4	3	5	3	7	6	2	1	3	1	5	4	2	1	3	1	5	4	14.1	11.1	21.8
P10515	Dihydrolipoyllysine-residue acetyltransferase component of pyruvate dehydrogenase complex, mitochondrial	DLAT	20.3846	19.5138	19.9492	20.3466	18.7102	19.5284	19.9369	21.3422	20.6396	0.42085	1.1112	-0.690355	1.33872	2.16026	0.619701		10	10	10	18.1	18.1	18.1	68.996	71.541	12149000	22	6	3	3	1	3	4	6	3	3	1	3	4	6	3	3	1	3	4	12.1	6.6	4
P05109	Protein S100-A8;Protein S100-A8, N-terminally processed	S100A8	20.7116	18.86	19.7858	21.7581	17.6448	19.7015	18.6041	20.5414	19.5727	0.084325	-0.128715	0.21304	1.06019	0.914646	1.15913		3	3	3	31.2	31.2	31.2	10.834	18.677	15937000	36	3	1	3	1	1	2	3	1	3	1	1	2	3	1	3	1	1	2	31.2	11.8	31.2
P09493	Tropomyosin alpha-1 chain	TPM1	20.3492	17.9991	19.1741	21.0393	17.9023	19.4708	20.818	20.4167	20.6173	-0.296715	1.14651	-1.44322	0.814104	2.21378	0.367744		16	8	6	38.4	25	20.1	32.708	64.564	9126300	21	8	2	5	2	12	4	4	0	3	0	5	2	3	0	2	0	3	1	24.6	8.1	21.1
Q9Y6Y8	SEC23-interacting protein	SEC23IP	20.0704	19.5532	19.8118	19.2349	18.5987	18.9168	20.8563	19.931	20.3937	0.89502	1.47689	-0.581875	1.85964	2.78349	0.668095		12	12	12	17.4	17.4	17.4	111.08	31.929	6853800	25	5	0	3	2	9	3	5	0	3	2	9	3	5	0	3	2	9	3	7.7	0	2.9
Q9Y5S9	RNA-binding protein 8A	RBM8A	20.8329	18.2397	19.5363	19.5483	18.6718	19.1101	21.2678	20.4629	20.8654	0.426245	1.7553	-1.32906	1.34373	3.37597	0.398029		4	4	4	22.4	22.4	22.4	19.889	19.453	4245200	26	2	2	1	3	2	2	2	2	1	3	2	2	2	2	1	3	2	2	17.2	11.5	5.2
Q9Y5R8	Trafficking protein particle complex subunit 1	TRAPPC1	21.0427	19.5784	20.3105	18.8686	17.6077	18.2381	21.9071	21.6147	21.7609	2.0724	3.52281	-1.45041	4.20584	11.494	0.365917		4	4	4	32.4	32.4	32.4	16.831	9.877	3040500	19	2	1	0	1	4	2	2	1	0	1	4	2	2	1	0	1	4	2	13.8	6.9	0
Q9Y237	Peptidyl-prolyl cis-trans isomerase NIMA-interacting 4	PIN4	20.5271	19.27	19.8985	18.1074	18.1272	18.1173	21.3303	20.2037	20.767	1.7812	2.64967	-0.868475	3.43711	6.27524	0.547726		3	3	3	18.3	18.3	18.3	13.81	7.1357	1528100	8	3	0	0	1	2	2	3	0	0	1	2	2	3	0	0	1	2	2	18.3	0	0
Q9UBB6	Neurochondrin	NCDN	19.2761	19.6994	19.4877	19.1031	17.2603	18.1817	20.9216	20.3988	20.6602	1.30605	2.47854	-1.17249	2.47264	5.57333	0.443655		10	10	10	15.6	15.6	15.6	78.863	58.451	8063500	32	2	4	2	1	5	8	2	4	2	1	5	8	2	4	2	1	5	8	3.2	6.7	3.6
Q9HCN8	Stromal cell-derived factor 2-like protein 1	SDF2L1	21.4288	17.7346	19.5817	18.551	17.2511	17.901	20.7035	20.3761	20.5398	1.68063	2.63874	-0.95811	3.20568	6.22788	0.514731		4	4	4	35.7	35.7	35.7	23.598	42.048	4773800	12	3	0	0	0	3	2	3	0	0	0	3	2	3	0	0	0	3	2	25.8	0	0
Q14320;Q9Y247	Protein FAM50A	FAM50A	20.2275	19.6082	19.9179	18.8091	18.4983	18.6537	20.5237	21.3261	20.9249	1.26415	2.2712	-1.00705	2.40186	4.82724	0.497563		6	6	6	21.8	21.8	21.8	40.241	20.332	3165900	15	2	0	1	0	4	4	2	0	1	0	4	4	2	0	1	0	4	4	8.8	0	3.8
P50552	Vasodilator-stimulated phosphoprotein	VASP	20.9627	17.7143	19.3385	18.8222	18.1283	18.4752	20.8782	20.9992	20.9387	0.86327	2.46347	-1.6002	1.81916	5.51544	0.32983		8	8	8	24.5	24.5	24.5	39.829	21.774	5360400	21	3	0	1	0	7	3	3	0	1	0	7	3	3	0	1	0	7	3	9.7	0	3.9
Q07666	KH domain-containing, RNA-binding, signal transduction-associated protein 1	KHDRBS1	21.1067	19.0999	20.1033	19.1146	18.1865	18.6505	21.1091	20.8007	20.9549	1.45278	2.30437	-0.851585	2.73736	4.93952	0.554176		5	5	5	20.5	20.5	20.5	48.227	29.421	16845000	19	2	1	1	1	5	2	2	1	1	1	5	2	2	1	1	1	5	2	5.4	2.3	2.3
Q9UL26;Q13636	Ras-related protein Rab-22A	RAB22A	20.9853	18.6914	19.8383	19.9098	19.5811	19.7454	21.0492	20.762	20.9056	0.09292	1.16018	-1.06726	1.06653	2.23485	0.477224		6	6	6	47.4	47.4	47.4	21.855	41.317	3902800	18	2	1	0	2	6	3	2	1	0	2	6	3	2	1	0	2	6	3	11.3	5.7	0
Q9BPX3	Condensin complex subunit 3	NCAPG	20.3859	19.156	19.7709	19.8918	19.4921	19.6919	20.6034	20.9058	20.7546	0.07902	1.06268	-0.983655	1.0563	2.0888	0.505697		14	14	14	16.7	16.7	16.7	114.33	158.03	7302000	32	3	2	2	2	9	8	3	2	2	2	9	8	3	2	2	2	9	8	4.1	2.4	2.7
Q99961;Q99962	Endophilin-A2	SH3GL1	20.6345	18.0634	19.3489	20.2207	19.1076	19.6642	19.6953	19.7872	19.7412	-0.315215	0.07708	-0.392295	0.803731	1.05488	0.761917		4	4	4	12.2	12.2	12.2	41.489	13.284	5664400	20	3	1	4	1	2	2	3	1	4	1	2	2	3	1	4	1	2	2	9	3.3	12.2
Q14344;P19086	Guanine nucleotide-binding protein subunit alpha-13	GNA13	19.186	17.4963	18.3412	19.8026	20.533	20.1678	20.1383	20.5367	20.3375	-1.82665	0.1697	-1.99635	0.281918	1.12482	0.250633		9	9	8	28.6	28.6	26.5	44.049	29.422	6538500	23	0	0	6	4	6	4	0	0	6	4	6	4	0	0	5	3	6	4	0	0	16.2
P67812	Signal peptidase complex catalytic subunit SEC11A	SEC11A	20.9611	18.1171	19.5391	18.0926	19.1398	18.6162	20.6259	20.4634	20.5447	0.92287	1.92844	-1.00558	1.89588	3.80645	0.498072		3	3	3	16.2	16.2	16.2	20.625	6.1766	3150600	10	2	1	1	1	3	2	2	1	1	1	3	2	2	1	1	1	3	2	9.5	5	5
P62699	Protein yippee-like 5	YPEL5	21.1103	18.048	19.5791	18.6619	18.9517	18.8068	19.9119	19.7481	19.83	0.77234	1.02322	-0.250875	1.70804	2.03244	0.840387		2	2	2	21.5	21.5	21.5	13.841	14.3	1923300	12	2	1	1	1	2	2	2	1	1	1	2	2	2	1	1	1	2	2	21.5	9.9	11.6
P61020	Ras-related protein Rab-5B	RAB5B	21.1065	18.3021	19.7043	18.1039	19.3181	18.711	20.0806	20.3514	20.216	0.99335	1.50502	-0.511665	1.9908	2.83828	0.701412		7	4	4	42.3	27.4	27.4	23.707	32.654	6323200	34	4	3	3	3	7	6	2	1	1	1	4	3	2	1	1	1	4	3	22.3	15.8	15.8
P36551	Oxygen-dependent coproporphyrinogen-III oxidase, mitochondrial	CPOX	21.0929	18.3539	19.7234	20.1456	20.0158	20.0807	20.1116	20.2364	20.174	-0.357255	0.09334	-0.450595	0.780648	1.06684	0.731741		10	10	10	28.6	28.6	28.6	50.151	22.673	7655700	25	4	0	5	4	5	3	4	0	5	4	5	3	4	0	5	4	5	3	8.8	0	12.1
O14964	Hepatocyte growth factor-regulated tyrosine kinase substrate	HGS	20.4046	18.1038	19.2542	19.8289	20.0684	19.9487	20.5337	20.0194	20.2766	-0.694465	0.32793	-1.02239	0.617938	1.25521	0.492298		9	9	9	11.1	11.1	11.1	86.191	30.828	6517300	28	2	2	4	1	5	5	2	2	4	1	5	5	2	2	4	1	5	5	3	2.7	5.4
O60493	Sorting nexin-3	SNX3	20.8297	18.5275	19.6786	18.8052	20.3805	19.5928	21.152	19.0542	20.1031	0.0858	0.51028	-0.42448	1.06128	1.42433	0.745107		8	6	6	51.9	47.5	47.5	18.762	13.325	2745800	18	5	1	0	4	6	1	4	0	0	2	5	1	4	0	0	2	5	1	28.4	4.3	0
Q9GZT3	SRA stem-loop-interacting RNA-binding protein, mitochondrial	SLIRP	23.2674	18.5538	20.9106	19.4698	19.3234	19.3966	23.2432	23.2418	23.2425	1.514	3.84591	-2.33191	2.85601	14.3792	0.198621		6	6	6	55	55	55	12.349	32.622	13627000	27	2	1	1	1	4	5	2	1	1	1	4	5	2	1	1	1	4	5	22	9.2	9.2
Q99627	COP9 signalosome complex subunit 8	COPS8	22.0739	19.4066	20.7402	18.7895	19.8118	19.3007	23.0944	22.2057	22.6501	1.43959	3.34941	-1.90981	2.71244	10.1923	0.266127		7	7	7	53.6	53.6	53.6	23.225	59.99	10053000	34	4	1	1	1	7	3	4	1	1	1	7	3	4	1	1	1	7	3	28.7	6.7	6.7
Q6P587	Acylpyruvase FAHD1, mitochondrial	FAHD1	21.1606	18.1481	19.6544	20.2001	18.8886	19.5444	21.7001	21.8702	21.7852	0.109995	2.24079	-2.1308	1.07922	4.72656	0.228332		3	3	3	27.2	27.2	27.2	24.843	120.07	11895000	34	2	1	2	1	2	2	2	1	2	1	2	2	2	1	2	1	2	2	13.4	6.2	13.4
Q13151	Heterogeneous nuclear ribonucleoprotein A0	HNRNPA0	20.4946	18.0346	19.2646	20.6566	19.1713	19.9139	23.8322	21.9195	22.8759	-0.649305	2.96195	-3.61126	0.637587	7.79179	0.0818281		10	10	10	44.3	44.3	44.3	30.84	76.965	16111000	52	3	0	3	1	10	5	3	0	3	1	10	5	3	0	3	1	10	5	16.1	0	16.1
P62330	ADP-ribosylation factor 6	ARF6	21.7782	19.0606	20.4194	20.1343	18.1176	19.126	21.613	21.5079	21.5604	1.29346	2.43447	-1.14102	2.45114	5.40568	0.453439		5	5	5	44.6	44.6	44.6	20.082	20.141	5639600	29	2	1	0	1	5	3	2	1	0	1	5	3	2	1	0	1	5	3	12.6	6.3	0
P40616	ADP-ribosylation factor-like protein 1	ARL1	21.3042	17.8057	19.5549	20.067	19.0705	19.5687	22.8	22.374	22.587	-0.013785	3.01824	-3.03203	0.99049	8.10179	0.122256		6	6	6	49.7	49.7	49.7	20.417	34.284	11324000	29	3	1	2	1	6	3	3	1	2	1	6	3	3	1	2	1	6	3	18.8	6.1	11
O00204	Sulfotransferase family cytosolic 2B member 1	SULT2B1	22.5416	18.294	20.4178	19.1659	18.1143	18.6401	22.7041	22.1597	22.4319	1.77766	3.7918	-2.01414	3.42871	13.8499	0.247562		14	14	14	47.4	47.4	47.4	41.307	68.786	35003000	37	5	1	3	2	8	6	5	1	3	2	8	6	5	1	3	2	8	6	15.9	3	6.6
O95394	Phosphoacetylglucosamine mutase	PGM3	20.8697	19.3204	20.0951	18.9044	18.6321	18.7683	21.914	21.7246	21.8193	1.3268	3.05101	-1.72421	2.50846	8.28792	0.302664		7	7	7	13.8	13.8	13.8	59.851	48.242	14848000	23	3	1	2	2	4	5	3	1	2	2	4	5	3	1	2	2	4	5	5.5	1.7	3.7
Q9H2H8	Peptidyl-prolyl cis-trans isomerase-like 3	PPIL3	21.3996	17.9157	19.6576	17.6387	17.8774	17.758	21.9229	21.4253	21.6741	1.89962	3.91607	-2.01646	3.73115	15.0958	0.247165		6	6	6	46	46	46	18.154	22.053	4149000	25	2	2	1	2	5	3	2	2	1	2	5	3	2	2	1	2	5	3	15.5	13.7	8.7
Q9BRG1	Vacuolar protein-sorting-associated protein 25	VPS25	22.0231	19.1495	20.5863	17.5311	18.5491	18.0401	22.1375	22.3044	22.221	2.54619	4.18088	-1.63469	5.8409	18.1372	0.32204		8	8	8	55.7	55.7	55.7	20.747	15.18	7280100	16	3	0	0	0	6	4	3	0	0	0	6	4	3	0	0	0	6	4	19.9	0	0
Q04941	Proteolipid protein 2	PLP2	21.0548	19.4998	20.2773	17.3057	19.3451	18.3254	21.798	21.7856	21.7918	1.95192	3.46642	-1.5145	3.8689	11.0534	0.350019		2	2	2	18.4	18.4	18.4	16.691	22.348	10225000	33	2	1	1	1	2	2	2	1	1	1	2	2	2	1	1	1	2	2	18.4	8.6	8.6
P26885	Peptidyl-prolyl cis-trans isomerase FKBP2	FKBP2	22.1971	17.2402	19.7186	17.6886	18.8544	18.2715	22.1224	21.9568	22.0396	1.44709	3.76809	-2.321	2.72657	13.6241	0.200128		5	5	5	49.3	49.3	49.3	15.649	9.792	5703400	14	3	1	0	1	5	2	3	1	0	1	5	2	3	1	0	1	5	2	19	8.5	0
P04259	Keratin, type II cytoskeletal 6B	KRT6B	22.4639	17.27	19.8669	18.3821	19.521	18.9515	21.0642	20.9018	20.983	0.9154	2.03143	-1.11603	1.88609	4.08808	0.461363		49	4	4	62.9	10.1	10.1	60.066	20.735	17132000	51	25	26	32	20	39	28	2	1	1	1	4	3	2	1	1	1	4	3	38.7	39.7	45.9
P16455	Methylated-DNA--protein-cysteine methyltransferase	MGMT	21.9009	18.0305	19.9657	17.2504	17.6957	17.4731	21.5738	21.9174	21.7456	2.49265	4.27251	-1.77987	5.62811	19.3266	0.291211		6	6	6	43	43	43	21.646	42.936	5978200	24	3	1	2	1	5	3	3	1	2	1	5	3	3	1	2	1	5	3	23.2	4.3	13
Q9NR19	Acetyl-coenzyme A synthetase, cytoplasmic	ACSS2	20.5485	21.3989	20.9737	20.4118	16.7827	18.5973	19.1294	17.8945	18.512	2.37641	-0.08533	2.46174	5.19243	0.942569	5.50881		11	11	11	18.8	18.8	18.8	78.579	14.84	5269500	19	2	5	3	1	0	6	2	5	3	1	0	6	2	5	3	1	0	6	3.1	7	3.9
Q9H9P8	L-2-hydroxyglutarate dehydrogenase, mitochondrial	L2HGDH	21.1939	21.8918	21.5429	21.9573	18.1722	20.0647	18.4643	19.234	18.8492	1.47815	-1.21557	2.69372	2.7859	0.430603	6.46977		6	6	6	13	13	13	50.315	11.571	6625100	23	5	3	2	2	0	0	5	3	2	2	0	0	5	3	2	2	0	0	11.4	5.8	4.3
Q96P63	Serpin B12	SERPINB12	21.4138	20.9292	21.1715	21.7599	19.2272	20.4936	18.4188	18.953	18.6859	0.677915	-1.80768	2.4856	1.59983	0.285649	5.60067		5	5	5	13.6	13.6	13.6	46.276	18.04	11110000	32	3	2	4	1	1	0	3	2	4	1	1	0	3	2	4	1	1	0	9.1	6.2	10.6
P53611	Geranylgeranyl transferase type-2 subunit beta	RABGGTB	22.2146	21.4649	21.8397	20.9304	18.2945	19.6124	18.6293	19.0775	18.8534	2.22729	-0.759	2.98629	4.68254	0.590906	7.92434		4	4	4	13.9	13.9	13.9	36.924	14.371	11121000	14	4	2	2	2	0	1	4	2	2	2	0	1	4	2	2	2	0	1	13.9	6.6	6.6
Q5RKV6	Exosome complex component MTR3	EXOSC6	20.7279	20.9809	20.8544	21.1239	19.0811	20.1025	19.3132	18.7556	19.0344	0.75191	-1.06809	1.82	1.68402	0.476948	3.53082		5	5	5	22.8	22.8	22.8	28.235	17.256	8170000	19	3	3	3	3	3	2	3	3	3	3	3	2	3	3	3	3	3	2	13.2	13.2	13.2
Q9Y6A4	Cilia- and flagella-associated protein 20	CFAP20	20.7564	20.678	20.7172	17.7633	21.9492	19.8563	19.4994	19.1338	19.3166	0.860955	-0.539645	1.4006	1.81624	0.68794	2.64011		6	6	6	30.1	30.1	30.1	22.774	17.207	4617700	21	2	2	1	3	4	2	2	2	1	3	4	2	2	2	1	3	4	2	11.9	10.4	6.2
Q9UNQ0	ATP-binding cassette sub-family G member 2	ABCG2	20.7978	21.4111	21.1044	17.7322	20.0399	18.8861	19.2738	18.0371	18.6555	2.21835	-0.23059	2.44894	4.65361	0.852286	5.46015		7	7	7	9.5	9.5	9.5	72.313	9.0982	6852800	18	3	5	1	2	2	1	3	5	1	2	2	1	3	5	1	2	2	1	4.1	7.2	1.5
Q9NVX2	Notchless protein homolog 1	NLE1	19.7903	20.1094	19.9498	18.8736	21.1673	20.0205	18.3865	18.1222	18.2543	-0.070635	-1.76613	1.69549	0.952219	0.293997	3.23887		4	4	4	9.1	9.1	9.1	53.32	15.284	6837300	11	2	3	1	4	0	1	2	3	1	4	0	1	2	3	1	4	0	1	4.7	7.2	2.5
Q9UKK6;Q9NPJ8	NTF2-related export protein 1;NTF2-related export protein 2	NXT1;NXT2	21.1326	21.1073	21.1199	18.7065	21.2049	19.9557	18.3858	19.0691	18.7274	1.16421	-1.22828	2.39249	2.24111	0.426826	5.25065		2	2	2	10.7	10.7	10.7	15.847	3.0607	2351500	12	2	2	1	2	1	0	2	2	1	2	1	0	2	2	1	2	1	0	10.7	10.7	5
Q96RE7;Q96BF6	Nucleus accumbens-associated protein 1	NACC1	20.3794	19.8808	20.1301	18.9718	20.2571	19.6145	18.6354	16.4574	17.5464	0.515665	-2.06806	2.58372	1.42965	0.238481	5.99483		4	4	4	8.3	8.3	8.3	57.258	22.433	1728400	18	2	3	1	3	0	0	2	3	1	3	0	0	2	3	1	3	0	0	4.4	6.3	2.3
Q96QR8	Transcriptional activator protein Pur-beta	PURB	21.6409	21.071	21.356	18.3126	20.9009	19.6067	17.7355	17.9962	17.8659	1.74923	-1.74088	3.49011	3.36179	0.299187	11.2364		5	5	5	29.5	29.5	29.5	33.24	31.424	12006000	28	2	2	1	2	3	3	2	2	1	2	3	3	2	2	1	2	3	3	7.1	7.1	4.2
Q96GK7;Q6P2I3	Fumarylacetoacetate hydrolase domain-containing protein 2A;Fumarylacetoacetate hydrolase domain-containing protein 2B	FAHD2A;FAHD2B	20.9949	21.0411	21.018	18.8227	20.5875	19.7051	20.4816	18.6533	19.5675	1.31291	-0.137625	1.45053	2.48441	0.909014	2.73308		8	8	8	31.8	31.8	31.8	34.596	30.055	9895200	27	6	3	4	4	4	0	6	3	4	4	4	0	6	3	4	4	4	0	22.9	11.5	16.9
Q8TCT9	Minor histocompatibility antigen H13	HM13	20.8586	21.3678	21.1132	18.0671	20.7333	19.4002	19.5569	18.5283	19.0426	1.71295	-0.357635	2.07058	3.27829	0.780443	4.20056		5	5	5	18.3	18.3	18.3	41.488	26.944	14953000	34	3	3	1	4	2	2	3	3	1	4	2	2	3	3	1	4	2	2	8.2	8.2	3.2
Q04726	Transducin-like enhancer protein 3	TLE3	20.3981	20.0738	20.236	18.154	20.4253	19.2897	18.9425	18.1598	18.5512	0.946295	-0.73849	1.68478	1.92692	0.599366	3.21492		5	5	3	6.9	6.9	4.4	83.416	6.9511	4897300	13	2	4	1	3	0	2	2	4	1	3	0	2	1	2	1	2	0	2	2.6	4.9	1.2
Q00169	Phosphatidylinositol transfer protein alpha isoform	PITPNA	21.5588	20.5444	21.0516	17.8147	19.2936	18.5541	21.1192	17.467	19.2931	2.49747	0.738975	1.75849	5.64694	1.66899	3.38345		11	9	9	48.9	42.6	42.6	31.806	90.432	13995000	17	9	5	1	4	5	0	7	3	0	2	4	0	7	3	0	2	4	0	34.1	20	3.3
P12273	Prolactin-inducible protein	PIP	21.2109	19.5381	20.3745	17.6483	20.2723	18.9603	18.753	17.4903	18.1217	1.41422	-0.838655	2.25287	2.66516	0.559165	4.76632		5	5	5	43.8	43.8	43.8	16.572	13.853	3451400	26	2	2	1	2	2	2	2	2	1	2	2	2	2	2	1	2	2	2	17.8	17.8	7.5
P17050	Alpha-N-acetylgalactosaminidase	NAGA	20.2149	20.3021	20.2585	17.9589	20.7362	19.3475	19.1645	17.7115	18.438	0.91095	-0.909515	1.82046	1.88028	0.532364	3.53195		6	6	6	17.3	17.3	17.3	46.564	20.116	6443000	13	4	2	1	4	0	0	4	2	1	4	0	0	4	2	1	4	0	0	12.2	5.6	2.7
Q9H0N5	Pterin-4-alpha-carbinolamine dehydratase 2	PCBD2	20.8817	18.3392	19.6105	21.3232	20.5197	20.9215	21.5904	17.8349	19.7126	-1.31101	-1.20883	-0.10218	0.403037	0.432618	0.931624		2	2	2	13.8	13.8	13.8	14.365	3.452	5811200	11	2	0	2	2	2	0	2	0	2	2	2	0	2	0	2	2	2	0	13.8	0	13.8
Q969X5	Endoplasmic reticulum-Golgi intermediate compartment protein 1	ERGIC1	21.6516	19.207	20.4293	20.7297	21.4597	21.0947	21.5798	18.9409	20.2603	-0.66545	-0.83441	0.16896	0.630492	0.560812	1.12425		7	7	7	29	29	29	32.592	25.283	18941000	20	4	2	2	3	3	3	4	2	2	3	3	3	4	2	2	3	3	3	14.1	6.2	7.9
Q6FI81	Anamorsin	CIAPIN1	20.8427	18.1578	19.5002	20.195	20.3092	20.2521	20.6059	18.2138	19.4099	-0.751845	-0.842215	0.09037	0.593844	0.557787	1.06464		6	6	6	20.2	20.2	20.2	33.582	13.578	4040600	19	3	1	2	3	4	1	3	1	2	3	4	1	3	1	2	3	4	1	9	3.8	7.4
O75937	DnaJ homolog subfamily C member 8	DNAJC8	20.8233	18.5843	19.7038	21.8779	20.7536	21.3157	20.5211	17.9474	19.2343	-1.61194	-2.08146	0.469515	0.327157	0.236275	1.38464		5	5	5	20.6	20.6	20.6	29.841	8.8824	8912300	16	3	0	3	2	3	0	3	0	3	2	3	0	3	0	3	2	3	0	13.8	0	11.1
O43790;Q14533;P78385;A6NCN2	Keratin, type II cuticular Hb6;Keratin, type II cuticular Hb1;Keratin, type II cuticular Hb3	KRT86;KRT81;KRT83	23.2089	18.5146	20.8617	20.1913	20.1421	20.1667	21.5865	18.4511	20.0188	0.694995	-0.147955	0.84295	1.61888	0.902529	1.79371		15	14	7	33.5	32.1	18.5	53.5	36.244	16093000	37	9	1	3	5	11	0	9	0	2	4	11	0	5	0	2	2	5	0	22.2	1.4	4.9
O43795;Q9UBC5	Unconventional myosin-Ib	MYO1B	20.7999	18.7385	19.7692	20.5217	20.9991	20.7604	21.6062	17.7902	19.6982	-0.99121	-1.06223	0.07102	0.503056	0.478891	1.05046		19	19	19	21.3	21.3	21.3	131.98	119.26	10969000	46	7	1	7	9	14	0	7	1	7	9	14	0	7	1	7	9	14	0	7.3	1.3	6.2
Q9UI10	Translation initiation factor eIF-2B subunit delta	EIF2B4	19.7517	18.3283	19.04	20.1993	19.9504	20.0748	19.0072	19.0292	19.0182	-1.03486	-1.05663	0.02176	0.488062	0.480755	1.0152		8	8	8	22.9	22.9	22.9	57.557	81.997	8462000	25	2	2	4	3	3	3	2	2	4	3	3	3	2	2	4	3	3	3	5.7	6.9	9.8
Q9NP77	RNA polymerase II subunit A C-terminal domain phosphatase SSU72	SSU72	20.1459	17.519	18.8324	20.0676	20.0638	20.0657	18.8465	19.9711	19.4088	-1.23328	-0.656925	-0.576355	0.425349	0.634229	0.670656		5	5	5	28.9	28.9	28.9	22.574	29.884	5495500	18	4	1	3	2	2	2	4	1	3	2	2	2	4	1	3	2	2	2	22.7	5.7	16.5
Q9H5N1	Rab GTPase-binding effector protein 2	RABEP2	20.1795	18.3419	19.2607	21.0026	20.2849	20.6437	19.8211	18.8647	19.3429	-1.38303	-1.30083	-0.0822	0.383413	0.405893	0.944616		8	8	8	14.8	14.8	14.8	63.542	18.953	6544100	20	4	1	5	5	4	0	4	1	5	5	4	0	4	1	5	5	4	0	7	2.1	9
Q99747	Gamma-soluble NSF attachment protein	NAPG	19.9411	18.3271	19.1341	20.9523	20.1089	20.5306	20.0991	18.8045	19.4518	-1.39651	-1.07877	-0.31774	0.379847	0.473432	0.802326		7	7	7	24.7	24.7	24.7	34.746	51.91	6141500	17	3	2	5	2	1	1	3	2	5	2	1	1	3	2	5	2	1	1	11.5	5.4	17.3
Q15654	Thyroid receptor-interacting protein 6	TRIP6	20.1215	18.848	19.4847	19.6331	20.8593	20.2462	19.3801	18.7724	19.0763	-0.76144	-1.16991	0.408475	0.589907	0.444448	1.32728		3	3	3	7.6	7.6	7.6	50.287	22.676	4887000	26	2	2	2	3	0	1	2	2	2	3	0	1	2	2	2	3	0	1	5	4.8	5
Q14691	DNA replication complex GINS protein PSF1	GINS1	20.3737	17.7477	19.0607	20.2751	20.0843	20.1797	19.9035	18.8437	19.3736	-1.119	-0.806085	-0.31291	0.460414	0.571932	0.805016		4	4	4	25.5	25.5	25.5	22.988	37.982	3128600	16	2	1	1	3	3	1	2	1	1	3	3	1	2	1	1	3	3	1	14.8	7.1	7.1
Q07065	Cytoskeleton-associated protein 4	CKAP4	19.5076	18.3592	18.9334	21.322	20.7117	21.0169	20.005	17.862	18.9335	-2.08347	-2.08337	-9.5e-05	0.235946	0.235962	0.999934		10	10	10	22.6	22.6	22.6	66.022	23.644	5423100	19	3	0	7	1	3	2	3	0	7	1	3	2	3	0	7	1	3	2	5.6	0	16.3
P46977	Dolichyl-diphosphooligosaccharide--protein glycosyltransferase subunit STT3A	STT3A	20.2951	18.9502	19.6226	21.321	18.9769	20.1489	19.723	18.7904	19.2567	-0.526295	-0.892215	0.36592	0.694336	0.538786	1.2887		8	8	8	11.2	11.2	11.2	80.529	14.491	5255700	19	5	1	3	6	1	0	5	1	3	6	1	0	5	1	3	6	1	0	6.8	1.7	4.5
M0R2C6;Q9NP81	Serine--tRNA ligase, mitochondrial	SARS2	20.4748	18.2067	19.3408	20.5299	19.9631	20.2465	19.4215	19.2289	19.3252	-0.90576	-0.9213	0.01554	0.533751	0.528033	1.01083		6	6	6	13.6	13.6	13.6	65.649	57.61	7733600	16	5	1	3	4	1	1	5	1	3	4	1	1	5	1	3	4	1	1	12.4	2.7	6.5
O95757	Heat shock 70 kDa protein 4L	HSPA4L	19.6299	18.8281	19.229	20.2446	19.805	20.0248	19.3263	18.9358	19.131	-0.79584	-0.89377	0.09793	0.576008	0.538206	1.07024		18	14	14	29.4	23.1	23.1	94.511	58.121	7595300	28	10	4	10	5	8	6	6	2	7	3	5	3	6	2	7	3	5	3	16.1	6.1	14.5
Q9Y3B7	39S ribosomal protein L11, mitochondrial	MRPL11	21.2953	18.606	19.9507	21.2392	20.9027	21.071	20.0438	19.4024	19.7231	-1.12032	-1.34787	0.227545	0.45999	0.392872	1.17084		6	6	6	37.5	37.5	37.5	20.683	36.375	4822500	19	5	2	4	3	3	0	5	2	4	3	3	0	5	2	4	3	3	0	27.1	12.5	21.4
Q9Y2R9	28S ribosomal protein S7, mitochondrial	MRPS7	20.7048	19.0029	19.8538	20.6506	19.5614	20.106	19.9425	19.8045	19.8735	-0.252175	-0.232525	-0.01965	0.83963	0.851144	0.986472		6	6	6	26.4	26.4	26.4	28.134	15.923	4012600	14	2	1	2	2	4	3	2	1	2	2	4	3	2	1	2	2	4	3	9.5	5	9.5
Q99543	DnaJ homolog subfamily C member 2;DnaJ homolog subfamily C member 2, N-terminally processed	DNAJC2	19.8199	19.2565	19.5382	21.8669	19.5897	20.7283	20.3073	19.6654	19.9863	-1.19016	-0.74198	-0.44818	0.438254	0.597918	0.732967		12	12	12	24.2	24.2	24.2	71.996	31.34	10942000	30	5	1	7	2	6	4	5	1	7	2	6	4	5	1	7	2	6	4	10.1	1.9	13.4
Q32MZ4;Q9Y608	Leucine-rich repeat flightless-interacting protein 1	LRRFIP1	20.25	18.2763	19.2632	21.7442	20.5115	21.1279	20.6236	20.0144	20.319	-1.86471	-0.808895	-1.05581	0.274579	0.570819	0.481027		8	8	8	13.4	13.4	13.4	89.252	131.89	10902000	52	4	1	5	4	7	3	4	1	5	4	7	3	4	1	5	4	7	3	7.7	1.4	8.2
Q16740	ATP-dependent Clp protease proteolytic subunit, mitochondrial	CLPP	20.4932	19.371	19.9321	21.1272	20.708	20.9176	20.1623	20.0794	20.1208	-0.985545	-0.79679	-0.188755	0.505035	0.575629	0.877363		7	7	7	27.4	27.4	27.4	30.18	32.829	5309200	20	5	1	3	3	2	2	5	1	3	3	2	2	5	1	3	3	2	2	19.1	5.8	17.7
Q16204	Coiled-coil domain-containing protein 6	CCDC6	19.8983	18.807	19.3526	21.3858	20.3703	20.878	20.8457	20.1319	20.4888	-1.52542	-0.389235	-1.13619	0.347377	0.763534	0.454959		12	12	12	30.2	30.2	30.2	53.29	79.473	12356000	38	3	1	9	3	4	4	3	1	9	3	4	4	3	1	9	3	4	4	10.5	1.9	22.2
O95749	Geranylgeranyl pyrophosphate synthase	GGPS1	20.6016	18.2338	19.4177	20.495	21.0548	20.7749	20.7745	19.2646	20.0195	-1.35722	-0.755355	-0.60186	0.390335	0.592401	0.658904		7	7	7	21.3	21.3	21.3	34.87	29.341	8358600	19	3	1	2	6	4	0	3	1	2	6	4	0	3	1	2	6	4	0	10.3	4	6.7
O15173	Membrane-associated progesterone receptor component 2	PGRMC2	20.0399	18.1071	19.0735	20.7081	20.3894	20.5488	20.6133	19.7714	20.1924	-1.47527	-0.356405	-1.11886	0.359667	0.781109	0.460458		5	4	4	22.9	18.8	18.8	23.818	14.747	6443200	27	5	2	3	3	4	5	4	1	2	2	3	4	4	1	2	2	3	4	22.9	7.6	16.1
O43719	HIV Tat-specific factor 1	HTATSF1	20.4468	19.2593	19.853	21.0491	20.8173	20.9332	19.7068	20.2445	19.9756	-1.08015	-0.95754	-0.12261	0.47298	0.514934	0.918524		6	6	6	9.5	9.5	9.5	85.852	144.75	5981100	26	3	1	3	3	3	3	3	1	3	3	3	3	3	1	3	3	3	3	5.6	1.1	5.6
Q9NS69	Mitochondrial import receptor subunit TOM22 homolog	TOMM22	19.0096	17.5556	18.2826	20.3259	20.7685	20.5472	18.8615	18.5965	18.729	-2.26458	-1.81821	-0.446375	0.20811	0.283573	0.733885		1	1	1	8.5	8.5	8.5	15.521	24.761	2339200	20	1	1	1	1	0	0	1	1	1	1	0	0	1	1	1	1	0	0	8.5	8.5	8.5
Q8WXH0	Nesprin-2	SYNE2	19.2761	18.0465	18.6613	21.6203	21.1799	21.4001	19.9214	18.6817	19.3015	-2.73876	-2.09853	-0.64023	0.149814	0.233497	0.641611		7	7	7	1.2	1.2	1.2	796.43	11.254	9648000	13	0	1	2	2	4	1	0	1	2	2	4	1	0	1	2	2	4	1	0	0.2	0.4
Q8TCS8	Polyribonucleotide nucleotidyltransferase 1, mitochondrial	PNPT1	20.8296	17.6905	19.26	21.1145	20.8558	20.9851	18.1651	19.1614	18.6632	-1.72508	-2.32191	0.59683	0.302481	0.200002	1.51239		9	9	9	14.7	14.7	14.7	85.95	36.645	9946900	16	6	1	7	2	1	0	6	1	7	2	1	0	6	1	7	2	1	0	8.8	1.8	10.9
Q7L0Y3	Mitochondrial ribonuclease P protein 1	TRMT10C	19.4443	19.0417	19.243	22.5576	21.5472	22.0524	19.4685	18.0867	18.7776	-2.80939	-3.27481	0.465425	0.142656	0.10332	1.38072	+	13	13	13	33.3	33.3	33.3	47.346	30.993	21065000	29	3	2	11	9	1	1	3	2	11	9	1	1	3	2	11	9	1	1	11.9	8.4	26.8
Q15833	Syntaxin-binding protein 2	STXBP2	20.3179	18.6399	19.4789	21.6521	21.057	21.3546	18.205	19.567	18.886	-1.87564	-2.46855	0.59291	0.272505	0.180672	1.50829		13	13	13	28.5	28.5	28.5	66.452	223.08	11151000	30	5	0	5	6	5	5	5	0	5	6	5	5	5	0	5	6	5	5	10.5	0	10.1
P82650	28S ribosomal protein S22, mitochondrial	MRPS22	19.6228	19.1917	19.4073	21.6115	21.713	21.6623	19.677	19.7487	19.7128	-2.25501	-1.94944	-0.305575	0.209495	0.258918	0.80912	+	7	7	7	20.8	20.8	20.8	41.28	51.364	11081000	22	2	1	5	6	4	2	2	1	5	6	4	2	2	1	5	6	4	2	6.4	3.3	15
P36969	Phospholipid hydroperoxide glutathione peroxidase, mitochondrial	GPX4	19.9793	17.4434	18.7113	20.0828	23.0479	21.5654	19.4062	19.5935	19.4999	-2.854	-2.06549	-0.788515	0.138312	0.238906	0.57894		4	4	4	24.9	24.9	24.9	22.174	8.1891	5817400	19	3	1	2	4	1	1	3	1	2	4	1	1	3	1	2	4	1	1	19.3	3.6	11.7
P28331	NADH-ubiquinone oxidoreductase 75 kDa subunit, mitochondrial	NDUFS1	19.5929	17.8159	18.7044	21.8696	21.1055	21.4875	19.4846	19.0568	19.2707	-2.78315	-2.21683	-0.566325	0.145274	0.215114	0.675335		12	12	12	22.8	22.8	22.8	79.467	107.48	10596000	23	4	0	6	7	1	3	4	0	6	7	1	3	4	0	6	7	1	3	8.1	0	9.8
O14562	Ubiquitin domain-containing protein UBFD1	UBFD1	19.6349	18.0056	18.8202	20.6556	21.0302	20.8429	18.683	18.9088	18.7959	-2.02266	-2.047	0.02435	0.246105	0.241986	1.01702		7	7	7	29.8	29.8	29.8	33.382	35.654	10589000	24	2	1	4	2	2	4	2	1	4	2	2	4	2	1	4	2	2	4	7.4	3.9	21.4
P26358	DNA (cytosine-5)-methyltransferase 1	DNMT1	19.2965	17.6927	18.4946	20.9062	20.5293	20.7177	19.2865	19.9569	19.6217	-2.22312	-1.09603	-1.12709	0.214178	0.467802	0.457838		13	13	13	10	10	10	183.16	30.624	7169200	30	2	1	6	6	3	7	2	1	6	6	3	7	2	1	6	6	3	7	1.4	0.7	3.8
Q9UHQ9	NADH-cytochrome b5 reductase 1	CYB5R1	20.3578	21.4198	20.8888	20.9263	21.3497	21.138	18.4445	19.0753	18.7599	-0.24919	-2.37809	2.1289	0.841369	0.192363	4.37385		4	4	4	12.1	12.1	12.1	34.094	8.2152	7834200	16	3	3	3	3	0	0	3	3	3	3	0	0	3	3	3	3	0	0	9.5	8.5	9.5
Q9UHL4	Dipeptidyl peptidase 2	DPP7	20.8825	20.6368	20.7596	20.2667	20.4811	20.3739	18.3353	19.0756	18.7054	0.38574	-1.66845	2.05419	1.30653	0.314591	4.1531		5	5	5	13.6	13.6	13.6	54.341	13.127	10192000	18	3	2	4	3	0	0	3	2	4	3	0	0	3	2	4	3	0	0	8.9	4.9	10.8
Q9NVA2;Q14141	Septin-11	Sep-11	21.5885	21.5798	21.5842	21.3397	20.8276	21.0836	18.3428	18.3352	18.339	0.500535	-2.74464	3.24517	1.41474	0.149204	9.48189		8	5	5	24.7	16.8	16.8	49.398	112.81	15289000	16	4	5	3	6	0	0	2	4	3	4	0	0	2	4	3	4	0	0	13.1	15.4	10
Q9NPF4	Probable tRNA N6-adenosine threonylcarbamoyltransferase	OSGEP	21.4499	21.0697	21.2598	21.1548	20.6895	20.9221	18.4556	18.6611	18.5584	0.337685	-2.36377	2.70145	1.26373	0.194283	6.50458		5	5	5	19.4	19.4	19.4	36.426	31.634	9414700	16	2	4	2	4	1	0	2	4	2	4	1	0	2	4	2	4	1	0	9.9	15.8	8.4
Q96LA8	Protein arginine N-methyltransferase 6	PRMT6	21.0435	21.2151	21.1293	20.5114	20.5659	20.5387	18.6717	17.5281	18.0999	0.59062	-2.43879	3.02941	1.50589	0.184438	8.16476	+	5	5	5	13.9	13.9	13.9	41.937	87.175	12301000	18	2	3	5	3	1	1	2	3	5	3	1	1	2	3	5	3	1	1	9.3	11.5	13.9
Q8NBX0	Saccharopine dehydrogenase-like oxidoreductase	SCCPDH	20.796	20.2894	20.5427	20.2832	20.259	20.2711	18.0319	18.2951	18.1635	0.271575	-2.10758	2.37916	1.20712	0.232036	5.20232		5	5	5	14.5	14.5	14.5	47.151	10.45	11559000	17	4	2	4	3	0	0	4	2	4	3	0	0	4	2	4	3	0	0	11.4	4.9	11.4
Q8NBJ7	Sulfatase-modifying factor 2	SUMF2	20.8212	21.0171	20.9191	21.8318	21.598	21.7149	18.5185	18.6958	18.6071	-0.795745	-3.10774	2.312	0.576046	0.116005	4.96569	+	8	8	8	28.9	28.9	28.9	33.843	38.946	16408000	42	5	4	6	6	2	1	5	4	6	6	2	1	5	4	6	6	2	1	19.9	15.9	23.3
Q86X76	Nitrilase homolog 1	NIT1	20.5628	20.9303	20.7465	19.9608	20.8095	20.3852	18.403	18.1365	18.2697	0.361385	-2.11542	2.4768	1.28466	0.230779	5.56661		5	5	5	16.5	16.5	16.5	35.896	14.929	7120500	15	3	3	3	3	1	0	3	3	3	3	1	0	3	3	3	3	1	0	9.2	8.3	9.2
Q32P41	tRNA (guanine(37)-N1)-methyltransferase	TRMT5	20.1483	21.1258	20.637	21.4467	21.0922	21.2695	17.0192	18.7921	17.9057	-0.63244	-3.36383	2.73139	0.645084	0.0971374	6.64095		8	8	8	16.3	16.3	16.3	58.246	14.827	11743000	25	4	4	4	4	1	1	4	4	4	4	1	1	4	4	4	4	1	1	8.8	8.8	8.8
P78344	Eukaryotic translation initiation factor 4 gamma 2	EIF4G2	21.3299	21.3348	21.3323	20.6667	20.8665	20.7666	18.9024	19.0412	18.9718	0.5657	-1.79482	2.36052	1.48011	0.288208	5.13555	+	13	13	13	16	16	16	102.36	69.067	15408000	43	10	5	5	5	3	5	10	5	5	5	3	5	10	5	5	5	3	5	12.1	6.3	5.8
P61916	Epididymal secretory protein E1	NPC2	20.9881	21.0024	20.9953	21.2956	20.3987	20.8472	18.2512	18.3429	18.297	0.14807	-2.55015	2.69822	1.10809	0.170737	6.49001		2	2	2	16.6	16.6	16.6	16.57	12.743	3694400	17	2	2	2	2	0	0	2	2	2	2	0	0	2	2	2	2	0	0	16.6	16.6	16.6
P55795	Heterogeneous nuclear ribonucleoprotein H2	HNRNPH2	20.8411	19.8831	20.3621	20.7707	20.4325	20.6016	18.1193	18.2325	18.1759	-0.23952	-2.42568	2.18616	0.847027	0.186121	4.55094		9	5	5	28.3	15.8	15.8	49.263	22.861	5534900	20	5	3	5	5	4	7	2	2	2	3	1	3	2	2	2	3	1	3	14.9	8.7	14.9
P55145	Mesencephalic astrocyte-derived neurotrophic factor	MANF	21.195	20.9558	21.0754	21.0006	21.5385	21.2696	17.7249	18.8401	18.2825	-0.194135	-2.98708	2.79294	0.874097	0.126125	6.93041		7	7	7	42.3	42.3	42.3	20.7	30.372	4430800	24	3	2	2	4	4	2	3	2	2	4	4	2	3	2	2	4	4	2	17.6	9.9	12.1
P31146	Coronin-1A	CORO1A	22.0547	20.83	21.4423	21.6098	21.7388	21.6743	18.392	19.1312	18.7616	-0.231955	-2.91268	2.68073	0.85148	0.132799	6.41178		8	8	8	23	23	23	51.026	63.114	19271000	32	3	4	3	5	1	2	3	4	3	5	1	2	3	4	3	5	1	2	7.8	9.5	7.8
P12830	Cadherin-1;E-Cad/CTF1;E-Cad/CTF2;E-Cad/CTF3	CDH1	20.7025	20.8184	20.7605	19.9531	20.1177	20.0354	17.8336	18.2984	18.066	0.725085	-1.96935	2.69443	1.653	0.255369	6.47298	+	8	8	8	13.3	13.3	13.3	97.455	56.807	5791600	25	4	4	4	2	2	0	4	4	4	2	2	0	4	4	4	2	2	0	6.5	5.9	5.9
P05026	Sodium/potassium-transporting ATPase subunit beta-1	ATP1B1	21.1006	21.1004	21.1005	21.8866	22.1745	22.0306	17.9664	18.5704	18.2684	-0.93008	-3.76219	2.83211	0.524829	0.0737003	7.12112	+	6	6	6	25.1	25.1	25.1	35.061	21.065	20390000	33	3	4	4	5	0	1	3	4	4	5	0	1	3	4	4	5	0	1	13.5	16.2	16.2
O75569	Interferon-inducible double-stranded RNA-dependent protein kinase activator A	PRKRA	20.7837	20.8545	20.8191	21.859	21.8439	21.8514	18.4557	18.9018	18.6788	-1.03229	-3.17264	2.14035	0.488933	0.110902	4.40871	+	7	7	7	32.3	32.3	32.3	34.404	40.793	13794000	25	4	2	4	3	4	0	4	2	4	3	4	0	4	2	4	3	4	0	15.7	8	15.7
O95848	Uridine diphosphate glucose pyrophosphatase	NUDT14	21.801	21.6449	21.7229	20.6789	20.8879	20.7834	16.78	18.3751	17.5775	0.939505	-3.20587	4.14538	1.91787	0.108377	17.6963	+	5	5	5	31.1	31.1	31.1	24.118	42.72	12530000	21	3	2	4	2	2	0	3	2	4	2	2	0	3	2	4	2	2	0	18	12.2	24.8
Q9Y676	28S ribosomal protein S18b, mitochondrial	MRPS18B	20.9936	20.0896	20.5416	21.7919	21.1872	21.4896	20.0582	18.3012	19.1797	-0.947935	-2.30992	1.36198	0.518374	0.201672	2.57038		4	4	4	22.9	22.9	22.9	29.395	58.213	11789000	26	4	2	4	3	2	1	4	2	4	3	2	1	4	2	4	3	2	1	22.9	7.8	22.9
Q13835	Plakophilin-1	PKP1	21.1342	20.6567	20.8955	21.9378	20.5822	21.26	19.2753	19.1513	19.2133	-0.36455	-2.04673	1.68219	0.776711	0.242031	3.20914		6	6	6	9.1	9.1	9.1	82.86	62.925	9052300	30	2	2	6	3	0	0	2	2	6	3	0	0	2	2	6	3	0	0	3.5	3.5	9.1
Q13510	Acid ceramidase;Acid ceramidase subunit alpha;Acid ceramidase subunit beta	ASAH1	21.3269	21.6741	21.5005	21.2029	21.2569	21.2299	19.4774	18.5553	19.0164	0.270555	-2.21356	2.48412	1.20627	0.215601	5.59493		4	4	4	9.6	9.6	9.6	44.659	17.44	12512000	15	4	3	3	2	0	0	4	3	3	2	0	0	4	3	3	2	0	0	9.6	7.6	7.1
Q08722	Leukocyte surface antigen CD47	CD47	21.4802	21.1925	21.3363	22.7501	21.3644	22.0572	19.5744	18.0083	18.7913	-0.72089	-3.26593	2.54504	0.606723	0.103958	5.83622		3	3	3	8.7	8.7	8.7	35.213	3.9163	16003000	16	3	2	3	3	0	0	3	2	3	3	0	0	3	2	3	3	0	0	8.7	5.9	8.7
O43665	Regulator of G-protein signaling 10	RGS10	20.5407	20.8225	20.6816	21.1981	20.694	20.946	19.396	18.7177	19.0569	-0.26446	-1.88918	1.62472	0.83251	0.26996	3.08383		3	3	3	26	26	26	20.236	23.968	3379400	25	2	2	2	2	3	0	2	2	2	2	3	0	2	2	2	2	3	0	16.2	16.2	16.2
P51610;Q9Y5Z7	Host cell factor 1;HCF N-terminal chain 1;HCF N-terminal chain 2;HCF N-terminal chain 3;HCF N-terminal chain 4;HCF N-terminal chain 5;HCF N-terminal chain 6;HCF C-terminal chain 1;HCF C-terminal chain 2;HCF C-terminal chain 3;HCF C-terminal chain 4;HCF C-terminal chain 5;HCF C-terminal chain 6	HCFC1	21.4463	19.9314	20.6888	21.0667	20.6561	20.8614	19.8064	19.1874	19.4969	-0.172575	-1.36452	1.19194	0.887258	0.388365	2.2846		14	14	14	10.4	10.4	10.4	208.73	42.342	14063000	40	9	3	9	6	4	2	9	3	9	6	4	2	9	3	9	6	4	2	5.9	1.6	5.1
Q9UJU6	Drebrin-like protein	DBNL	20.7984	21.052	20.9252	21.1501	21.0533	21.1017	20.462	18.0007	19.2314	-0.17653	-1.87034	1.69381	0.884829	0.27351	3.23509		9	9	9	28.1	28.1	28.1	48.207	55.141	6355600	37	5	2	7	5	5	1	5	2	7	5	5	1	5	2	7	5	5	1	14.7	5.6	22.1
Q9HBL8	NmrA-like family domain-containing protein 1	NMRAL1	20.9997	21.2353	21.1175	20.4444	21.1983	20.8213	20.4233	17.3187	18.871	0.29617	-1.95033	2.2465	1.22788	0.258757	4.7453		8	8	8	34.1	34.1	34.1	33.344	45.404	10177000	18	3	3	2	3	7	0	3	3	2	3	7	0	3	3	2	3	7	0	13.7	9.4	6.4
Q9H2C0	Gigaxonin	GAN	20.6786	21.2533	20.9659	20.1207	19.4545	19.7876	19.317	17.8082	18.5626	1.17833	-1.22505	2.40338	2.26315	0.427783	5.29043		10	10	10	19.9	19.9	19.9	67.638	25.987	9550900	27	7	4	2	4	0	1	7	4	2	4	0	1	7	4	2	4	0	1	16.4	8.5	4.2
Q8IZP0;Q9NYB9	Abl interactor 1	ABI1	20.9112	21.1307	21.0209	19.5504	21.0673	20.3089	19.6971	18.3104	19.0038	0.712065	-1.3051	2.01716	1.63815	0.404693	4.04788		3	3	3	6.9	6.9	6.9	55.08	29.461	3628700	11	3	3	1	3	0	0	3	3	1	3	0	0	3	3	1	3	0	0	6.9	6.9	3
Q7L5D6	Golgi to ER traffic protein 4 homolog	GET4	21.2645	21.2325	21.2485	20.7651	20.9385	20.8518	21.1285	17.6013	19.3649	0.396645	-1.48698	1.88362	1.31644	0.356759	3.69001	+	7	7	7	23.9	23.9	23.9	36.504	65.233	13458000	45	4	4	3	4	5	2	4	4	3	4	5	2	4	4	3	4	5	2	15.3	14.1	10.1
Q15155	Nodal modulator 1	NOMO1	19.9875	20.2605	20.124	20.761	20.2031	20.4821	20.3388	18.0074	19.1731	-0.35807	-1.30899	0.95092	0.780208	0.403603	1.9331		11	11	1	11.5	11.5	1.4	134.32	22.822	7953500	36	3	3	7	4	7	0	3	3	7	4	7	0	0	0	1	0	1	0	2.9	2.9	7.1
Q13868	Exosome complex component RRP4	EXOSC2	20.6065	20.6095	20.608	19.2618	19.7837	19.5228	20.4408	17.7626	19.1017	1.08522	-0.421045	1.50626	2.12169	0.746883	2.84073		3	3	3	11.3	11.3	11.3	32.789	13.756	2183000	11	3	2	0	1	3	1	3	2	0	1	3	1	3	2	0	1	3	1	11.3	7.8	0
P61011	Signal recognition particle 54 kDa protein	SRP54	20.6731	20.386	20.5295	20.7227	20.6941	20.7084	18.7138	17.1429	17.9283	-0.17889	-2.78009	2.6012	0.883382	0.145583	6.06789		10	10	10	22.4	22.4	22.4	55.704	43.609	11290000	30	3	5	5	3	1	4	3	5	5	3	1	4	3	5	5	3	1	4	6.7	10.7	11.1
P43304	Glycerol-3-phosphate dehydrogenase, mitochondrial	GPD2	20.2247	20.2168	20.2207	20.6514	20.7769	20.7142	20.8015	17.8082	19.3049	-0.49342	-1.40929	0.915865	0.710339	0.376498	1.8867	+	14	14	14	24.2	24.2	24.2	80.852	34.897	15511000	31	7	5	6	7	3	1	7	5	6	7	3	1	7	5	6	7	3	1	12.4	9.2	9.5
O60524	Nuclear export mediator factor NEMF	NEMF	20.5794	20.7526	20.666	20.5127	21.0928	20.8027	20.0939	17.683	18.8884	-0.136735	-1.9143	1.77757	0.909575	0.2653	3.42848		7	7	7	6.9	6.9	6.9	122.95	33.927	10250000	31	3	5	4	4	6	2	3	5	4	4	6	2	3	5	4	4	6	2	3.2	5	4.1
P04066	Tissue alpha-L-fucosidase	FUCA1	21.6324	20.6475	21.14	20.5167	19.9248	20.2208	19.2593	17.6018	18.4306	0.91918	-1.79021	2.7094	1.89104	0.289129	6.54047		5	5	5	13.3	13.3	13.3	53.688	17.821	11105000	13	5	2	2	1	0	0	5	2	2	1	0	0	5	2	2	1	0	0	13.3	4.5	4.7
Q8WU90	Zinc finger CCCH domain-containing protein 15	ZC3H15	19.264	20.3958	19.8299	20.5419	20.5253	20.5336	18.5314	19.4237	18.9776	-0.7037	-1.55606	0.852355	0.613996	0.34008	1.80545		5	5	5	17.4	17.4	17.4	48.602	45.862	10738000	26	2	2	2	2	3	1	2	2	2	2	3	1	2	2	2	2	3	1	6.1	8.2	8.2
Q8TCJ2	Dolichyl-diphosphooligosaccharide--protein glycosyltransferase subunit STT3B	STT3B	19.1042	20.1417	19.6229	19.8367	19.5942	19.7154	18.4201	19.3583	18.8892	-0.0925	-0.82625	0.73375	0.937896	0.563993	1.66296		4	4	4	5.1	5.1	5.1	93.673	7.1531	3613600	13	2	4	3	3	0	0	2	4	3	3	0	0	2	4	3	3	0	0	2.8	5.1	4
P53367	Arfaptin-1	ARFIP1	17.8181	20.5068	19.1624	20.9041	20.3937	20.6489	18.6677	20.31	19.4888	-1.4865	-1.16007	-0.32643	0.356877	0.447491	0.797508		7	7	7	24.7	24.7	24.7	41.738	19.42	6764800	20	2	4	3	2	2	4	2	4	3	2	2	4	2	4	3	2	2	4	6.2	11	9.1
P49840;M0QYV0	Glycogen synthase kinase-3 alpha	GSK3A	18.9231	20.8311	19.8771	19.9276	20.0933	20.0104	18.6252	19.5309	19.078	-0.133345	-0.932375	0.79903	0.911715	0.523995	1.73993		4	4	4	10.4	10.4	10.4	50.98	9.6132	8033100	16	2	3	2	2	0	2	2	3	2	2	0	2	2	3	2	2	0	2	6.4	6.8	5
P41743	Protein kinase C iota type	PRKCI	19.5319	21.0327	20.2823	19.333	19.7588	19.5459	18.9039	21.0834	19.9936	0.73644	0.44776	0.28868	1.66606	1.36392	1.22152		9	9	9	22	22	22	68.262	114.41	6394700	27	5	4	0	1	2	4	5	4	0	1	2	4	5	4	0	1	2	4	12.4	8.6	0
P22830	Ferrochelatase, mitochondrial	FECH	19.4447	21.2482	20.3464	20.5692	19.4823	20.0258	19.1114	19.0535	19.0824	0.320685	-0.94332	1.264	1.24892	0.520035	2.40162		6	6	6	17.7	17.7	17.7	47.862	28.184	7540900	18	5	2	3	1	1	1	5	2	3	1	1	1	5	2	3	1	1	1	15.4	5.2	8.5
G3V3G9;Q5TAQ9;A6NGE4;P0C7V8	DDB1- and CUL4-associated factor 8	DCAF8	17.821	20.8741	19.3475	19.8976	19.6079	19.7527	17.7306	20.8436	19.2871	-0.405195	-0.465665	0.06047	0.755134	0.724137	1.04281		7	7	7	10.8	10.8	10.8	84.752	19.793	5941400	15	3	3	3	3	1	0	3	3	3	3	1	0	3	3	3	3	1	0	5.5	4.3	3.7
O00592	Podocalyxin	PODXL	19.2343	20.2218	19.728	20.2795	19.8106	20.045	18.4393	19.7013	19.0703	-0.316995	-0.97474	0.657745	0.80274	0.508832	1.57761		3	3	3	6.8	6.8	6.8	58.635	87.874	5420200	18	2	3	3	3	3	1	2	3	3	3	3	1	2	3	3	3	3	1	4.5	6.8	6.8
Q9Y4C2	TRPM8 channel-associated factor 1	TCAF1	19.7088	19.9825	19.8456	19.7615	20.0731	19.9173	19.8602	19.9711	19.9156	-0.071715	-0.001695	-0.07002	0.951506	0.998826	0.952625		11	11	11	15.2	15.2	15.2	102.12	22.89	6519600	33	5	4	3	5	7	6	5	4	3	5	7	6	5	4	3	5	7	6	5.6	4.2	3.4
Q9Y263	Phospholipase A-2-activating protein	PLAA	20.573	20.2067	20.3899	20.1788	20.3144	20.2466	19.4987	20.7841	20.1414	0.143275	-0.10519	0.248465	1.10441	0.929682	1.18794		17	17	17	29.8	29.8	29.8	87.156	71.052	7682000	34	7	6	2	4	4	7	7	6	2	4	4	7	7	6	2	4	4	7	12.8	9.2	5
Q9UK41	Vacuolar protein sorting-associated protein 28 homolog	VPS28	20.0536	19.298	19.6758	20.1351	19.7668	19.9509	19.7398	20.2575	19.9987	-0.27513	0.04774	-0.32287	0.826376	1.03364	0.799478		6	6	6	26.7	26.7	26.7	25.425	30.756	2475000	13	2	1	3	3	4	2	2	1	3	3	4	2	2	1	3	3	4	2	14.9	6.3	14.9
Q9H2K8	Serine/threonine-protein kinase TAO3	TAOK3	19.8272	20.2499	20.0386	19.3939	20.0902	19.742	18.5903	20.0963	19.3433	0.296555	-0.39872	0.695275	1.22821	0.758531	1.61919		6	6	5	7.1	7.1	5.7	105.4	19.75	6882900	18	3	4	3	2	3	1	3	4	3	2	3	1	3	4	2	1	2	1	3.5	4.6	3.8
Q92506	Estradiol 17-beta-dehydrogenase 8	HSD17B8	19.5237	19.762	19.6429	19.8101	19.8837	19.8469	19.0898	19.3903	19.2401	-0.204025	-0.60683	0.402805	0.868125	0.656638	1.32208		4	4	4	19.9	19.9	19.9	26.973	25.992	2955400	10	1	2	2	3	1	0	1	2	2	3	1	0	1	2	2	3	1	0	5.7	9.6	9.6
Q8NF37	Lysophosphatidylcholine acyltransferase 1	LPCAT1	18.4585	19.5526	19.0056	20.5363	20.5153	20.5258	19.0735	20.8583	19.9659	-1.52021	-0.559915	-0.960295	0.348635	0.678342	0.513952		5	5	5	13.1	13.1	13.1	59.151	57.829	8623900	19	3	2	3	3	2	4	3	2	3	3	2	4	3	2	3	3	2	4	6.9	4.1	6
Q86Y56	Dynein assembly factor 5, axonemal	DNAAF5	19.3035	19.5636	19.4336	19.4809	20.4087	19.9448	19.348	20.2325	19.7902	-0.511235	-0.154565	-0.35667	0.701622	0.898403	0.780965		13	13	13	21.3	21.3	21.3	93.52	58.02	6647400	35	6	2	3	4	7	10	6	2	3	4	7	10	6	2	3	4	7	10	9.5	3.7	4.1
Q6VY07	Phosphofurin acidic cluster sorting protein 1	PACS1	19.5994	19.8845	19.742	19.8215	19.0903	19.4559	19.0515	19.6367	19.3441	0.28608	-0.11174	0.39782	1.21932	0.925471	1.31752		9	9	9	11.5	11.5	11.5	104.9	13.471	3609400	17	5	3	1	2	5	0	5	3	1	2	5	0	5	3	1	2	5	0	6.3	4.2	0.9
Q05086	Ubiquitin-protein ligase E3A	UBE3A	18.7811	19.5476	19.1644	20.0937	19.5435	19.8186	18.942	19.8639	19.403	-0.654195	-0.415585	-0.23861	0.63543	0.749715	0.847562		12	12	12	18.2	18.2	18.2	100.69	43.336	5784700	32	3	2	4	3	5	5	3	2	4	3	5	5	3	2	4	3	5	5	4.3	3.1	5.4
P30419	Glycylpeptide N-tetradecanoyltransferase 1	NMT1	19.6235	19.3264	19.4749	19.8389	19.6301	19.7345	18.4309	20.6995	19.5652	-0.259595	-0.16931	-0.090285	0.835322	0.889268	0.939337		4	4	4	10.7	10.7	10.7	56.806	23.458	6155200	22	2	2	2	3	2	2	2	2	2	3	2	2	2	2	2	3	2	2	5	5	5
P29350	Tyrosine-protein phosphatase non-receptor type 6	PTPN6	19.5844	20.1103	19.8473	20.0326	19.6804	19.8565	20.0502	19.7833	19.9168	-0.009125	0.06028	-0.069405	0.993695	1.04267	0.953031		10	10	10	22.7	22.7	22.7	67.56	36.331	6247900	30	5	3	4	2	7	4	5	3	4	2	7	4	5	3	4	2	7	4	9.9	6.1	8.4
O94832	Unconventional myosin-Id	MYO1D	20.0098	19.9813	19.9956	19.9533	19.6651	19.8092	19.2443	19.6234	19.4338	0.18634	-0.37538	0.56172	1.13787	0.770902	1.47603		11	11	11	12.5	12.5	12.5	116.2	21.613	6319300	25	3	3	4	4	3	4	3	3	4	4	3	4	3	3	4	4	3	4	3.2	2.7	4.5
O75674	TOM1-like protein 1	TOM1L1	19.7231	19.582	19.6526	20.1248	20.0655	20.0952	19.71	19.7157	19.7128	-0.442585	-0.38231	-0.060275	0.735815	0.767208	0.959081	+	6	6	6	18.3	18.3	18.3	52.988	16.363	5393100	16	3	0	2	5	2	3	3	0	2	5	2	3	3	0	2	5	2	3	9.9	0	4.8
O00418	Eukaryotic elongation factor 2 kinase	EEF2K	20.6895	19.8925	20.291	20.4282	19.5064	19.9673	19.059	19.9396	19.4993	0.32366	-0.46801	0.79167	1.2515	0.722961	1.73108		7	7	7	11.4	11.4	11.4	82.143	25.43	7629000	22	5	3	2	1	3	3	5	3	2	1	3	3	5	3	2	1	3	3	8.7	5	2.8
O43493	Trans-Golgi network integral membrane protein 2	TGOLN2	19.813	19.4159	19.6144	20.3977	20.0875	20.2426	19.4011	19.6773	19.5392	-0.628145	-0.70335	0.075205	0.647008	0.614144	1.05351		6	6	6	16.5	16.5	16.5	51.112	52.464	6868900	31	3	2	3	3	4	3	3	2	3	3	4	3	3	2	3	3	4	3	8.1	5.2	8.8
Q9Y6N5;H3BNX3	Sulfide:quinone oxidoreductase, mitochondrial	SQRDL	19.379	19.8531	19.6161	20.5269	19.9982	20.2626	16.9641	18.6911	17.8276	-0.6465	-2.43496	1.78846	0.638828	0.184929	3.45446		7	7	7	19.1	19.1	19.1	49.96	29.704	6669800	15	4	2	2	4	0	0	4	2	2	4	0	0	4	2	2	4	0	0	12.9	6.2	5.8
Q9Y5B9	FACT complex subunit SPT16	SUPT16H	19.5976	19.8334	19.7155	20.689	20.8371	20.763	19.2836	19.0605	19.1721	-1.04754	-1.59099	0.543445	0.483791	0.331944	1.45745	+	9	9	9	11.1	11.1	11.1	119.91	28.509	7105300	26	4	3	5	4	5	0	4	3	5	4	5	0	4	3	5	4	5	0	4.8	3.6	5.3
Q9UL15	BAG family molecular chaperone regulator 5	BAG5	20.0212	19.8138	19.9175	20.9046	20.6123	20.7584	18.6873	17.9638	18.3256	-0.84093	-2.43286	1.59193	0.558284	0.185198	3.01452	+	8	8	8	24.4	24.4	24.4	51.199	80.993	8498400	19	3	3	3	3	2	3	3	3	3	3	2	3	3	3	3	3	2	3	10.5	7.8	8.3
Q9UBP6	tRNA (guanine-N(7)-)-methyltransferase	METTL1	20.5317	19.3056	19.9187	20.4574	20.2832	20.3703	18.1024	17.5578	17.8301	-0.451655	-2.54021	2.08855	0.731204	0.171918	4.2532		4	4	4	23.2	23.2	23.2	31.471	9.9873	4421500	16	2	2	2	2	2	0	2	2	2	2	2	0	2	2	2	2	2	0	8	8	8
Q9H3H3	UPF0696 protein C11orf68	C11orf68	19.6	18.8784	19.2392	20.4651	20.2689	20.367	18.2451	19.1771	18.7111	-1.1278	-1.65591	0.52811	0.457613	0.317338	1.44204		4	4	4	17.9	17.9	17.9	27.354	9.1011	4666100	11	3	1	2	3	1	0	3	1	2	3	1	0	3	1	2	3	1	0	14.7	5.2	9.6
Q9BQ67	Glutamate-rich WD repeat-containing protein 1	GRWD1	18.9806	19.4863	19.2335	20.114	20.3072	20.2106	19.1012	19.0865	19.0939	-0.97714	-1.11672	0.139585	0.507986	0.461139	1.10159		7	7	7	21.7	21.7	21.7	49.419	40.989	6572800	20	3	4	3	3	1	2	3	4	3	3	1	2	3	4	3	3	1	2	10.1	11.7	13
Q8WXF1	Paraspeckle component 1	PSPC1	20.2245	19.8946	20.0595	20.6884	20.2062	20.4473	18.3406	18.4358	18.3882	-0.38778	-2.05915	1.67137	0.764305	0.239957	3.18517		6	6	6	17	17	17	58.743	15.933	7919600	19	2	1	4	3	2	0	2	1	4	3	2	0	2	1	4	3	2	0	4.8	2.1	9
Q8TE77	Protein phosphatase Slingshot homolog 3	SSH3	19.9992	19.1825	19.5909	20.0031	20.5498	20.2764	18.2348	19.3565	18.7957	-0.685575	-1.48075	0.795175	0.621758	0.358302	1.73529		10	10	10	20.3	20.3	20.3	72.995	27.222	8215900	32	3	1	4	3	4	3	3	1	4	3	4	3	3	1	4	3	4	3	7.3	1.4	9.1
Q49AR2	UPF0489 protein C5orf22	C5orf22	19.4379	19.6522	19.5451	20.2802	20.1889	20.2346	19.341	18.4892	18.9151	-0.689515	-1.31952	0.63001	0.620062	0.400667	1.54758	+	4	4	4	16.1	16.1	16.1	49.967	118.04	5598300	21	3	3	3	2	0	1	3	3	3	2	0	1	3	3	3	2	0	1	9.5	9.5	14
Q13451	Peptidyl-prolyl cis-trans isomerase FKBP5;Peptidyl-prolyl cis-trans isomerase FKBP5, N-terminally processed	FKBP5	19.3218	19.77	19.5459	20.5812	19.904	20.2426	19.1507	18.4808	18.8157	-0.69672	-1.42688	0.730155	0.616973	0.371936	1.65882		8	8	8	25.6	25.6	25.6	51.212	18.518	9104100	21	4	1	3	3	3	4	4	1	3	3	3	4	4	1	3	3	3	4	10.5	2	8.1
P09110	3-ketoacyl-CoA thiolase, peroxisomal	ACAA1	19.3557	19.6178	19.4867	20.0196	20.0122	20.0159	18.5432	18.7726	18.6579	-0.52918	-1.35796	0.82878	0.692948	0.390134	1.77618		10	10	10	34.9	34.9	34.9	44.292	70.872	5447600	26	1	1	3	1	6	7	1	1	3	1	6	7	1	1	3	1	6	7	5.4	5.4	11.8
P19387	DNA-directed RNA polymerase II subunit RPB3	POLR2C	19.9699	19.5853	19.7776	20.7661	20.466	20.6161	19.3448	17.8841	18.6145	-0.838475	-2.00161	1.16313	0.559234	0.249722	2.23943		7	7	7	43.3	43.3	43.3	31.441	28.541	6530800	16	2	2	3	2	6	1	2	2	3	2	6	1	2	2	3	2	6	1	11.6	6.9	15.3
Q93084	Sarcoplasmic/endoplasmic reticulum calcium ATPase 3	ATP2A3	20.4494	20.2279	20.3386	20.711	20.1098	20.4104	20.2122	19.2387	19.7254	-0.07174	-0.68495	0.61321	0.95149	0.622027	1.52966		16	11	11	20.3	13.7	13.7	113.98	30.355	8700300	38	10	6	10	10	7	6	7	2	6	5	4	3	7	2	6	5	4	3	12.5	7.7	13
Q86TX2;P49753	Acyl-coenzyme A thioesterase 1;Acyl-coenzyme A thioesterase 2, mitochondrial	ACOT1;ACOT2	20.6195	20.622	20.6208	20.9864	20.5373	20.7618	19.9034	19.3863	19.6449	-0.14102	-1.11691	0.975895	0.906878	0.461079	1.96686		6	6	6	19	19	19	46.277	16.037	12653000	22	2	3	5	4	2	1	2	3	5	4	2	1	2	3	5	4	2	1	5.2	10	14.5
Q63HN8	E3 ubiquitin-protein ligase RNF213	RNF213	20.3928	20.15	20.2714	20.3184	19.7734	20.0459	20.5393	19.647	20.0932	0.225535	0.0473	0.178235	1.16921	1.03333	1.1315		36	36	36	9	9	9	591.4	70.608	9329300	60	9	9	4	4	20	9	9	9	4	4	20	9	9	9	4	4	20	9	1.8	1.9	0.8
Q5TDH0	Protein DDI1 homolog 2	DDI2	19.9847	19.9682	19.9764	20.6833	20.3501	20.5167	19.7066	19.3592	19.5329	-0.540285	-0.98379	0.443505	0.687635	0.50565	1.3599		4	4	4	14.3	14.3	14.3	44.522	8.8727	6585500	27	3	2	2	2	1	2	3	2	2	2	1	2	3	2	2	2	1	2	9.5	5.8	5.8
Q5JSH3	WD repeat-containing protein 44	WDR44	20.551	21.1547	20.8529	20.5431	18.9026	19.7229	19.8598	18.725	19.2924	1.13003	-0.430475	1.5605	2.18863	0.742017	2.94957		11	11	11	13.8	13.8	13.8	101.37	24.247	9625400	28	4	3	3	3	7	1	4	3	3	3	7	1	4	3	3	3	7	1	4.7	3.6	3.6
Q08188	Protein-glutamine gamma-glutamyltransferase E;Protein-glutamine gamma-glutamyltransferase E 50 kDa catalytic chain;Protein-glutamine gamma-glutamyltransferase E 27 kDa non-catalytic chain	TGM3	20.2131	20.9442	20.5787	21.0635	18.66	19.8618	19.6187	20.1196	19.8692	0.7169	0.00739	0.70951	1.64365	1.00514	1.63525		8	8	8	15.4	15.4	15.4	76.631	62.308	7589200	25	3	4	7	1	1	0	3	4	7	1	1	0	3	4	7	1	1	0	6.8	7.6	13
P62070;P10301	Ras-related protein R-Ras2;Ras-related protein R-Ras	RRAS2;RRAS	20.9116	19.6681	20.2899	21.1653	19.8317	20.4985	19.4494	19.3555	19.4024	-0.20863	-1.09607	0.88744	0.865359	0.467789	1.84989		3	3	3	19.1	19.1	19.1	23.399	17.094	4046200	19	3	1	2	1	2	0	3	1	2	1	2	0	3	1	2	1	2	0	19.1	5.9	11.3
P46736	Lys-63-specific deubiquitinase BRCC36	BRCC3	20.1812	20.5221	20.3516	20.4513	19.9295	20.1904	20.3518	18.969	19.6604	0.161245	-0.53003	0.691275	1.11825	0.69254	1.61471		7	7	7	25.6	25.6	25.6	36.072	57.669	6529900	24	3	4	3	5	5	1	3	4	3	5	5	1	3	4	3	5	5	1	13.3	16.5	13.6
P46087	Probable 28S rRNA (cytosine(4447)-C(5))-methyltransferase	NOP2	20.1729	21.2144	20.6936	21.4901	20.0918	20.791	19.9522	19.6159	19.7841	-0.097315	-1.00691	0.909595	0.934771	0.497611	1.87852		9	9	9	13.8	13.8	13.8	89.301	90.062	12864000	32	2	3	5	4	5	4	2	3	5	4	5	4	2	3	5	4	5	4	3.6	3.9	7.5
O95630	STAM-binding protein	STAMBP	19.9188	20.776	20.3474	21.5384	19.9742	20.7563	19.406	18.1194	18.7627	-0.40888	-1.99357	1.58469	0.753208	0.251118	2.99942		4	4	4	10.1	10.1	10.1	48.076	7.9063	7850800	22	4	2	3	3	0	1	4	2	3	3	0	1	4	2	3	3	0	1	10.1	4.7	8
E9PSI1;O15321;Q9BY43	Transmembrane 9 superfamily member 1	TM9SF1	20.286	20.3805	20.3332	20.8855	20.013	20.4493	20.0229	18.7245	19.3737	-0.11601	-1.07556	0.959545	0.922736	0.474488	1.9447		5	5	5	6.7	6.7	6.7	92.386	17.592	6019500	15	3	4	5	3	0	0	3	4	5	3	0	0	3	4	5	3	0	0	4.3	5.6	6.7
O15394	Neural cell adhesion molecule 2	NCAM2	20.2051	20.4971	20.3511	20.5133	20.3023	20.4078	19.7168	18.5175	19.1171	-0.05667	-1.29063	1.23396	0.961481	0.408774	2.35211		8	8	8	10.5	10.5	10.5	93.045	19.317	8226400	17	3	2	6	5	0	0	3	2	6	5	0	0	3	2	6	5	0	0	3.5	2.3	8.4
Q9UJC3	Protein Hook homolog 1	HOOK1	20.0128	20.9821	20.4974	20.0171	20.7253	20.3712	19.7858	19.5088	19.6473	0.126245	-0.723895	0.85014	1.09145	0.605461	1.80268		12	12	12	21	21	21	84.647	82.553	12472000	36	7	5	6	4	6	4	7	5	6	4	6	4	7	5	6	4	6	4	12.4	9.5	10.7
Q9UHY7	Enolase-phosphatase E1	ENOPH1	20.2603	21.0193	20.6398	19.9459	20.7298	20.3379	18.9638	19.5921	19.278	0.30192	-1.05988	1.3618	1.23278	0.47967	2.57007		7	7	7	39.1	39.1	39.1	28.932	44.956	9139400	27	3	2	2	3	4	2	3	2	2	3	4	2	3	2	2	3	4	2	14.2	9.6	9.2
Q96S44	TP53-regulating kinase	TP53RK	20.1442	20.5576	20.3509	19.5287	19.9655	19.7471	19.0345	19.4267	19.2306	0.60378	-0.516545	1.12033	1.51969	0.699044	2.17396		3	3	3	19	19	19	28.16	54.458	5145800	14	2	1	2	2	2	0	2	1	2	2	2	0	2	1	2	2	2	0	11.9	8.3	11.9
Q96FZ2	Embryonic stem cell-specific 5-hydroxymethylcytosine-binding protein	HMCES	19.9988	20.017	20.0079	19.7915	20.5764	20.1839	19.1159	18.8275	18.9717	-0.17604	-1.21224	1.0362	0.885129	0.431598	2.05082		6	6	6	21.2	21.2	21.2	40.574	58.25	4931400	16	3	2	3	4	1	0	3	2	3	4	1	0	3	2	3	4	1	0	11.3	7.6	11.9
Q96C36;J3KR12	Pyrroline-5-carboxylate reductase 2	PYCR2	20.2474	20.4298	20.3386	19.8376	20.3266	20.0821	18.9697	19.4047	19.1872	0.25649	-0.894885	1.15137	1.19457	0.53779	2.22125		8	7	7	30	25.9	25.9	33.637	16.475	7830000	22	5	3	2	5	3	1	4	2	2	5	2	1	4	2	2	5	2	1	22.2	12.5	8.4
Q6GMV2	SET and MYND domain-containing protein 5	SMYD5	20.4773	20.756	20.6167	20.4765	20.5579	20.5172	19.2069	19.5944	19.4007	0.099485	-1.11655	1.21604	1.07139	0.461194	2.32308		6	6	6	19.1	19.1	19.1	47.34	16.528	23826000	18	4	3	3	2	2	0	4	3	3	2	2	0	4	3	3	2	2	0	13.6	7.4	7.4
Q05048	Cleavage stimulation factor subunit 1	CSTF1	20.6924	20.1412	20.4168	20.2476	21.2566	20.7521	19.6961	19.0902	19.3931	-0.335285	-1.35897	1.02369	0.792628	0.389861	2.03311		10	10	10	30.6	30.6	30.6	48.357	43.179	11866000	20	7	2	3	4	1	2	7	2	3	4	1	2	7	2	3	4	1	2	21.6	4.4	6
O15269	Serine palmitoyltransferase 1	SPTLC1	20.125	20.6182	20.3716	19.4004	20.402	19.9012	19.0806	18.7639	18.9222	0.470415	-0.97894	1.44936	1.38551	0.507352	2.73086		5	5	5	13.1	13.1	13.1	52.743	79.604	7201700	12	2	3	1	3	0	2	2	3	1	3	0	2	2	3	1	3	0	2	4.9	6.6	3
P15941	Mucin-1;Mucin-1 subunit alpha;Mucin-1 subunit beta	MUC1	20.2434	21.322	20.7827	20.8261	20.8109	20.8185	19.2238	18.5552	18.8895	-0.03577	-1.92904	1.89326	0.975511	0.262605	3.71475		4	4	4	4	4	4	122.1	8.7376	10558000	40	3	2	3	2	1	1	3	2	3	2	1	1	3	2	3	2	1	1	2.6	1.8	3.1
Q9UKD2	mRNA turnover protein 4 homolog	MRTO4	19.5258	20.5061	20.016	21.1709	21.8269	21.4989	18.9625	19.2283	19.0954	-1.48289	-2.40344	0.92054	0.35777	0.189014	1.89282		10	10	10	40.2	40.2	40.2	27.56	25.608	10899000	20	3	2	3	6	3	0	3	2	3	6	3	0	3	2	3	6	3	0	15.5	8.8	11.7
Q9BRP4	Proteasomal ATPase-associated factor 1	PAAF1	20.3093	21.2566	20.783	19.7638	21.2116	20.4877	18.5845	19.8166	19.2005	0.29527	-1.28716	1.58243	1.22711	0.409757	2.99474		7	7	7	21.4	21.4	21.4	42.19	27.979	13340000	27	6	6	3	5	1	2	6	6	3	5	1	2	6	6	3	5	1	2	18.9	18.1	8.4
Q96G23	Ceramide synthase 2	CERS2	18.9987	20.8147	19.9067	19.3417	21.2614	20.3015	18.5599	19.7407	19.1503	-0.394815	-1.15123	0.75642	0.760587	0.45024	1.68929		4	4	4	9.2	9.2	9.2	44.876	8.074	8840300	17	2	2	2	3	2	2	2	2	2	3	2	2	2	2	2	3	2	2	4.5	4.5	6.6
O94905	Erlin-2	ERLIN2	19.883	21.2775	20.5803	20.4806	21.1752	20.8279	19.0417	20.3114	19.6765	-0.24766	-1.15138	0.903725	0.842261	0.450193	1.87089		7	7	5	23	23	15.9	37.839	130.98	14482000	24	3	2	7	6	2	3	3	2	7	6	2	3	1	1	5	4	1	1	10.6	7.1	23
Q14165	Malectin	MLEC	19.721	20.2029	19.962	19.8695	21.062	20.4657	18.4429	19.3897	18.9163	-0.503785	-1.54948	1.04569	0.705254	0.341633	2.06436		5	5	5	23.3	23.3	23.3	32.233	17.441	6216100	22	2	2	2	3	2	2	2	2	2	3	2	2	2	2	2	3	2	2	8.6	8.6	8.6
Q9Y6U3	Adseverin	SCIN	20.49	20.2558	20.3729	21.2641	20.9788	21.1215	18.7333	19.3383	19.0358	-0.74854	-2.08565	1.33711	0.595206	0.23559	2.52645		13	13	13	25.2	25.2	25.2	80.488	65.515	11994000	28	7	3	8	8	1	0	7	3	8	8	1	0	7	3	8	8	1	0	14.7	6.2	15.1
Q9NR46	Endophilin-B2	SH3GLB2	21.1304	20.8297	20.98	21.0558	20.1162	20.586	19.0348	19.2779	19.1563	0.39405	-1.42966	1.82371	1.31408	0.37122	3.53989		5	5	4	12.9	12.9	10.9	43.973	63.94	7191400	22	3	3	3	3	1	3	3	3	3	3	1	3	3	3	3	3	0	3	8.1	8.1	8.9
Q9H223	EH domain-containing protein 4	EHD4	20.485	20.6601	20.5726	21.4336	20.3597	20.8967	18.6764	20.3767	19.5265	-0.324065	-1.37011	1.04604	0.798816	0.386863	2.06485		11	11	10	24	24	22	61.174	47.674	14014000	42	8	3	4	7	4	3	8	3	4	7	4	3	7	3	4	6	4	3	16.5	7.2	8.7
Q52LJ0	Protein FAM98B	FAM98B	20.6566	20.5225	20.5896	20.6668	20.3339	20.5003	18.4851	19.3914	18.9383	0.089225	-1.56206	1.65129	1.0638	0.338667	3.14113		4	4	4	15.2	15.2	15.2	37.19	78.869	9860100	27	2	2	3	2	1	2	2	2	3	2	1	2	2	2	3	2	1	2	7.6	7.6	11.8
Q4G0N4	NAD kinase 2, mitochondrial	NADK2	19.8451	20.3212	20.0832	20.5321	20.4251	20.4786	18.2409	19.437	18.8389	-0.39546	-1.63967	1.24421	0.760247	0.32093	2.36889		7	7	7	19	19	19	49.432	24.687	4559700	21	5	4	3	3	0	0	5	4	3	3	0	0	5	4	3	3	0	0	14.9	9.7	7.9
Q13557;Q9UQM7	Calcium/calmodulin-dependent protein kinase type II subunit delta	CAMK2D	19.8724	19.7323	19.8024	21.0558	20.8592	20.9575	18.9804	19.7455	19.3629	-1.15518	-1.59459	0.439405	0.449009	0.331116	1.35604	+	8	8	6	20.2	20.2	14	56.369	30.092	8627800	26	2	2	5	7	0	1	2	2	5	7	0	1	0	1	3	5	0	1	6.2	5.8	14.4
Q13144	Translation initiation factor eIF-2B subunit epsilon	EIF2B5	20.6011	20.0298	20.3155	20.7188	20.2326	20.4757	18.1501	20.5725	19.3613	-0.160165	-1.11438	0.954215	0.894923	0.46189	1.93753		4	4	4	5.8	5.8	5.8	80.379	30.742	11115000	19	3	2	3	2	1	2	3	2	3	2	1	2	3	2	3	2	1	2	4.2	2.8	4.4
P55809;Q9BYC2	Succinyl-CoA:3-ketoacid coenzyme A transferase 1, mitochondrial	OXCT1	20.6512	19.3527	20.0019	21.3489	21.1734	21.2612	19.188	19.8579	19.523	-1.25926	-1.73822	0.478965	0.417758	0.299738	1.39374		8	8	8	21.3	21.3	21.3	56.157	27.737	12047000	20	3	3	5	5	0	1	3	3	5	5	0	1	3	3	5	5	0	1	10.4	6.5	12.1
P41223	Protein BUD31 homolog	BUD31	20.5576	19.329	19.9433	21.2163	20.6813	20.9488	18.7112	20.262	19.4866	-1.00553	-1.46222	0.45669	0.498087	0.362934	1.37239		6	6	6	39.6	39.6	39.6	17	13.946	4192900	22	2	2	2	3	4	2	2	2	2	3	4	2	2	2	2	3	4	2	14.6	12.5	14.6
P55210	Caspase-7;Caspase-7 subunit p20;Caspase-7 subunit p11	CASP7	21.4387	20.1381	20.7884	20.8497	20.4457	20.6477	19.1139	20.378	19.746	0.140725	-0.901665	1.04239	1.10246	0.535269	2.05964		3	3	3	14.9	14.9	14.9	34.276	68.17	10636000	19	3	2	2	2	1	2	3	2	2	2	1	2	3	2	2	2	1	2	14.9	10.2	10.2
P51003;Q9NRJ5;Q9BWT3	Poly(A) polymerase alpha	PAPOLA	18.2548	17.7194	17.9871	18.2743	19.494	18.8841	19.345	17.045	18.195	-0.897	-0.689075	-0.207925	0.537002	0.620251	0.865782		10	10	10	17	17	17	82.842	18.49	3226400	18	4	1	3	2	3	5	4	1	3	2	3	5	4	1	3	2	3	5	5.5	1.3	3.9
Q9H269	Vacuolar protein sorting-associated protein 16 homolog	VPS16	17.5105	18.1052	17.8079	17.5019	19.203	18.3524	19.971	18.2934	19.1322	-0.54457	0.779755	-1.32432	0.685596	1.71684	0.399336		3	3	3	4.2	4.2	4.2	94.693	13.969	2342300	10	2	2	2	1	2	1	2	2	2	1	2	1	2	2	2	1	2	1	3.3	3.3	3.3
P21281;P15313	V-type proton ATPase subunit B, brain isoform;V-type proton ATPase subunit B, kidney isoform	ATP6V1B2;ATP6V1B1	19.4781	18.9939	19.236	18.0586	20.7862	19.4224	18.5645	19.7387	19.1516	-0.186345	-0.270795	0.08445	0.878829	0.828863	1.06028		9	9	9	24.5	24.5	24.5	56.5	19.08	5976800	16	2	1	2	3	3	6	2	1	2	3	3	6	2	1	2	3	3	6	4.7	2.2	5.3
Q9HD45	Transmembrane 9 superfamily member 3	TM9SF3	17.8136	19.8208	18.8172	19.4257	20.6888	20.0573	18.7202	19.1272	18.9237	-1.24007	-1.13356	-0.106515	0.423351	0.45579	0.928829		5	5	5	8.7	8.7	8.7	67.887	7.0451	4953100	14	1	3	2	3	0	3	1	3	2	3	0	3	1	3	2	3	0	3	1.9	4.8	3.7
Q8WWY3	U4/U6 small nuclear ribonucleoprotein Prp31	PRPF31	18.7489	19.8762	19.3125	19.9897	19.9748	19.9822	18.1656	17.9844	18.075	-0.66971	-1.90719	1.23748	0.628633	0.266611	2.35786		7	7	7	22.2	22.2	22.2	55.455	24.298	6200700	18	0	2	3	3	3	2	0	2	3	3	3	2	0	2	3	3	3	2	0	3.8	7.8
P08621	U1 small nuclear ribonucleoprotein 70 kDa	SNRNP70	17.604	20.8297	19.2169	19.5301	20.3324	19.9313	17.1951	18.8082	18.0016	-0.714415	-1.92963	1.21522	0.609452	0.262496	2.32175		8	8	8	21.5	21.5	21.5	51.556	12.492	8818200	21	4	2	2	2	1	3	4	2	2	2	1	3	4	2	2	2	1	3	11.7	4.6	4.6
P49841	Glycogen synthase kinase-3 beta	GSK3B	18.2609	20.7337	19.4973	20.1699	20.8329	20.5014	18.3763	17.9794	18.1778	-1.00408	-2.32357	1.31949	0.49859	0.199773	2.49579		5	5	5	19	19	19	46.744	10.148	13216000	16	2	2	2	2	3	3	2	2	2	2	3	3	2	2	2	2	3	3	7.6	7.9	7.9
Q9UKL0;Q9P2K3	REST corepressor 1;REST corepressor 3	RCOR1;RCOR3	19.0329	18.5868	18.8099	19.5017	19.1311	19.3164	18.5426	19.4568	18.9997	-0.506565	-0.31675	-0.189815	0.703896	0.802877	0.876718		4	4	4	11.8	11.8	11.8	53.027	10.165	2384800	14	2	0	2	3	2	0	2	0	2	3	2	0	2	0	2	3	2	0	5.8	0	5.8
Q9H488	GDP-fucose protein O-fucosyltransferase 1	POFUT1	19.1139	19.1345	19.1242	19.2978	19.7717	19.5347	18.7068	19.5426	19.1247	-0.41054	-0.41	-0.00054	0.752342	0.752623	0.999626		4	4	4	13.4	13.4	13.4	43.955	6.9895	5030700	11	3	1	2	3	0	1	3	1	2	3	0	1	3	1	2	3	0	1	10.8	2.6	5.2
Q9H2W6	39S ribosomal protein L46, mitochondrial	MRPL46	18.9959	19.7839	19.3899	19.3366	19.3063	19.3215	18.4406	19.2017	18.8212	0.068425	-0.500315	0.56874	1.04857	0.706952	1.48323		3	3	3	17.9	17.9	17.9	31.705	41.312	2492000	14	2	1	2	2	3	2	2	1	2	2	3	2	2	1	2	2	3	2	9.7	4.7	9.7
Q9BWU0	Kanadaptin	SLC4A1AP	19.6828	19.006	19.3444	19.691	19.1684	19.4297	18.1997	19.6841	18.9419	-0.08526	-0.48779	0.40253	0.942615	0.713117	1.32182		8	8	8	14.4	14.4	14.4	88.813	19.152	4940200	24	3	2	4	2	4	3	3	2	4	2	4	3	3	2	4	2	4	3	5.7	4.6	5.8
Q8NCN5	Pyruvate dehydrogenase phosphatase regulatory subunit, mitochondrial	PDPR	18.8403	19.4489	19.1446	17.9399	19.2442	18.592	18.3387	19.0225	18.6806	0.55259	0.0886	0.46399	1.46672	1.06334	1.37935		9	9	9	13.1	13.1	13.1	99.363	20.48	3462900	18	2	4	1	3	3	4	2	4	1	3	3	4	2	4	1	3	3	4	2.7	4.9	1.5
Q8IX12	Cell division cycle and apoptosis regulator protein 1	CCAR1	18.8296	19.2478	19.0387	18.7592	19.3258	19.0425	17.8602	20.2541	19.0572	-0.003795	0.014645	-0.01844	0.997373	1.0102	0.9873		7	7	7	9	9	9	132.82	11.344	3053200	20	3	1	2	2	3	3	3	1	2	2	3	3	3	1	2	2	3	3	3.8	1.5	2.3
Q2NL82	Pre-rRNA-processing protein TSR1 homolog	TSR1	19.0643	19.3662	19.2152	18.471	19.2198	18.8454	17.3126	19.4272	18.3699	0.36983	-0.47548	0.84531	1.2922	0.719227	1.79665		12	12	12	20	20	20	91.809	26.512	5619500	24	5	2	6	2	5	3	5	2	6	2	5	3	5	2	6	2	5	3	7.3	3.1	8.8
Q13740	CD166 antigen	ALCAM	19.7134	19.2098	19.4616	19.5395	20.2557	19.8976	17.9738	19.072	18.5229	-0.43602	-1.37473	0.938715	0.739171	0.385624	1.91682		4	4	4	8.2	8.2	8.2	65.102	12.774	6286000	11	2	1	3	3	0	0	2	1	3	3	0	0	2	1	3	3	0	0	4.6	1.9	6.5
Q08379	Golgin subfamily A member 2	GOLGA2	19.0988	19.3625	19.2307	19.6439	19.8156	19.7297	18.5909	20.1958	19.3934	-0.499085	-0.33638	-0.162705	0.707555	0.792026	0.893349		10	10	10	10.2	10.2	10.2	113.08	59.264	4965800	26	4	2	7	5	3	0	4	2	7	5	3	0	4	2	7	5	3	0	4.7	2.3	7.9
Q05655	Protein kinase C delta type;Protein kinase C delta type regulatory subunit;Protein kinase C delta type catalytic subunit	PRKCD	18.2749	19.3623	18.8186	20.056	20.0232	20.0396	18.3955	19.5116	18.9536	-1.22106	-1.08608	-0.134985	0.428967	0.471041	0.910679		10	10	9	19.4	19.4	17.9	77.504	50.396	6417600	27	3	2	5	3	2	4	3	2	5	3	2	4	3	2	4	3	2	4	6.2	3.3	9
P37268	Squalene synthase	FDFT1	19.5773	19.5115	19.5444	19.1046	19.3195	19.2121	18.4718	18.9866	18.7292	0.33238	-0.48288	0.81526	1.25909	0.715548	1.75962		9	9	9	26.9	26.9	26.9	48.115	36.097	5754000	24	8	2	4	2	2	2	8	2	4	2	2	2	8	2	4	2	2	2	23.5	6.7	12
P22033	Methylmalonyl-CoA mutase, mitochondrial	MUT	19.5919	18.8579	19.2249	19.3827	19.9024	19.6425	17.2038	19.2312	18.2175	-0.417645	-1.42505	1.0074	0.748646	0.372408	2.01028		6	6	6	9.3	9.3	9.3	83.134	19.504	4804400	16	3	2	4	4	3	0	3	2	4	4	3	0	3	2	4	4	3	0	4.4	2.9	6
O94855	Protein transport protein Sec24D	SEC24D	19.2712	19.2397	19.2554	19.1066	18.9549	19.0308	18.8052	19.2636	19.0344	0.224635	0.00362	0.221015	1.16848	1.00251	1.16555		10	10	10	11.6	11.6	11.6	113.01	42.443	5698900	24	3	1	3	3	3	7	3	1	3	3	3	7	3	1	3	3	3	7	3.6	1.5	2.1
P11717	Cation-independent mannose-6-phosphate receptor	IGF2R	19.1871	19.4416	19.3143	19.6023	19.4012	19.5017	17.0908	19.8328	18.4618	-0.18742	-1.03992	0.852505	0.878175	0.486353	1.80563		10	10	10	4.8	4.8	4.8	274.37	31.517	3686200	22	2	8	3	4	3	3	2	8	3	4	3	3	2	8	3	4	3	3	0.9	3.7	1.4
Q9H4A6	Golgi phosphoprotein 3	GOLPH3	18.4037	19.4401	18.9219	17.9992	18.7227	18.3609	18.3174	18.5463	18.4319	0.56098	0.07095	0.49003	1.47527	1.05041	1.40447		2	2	2	9.4	9.4	9.4	33.81	21.017	2618900	9	2	2	2	1	1	0	2	2	2	1	1	0	2	2	2	1	1	0	9.4	9.4	9.4
Q9H0W9	Ester hydrolase C11orf54	C11orf54	17.3686	19.3469	18.3578	19.3266	18.7257	19.0262	18.7495	18.8199	18.7847	-0.66839	-0.241495	-0.426895	0.629208	0.845868	0.743861		3	3	3	11.4	11.4	11.4	35.117	5.1672	981650	8	0	0	1	2	3	2	0	0	1	2	3	2	0	0	1	2	3	2	0	0	3.8
Q9C0D3	Protein zyg-11 homolog B	ZYG11B	17.8815	18.2649	18.0732	18.7586	18.7743	18.7665	17.8517	18.5727	18.2122	-0.69325	-0.55425	-0.139	0.618459	0.681011	0.908148		3	3	3	4.7	4.7	4.7	83.92	13.684	2679500	8	2	2	2	2	0	0	2	2	2	2	0	0	2	2	2	2	0	0	3.4	3.4	3.2
Q96EE3	Nucleoporin SEH1	SEH1L	18.4673	19.1921	18.8297	19.1018	18.5536	18.8277	19.0771	18.8672	18.9722	0.002025	0.144475	-0.14245	1.0014	1.10533	0.905979		4	4	4	17.2	17.2	17.2	39.648	13.465	2328800	11	3	2	2	2	3	0	3	2	2	2	3	0	3	2	2	2	3	0	12.5	6.9	6.9
Q96BW5	Phosphotriesterase-related protein	PTER	18.1169	19.3682	18.7426	19.793	19.727	19.76	19.6137	18.9396	19.2766	-1.01745	-0.48336	-0.534095	0.493987	0.71531	0.690592		4	4	4	11.5	11.5	11.5	39.017	9.4102	2325800	10	0	1	1	2	3	3	0	1	1	2	3	3	0	1	1	2	3	3	0	3.4	3.4
Q8WX92	Negative elongation factor B	NELFB	17.7534	19.3676	18.5605	20.0422	18.8303	19.4363	18.3391	19.5162	18.9277	-0.875785	-0.508565	-0.36722	0.544957	0.702921	0.775275		5	5	5	13.6	13.6	13.6	65.697	8.5961	1961000	9	0	3	0	2	1	3	0	3	0	2	1	3	0	3	0	2	1	3	0	6.6	0
Q8TEM1	Nuclear pore membrane glycoprotein 210	NUP210	17.8484	19.4525	18.6504	19.1827	19.5986	19.3906	19.1319	19.0268	19.0794	-0.740195	-0.311245	-0.42895	0.598658	0.805946	0.742802		10	10	10	6.8	6.8	6.8	205.11	20.324	3009600	13	0	2	3	5	3	1	0	2	3	5	3	1	0	2	3	5	3	1	0	1.6	2.1
Q8IXB1	DnaJ homolog subfamily C member 10	DNAJC10	17.4295	18.7514	18.0904	19.2725	19.6812	19.4769	18.2888	18.5781	18.4335	-1.38647	-1.04344	-0.343025	0.3825	0.485168	0.788387		4	4	4	5.3	5.3	5.3	91.079	17.642	3065700	12	1	3	3	4	1	0	1	3	3	4	1	0	1	3	3	4	1	0	1.5	3.8	4
Q6PJG6	BRCA1-associated ATM activator 1	BRAT1	18.1998	18.541	18.3704	19.1502	19.6677	19.409	19.3226	18.9616	19.1421	-1.03855	-0.266845	-0.771705	0.486817	0.831135	0.585725		10	10	10	18	18	18	88.118	69.459	2968100	19	3	2	1	0	6	5	3	2	1	0	6	5	3	2	1	0	6	5	5.2	3.8	1.3
P49354	Protein farnesyltransferase/geranylgeranyltransferase type-1 subunit alpha	FNTA	18.6002	18.6848	18.6425	19.2837	19.1851	19.2344	19.0133	18.7417	18.8775	-0.59189	-0.356895	-0.234995	0.663473	0.780843	0.849688	+	7	7	7	22.7	22.7	22.7	44.408	18.039	2846600	18	3	3	3	1	2	0	3	3	3	1	2	0	3	3	3	1	2	0	8.7	9.5	8.2
P46734;P52564	Dual specificity mitogen-activated protein kinase kinase 3	MAP2K3	17.6081	18.6047	18.1064	18.1607	19.4209	18.7908	18.9508	19.0591	19.0049	-0.68445	0.214135	-0.898585	0.622243	1.16001	0.536413		4	4	4	13.5	13.5	13.5	39.318	17.288	1931300	9	0	1	0	3	2	3	0	1	0	3	2	3	0	1	0	3	2	3	0	4	0
P30837	Aldehyde dehydrogenase X, mitochondrial	ALDH1B1	18.4376	19.1234	18.7805	19.2639	19.1708	19.2173	18.3139	18.6753	18.4946	-0.43684	-0.722735	0.285895	0.738751	0.605948	1.21917		4	4	4	8.3	8.3	8.3	57.206	9.7696	2965900	8	2	1	3	2	0	0	2	1	3	2	0	0	2	1	3	2	0	0	5	1.4	7
P17301	Integrin alpha-2	ITGA2	17.0697	19.5582	18.3139	18.516	19.7531	19.1346	19.1972	18.0745	18.6358	-0.82062	-0.498735	-0.321885	0.566199	0.707727	0.800024		7	7	7	6.6	6.6	6.6	129.29	15.76	3311700	12	0	2	2	4	4	1	0	2	2	4	4	1	0	2	2	4	4	1	0	2	2.3
A0FGR8	Extended synaptotagmin-2	ESYT2	18.0882	19.1607	18.6244	18.8499	19.3246	19.0873	19.2724	19.3462	19.3093	-0.46284	0.222025	-0.684865	0.725557	1.16637	0.622064		6	6	6	8.4	8.4	8.4	102.36	14.576	1697100	12	2	0	0	3	3	4	2	0	0	3	3	4	2	0	0	3	3	4	3	0	0
O15397	Importin-8	IPO8	17.5805	19.3487	18.4646	19.744	19.0127	19.3783	18.486	18.7012	18.5936	-0.91375	-0.78476	-0.12899	0.530804	0.580449	0.914471		7	6	6	8.6	7.6	7.6	119.94	49.222	2801900	15	2	2	2	5	2	4	1	2	2	4	2	3	1	2	2	4	2	3	2.2	2.5	2.4
Q9NXA8	NAD-dependent protein deacylase sirtuin-5, mitochondrial	SIRT5	19.035	18.0631	18.549	19.6436	19.9034	19.7735	17.8893	18.7534	18.3213	-1.22452	-1.45221	0.227695	0.427941	0.365461	1.17096		3	3	3	14.5	14.5	14.5	33.881	30.248	3206700	8	2	1	2	3	1	0	2	1	2	3	1	0	2	1	2	3	1	0	10.6	5.2	10.6
Q9H0D6	5-3 exoribonuclease 2	XRN2	19.5297	18.8165	19.1731	19.583	19.6265	19.6047	18.1496	18.0877	18.1186	-0.431635	-1.48608	1.05445	0.741421	0.356981	2.07692		15	15	15	19.9	19.9	19.9	108.58	39.164	6472300	35	4	2	3	5	6	8	4	2	3	5	6	8	4	2	3	5	6	8	6.8	1.8	3.1
Q9BYD1	39S ribosomal protein L13, mitochondrial	MRPL13	20.3187	17.691	19.0048	19.4004	19.9592	19.6798	16.8725	19.4878	18.1802	-0.67495	-1.4996	0.824655	0.626354	0.35365	1.77111		5	5	5	29.2	29.2	29.2	20.692	8.6837	1916300	15	4	0	2	3	2	1	4	0	2	3	2	1	4	0	2	3	2	1	20.8	0	11.2
Q14790	Caspase-8;Caspase-8 subunit p18;Caspase-8 subunit p10	CASP8	18.8624	18.6473	18.7548	19.4617	19.1255	19.2936	17.2262	17.6268	17.4265	-0.538745	-1.86707	1.32833	0.688369	0.274129	2.51112		4	4	4	9.2	9.2	9.2	55.391	16.576	4349500	14	2	2	2	3	1	2	2	2	2	3	1	2	2	2	2	3	1	2	5	5	5
P13807	Glycogen [starch] synthase, muscle	GYS1	19.2745	16.9078	18.0911	19.6438	20.1046	19.8742	18.8943	18.2457	18.57	-1.78303	-1.30416	-0.478875	0.290571	0.404957	0.717537		10	10	9	19.9	19.9	18.6	83.785	29.435	5390000	19	2	0	3	3	7	4	2	0	3	3	7	4	2	0	2	2	7	4	2.6	0	3.9
P04818	Thymidylate synthase	TYMS	19.1136	17.818	18.4658	19.2411	19.8721	19.5566	18.3436	18.5898	18.4667	-1.09084	-1.0899	-0.00094	0.469488	0.469794	0.999349		6	6	6	24	24	24	35.716	33.425	3242400	14	3	0	3	4	3	0	3	0	3	4	3	0	3	0	3	4	3	0	12.5	0	11.8
O94804	Serine/threonine-protein kinase 10	STK10	19.1381	18.5194	18.8287	19.2159	20.1166	19.6663	18.0669	17.7559	17.9114	-0.837525	-1.75483	0.917305	0.559603	0.296308	1.88858		5	4	4	6.2	5.3	5.3	112.13	22.598	2436200	10	3	1	2	0	5	0	2	0	2	0	4	0	2	0	2	0	4	0	3.3	0.9	2.4
O75306	NADH dehydrogenase [ubiquinone] iron-sulfur protein 2, mitochondrial	NDUFS2	19.9672	18.1887	19.0779	20.1591	20.5336	20.3463	17.5734	16.9444	17.2589	-1.26838	-3.08742	1.81903	0.415126	0.117651	3.52845		4	4	4	8.4	8.4	8.4	52.545	24.261	8670500	11	3	1	2	4	0	0	3	1	2	4	0	0	3	1	2	4	0	0	6	2.6	4.3
O76031	ATP-dependent Clp protease ATP-binding subunit clpX-like, mitochondrial	CLPX	19.4385	17.838	18.6383	19.7731	19.4034	19.5883	17.9746	18.7927	18.3837	-0.94999	-1.20463	0.25464	0.517636	0.433881	1.19304		5	5	5	8.8	8.8	8.8	69.223	16.543	2143000	11	1	0	3	3	0	3	1	0	3	3	0	3	1	0	3	3	0	3	2.1	0	5.7
Q9NXR7	BRCA1-A complex subunit BRE	BRE	17.9516	19.6113	18.7814	17.9918	18.8698	18.4308	19.8563	20.4401	20.1482	0.3506	1.71736	-1.36676	1.27509	3.28833	0.387762		4	4	4	13.6	13.6	13.6	43.551	27.477	5505600	20	3	3	1	3	2	2	3	3	1	3	2	2	3	3	1	3	2	2	11	9.9	3.7
Q9H9T3	Elongator complex protein 3	ELP3	17.1368	17.6133	17.375	17.854	18.0571	17.9556	19.107	20.0155	19.5612	-0.58052	1.60567	-2.18619	0.668723	3.04338	0.21973		6	6	6	13.3	13.3	13.3	62.258	9.5657	2312200	13	2	2	2	2	4	1	2	2	2	2	4	1	2	2	2	2	4	1	4.2	3.8	4.2
Q9C0B1	Alpha-ketoglutarate-dependent dioxygenase FTO	FTO	18.194	19.4929	18.8435	18.3971	18.5517	18.4744	19.6274	20.6882	20.1578	0.36905	1.68339	-1.31434	1.2915	3.21183	0.402108		9	9	9	22	22	22	58.281	41.748	5083500	18	5	1	2	2	4	3	5	1	2	2	4	3	5	1	2	2	4	3	11.9	1.6	4.6
Q15024	Exosome complex component RRP42	EXOSC7	18.346	19.6336	18.9898	17.2259	18.2806	17.7532	18.8396	19.2817	19.0607	1.23655	1.30746	-0.070905	2.35634	2.47505	0.952041		7	7	7	40.2	40.2	40.2	31.821	32.461	2127400	12	0	0	3	2	5	2	0	0	3	2	5	2	0	0	3	2	5	2	0	0	12.4
P11117	Lysosomal acid phosphatase	ACP2	18.61	18.1989	18.4044	17.4783	18.633	18.0557	20.1176	19.1025	19.6101	0.348735	1.55438	-1.20565	1.27344	2.93708	0.433574		3	3	3	6.9	6.9	6.9	48.344	3.6517	1906100	8	3	2	2	1	0	0	3	2	2	1	0	0	3	2	2	1	0	0	6.9	4.3	4.3
P20936	Ras GTPase-activating protein 1	RASA1	18.3009	18.9535	18.6272	17.366	18.5346	17.9503	19.7231	20.3824	20.0527	0.67694	2.10244	-1.4255	1.59875	4.29435	0.37229		9	9	9	11.7	11.7	11.7	116.4	21.073	2312600	20	0	0	0	3	8	6	0	0	0	3	8	6	0	0	0	3	8	6	0	0	0
Q9NRN7	L-aminoadipate-semialdehyde dehydrogenase-phosphopantetheinyl transferase	AASDHPPT	18.6229	19.9213	19.2721	19.0122	18.3729	18.6926	20.079	19.1081	19.5936	0.579535	0.90098	-0.321445	1.49437	1.86733	0.800268		5	5	5	19.4	19.4	19.4	35.776	20.968	2260400	12	1	0	2	1	5	3	1	0	2	1	5	3	1	0	2	1	5	3	2.6	0	7.4
Q9NP58	ATP-binding cassette sub-family B member 6, mitochondrial	ABCB6	18.5386	20.6023	19.5705	18.4029	18.1159	18.2594	18.9127	19.0391	18.9759	1.31108	0.71651	0.594575	2.48128	1.6432	1.51003		6	6	6	7.7	7.7	7.7	93.884	20.572	2802700	12	2	6	1	2	0	0	2	6	1	2	0	0	2	6	1	2	0	0	3.2	7.7	1.4
P57678	Gem-associated protein 4	GEMIN4	17.8691	20.2116	19.0403	18.54	18.1201	18.3301	19.876	20.1262	20.0011	0.71027	1.67105	-0.96078	1.63611	3.18446	0.513779		11	11	11	13.7	13.7	13.7	120.04	22.901	3834100	18	2	4	0	0	6	5	2	4	0	0	6	5	2	4	0	0	6	5	2.2	4	0
Q6ZNJ1	Neurobeachin-like protein 2	NBEAL2	17.8294	19.9199	18.8746	18.7008	17.0102	17.8555	19.5241	19.6031	19.5636	1.01912	1.70811	-0.68899	2.02669	3.26734	0.620288		11	11	11	5.1	5.1	5.1	302.51	24.817	3385200	15	2	3	1	0	8	5	2	3	1	0	8	5	2	3	1	0	8	5	0.8	1.2	0.3
Q9NVI1	Fanconi anemia group I protein	FANCI	18.6718	18.8494	18.7606	18.8616	18.0858	18.4737	21.4214	18.8154	20.1184	0.286925	1.64469	-1.35777	1.22004	3.12682	0.390185		24	24	24	24	24	24	149.32	171.16	3619400	32	0	0	3	4	19	5	0	0	3	4	19	5	0	0	3	4	19	5	0	0	2.9
P40818	Ubiquitin carboxyl-terminal hydrolase 8	USP8	19.6361	18.8293	19.2327	19.3941	18.1727	18.7834	21.1274	17.8201	19.4737	0.449335	0.690365	-0.24103	1.36541	1.61369	0.846141		12	12	12	15	15	15	127.52	35.96	6208900	29	3	2	2	2	10	0	3	2	2	2	10	0	3	2	2	2	10	0	3.9	2.1	2.8
Q5VTR2	E3 ubiquitin-protein ligase BRE1A	RNF20	18.2003	18.492	18.3462	18.8742	18.358	18.6161	20.79	18.573	19.6815	-0.26995	1.06541	-1.33536	0.829348	2.09276	0.396293		11	11	9	18.3	18.3	15.4	113.66	149.05	3346100	18	1	0	2	2	10	2	1	0	2	2	10	2	1	0	2	2	8	2	1.4	0	2.6
Q9Y376	Calcium-binding protein 39	CAB39	18.204	18.8078	18.5059	19.1838	19.6459	19.4149	20.1613	20.0317	20.0965	-0.90895	0.68164	-1.59059	0.532573	1.60396	0.332036		8	8	8	23.8	23.8	23.8	39.869	12.981	6437300	16	2	3	1	3	3	3	2	3	1	3	3	3	2	3	1	3	3	3	5	10.3	2.1
Q9NWT6	Hypoxia-inducible factor 1-alpha inhibitor	HIF1AN	17.9451	17.6966	17.8209	20.2382	18.8066	19.5224	19.7798	19.6143	19.6971	-1.70151	0.17469	-1.8762	0.307464	1.12872	0.2724		5	5	5	19.2	19.2	19.2	40.285	65.274	4087800	15	0	1	2	1	5	4	0	1	2	1	5	4	0	1	2	1	5	4	0	3.7	8.3
Q9H267	Vacuolar protein sorting-associated protein 33B	VPS33B	18.1378	17.8071	17.9724	20.152	19.9461	20.049	20.1588	20.2091	20.1839	-2.07664	0.134905	-2.21155	0.237065	1.09802	0.215902	+	12	12	12	23.2	23.2	23.2	70.584	23.454	4171100	23	1	1	4	4	5	7	1	1	4	4	5	7	1	1	4	4	5	7	1.8	1.8	7.3
Q9H0A0	N-acetyltransferase 10	NAT10	18.7127	17.4734	18.093	20.2081	19.3667	19.7874	20.7853	20.0738	20.4296	-1.69438	0.64213	-2.33651	0.308986	1.56063	0.197988		15	15	15	17.9	17.9	17.9	115.73	56.494	4755400	34	3	1	2	2	9	9	3	1	2	2	9	9	3	1	2	2	9	9	3.6	1.5	2.4
Q96PK6;A0A0A0MSL8	RNA-binding protein 14	RBM14;RBM14-RBM4	17.8484	19.0358	18.4421	19.9214	19.5524	19.7369	19.921	19.1687	19.5448	-1.29483	-0.19211	-1.10272	0.407586	0.875325	0.465639		2	2	2	4.6	4.6	4.6	69.491	17.959	3706200	15	1	1	2	1	2	2	1	1	2	1	2	2	1	1	2	1	2	2	2.4	2.4	4.6
Q96CD2	Phosphopantothenoylcysteine decarboxylase	PPCDC	18.5698	18.2183	18.3941	20.3633	19.5908	19.977	19.9033	19.7309	19.8171	-1.58296	-0.15997	-1.42299	0.333796	0.895044	0.372939		3	3	3	20.1	20.1	20.1	22.395	11.924	2829800	18	1	1	2	2	2	3	1	1	2	2	2	3	1	1	2	2	2	3	5.9	5.9	11.8
Q86TP1	Protein prune homolog	PRUNE	17.4673	19.133	18.3002	19.4328	19.5109	19.4719	19.8485	19.5369	19.6927	-1.17173	0.220825	-1.39255	0.443889	1.1654	0.38089		6	6	6	19.2	19.2	19.2	50.199	24.284	4658400	13	0	0	2	4	4	2	0	0	2	4	4	2	0	0	2	4	4	2	0	0	5.1
Q6L8Q7	2,5-phosphodiesterase 12	PDE12	17.8735	18.5514	18.2124	20.5769	20.269	20.4229	20.6355	18.6659	19.6507	-2.2105	-0.77225	-1.43825	0.216059	0.585504	0.369015	+	12	12	12	30.9	30.9	30.9	67.351	62.408	5424500	18	3	3	2	4	3	3	3	3	2	4	3	3	3	3	2	4	3	3	12.8	10.5	3.6
P50750	Cyclin-dependent kinase 9	CDK9	17.6841	18.7034	18.1938	20.3406	19.7716	20.0561	20.5865	19.8438	20.2152	-1.86233	0.159075	-2.0214	0.275033	1.11657	0.246319		8	7	7	22.3	20.2	20.2	42.777	69.873	4019800	23	2	2	4	5	6	5	1	1	3	4	5	4	1	1	3	4	5	4	5.1	5.6	11
P46063	ATP-dependent DNA helicase Q1	RECQL	19.2068	18.1531	18.68	19.8154	19.8991	19.8573	19.7294	19.9199	19.8246	-1.17728	-0.03262	-1.14466	0.442186	0.977643	0.452298		9	9	9	17.9	17.9	17.9	73.457	22.709	4886900	25	6	2	4	4	2	3	6	2	4	4	2	3	6	2	4	4	2	3	11.7	3.7	8.2
O75400	Pre-mRNA-processing factor 40 homolog A	PRPF40A	18.9122	18.4117	18.662	20.4881	19.3113	19.8997	20.5137	19.2177	19.8657	-1.23775	-0.03398	-1.20377	0.424035	0.976722	0.434141		13	13	13	15.9	15.9	15.9	108.8	22.425	6493000	24	0	2	3	4	8	3	0	2	3	4	8	3	0	2	3	4	8	3	0	2.5	2.7
O60762	Dolichol-phosphate mannosyltransferase subunit 1	DPM1	17.7118	18.8342	18.273	20.3138	19.8944	20.1041	19.6723	19.6138	19.6431	-1.83114	-0.461035	-1.3701	0.281042	0.726465	0.386863		6	6	6	31.9	31.9	31.9	29.634	14.69	3134800	16	1	1	3	2	3	4	1	1	3	2	3	4	1	1	3	2	3	4	4.2	4.2	14.6
O00429	Dynamin-1-like protein	DNM1L	17.4258	18.2059	17.8158	19.9065	19.0163	19.4614	19.6574	19.7389	19.6981	-1.6456	0.236715	-1.88231	0.319615	1.17831	0.271249		11	11	11	19.6	19.6	19.6	81.876	85.802	6127700	28	2	1	4	2	7	5	2	1	4	2	7	5	2	1	4	2	7	5	2.9	1.4	5.3
O14828	Secretory carrier-associated membrane protein 3	SCAMP3	18.9634	18.6242	18.7938	20.0909	19.0596	19.5753	20.7639	19.5519	20.1579	-0.78144	0.58261	-1.36405	0.581786	1.49756	0.38849		6	6	6	23.3	23.3	23.3	38.287	145.05	3514600	17	1	1	3	2	6	2	1	1	3	2	6	2	1	1	3	2	6	2	4.6	4.6	13
Q9Y3Q3	Transmembrane emp24 domain-containing protein 3	TMED3	18.4542	19.6924	19.0733	19.9944	19.3891	19.6917	20.2707	20.3308	20.3008	-0.61843	0.60901	-1.22744	0.651379	1.52521	0.427075		3	3	3	18	18	18	24.777	4.5	1393000	8	0	0	2	0	3	3	0	0	2	0	3	3	0	0	2	0	3	3	0	0	10.1
Q9UG63	ATP-binding cassette sub-family F member 2	ABCF2	17.7933	20.4423	19.1178	20.5223	18.7019	19.6121	19.4681	19.7918	19.63	-0.494305	0.017865	-0.51217	0.709904	1.01246	0.701167		8	8	8	13.8	13.8	13.8	71.289	21.687	6796500	17	2	4	3	3	0	2	2	4	3	3	0	2	2	4	3	3	0	2	4.2	6.1	5
Q8NCA5	Protein FAM98A	FAM98A	18.1678	20.6199	19.3938	19.9557	19.5994	19.7776	20.1882	19.9523	20.0703	-0.383755	0.29269	-0.676445	0.76644	1.22492	0.625705		4	4	4	9.8	9.8	9.8	55.4	60.078	6277500	22	2	2	2	2	4	3	2	2	2	2	4	3	2	2	2	2	4	3	5.2	5.6	5.6
Q8N6M0	OTU domain-containing protein 6B	OTUD6B	17.9557	19.1422	18.5489	21.1695	18.8714	20.0204	20.3008	20.2459	20.2734	-1.47151	0.25291	-1.72442	0.360606	1.19161	0.302621		4	4	4	20.1	20.1	20.1	33.812	56.393	7643400	15	2	1	2	1	3	2	2	1	2	1	3	2	2	1	2	1	3	2	7.8	4.4	7.2
Q14498	RNA-binding protein 39	RBM39	18.8279	19.5476	19.1877	20.6905	19.6897	20.1901	20.1392	19.7244	19.9318	-1.00236	-0.258305	-0.74405	0.499184	0.83607	0.597061		6	6	6	15.1	15.1	15.1	59.379	30.532	5577000	24	1	1	3	5	2	3	1	1	3	5	2	3	1	1	3	5	2	3	2.1	2.1	6.8
P40938	Replication factor C subunit 3	RFC3	18.6071	19.6366	19.1218	20.2461	18.9819	19.614	19.979	19.5366	19.7578	-0.492155	0.143815	-0.63597	0.710962	1.10482	0.643508		8	8	8	32	32	32	40.556	68.455	4344700	19	1	2	3	1	6	4	1	2	3	1	6	4	1	2	3	1	6	4	3.9	6.7	10.7
Q01970	1-phosphatidylinositol 4,5-bisphosphate phosphodiesterase beta-3	PLCB3	17.555	19.3854	18.4702	19.908	19.2227	19.5654	20.9886	20.3951	20.6919	-1.09514	1.12651	-2.22165	0.468089	2.1833	0.214395		15	15	15	17	17	17	138.8	99.345	4483100	28	0	0	5	3	13	7	0	0	5	3	13	7	0	0	5	3	13	7	0	0	5.8
Q9P2M7	Cingulin	CGN	18.7889	18.8757	18.8323	19.6122	18.0358	18.824	19.8906	19.8566	19.8736	0.008305	1.04959	-1.04128	1.00577	2.06994	0.485894		11	11	11	12.1	12.1	12.1	136.38	26.807	3843100	28	2	1	3	1	9	6	2	1	3	1	9	6	2	1	3	1	9	6	1.4	0.8	2.9
Q9H2U1	ATP-dependent RNA helicase DHX36	DHX36	19.7058	18.339	19.0224	20.3415	18.5674	19.4544	19.3652	20.0832	19.7242	-0.43202	0.269765	-0.701785	0.741223	1.20561	0.614811		12	12	12	14.2	14.2	14.2	114.76	70.502	5001200	39	4	0	4	1	8	8	4	0	4	1	8	8	4	0	4	1	8	8	4	0	4
Q9H1Y0	Autophagy protein 5	ATG5	18.1047	18.4742	18.2894	19.1915	18.1576	18.6746	18.8261	19.6532	19.2396	-0.38514	0.56508	-0.95022	0.765705	1.47947	0.517554		2	2	2	7.6	7.6	7.6	32.447	5.2844	2545500	9	2	2	2	1	0	1	2	2	2	1	0	1	2	2	2	1	0	1	7.6	7.6	7.6
Q5W0V3	Protein FAM160B1	FAM160B1	19.6592	19.0589	19.3591	20.1063	18.2941	19.2002	20.109	19.7159	19.9125	0.15886	0.712285	-0.553425	1.1164	1.6384	0.681401		9	9	8	15.3	15.3	14.1	86.557	34.554	5040200	22	5	1	1	0	9	4	5	1	1	0	9	4	4	1	1	0	8	4	7.1	1.8	1.3
Q13442	28 kDa heat- and acid-stable phosphoprotein	PDAP1	18.6536	18.9597	18.8067	20.3084	18.805	19.5567	18.9891	20.4062	19.6977	-0.750025	0.14098	-0.891005	0.594593	1.10265	0.539238		5	5	5	26.5	26.5	26.5	20.63	15.069	1619300	12	0	0	3	1	4	3	0	0	3	1	4	3	0	0	3	1	4	3	0	0	21.5
O15020	Spectrin beta chain, non-erythrocytic 2	SPTBN2	19.2694	19.028	19.1487	19.7726	17.7358	18.7542	19.3956	20.0109	19.7032	0.394435	0.948975	-0.55454	1.31443	1.9305	0.680874		28	21	21	16.8	13.5	13.5	271.32	77.218	5656700	33	3	4	2	2	15	16	2	4	2	1	10	12	2	4	2	1	10	12	2.1	2.2	1.1
Q00653	Nuclear factor NF-kappa-B p100 subunit;Nuclear factor NF-kappa-B p52 subunit	NFKB2	19.1351	18.7187	18.9269	19.8494	19.3932	19.6213	19.865	20.2712	20.0681	-0.69441	0.44676	-1.14117	0.617962	1.36298	0.453392		11	11	11	17.9	17.9	17.9	96.748	37.017	5657300	34	4	1	3	2	5	8	4	1	3	2	5	8	4	1	3	2	5	8	6.7	1.6	4.4
Q9Y5S2;Q5VT25	Serine/threonine-protein kinase MRCK beta	CDC42BPB	19.8662	18.6031	19.2346	17.9377	18.4222	18.18	19.4659	20.8354	20.1506	1.05465	1.97067	-0.91603	2.07721	3.91951	0.529965		12	12	10	8.7	8.7	7.5	194.31	44.478	6885400	22	3	1	1	0	4	11	3	1	1	0	4	11	2	0	1	0	3	9	1.6	0.5	0.4
Q9Y3B2	Exosome complex component CSL4	EXOSC1	19.2665	17.696	18.4812	18.9015	19.3201	19.1108	20.6494	19.6177	20.1335	-0.6296	1.0227	-1.6523	0.646356	2.03171	0.318134		5	5	5	35.9	35.9	35.9	21.452	95.861	2108200	17	2	1	1	2	5	2	2	1	1	2	5	2	2	1	1	2	5	2	16.9	8.2	8.2
Q9NRY4	Rho GTPase-activating protein 35	ARHGAP35	18.5862	18.7861	18.6862	18.5683	18.5722	18.5703	20.3728	20.5954	20.4841	0.11591	1.91385	-1.79794	1.08366	3.76815	0.287584		18	18	18	16.1	16.1	16.1	170.51	37.311	3554600	29	4	1	1	1	11	10	4	1	1	1	11	10	4	1	1	1	11	10	3.5	0.7	0.9
Q9BSD7	Cancer-related nucleoside-triphosphatase	NTPCR	19.4107	18.2187	18.8147	18.5318	19.2858	18.9088	21.1975	19.478	20.3378	-0.09406	1.42899	-1.52305	0.936882	2.69258	0.34795		6	6	6	48.4	48.4	48.4	20.713	15.166	2185100	15	2	0	0	2	5	2	2	0	0	2	5	2	2	0	0	2	5	2	17.4	0	0
Q99575	Ribonucleases P/MRP protein subunit POP1	POP1	19.2542	18.5569	18.9056	18.6314	19.4666	19.049	20.9219	19.4981	20.21	-0.14342	1.161	-1.30442	0.90537	2.23612	0.404884		14	14	14	20.1	20.1	20.1	114.71	27.516	4833000	25	4	2	2	3	10	1	4	2	2	3	10	1	4	2	2	3	10	1	4.5	1.7	2.4
Q96GD0	Pyridoxal phosphate phosphatase	PDXP	19.7826	18.3103	19.0465	18.7678	19.7215	19.2447	19.6711	19.8371	19.7541	-0.198205	0.50944	-0.707645	0.871634	1.4235	0.612319		3	3	3	14.9	14.9	14.9	31.698	11.762	4846800	11	3	1	1	2	2	0	3	1	1	2	2	0	3	1	1	2	2	0	14.9	4.7	4.7
Q969Z0	Protein TBRG4	TBRG4	19.5639	19.0594	19.3117	18.2585	19.8478	19.0531	20.3891	20.187	20.2881	0.258545	1.23494	-0.97639	1.19627	2.35371	0.50825		4	4	4	9.2	9.2	9.2	70.737	18.513	4149900	9	3	0	0	0	3	3	3	0	0	0	3	3	3	0	0	0	3	3	6.3	0	0
Q7Z4H3	HD domain-containing protein 2	HDDC2	19.6314	18.7607	19.196	18.4836	18.9422	18.7129	20.1952	20.1954	20.1953	0.483105	1.48242	-0.99931	1.39775	2.79416	0.500239		5	5	5	29.4	29.4	29.4	23.39	15.462	6233400	19	2	1	2	1	4	3	2	1	2	1	4	3	2	1	2	1	4	3	9.8	6.4	11.8
Q13057	Bifunctional coenzyme A synthase;Phosphopantetheine adenylyltransferase;Dephospho-CoA kinase	COASY	18.7534	17.5497	18.1516	19.0478	19.7694	19.4086	20.3467	20.0858	20.2162	-1.25704	0.80762	-2.06466	0.418402	1.75032	0.239043		8	8	8	18.6	18.6	18.6	62.328	18.303	6387300	19	5	2	1	4	4	2	5	2	1	4	4	2	5	2	1	4	4	2	13.7	3.7	2
P46934	E3 ubiquitin-protein ligase NEDD4	NEDD4	19.6099	18.0581	18.834	17.9905	18.2739	18.1322	20.2205	20.4211	20.3208	0.7018	2.18858	-1.48678	1.62653	4.55857	0.356808		9	9	8	10.1	10.1	9.3	149.11	29.304	4474600	17	3	1	1	0	6	5	3	1	1	0	6	5	2	0	0	0	5	4	2.9	0.8	0.8
P40763	Signal transducer and activator of transcription 3	STAT3	19.3003	19.0652	19.1827	18.0869	18.7409	18.4139	20.5354	20.5991	20.5672	0.768855	2.15337	-1.38451	1.70392	4.44864	0.38302		12	12	12	20.9	20.9	20.9	88.067	83.324	5834500	19	5	1	2	3	5	4	5	1	2	3	5	4	5	1	2	3	5	4	7	1.4	5.6
O75391	Sperm-associated antigen 7	SPAG7	19.128	17.9414	18.5347	19.1924	19.976	19.5842	19.5695	20.2447	19.9071	-1.0495	0.322905	-1.3724	0.483137	1.25085	0.386248		2	2	2	11.5	11.5	11.5	26.034	4.546	2216400	11	2	0	2	2	1	1	2	0	2	2	1	1	2	0	2	2	1	1	11.5	0	11.5
O60678	Protein arginine N-methyltransferase 3	PRMT3	18.8314	18.1466	18.489	18.1821	19.4723	18.8272	20.0094	19.2598	19.6346	-0.338205	0.807365	-1.14557	0.791025	1.75001	0.452011		4	4	4	8.9	8.9	8.9	59.875	11.413	5270300	12	3	1	1	0	3	2	3	1	1	0	3	2	3	1	1	0	3	2	6.6	1.9	1.9
O15127	Secretory carrier-associated membrane protein 2	SCAMP2	19.2363	19.1388	19.1876	19.039	18.9195	18.9792	20.7034	20.7968	20.7501	0.208355	1.77089	-1.56254	1.15537	3.41264	0.338556		4	4	4	16.1	16.1	16.1	36.648	126.82	4030400	15	2	3	1	0	3	3	2	3	1	0	3	3	2	3	1	0	3	3	7.6	12.2	4
O60306	Intron-binding protein aquarius	AQR	18.9216	18.9607	18.9411	18.1328	19.2141	18.6734	21.0607	19.789	20.4248	0.267675	1.7514	-1.48373	1.20387	3.36686	0.357563		16	16	16	13.2	13.2	13.2	171.29	46.907	2597400	23	0	2	1	0	12	8	0	2	1	0	12	8	0	2	1	0	12	8	0	1.8	0.9
Q9BRQ8	Apoptosis-inducing factor 2	AIFM2	19.5984	19.8963	19.7474	18.0517	18.3079	18.1798	19.3569	19.6605	19.5087	1.56758	1.32887	0.238705	2.96406	2.51206	1.17993	+	5	5	5	18.2	18.2	18.2	40.526	24.918	3308900	16	2	2	1	2	4	4	2	2	1	2	4	4	2	2	1	2	4	4	7.2	7.2	3.5
Q99523	Sortilin	SORT1	19.1182	18.5771	18.8477	18.7989	19.004	18.9014	19.8803	18.5708	19.2255	-0.05375	0.324125	-0.377875	0.963429	1.2519	0.76957		6	6	6	9.1	9.1	9.1	92.067	36.634	4758700	15	4	2	2	2	2	2	4	2	2	2	2	2	4	2	2	2	2	2	6.5	3.5	3.5
Q8N6T3	ADP-ribosylation factor GTPase-activating protein 1	ARFGAP1	19.2786	18.3758	18.8272	18.8988	18.6002	18.7495	19.7105	18.8758	19.2931	0.077715	0.543645	-0.46593	1.05535	1.45765	0.724004		6	6	6	17	17	17	44.667	11.957	2742600	18	1	2	4	2	3	2	1	2	4	2	3	2	1	2	4	2	3	2	2	2.5	9.6
A2RTX5	Probable threonine--tRNA ligase 2, cytoplasmic	TARSL2	18.758	18.6936	18.7258	18.597	19.3531	18.9751	19.4857	18.7877	19.1367	-0.249305	0.161615	-0.41092	0.841302	1.11854	0.752144		7	4	4	11.2	7.2	7.2	92.644	15.588	2774700	8	5	3	1	4	3	3	3	2	0	2	1	0	3	2	0	2	1	0	6.5	3.9	1
P50748	Kinetochore-associated protein 1	KNTC1	19.0969	18.7272	18.9121	17.9762	18.8009	18.3886	19.0656	18.7762	18.9209	0.52351	0.532325	-0.008815	1.43745	1.44626	0.993909		15	15	15	8.9	8.9	8.9	250.75	45.662	3145200	23	0	4	1	4	10	4	0	4	1	4	10	4	0	4	1	4	10	4	0	2.3	0.5
Q9Y3D8	Adenylate kinase isoenzyme 6	AK6	21.5032	19.3409	20.422	18.8975	19.6018	19.2497	18.9497	20.237	19.5934	1.17236	0.343715	0.82864	2.25379	1.26902	1.77601		3	3	3	19.8	19.8	19.8	20.061	10.733	3972900	13	2	1	1	2	1	2	2	1	1	2	1	2	2	1	1	2	1	2	10.5	5.2	5.2
Q9Y2T2	AP-3 complex subunit mu-1	AP3M1	19.8574	20.1425	19.9999	18.8902	20.7083	19.7993	19.2221	19.521	19.3715	0.200695	-0.42772	0.628415	1.14925	0.743436	1.54587		7	7	7	24.9	24.9	24.9	46.939	11.819	8580800	19	4	2	3	2	2	2	4	2	3	2	2	2	4	2	3	2	2	2	11	5.3	7.2
Q9UP83	Conserved oligomeric Golgi complex subunit 5	COG5	20.1209	20.3484	20.2346	18.4806	19.8624	19.1715	20.1751	20.3537	20.2644	1.06311	1.09287	-0.02977	2.08942	2.13299	0.979576		8	8	8	10	10	10	92.742	12.62	6478400	19	4	3	2	3	4	3	4	3	2	3	4	3	4	3	2	3	4	3	5	3.7	2.5
Q9ULT8	E3 ubiquitin-protein ligase HECTD1	HECTD1	19.8026	19.6013	19.702	17.9332	19.5806	18.7569	20.1802	20.8465	20.5134	0.94505	1.75648	-0.811425	1.92526	3.37872	0.569819		20	20	20	9.8	9.8	9.8	289.38	51.045	5432600	35	5	2	1	4	9	11	5	2	1	4	9	11	5	2	1	4	9	11	2.5	0.7	0.7
Q8IV38	Ankyrin repeat and MYND domain-containing protein 2	ANKMY2	20.0402	19.3466	19.6934	18.1502	20.6165	19.3833	19.9674	19.6119	19.7896	0.31005	0.40632	-0.09627	1.23975	1.3253	0.935448		4	4	4	10.4	10.4	10.4	49.298	11.005	6759300	9	2	0	2	3	0	2	2	0	2	3	0	2	2	0	2	3	0	2	5.4	0	5
Q53FT3	Protein Hikeshi	C11orf73	20.5342	19.6996	20.1169	18.6373	20.2248	19.431	20.3581	20.1444	20.2513	0.68589	0.82023	-0.13434	1.60869	1.76569	0.911087		5	5	5	24.4	24.4	24.4	21.627	12.938	2898500	22	2	1	1	3	5	2	2	1	1	3	5	2	2	1	1	3	5	2	11.2	6.6	6.6
Q27J81	Inverted formin-2	INF2	20.5435	19.9906	20.2671	19.5854	19.5003	19.5428	20.6688	20.6504	20.6596	0.724265	1.11682	-0.39256	1.65206	2.16869	0.761777		21	21	21	21.9	21.9	21.9	135.62	144.05	8420100	50	5	5	3	5	12	9	5	5	3	5	12	9	5	5	3	5	12	9	5.9	5.6	3.4
O75843	AP-1 complex subunit gamma-like 2	AP1G2	20.1136	20.4462	20.2799	19.3712	20.4693	19.9203	19.9845	20.1706	20.0776	0.35964	0.157315	0.202325	1.28311	1.11521	1.15055		9	9	9	12.4	12.4	12.4	87.116	18.511	13634000	27	5	5	3	5	4	2	5	5	3	5	4	2	5	5	3	5	4	2	6.9	6	3.9
Q13033	Striatin-3	STRN3	19.8767	20.6439	20.2603	18.8803	19.2792	19.0798	18.358	20.6773	19.5176	1.18057	0.437865	0.7427	2.26666	1.3546	1.6733		4	4	3	6.1	6.1	4.9	87.208	12.031	6582200	9	3	3	3	2	0	0	3	3	3	2	0	0	2	3	3	2	0	0	4.5	4.9	4.9
Q9UIQ6	Leucyl-cystinyl aminopeptidase;Leucyl-cystinyl aminopeptidase, pregnancy serum form	LNPEP	18.7358	19.6068	19.1713	18.801	19.5186	19.1598	19.6125	19.2207	19.4166	0.011535	0.25683	-0.245295	1.00803	1.19485	0.843643		13	13	13	14.1	14.1	14.1	117.35	32.585	3108800	23	2	4	3	3	7	3	2	4	3	3	7	3	2	4	3	3	7	3	2	4.3	3.4
Q99615	DnaJ homolog subfamily C member 7	DNAJC7	19.4069	19.6355	19.5212	18.0118	19.6337	18.8228	20.0477	19.4635	19.7556	0.698425	0.93282	-0.234395	1.62273	1.909	0.850041		9	9	9	23.1	23.1	23.1	56.44	45.699	6700400	20	4	2	3	3	5	4	4	2	3	3	5	4	4	2	3	3	5	4	9.3	4.9	7.7
Q96K76	Ubiquitin carboxyl-terminal hydrolase 47	USP47	18.9332	20.712	19.8226	18.8711	19.4642	19.1677	20.1755	20.0491	20.1123	0.654885	0.944615	-0.28973	1.57449	1.92468	0.818055		14	14	14	12.4	12.4	12.4	157.31	35.923	4383800	25	0	4	1	2	11	7	0	4	1	2	11	7	0	4	1	2	11	7	0	3.6	0.9
Q8WTV0	Scavenger receptor class B member 1	SCARB1	18.7674	19.5592	19.1633	18.7141	20.3238	19.5189	20.1407	18.944	19.5423	-0.355585	0.023395	-0.37898	0.781553	1.01635	0.768981		3	3	3	5.8	5.8	5.8	60.877	7.333	5297800	8	2	2	2	2	0	0	2	2	2	2	0	0	2	2	2	2	0	0	3.6	3.6	3.6
Q6P1A2	Lysophospholipid acyltransferase 5	LPCAT3	19.5815	19.5885	19.585	18.9385	20.0352	19.4869	19.8867	19.465	19.6759	0.098125	0.18899	-0.090865	1.07038	1.13997	0.93896		3	3	3	7.2	7.2	7.2	56.034	4.0581	3823100	9	3	3	1	2	0	0	3	3	1	2	0	0	3	3	1	2	0	0	7.2	7.2	2.1
Q2M389	WASH complex subunit 7	KIAA1033	19.8613	20.5086	20.185	17.8535	20.1677	19.0106	21.3891	18.2711	19.8301	1.17441	0.819495	0.35491	2.257	1.76479	1.27891		11	11	11	10.5	10.5	10.5	136.4	49.936	7654500	22	2	2	1	3	10	0	2	2	1	3	10	0	2	2	1	3	10	0	1.4	1.4	0.9
Q14CX7	N-alpha-acetyltransferase 25, NatB auxiliary subunit	NAA25	17.71	19.6737	18.6919	19.5343	20.2985	19.9164	20.0463	18.7478	19.3971	-1.22451	-0.5193	-0.705205	0.427944	0.69771	0.613355		16	16	16	21.8	21.8	21.8	112.29	47.166	6823800	28	2	2	3	5	8	4	2	2	3	5	8	4	2	2	3	5	8	4	2.5	2.5	3
Q14839;Q8TDI0	Chromodomain-helicase-DNA-binding protein 4	CHD4	18.67	19.3811	19.0255	18.6024	19.4697	19.036	20.1245	19.9788	20.0517	-0.010525	1.01564	-1.02616	0.992731	2.0218	0.491014		20	20	15	13.2	13.2	9.7	218	46.227	4784900	31	0	0	4	2	13	8	0	0	4	2	13	8	0	0	4	2	9	7	0	0	2.1
A5YKK6	CCR4-NOT transcription complex subunit 1	CNOT1	19.0744	19.6148	19.3446	18.8704	19.975	19.4227	19.6482	19.3699	19.5091	-0.078105	0.086375	-0.16448	0.947301	1.0617	0.89225		16	16	16	7.6	7.6	7.6	266.94	52.366	5485800	37	3	6	2	6	10	8	3	6	2	6	10	8	3	6	2	6	10	8	1.3	2.9	0.9
P84090	Enhancer of rudimentary homolog	ERH	19.3032	20.5393	19.9213	18.6986	20.6378	19.6682	20.561	18.3687	19.4649	0.253095	-0.203285	0.45638	1.19176	0.868571	1.37209		2	2	2	26.9	26.9	26.9	12.259	20.02	2418000	14	2	2	1	2	2	0	2	2	1	2	2	0	2	2	1	2	2	0	26.9	26.9	10.6
Q92544	Transmembrane 9 superfamily member 4	TM9SF4	19.6186	19.6184	19.6185	19.9897	20.268	20.1288	20.0589	17.5441	18.8015	-0.510335	-1.32731	0.816975	0.702059	0.398511	1.76171		5	5	5	9.2	9.2	9.2	74.518	6.9425	4206800	13	3	1	3	3	1	1	3	1	3	3	1	1	3	1	3	3	1	1	5	1.4	5
Q6YP21	Kynurenine--oxoglutarate transaminase 3	CCBL2	19.4815	19.6029	19.5422	19.8386	20.0538	19.9462	19.7997	18.6364	19.218	-0.404005	-0.72816	0.324155	0.755757	0.603673	1.25193		6	6	6	15.9	15.9	15.9	51.4	14.614	5598700	15	6	2	3	2	0	0	6	2	3	2	0	0	6	2	3	2	0	0	15.9	5.9	8.6
Q5T447	E3 ubiquitin-protein ligase HECTD3	HECTD3	18.3581	19.4376	18.8979	20.0406	19.9326	19.9866	19.6181	18.3552	18.9867	-1.08872	-0.9999	-0.088815	0.47018	0.500035	0.940295		11	11	11	16.4	16.4	16.4	97.112	21.729	5523500	18	2	1	4	3	8	1	2	1	4	3	8	1	2	1	4	3	8	1	3.1	1.3	4.5
Q32P44	Echinoderm microtubule-associated protein-like 3	EML3	19.5832	20.454	20.0186	19.6161	19.2308	19.4235	20.1773	18.7144	19.4458	0.595145	0.022385	0.57276	1.51062	1.01564	1.48737		11	11	11	18.6	18.6	18.6	95.196	89.936	5508600	28	5	4	2	3	9	2	5	4	2	3	9	2	5	4	2	3	9	2	6.6	6.4	2.8
Q08752	Peptidyl-prolyl cis-trans isomerase D	PPID	18.4777	20.2198	19.3487	20.1007	19.3844	19.7425	20.12	18.5208	19.3204	-0.39383	-0.422125	0.028295	0.761106	0.746325	1.01981		9	9	9	29.2	29.2	29.2	40.763	21.33	4323900	19	0	3	3	1	6	4	0	3	3	1	6	4	0	3	3	1	6	4	0	7.6	7.8
P50895	Basal cell adhesion molecule	BCAM	19.6407	19.8144	19.7276	20.361	19.9522	20.1566	19.8927	17.907	18.8999	-0.42902	-1.25675	0.82773	0.742766	0.418486	1.77489		6	6	6	12.9	12.9	12.9	67.404	20.094	6761300	25	4	3	4	5	0	0	4	3	4	5	0	0	4	3	4	5	0	0	9.1	5.9	8.9
P41214	Eukaryotic translation initiation factor 2D	EIF2D	19.4498	19.3867	19.4182	19.2848	19.1213	19.2031	20.3252	18.7947	19.56	0.215165	0.35687	-0.141705	1.16084	1.28064	0.906447		6	6	6	16.6	16.6	16.6	64.706	15.777	3199900	21	2	1	3	2	4	2	2	1	3	2	4	2	2	1	3	2	4	2	4.5	2.1	6.5
O15126	Secretory carrier-associated membrane protein 1	SCAMP1	19.7202	19.5602	19.6402	19.7993	20.2665	20.0329	20.438	17.6484	19.0432	-0.392735	-0.989755	0.59702	0.761684	0.503563	1.51259		3	3	3	14.2	14.2	14.2	37.92	31.831	3575600	11	2	2	2	1	2	0	2	2	2	1	2	0	2	2	2	1	2	0	10.7	10.7	10.7
O75312	Zinc finger protein ZPR1	ZPR1	18.8253	20.789	19.8072	20.3546	19.4672	19.9109	20.0115	18.8622	19.4369	-0.103695	-0.47399	0.370295	0.930646	0.719971	1.29262		8	8	8	19.8	19.8	19.8	50.925	85.352	6431100	21	4	1	4	3	3	3	4	1	4	3	3	3	4	1	4	3	3	3	10.2	2.4	10.9
Q9UBS8	E3 ubiquitin-protein ligase RNF14	RNF14	19.3186	19.0075	19.1631	19.6429	18.8067	19.2248	19.2339	17.9689	18.6014	-0.061685	-0.623345	0.56166	0.958144	0.649164	1.47597		4	4	4	9.5	9.5	9.5	53.837	8.5313	2111200	9	3	3	1	3	0	1	3	3	1	3	0	1	3	3	1	3	0	1	6.8	7.4	2.3
Q9NZD8	Maspardin	SPG21	20.2665	18.6511	19.4588	19.7888	18.7825	19.2856	20.253	18.0388	19.1459	0.173135	-0.13972	0.312855	1.12751	0.907695	1.24216		5	5	5	18.2	18.2	18.2	34.96	25.544	5387800	10	4	1	2	1	4	0	4	1	2	1	4	0	4	1	2	1	4	0	15.3	3.2	8.4
Q15031	Probable leucine--tRNA ligase, mitochondrial	LARS2	19.6618	19.5868	19.6243	19.9596	19.9402	19.9499	19.0822	17.3699	18.2261	-0.325585	-1.72384	1.39825	0.797975	0.302743	2.63582	+	4	4	4	4.3	4.3	4.3	101.97	5.051	6224500	10	2	2	3	3	0	0	2	2	3	3	0	0	2	2	3	3	0	0	2.2	2.2	3.2
Q9NQE9	Histidine triad nucleotide-binding protein 3	HINT3	20.1754	19.5822	19.8788	19.5126	19.2029	19.3577	19.2397	17.8469	18.5433	0.52106	-0.814435	1.3355	1.43501	0.568631	2.52362		2	2	2	11	11	11	20.361	7.4744	1510900	11	2	2	2	2	1	1	2	2	2	2	1	1	2	2	2	2	1	1	11	11	11
Q9UPY3	Endoribonuclease Dicer	DICER1	20.4274	19.3669	19.8971	19.9888	19.3516	19.6702	19.2063	18.8193	19.0128	0.226905	-0.657375	0.88428	1.17032	0.634031	1.84584		14	14	14	9.3	9.3	9.3	218.68	31.263	3474200	27	1	1	5	5	9	2	1	1	5	5	9	2	1	1	5	5	9	2	0.5	0.7	3.2
Q9UPN9	E3 ubiquitin-protein ligase TRIM33	TRIM33	20.0401	19.8986	19.9693	19.3092	19.1636	19.2364	19.7435	19.2176	19.4806	0.73293	0.244145	0.488785	1.66201	1.18439	1.40326	+	9	9	9	8.8	8.8	8.8	122.53	29.621	6352700	29	5	1	3	2	6	2	5	1	3	2	6	2	5	1	3	2	6	2	5.3	1	2.8
Q9UFN0;Q9BS92	Protein NipSnap homolog 3A	NIPSNAP3A	20.444	19.396	19.92	19.0012	18.8193	18.9102	19.0468	18.5434	18.7951	1.00971	-0.11515	1.12486	2.01351	0.923286	2.18081		5	5	5	25.5	25.5	25.5	28.466	14.811	2690300	15	3	1	2	2	2	1	3	1	2	2	2	1	3	1	2	2	2	1	13.4	4	6.9
Q9UBF2	Coatomer subunit gamma-2	COPG2	20.417	20.5051	20.4611	20.1862	19.1772	19.6817	18.8432	19.5344	19.1888	0.779375	-0.492875	1.27225	1.71639	0.710608	2.41538		19	15	15	26.4	22.7	22.7	97.621	88.401	11099000	34	10	2	7	3	10	9	7	2	5	1	7	6	7	2	5	1	7	6	14.4	3	9.2
Q9BTY2	Plasma alpha-L-fucosidase	FUCA2	20.7091	20.9046	20.8069	19.8277	18.7594	19.2935	18.6871	18.871	18.7791	1.51332	-0.514495	2.02781	2.85465	0.700038	4.07785		4	4	4	8.6	8.6	8.6	54.066	6.9418	8497200	9	4	2	2	1	0	0	4	2	2	1	0	0	4	2	2	1	0	0	8.6	4.7	4.5
Q96SU4	Oxysterol-binding protein-related protein 9	OSBPL9	20.2261	19.8032	20.0147	19.5783	18.0585	18.8184	19.4978	18.5967	19.0472	1.19625	0.228835	0.96741	2.29142	1.17189	1.95533		5	5	5	9.1	9.1	9.1	83.184	15.983	6626500	15	4	2	2	0	1	2	4	2	2	0	1	2	4	2	2	0	1	2	6.8	3.3	3.3
Q93050	V-type proton ATPase 116 kDa subunit a isoform 1	ATP6V0A1	19.903	19.7343	19.8186	20.0759	19.1188	19.5974	19.2606	19.177	19.2188	0.221275	-0.378575	0.59985	1.16576	0.769197	1.51556		6	6	5	8.7	8.7	7.8	96.412	37.751	5139700	24	3	5	2	3	3	1	3	5	2	3	3	1	3	4	2	2	3	1	4.3	7.4	3
Q6PI48	Aspartate--tRNA ligase, mitochondrial	DARS2	19.8681	20.4649	20.1665	18.8484	17.5974	18.2229	19.6329	19.1871	19.41	1.94359	1.18708	0.75652	3.84663	2.27691	1.68941		9	9	9	17.5	17.5	17.5	73.562	16.909	10524000	17	4	3	1	3	2	4	4	3	1	3	2	4	4	3	1	3	2	4	8.5	4.3	1.9
Q5T750	Skin-specific protein 32	XP32	20.8026	20.0407	20.4216	20.12	18.6008	19.3604	19.991	17.7904	18.8907	1.06125	-0.469675	1.53093	2.08675	0.722127	2.88972		3	3	3	13.2	13.2	13.2	26.238	7.1107	3057600	17	3	2	3	1	0	0	3	2	3	1	0	0	3	2	3	1	0	0	13.2	9.2	13.2
Q13619	Cullin-4A	CUL4A	20.735	19.4238	20.0794	18.9804	18.7935	18.8869	20.438	18.9489	19.6934	1.19244	0.806505	0.38594	2.2854	1.74897	1.30671		18	10	10	27.5	18.2	18.2	87.679	22.753	7704300	17	6	4	4	2	12	5	4	3	1	0	7	1	4	3	1	0	7	1	9.4	5.5	5.5
P52789	Hexokinase-2	HK2	20.5883	20.3732	20.4807	20.4308	18.4241	19.4274	18.9877	18.6138	18.8007	1.05328	-0.6267	1.67998	2.07524	0.647656	3.20424		13	10	10	16.6	13.2	13.2	102.38	18.653	9326100	21	9	7	7	4	2	3	7	5	5	1	1	1	7	5	5	1	1	1	11.8	9.6	8.9
Q12955	Ankyrin-3	ANK3	20.2763	20.6887	20.4825	19.6269	18.3525	18.9897	18.0539	18.6631	18.3585	1.49281	-0.63117	2.12398	2.81436	0.645653	4.35893		7	7	6	2	2	1.7	480.4	34.617	6327300	18	3	4	3	2	1	1	3	4	3	2	1	1	2	3	2	2	1	1	1.1	0.9	0.9
Q9H6Z4	Ran-binding protein 3	RANBP3	19.0173	20.7146	19.8659	18.8835	19.4092	19.1463	18.9833	17.9886	18.4859	0.71961	-0.660405	1.38002	1.64674	0.632701	2.60271		3	3	3	6.2	6.2	6.2	60.209	13.272	1300900	12	2	3	2	2	0	0	2	3	2	2	0	0	2	3	2	2	0	0	4.1	6.2	4.8
Q99836	Myeloid differentiation primary response protein MyD88	MYD88	19.5339	19.8613	19.6976	18.7425	18.9902	18.8664	19.2156	19.101	19.1583	0.83123	0.291925	0.539305	1.7792	1.22427	1.45327		5	5	5	23	23	23	33.233	16.109	1572400	10	2	1	0	1	2	4	2	1	0	1	2	4	2	1	0	1	2	4	6.4	2.7	0
Q96KG9	N-terminal kinase-like protein	SCYL1	20.2194	20.4618	20.3406	18.1039	19.0772	18.5906	19.5898	17.573	18.5814	1.75005	-0.009165	1.75921	3.36369	0.993667	3.38513		13	13	13	23.9	23.9	23.9	89.63	89.105	6842700	23	4	4	3	1	6	6	4	4	3	1	6	6	4	4	3	1	6	6	7.7	7.3	4.5
Q08380	Galectin-3-binding protein	LGALS3BP	20.7327	21.9047	21.3187	18.2444	18.9902	18.6173	19.3254	18.5747	18.95	2.70141	0.33272	2.36869	6.50437	1.25939	5.16472		4	4	4	8.4	8.4	8.4	65.33	10.483	12257000	19	3	4	1	3	0	0	3	4	1	3	0	0	3	4	1	3	0	0	6.7	8.4	1.7
P30039	Phenazine biosynthesis-like domain-containing protein	PBLD	19.5722	20.2196	19.8959	18.3635	19.4997	18.9316	18.9984	18.7614	18.8799	0.964255	-0.05172	1.01598	1.95106	0.964785	2.02227		5	5	5	28.8	28.8	28.8	31.785	27.41	3245500	13	3	2	2	2	2	0	3	2	2	2	2	0	3	2	2	2	2	0	12.5	10.1	11.5
O00442	RNA 3-terminal phosphate cyclase	RTCA	18.6996	20.137	19.4183	18.4814	18.7597	18.6205	19.163	18.9465	19.0548	0.79779	0.43426	0.36353	1.73844	1.35122	1.28657		3	3	3	10.1	10.1	10.1	39.336	33.928	4420000	11	3	1	2	1	2	2	3	1	2	1	2	2	3	1	2	1	2	2	10.1	3.6	6.3
O95793	Double-stranded RNA-binding protein Staufen homolog 1	STAU1	19.3544	19.9492	19.6518	18.8877	19.3648	19.1262	19.5315	18.0032	18.7673	0.525575	-0.358875	0.88445	1.43951	0.779772	1.84606		9	9	8	18.9	18.9	17.5	63.182	17.434	2849500	22	2	4	3	3	3	3	2	4	3	3	3	3	2	3	3	3	3	3	5.2	8.8	6.4
Q9NPJ3	Acyl-coenzyme A thioesterase 13;Acyl-coenzyme A thioesterase 13, N-terminally processed	ACOT13	24.8537	24.7762	24.8149	21.1736	22.606	21.8898	23.0525	18.4145	20.7335	2.92513	-1.15631	4.08144	7.5954	0.448657	16.9292		3	3	3	25	25	25	14.96	23.139	21275000	23	2	2	2	2	3	1	2	2	2	2	3	1	2	2	2	2	3	1	15.7	15.7	15.7
P13646	Keratin, type I cytoskeletal 13	KRT13	26.0963	23.287	24.6916	23.0788	22.4743	22.7765	21.5436	16.7144	19.129	1.91511	-3.64756	5.56267	3.77141	0.0797949	47.2638		23	15	11	50.2	36	28.8	49.588	203.27	87298000	70	22	13	13	9	11	8	15	8	7	4	4	1	11	6	5	2	1	0	46.7	25.5	23.1
P10253	Lysosomal alpha-glucosidase;76 kDa lysosomal alpha-glucosidase;70 kDa lysosomal alpha-glucosidase	GAA	23.9076	23.3849	23.6463	22.4152	22.3622	22.3887	21.3228	18.1958	19.7593	1.25756	-2.62939	3.88696	2.39092	0.161612	14.7942	+	11	11	11	13.1	13.1	13.1	105.32	55.564	55554000	68	10	6	5	4	3	0	10	6	5	4	3	0	10	6	5	4	3	0	12.1	7.6	6.1
O15347	High mobility group protein B3	HMGB3	24.451	24.7751	24.6131	18.7136	24.8279	21.7708	22.5269	17.9253	20.2261	2.8423	-1.54463	4.38694	7.17165	0.342782	20.9219		13	13	13	43.5	43.5	43.5	22.98	54.861	49795000	59	7	3	1	8	6	2	7	3	1	8	6	2	7	3	1	8	6	2	29.5	19.5	6.5
P07602	Prosaposin;Saposin-A;Saposin-B-Val;Saposin-B;Saposin-C;Saposin-D	PSAP	24.3722	23.3982	23.8852	22.4978	19.234	20.8659	22.6807	17.0214	19.8511	3.01929	-1.01485	4.03414	8.10771	0.494881	16.3831		8	8	8	15.6	15.6	15.6	58.112	13.96	14208000	28	6	2	3	1	5	1	6	2	3	1	5	1	6	2	3	1	5	1	10.3	3.8	5.2
P46926;Q8TDQ7	Glucosamine-6-phosphate isomerase 1	GNPDA1	23.3115	24.1537	23.7326	21.8085	23.2605	22.5345	23.635	19.5902	21.6126	1.19804	-0.921925	2.11996	2.29427	0.527804	4.34682		10	10	10	47.8	47.8	47.8	32.668	47.942	55938000	43	6	6	2	6	7	0	6	6	2	6	7	0	6	6	2	6	7	0	24.6	23.5	6.9
P19623	Spermidine synthase	SRM	25.0816	24.6977	24.8897	22.349	24.0882	23.2186	23.6149	19.4688	21.5419	1.67109	-1.67671	3.3478	3.18454	0.312794	10.1809		17	17	17	65.2	65.2	65.2	33.824	70.308	135470000	93	9	8	5	7	11	0	9	8	5	7	11	0	9	8	5	7	11	0	28.1	28.1	17.2
O00487	26S proteasome non-ATPase regulatory subunit 14	PSMD14	24.3705	25.0051	24.6878	21.9748	23.1743	22.5745	24.9034	19.7686	22.336	2.11327	-0.238525	2.3518	4.32672	0.847611	5.10461		10	10	10	53.5	53.5	53.5	34.577	57.578	106760000	62	5	3	2	3	9	2	5	3	2	3	9	2	5	3	2	3	9	2	21.3	11.6	9.4
P12429	Annexin A3	ANXA3	23.7487	24.8243	24.2865	21.6287	23.6985	22.6636	22.414	19.2329	20.8235	1.62291	-1.84012	3.46303	3.07997	0.2793	11.0275		15	15	15	46.1	46.1	46.1	36.375	103.76	70929000	63	11	10	6	10	5	0	11	10	6	10	5	0	11	10	6	10	5	0	37.8	35.6	20.1
Q9UKK9	ADP-sugar pyrophosphatase	NUDT5	24.4024	25.3508	24.8766	23.1776	24.6188	23.8982	25.0927	22.0144	23.5535	0.978395	-0.34471	1.3231	1.97027	0.787466	2.50204		15	15	15	64.8	64.8	64.8	24.327	145.53	174800000	110	12	6	6	9	11	7	12	6	6	9	11	7	12	6	6	9	11	7	50.7	25.6	32.4
Q9P2J5	Leucine--tRNA ligase, cytoplasmic	LARS	23.7839	24.4568	24.1203	24.0298	23.9005	23.9651	24.4045	21.1693	22.7869	0.155185	-1.17828	1.33346	1.11356	0.441878	2.52007		45	45	45	45.3	45.3	45.3	134.46	242.49	114710000	201	20	18	21	18	30	7	20	18	21	18	30	7	20	18	21	18	30	7	19.6	16.8	20
Q99426	Tubulin-folding cofactor B	TBCB	23.8839	25.0945	24.4892	24.2361	24.229	24.2326	24.8798	21.8822	23.381	0.256655	-0.851535	1.10819	1.19471	0.554195	2.15575		11	11	11	56.1	56.1	56.1	27.325	107.32	66838000	109	7	7	8	7	8	3	7	7	8	7	8	3	7	7	8	7	8	3	28.3	29.1	35.7
P45880	Voltage-dependent anion-selective channel protein 2	VDAC2	24.3399	24.3438	24.3418	23.4122	24.2196	23.8159	24.0706	21.3488	22.7097	0.525915	-1.10621	1.63213	1.43985	0.464511	3.0997		12	12	12	52.7	52.7	52.7	31.566	165.55	101040000	101	8	6	8	8	12	2	8	6	8	8	12	2	8	6	8	8	12	2	34.4	24.8	32
P21796	Voltage-dependent anion-selective channel protein 1	VDAC1	24.26	24.881	24.5705	24.0677	24.6011	24.3344	23.8499	21.1761	22.513	0.2361	-1.82136	2.05746	1.1778	0.282954	4.16253		14	14	14	62.2	62.2	62.2	30.772	240.03	111210000	110	9	7	9	8	10	3	9	7	9	8	10	3	9	7	9	8	10	3	33.9	29.7	37.1
P16401	Histone H1.5	HIST1H1B	23.9529	23.5706	23.7617	24.3995	24.912	24.6557	23.7342	21.3047	22.5194	-0.89403	-2.13632	1.24229	0.538109	0.227459	2.36574		5	5	5	19.5	19.5	19.5	22.58	26.161	44712000	82	4	2	3	3	5	3	4	2	3	3	5	3	4	2	3	3	5	3	12.4	10.2	10.6
O15144	Actin-related protein 2/3 complex subunit 2	ARPC2	25.4793	24.9534	25.2163	23.6886	24.9215	24.3051	24.2442	21.8199	23.0321	0.91126	-1.27299	2.18425	1.88069	0.413803	4.54489		14	14	14	43.7	43.7	43.7	34.333	81.471	179670000	93	13	8	8	8	11	3	13	8	8	8	11	3	13	8	8	8	11	3	37.3	23	23.7
P09525	Annexin A4	ANXA4	23.5475	24.5358	24.0416	23.4102	24.6553	24.0328	25.2682	21.7691	23.5187	0.008855	-0.514055	0.52291	1.00616	0.700251	1.43685		23	23	23	61.1	61.1	61.1	35.882	212.81	106420000	104	10	12	11	11	17	6	10	12	11	11	17	6	10	12	11	11	17	6	32.6	39.2	32
Q7L1Q6	Basic leucine zipper and W2 domain-containing protein 1	BZW1	24.1262	24.5336	24.3299	24.0632	24.0219	24.0426	20.9465	20.2074	20.5769	0.28734	-3.46565	3.75299	1.22039	0.0905181	13.4823		16	15	15	38.4	36.8	36.8	48.043	76.627	131400000	72	6	9	10	6	7	4	5	9	9	5	6	3	5	9	9	5	6	3	13.4	19.1	20.8
Q01130;Q9BRL6	Serine/arginine-rich splicing factor 2;Serine/arginine-rich splicing factor 8	SRSF2;SRSF8	24.2963	25.6194	24.9578	23.8811	25.5614	24.7213	23.3765	20.893	22.1348	0.23657	-2.58649	2.82306	1.17819	0.16649	7.07662		3	3	3	14.5	14.5	14.5	25.476	111.39	53345000	73	3	3	3	3	3	2	3	3	3	3	3	2	3	3	3	3	3	2	14.5	14.5	14.5
P04040	Catalase	CAT	24.0113	24.1361	24.0737	24.3148	24.4185	24.3666	22.1688	20.9377	21.5532	-0.29294	-2.81339	2.52045	0.816237	0.142261	5.73761		21	21	21	43.1	43.1	43.1	59.755	110.54	114150000	106	15	8	13	12	8	4	15	8	13	12	8	4	15	8	13	12	8	4	29.8	15.4	27.3
P30038	Delta-1-pyrroline-5-carboxylate dehydrogenase, mitochondrial	ALDH4A1	25.0278	25.3432	25.1855	24.611	24.8035	24.7073	21.4812	20.9347	21.2079	0.478245	-3.49932	3.97756	1.39305	0.08843	15.7531		21	21	21	42.6	42.6	42.6	61.719	190.87	190870000	115	16	12	10	13	6	6	16	12	10	13	6	6	16	12	10	13	6	6	36.1	26.3	22.2
Q9HAB8	Phosphopantothenate--cysteine ligase	PPCS	23.3828	24.1383	23.7606	23.4741	24.0713	23.7727	23.1915	19.4466	21.3191	-0.01211	-2.45359	2.44148	0.991641	0.182557	5.43197		10	10	10	29.3	29.3	29.3	34.005	35.32	68134000	64	7	5	5	6	5	0	7	5	5	6	5	0	7	5	5	6	5	0	21.9	15.8	16.4
Q93009	Ubiquitin carboxyl-terminal hydrolase 7	USP7	24.3484	24.5213	24.4349	24.8666	24.5312	24.6989	23.5104	19.8285	21.6694	-0.26405	-3.02948	2.76543	0.832747	0.122472	6.79948		37	37	37	41	41	41	128.3	142.93	139640000	160	15	14	19	14	27	6	15	14	19	14	27	6	15	14	19	14	27	6	14.1	12.7	18.7
Q16836	Hydroxyacyl-coenzyme A dehydrogenase, mitochondrial	HADH	22.8344	23.8457	23.3401	23.6957	24.0924	23.8941	23.0349	19.8294	21.4322	-0.55401	-2.46192	1.9079	0.681124	0.181505	3.75264		11	11	11	43.3	43.3	43.3	34.293	34.062	58969000	52	4	4	5	6	6	0	4	4	5	6	6	0	4	4	5	6	6	0	13.4	12.1	14.6
Q15717;Q12926;P26378	ELAV-like protein 1	ELAVL1	23.9357	23.1555	23.5456	23.866	23.7807	23.8233	23.838	18.8959	21.367	-0.277715	-2.45636	2.17865	0.824896	0.182205	4.5273		10	10	10	33.7	33.7	33.7	36.091	61.163	39379000	71	4	4	4	6	8	1	4	4	4	6	8	1	4	4	4	6	8	1	13.5	12.6	13.5
O43847	Nardilysin	NRD1	23.5092	23.5828	23.546	24.6969	24.4297	24.5633	23.5336	19.6271	21.5804	-1.01733	-2.98296	1.96563	0.49403	0.126486	3.90582	+	40	40	40	38.1	38.1	38.1	131.57	323.31	120830000	197	15	19	20	19	32	4	15	19	20	19	32	4	15	19	20	19	32	4	14.5	16.3	18.2
P26640	Valine--tRNA ligase	VARS	23.1314	23.9844	23.5579	23.7731	24.5946	24.1839	23.9464	19.8691	21.9077	-0.62597	-2.27614	1.65018	0.647984	0.206449	3.13872		40	40	40	38	38	38	140.47	288.75	110560000	210	13	14	19	25	32	4	13	14	19	25	32	4	13	14	19	25	32	4	12.8	14.2	17.6
Q7Z2Z2	Elongation factor Tu GTP-binding domain-containing protein 1	EFTUD1	23.4324	23.9213	23.6769	24.9272	24.6724	24.7998	24.3201	17.6729	20.9965	-1.12294	-3.80327	2.68033	0.459159	0.0716311	6.41005		14	14	14	17.1	17.1	17.1	125.43	117.92	39005000	44	3	3	5	5	12	0	3	3	5	5	12	0	3	3	5	5	12	0	3.9	3.9	6.2
Q13011	Delta(3,5)-Delta(2,4)-dienoyl-CoA isomerase, mitochondrial	ECH1	24.9621	25.5212	25.2417	23.2809	24.9457	24.1133	24.4932	17.6942	21.0937	1.12836	-3.0196	4.14796	2.1861	0.123313	17.7281		10	10	9	36.9	36.9	34.5	35.816	248.86	178250000	85	8	8	7	7	3	0	8	8	7	7	3	0	7	7	6	6	3	0	25	28.4	23.8
P10768	S-formylglutathione hydrolase	ESD	24.992	25.657	25.3245	23.8651	24.8669	24.366	24.8705	18.0532	21.4618	0.958575	-2.90414	3.86272	1.94339	0.133588	14.5477		14	14	14	68.1	68.1	68.1	31.462	117.48	201720000	110	9	6	6	6	10	1	9	6	6	6	10	1	9	6	6	6	10	1	36.9	20.6	23.4
P18077	60S ribosomal protein L35a	RPL35A	24.0764	25.7161	24.8963	23.6322	25.5143	24.5733	24.3439	18.2529	21.2984	0.323	-3.27482	3.59783	1.25093	0.103319	12.1075		7	7	7	40	40	40	12.538	19.683	57124000	72	3	4	2	5	5	1	3	4	2	5	5	1	3	4	2	5	5	1	15.5	31.8	14.5
P62942;A0A087WV48	Peptidyl-prolyl cis-trans isomerase FKBP1A	FKBP1A	23.708	25.0331	24.3706	19.649	24.1189	21.884	23.9132	23.7013	23.8072	2.48658	1.92327	0.563315	5.60448	3.7928	1.47766		3	3	3	39.8	39.8	39.8	11.951	46.977	30123000	38	2	2	1	3	2	2	2	2	1	3	2	2	2	2	1	3	2	2	25	25	12
P61204;P84077;F5H423;H0YGG7	ADP-ribosylation factor 3;ADP-ribosylation factor 1	ARF3;ARF1	25.6092	24.9929	25.301	18.244	25.3593	21.8017	24.3111	23.9125	24.1118	3.49937	2.31012	1.18925	11.3088	4.95923	2.28035		13	7	7	70.7	40.9	40.9	20.601	193.12	88394000	114	6	5	2	4	12	12	4	3	1	3	6	6	4	3	1	3	6	6	37.6	32	14.4
P48506	Glutamate--cysteine ligase catalytic subunit	GCLC	25.1642	25.3345	25.2493	21.44	22.4149	21.9275	24.3807	24.4948	24.4378	3.32186	2.51029	0.811565	9.99953	5.69737	1.75511	+	30	30	30	48.2	48.2	48.2	72.765	150.1	259110000	176	19	16	7	9	18	21	19	16	7	9	18	21	19	16	7	9	18	21	35.8	26.1	10.7
P25398	40S ribosomal protein S12	RPS12	24.5518	24.711	24.6314	19.5886	24.8895	22.239	25.4004	25.2566	25.3285	2.39234	3.08944	-0.69709	5.2501	8.51163	0.616815		8	8	8	53	53	53	14.515	19.945	39641000	66	4	2	1	3	7	4	4	2	1	3	7	4	4	2	1	3	7	4	31.8	12.9	6.8
O15511	Actin-related protein 2/3 complex subunit 5	ARPC5	24.0625	24.0573	24.0599	19.7693	23.3995	21.5844	23.236	24.0634	23.6497	2.47548	2.06531	0.410175	5.56154	4.18524	1.32885		7	7	6	62.3	62.3	62.3	16.32	24.095	32280000	37	3	2	1	3	5	4	3	2	1	3	5	4	2	2	1	3	5	4	21.9	14.6	7.9
P05161	Ubiquitin-like protein ISG15	ISG15	25.7384	24.5741	25.1562	20.2752	23.7322	22.0037	23.665	24.9364	24.3007	3.1525	2.29698	0.855525	8.89195	4.91426	1.80942		7	7	7	48.5	48.5	48.5	17.887	19.67	34222000	50	4	3	0	4	6	4	4	3	0	4	6	4	4	3	0	4	6	4	23.6	17.6	0
Q15370	Transcription elongation factor B polypeptide 2	TCEB2	23.8632	23.8071	23.8351	17.6217	23.5093	20.5655	23.7929	23.9715	23.8822	3.26962	3.31673	-0.04711	9.64392	9.96403	0.967873		9	9	9	46.6	46.6	46.6	13.133	38.21	30845000	43	4	5	1	6	6	4	4	5	1	6	6	4	4	5	1	6	6	4	38.1	45.8	6.8
O75368	SH3 domain-binding glutamic acid-rich-like protein	SH3BGRL	23.5084	23.5797	23.5441	17.7966	24.0461	20.9214	23.9654	24.2512	24.1083	2.62271	3.18696	-0.56424	6.15908	9.10687	0.676312		8	8	8	79.8	79.8	79.8	12.774	41.001	23655000	48	2	2	1	3	6	5	2	2	1	3	6	5	2	2	1	3	6	5	20.2	21.9	11.4
P36639	7,8-dihydro-8-oxoguanine triphosphatase	NUDT1	22.0455	24.1426	23.094	18.2773	23.5789	20.9281	23.7587	23.3736	23.5661	2.16595	2.63804	-0.47209	4.4876	6.22483	0.720919		6	6	6	26.9	26.9	26.9	22.519	46.52	26506000	46	3	2	1	3	4	5	3	2	1	3	4	5	3	2	1	3	4	5	13.2	6.6	6.1
Q9UI30	Multifunctional methyltransferase subunit TRM112-like protein	TRMT112	22.8541	21.6226	22.2383	17.6865	22.4622	20.0743	22.8111	23.2565	23.0338	2.16399	2.95947	-0.79548	4.48153	7.77838	0.576151		5	5	5	53.6	53.6	53.6	14.199	59.986	8751500	39	3	3	0	3	4	4	3	3	0	3	4	4	3	3	0	3	4	4	32.8	32.8	0
Q9UHV9	Prefoldin subunit 2	PFDN2	23.1747	21.5892	22.382	18.0304	21.9143	19.9724	22.9637	22.9675	22.9656	2.40959	2.99323	-0.583635	5.31323	7.96252	0.66728		4	4	4	32.5	32.5	32.5	16.648	135.77	18129000	44	4	3	1	3	2	2	4	3	1	3	2	2	4	3	1	3	2	2	32.5	22.7	5.8
Q9NR28	Diablo homolog, mitochondrial	DIABLO	22.6972	21.0929	21.8951	19.1988	21.8413	20.5201	22.8958	23.0021	22.9489	1.37496	2.42886	-1.0539	2.59362	5.38468	0.481666		9	9	9	40.2	40.2	40.2	27.131	44.598	14219000	27	3	3	1	4	6	4	3	3	1	4	6	4	3	3	1	4	6	4	16.7	13.4	4.2
Q9H773	dCTP pyrophosphatase 1	DCTPP1	21.1569	21.4218	21.2894	18.2102	22.48	20.3451	24.0499	22.5777	23.3138	0.94426	2.96869	-2.02443	1.9242	7.82822	0.245803		12	12	12	59.4	59.4	59.4	18.681	42.503	13902000	54	3	3	1	3	11	5	3	3	1	3	11	5	3	3	1	3	11	5	21.8	21.2	7.6
Q9BYN0	Sulfiredoxin-1	SRXN1	23.5552	23.5603	23.5578	18.6006	21.4744	20.0375	22.9999	23.2988	23.1493	3.52028	3.11186	0.40842	11.4739	8.64496	1.32723		7	7	7	66.4	66.4	66.4	14.259	16.551	10662000	25	3	3	0	2	5	4	3	3	0	2	5	4	3	3	0	2	5	4	21.9	21.9	0
Q9BVJ7	Dual specificity protein phosphatase 23	DUSP23	22.5337	22.6992	22.6165	18.4427	22.0657	20.2542	22.7516	22.5206	22.6361	2.36228	2.38191	-0.019635	5.14181	5.21226	0.986482		12	12	12	86.7	86.7	86.7	16.588	20.395	7155700	44	6	4	0	3	12	7	6	4	0	3	12	7	6	4	0	3	12	7	42	26	0
P55769	NHP2-like protein 1;NHP2-like protein 1, N-terminally processed	NHP2L1	23.1856	22.1868	22.6862	18.6982	22.5332	20.6157	22.366	22.3364	22.3512	2.0705	1.73554	0.334965	4.20032	3.33003	1.26135		3	3	3	31.2	31.2	31.2	14.173	38.957	9179500	34	2	2	1	2	3	3	2	2	1	2	3	3	2	2	1	2	3	3	18.8	18.8	9.4
Q15691	Microtubule-associated protein RP/EB family member 1	MAPRE1	24.3068	21.5023	22.9045	18.5171	21.452	19.9845	24.2238	21.7457	22.9847	2.92002	3.00023	-0.080215	7.56857	8.0013	0.945917		9	9	8	40.7	40.7	40.7	29.999	92.542	31060000	53	4	3	1	5	9	2	4	3	1	5	9	2	4	2	1	4	8	2	24.6	14.6	7.5
Q9BVK6	Transmembrane emp24 domain-containing protein 9	TMED9	21.8654	22.1907	22.0281	18.9766	23.4362	21.2064	22.8274	22.5142	22.6708	0.821675	1.46438	-0.6427	1.76746	2.75944	0.640513		9	9	8	31.9	31.9	24.7	27.277	147.39	21823000	42	3	2	1	2	8	4	3	2	1	2	8	4	3	2	1	2	7	4	8.5	7.7	4.7
Q14997	Proteasome activator complex subunit 4	PSME4	21.9515	22.9148	22.4332	18.9138	22.2898	20.6018	21.9352	23.0551	22.4952	1.83138	1.89336	-0.061975	3.55877	3.71498	0.957952		34	34	34	24.9	24.9	24.9	211.33	201.64	34903000	98	9	15	3	9	23	23	9	15	3	9	23	23	9	15	3	9	23	23	5.8	9.7	1.8
P61923	Coatomer subunit zeta-1	COPZ1	22.6376	23.5859	23.1117	19.939	23.7511	21.8451	23.7408	23.7505	23.7457	1.26667	1.90058	-0.63391	2.40606	3.73363	0.644428		6	6	6	36.2	36.2	36.2	20.198	40.115	24258000	38	3	2	1	3	6	3	3	2	1	3	6	3	3	2	1	3	6	3	18.6	11.9	5.6
O43617	Trafficking protein particle complex subunit 3	TRAPPC3	23.0198	23.0851	23.0524	19.6345	22.7689	21.2017	22.893	22.9913	22.9421	1.85074	1.74044	0.110295	3.60684	3.34137	1.07945		11	11	11	49.4	49.4	49.4	20.274	22.711	19777000	41	5	4	2	4	7	3	5	4	2	4	7	3	5	4	2	4	7	3	31.7	15	10.6
P49755	Transmembrane emp24 domain-containing protein 10	TMED10	22.4313	22.6869	22.5591	19.2426	22.6929	20.9677	23.2918	22.9993	23.1456	1.59137	2.17782	-0.58645	3.01336	4.52471	0.66598		8	8	8	43.4	43.4	43.4	24.976	50.693	18378000	45	5	2	1	5	6	5	5	2	1	5	6	5	5	2	1	5	6	5	17.4	8.2	3.2
Q9Y3C8	Ubiquitin-fold modifier-conjugating enzyme 1	UFC1	22.7953	21.8916	22.3434	18.4429	21.7387	20.0908	21.5702	21.8832	21.7267	2.25264	1.63591	0.61673	4.76554	3.10784	1.5334		3	3	3	16.2	16.2	16.2	19.458	5.814	11629000	20	3	2	1	2	2	2	3	2	1	2	2	2	3	2	1	2	2	2	16.2	10.2	5.4
Q9Y2S2	Lambda-crystallin homolog	CRYL1	21.8809	22.6172	22.2491	19.143	22.5233	20.8331	21.8845	19.7603	20.8224	1.41591	-0.01078	1.4267	2.66829	0.992556	2.6883		8	8	8	26.6	26.6	26.6	35.419	21.679	23429000	25	3	5	1	6	2	0	3	5	1	6	2	0	3	5	1	6	2	0	11.9	16	3.1
Q9UMY4	Sorting nexin-12	SNX12	22.3566	22.0312	22.1939	17.8416	22.4027	20.1222	22.1587	21.586	21.8723	2.07173	1.75015	0.32158	4.2039	3.36394	1.2497		8	8	6	49.4	49.4	45.3	19.73	54.442	8589500	33	3	3	0	4	6	4	3	3	0	4	6	4	2	2	0	2	5	4	13.4	13.4	0
Q969T9	WW domain-binding protein 2	WBP2	21.6015	21.8907	21.7461	19.1173	22.1238	20.6206	21.8061	20.1227	20.9644	1.12555	0.343865	0.781685	2.18185	1.26915	1.71914		7	7	7	24.1	24.1	24.1	28.087	25.521	9490500	40	4	2	1	2	6	5	4	2	1	2	6	5	4	2	1	2	6	5	18.4	7.3	3.8
O43324;C9J1V9	Eukaryotic translation elongation factor 1 epsilon-1	EEF1E1;EEF1E1-BLOC1S5	23.0846	23.2552	23.1699	20.0256	22.7768	21.4012	21.9955	21.505	21.7502	1.76877	0.34905	1.41972	3.40762	1.27372	2.67533		8	8	8	50	50	50	19.81	40.934	14028000	43	5	3	1	4	6	4	5	3	1	4	6	4	5	3	1	4	6	4	24.1	13.8	8.6
P00374;Q86XF0	Dihydrofolate reductase	DHFR	23.7116	22.8286	23.2701	18.45	23.2017	20.8258	23.1994	19.2403	21.2198	2.44427	0.394015	2.05025	5.44248	1.31405	4.14178		10	10	10	65.8	65.8	65.8	21.452	31.709	24453000	48	7	2	1	6	8	1	7	2	1	6	8	1	7	2	1	6	8	1	41.2	9.1	5.3
Q9Y617	Phosphoserine aminotransferase	PSAT1	19.5104	23.4167	21.4636	22.3267	22.9746	22.6506	22.4883	22.8177	22.653	-1.18708	0.00239	-1.18948	0.439189	1.00166	0.438462		14	14	14	46.5	46.5	46.5	40.422	66.385	39088000	52	2	8	6	10	8	9	2	8	6	10	8	9	2	8	6	10	8	9	5.1	22.4	17
Q8N8N7;G3V3Y1	Prostaglandin reductase 2	PTGR2	20.397	23.6332	22.0151	22.7625	22.9691	22.8658	22.2828	21.7272	22.005	-0.8507	-0.860835	0.010135	0.554516	0.550634	1.00705		9	9	9	28.5	28.5	28.5	38.499	79.401	44056000	39	1	6	4	3	7	6	1	6	4	3	7	6	1	6	4	3	7	6	2.3	20.2	12.3
P35237	Serpin B6	SERPINB6	18.7788	23.8641	21.3215	24.6168	22.8956	23.7562	24.2814	24.6197	24.4506	-2.43473	0.69437	-3.1291	0.184958	1.61818	0.1143		15	15	14	51.9	51.9	49.7	42.621	208.83	90910000	103	0	9	2	9	11	12	0	9	2	9	11	12	0	8	1	8	11	11	0	28.7	6.1
P49903	Selenide, water dikinase 1	SEPHS1	20.654	22.93	21.792	23.3769	23.1523	23.2646	22.7324	22.596	22.6642	-1.47261	-0.600385	-0.87223	0.360329	0.659578	0.546302		10	10	10	44.1	44.1	44.1	42.91	76.424	44592000	60	3	3	4	5	9	8	3	3	4	5	9	8	3	3	4	5	9	8	12.2	10.5	13.8
Q9BWD1	Acetyl-CoA acetyltransferase, cytosolic	ACAT2	18.5365	22.8129	20.6747	23.4723	23.1449	23.3086	23.3578	24.0296	23.6937	-2.63388	0.385105	-3.01898	0.161111	1.30595	0.123366		15	15	15	54.9	54.9	54.9	41.35	141.36	51311000	59	1	5	3	5	10	10	1	5	3	5	10	10	1	5	3	5	10	10	3.3	10.3	5.8
Q8WVJ2	NudC domain-containing protein 2	NUDCD2	18.6882	21.9005	20.2943	22.8875	22.9608	22.9241	22.4246	22.481	22.4528	-2.62983	-0.47134	-2.15849	0.161564	0.721294	0.223991		7	7	7	54.8	54.8	54.8	17.676	87.313	11858000	32	1	2	2	3	6	5	1	2	2	3	6	5	1	2	2	3	6	5	7	13.4	13.4
Q14683	Structural maintenance of chromosomes protein 1A	SMC1A	17.4003	23.8457	20.623	23.1703	22.3486	22.7594	23.6347	23.5255	23.5801	-2.13641	0.820655	-2.95707	0.227444	1.76621	0.128775		28	28	28	28.3	28.3	28.3	143.23	86.48	24702000	56	1	4	6	8	20	12	1	4	6	8	20	12	1	4	6	8	20	12	0.6	2.8	6.7
O60547	GDP-mannose 4,6 dehydratase	GMDS	17.976	22.2034	20.0897	21.8304	21.9044	21.8674	22.5879	22.5057	22.5468	-1.77768	0.67948	-2.45716	0.291652	1.60156	0.182105		12	12	12	38.2	38.2	38.2	41.949	59.982	27929000	40	1	3	3	4	9	5	1	3	3	4	9	5	1	3	3	4	9	5	3.2	9.9	7.8
P83916	Chromobox protein homolog 1	CBX1	19.0993	20.2203	19.6598	23.1801	23.2727	23.2264	22.653	22.8995	22.7762	-3.56659	-0.450195	-3.1164	0.0844011	0.731944	0.115311	+	8	7	7	34.6	25.9	25.9	21.418	80.493	18516000	35	2	1	4	3	7	5	1	1	3	2	6	4	1	1	3	2	6	4	14.6	5.9	24.3
Q9HAV7	GrpE protein homolog 1, mitochondrial	GRPEL1	23.3797	19.4915	21.4356	23.772	23.3992	23.5856	23.284	23.1885	23.2363	-2.15005	-0.349355	-1.8007	0.225305	0.784935	0.287036		7	7	7	42.9	42.9	42.9	24.279	18.535	30315000	35	4	1	4	2	5	3	4	1	4	2	5	3	4	1	4	2	5	3	20.7	4.1	20.3
Q92945	Far upstream element-binding protein 2	KHSRP	22.4889	20.7729	21.6309	23.7351	22.9383	23.3367	23.8812	23.4966	23.6889	-1.7058	0.35216	-2.05795	0.306552	1.27647	0.240156		20	20	20	39.1	39.1	39.1	73.114	143.16	66193000	118	9	4	8	6	14	12	9	4	8	6	14	12	9	4	8	6	14	12	17.2	6.6	14.6
P33316	Deoxyuridine 5-triphosphate nucleotidohydrolase, mitochondrial	DUT	22.2244	19.8936	21.059	23.1617	23.1092	23.1354	24.0714	23.9926	24.032	-2.07644	0.89656	-2.973	0.237099	1.86162	0.127361		7	7	7	34.9	34.9	34.9	26.563	65.221	28953000	68	5	1	2	5	5	6	5	1	2	5	5	6	5	1	2	5	5	6	25	3.2	7.1
P23919	Thymidylate kinase	DTYMK	23.0341	19.6972	21.3656	24.3977	22.9234	23.6606	23.3979	22.8498	23.1239	-2.29496	-0.53671	-1.75824	0.203774	0.689341	0.295608		10	10	10	46.2	46.2	46.2	23.819	46.78	29973000	49	7	1	6	7	6	7	7	1	6	7	6	7	7	1	6	7	6	7	31.6	3.8	28.3
P09661	U2 small nuclear ribonucleoprotein A	SNRPA1	22.6832	19.3542	21.0187	23.4514	22.8729	23.1621	23.3661	24.0393	23.7027	-2.14341	0.540625	-2.68403	0.226344	1.4546	0.155606		11	11	11	47.5	47.5	47.5	28.415	98.843	31454000	55	4	1	5	5	8	9	4	1	5	5	8	9	4	1	5	5	8	9	19.6	3.1	24.3
P14678;P63162	Small nuclear ribonucleoprotein-associated proteins B and B;Small nuclear ribonucleoprotein-associated protein N	SNRPB;SNRPN	23.4758	19.6884	21.5821	23.635	23.7872	23.7111	24.6362	23.8271	24.2316	-2.12897	0.52053	-2.6495	0.228621	1.43448	0.159375		11	11	11	35	35	35	24.61	69.676	61050000	64	3	1	3	3	11	9	3	1	3	3	11	9	3	1	3	3	11	9	14.6	2.9	9.2
Q8NFV4	Alpha/beta hydrolase domain-containing protein 11	ABHD11	22.9881	19.4644	21.2262	23.8523	23.7804	23.8164	22.0319	21.777	21.9045	-2.59011	-1.91187	-0.678245	0.166073	0.265749	0.624925		9	9	9	34.3	34.3	34.3	34.69	24.299	54402000	43	4	1	6	5	5	4	4	1	6	5	5	4	4	1	6	5	5	4	13.7	3.2	19.4
P33992	DNA replication licensing factor MCM5	MCM5	21.9134	19.771	20.8422	23.2928	22.928	23.1104	22.7375	23.0389	22.8882	-2.26815	-0.222145	-2.04601	0.207596	0.85729	0.242154		22	22	22	33.8	33.8	33.8	82.285	55.683	47086000	92	10	2	14	14	8	11	10	2	14	14	8	11	10	2	14	14	8	11	15.8	3	21.9
P08579	U2 small nuclear ribonucleoprotein B	SNRPB2	22.8797	19.0297	20.9547	23.1975	23.0216	23.1096	23.0511	22.8325	22.9418	-2.15485	-0.16778	-1.98707	0.224557	0.890211	0.252252		7	7	5	32	32	27.6	25.486	25.452	36523000	36	2	1	3	3	6	5	2	1	3	3	6	5	1	0	2	2	4	3	8	3.6	12.4
P25685	DnaJ homolog subfamily B member 1	DNAJB1	22.7051	18.1713	20.4382	23.4248	22.532	22.9784	23.189	23.1898	23.1894	-2.54026	0.210965	-2.75123	0.171912	1.15746	0.148525		9	9	8	32.1	32.1	28.5	38.044	42.73	24269000	75	5	1	3	4	9	7	5	1	3	4	9	7	4	1	3	3	8	6	19.1	2.9	10.3
O94906	Pre-mRNA-processing factor 6	PRPF6	19.7091	19.4906	19.5999	21.7351	20.9872	21.3612	23.6028	22.9456	23.2742	-1.76131	1.91303	-3.67434	0.29498	3.76599	0.0783274	+	27	27	27	33.4	33.4	33.4	106.92	163.78	28573000	95	4	2	10	7	21	15	4	2	10	7	21	15	4	2	10	7	21	15	4.3	2.3	12.1
P58107	Epiplakin	EPPK1	20.3253	20.1899	20.2576	21.5771	21.0195	21.2983	24.6324	24.4908	24.5616	-1.04071	3.26326	-4.30397	0.486088	9.6015	0.0506263		77	71	71	54	46.6	46.6	555.61	323.31	69987000	247	8	5	17	8	66	55	7	4	16	7	60	49	7	4	16	7	60	49	4.8	2.1	9
Q00341	Vigilin	HDLBP	20.8321	19.3958	20.114	22.4982	21.0207	21.7595	23.5792	23.2911	23.4352	-1.64546	1.67571	-3.32117	0.319646	3.19477	0.100053		34	34	34	33	33	33	141.45	237.97	32801000	106	5	1	11	6	27	23	5	1	11	6	27	23	5	1	11	6	27	23	4.1	0.9	9.4
P63167	Dynein light chain 1, cytoplasmic	DYNLL1	21.7163	19.2988	20.5076	21.3342	20.4049	20.8696	24.3773	21.5518	22.9645	-0.36201	2.09497	-2.45698	0.77808	4.27217	0.182127		5	5	3	64	64	39.3	10.366	41.285	10357000	29	2	1	3	2	5	3	2	1	3	2	5	3	1	1	1	1	3	2	37.1	24.7	49.4
P61513;A6NKH3	60S ribosomal protein L37a	RPL37A	21.9508	17.3695	19.6601	22.275	21.4277	21.8514	24.0097	23.7165	23.8631	-2.19122	2.01171	-4.20294	0.218966	4.03261	0.0542988		3	3	3	41.3	41.3	41.3	10.275	13.14	14915000	22	2	1	2	2	3	2	2	1	2	2	3	2	2	1	2	2	3	2	28.3	19.6	28.3
P36507	Dual specificity mitogen-activated protein kinase kinase 2	MAP2K2	21.7128	18.5855	20.1491	21.6214	21.7565	21.6889	22.8422	22.3246	22.5834	-1.5398	0.89446	-2.43426	0.343933	1.85891	0.185018		13	13	7	41.8	41.8	27.5	44.424	39.867	31666000	31	3	0	4	5	6	10	3	0	4	5	6	10	2	0	2	1	2	6	9.8	0	10.8
P28676	Grancalcin	GCA	22.0667	18.6624	20.3646	22.0034	20.9415	21.4724	22.9573	22.8796	22.9185	-1.10789	1.44602	-2.55391	0.463971	2.72455	0.170292		8	8	8	45.2	45.2	45.2	24.01	62.898	16443000	34	3	1	3	2	8	7	3	1	3	2	8	7	3	1	3	2	8	7	13.8	5.1	13.8
P28482	Mitogen-activated protein kinase 1	MAPK1	21.7412	19.8309	20.7861	21.3208	22.0111	21.6659	23.274	22.6672	22.9706	-0.87989	1.30465	-2.18454	0.543409	2.47023	0.219983		14	10	10	50.3	37.5	37.5	41.389	28.221	26262000	41	3	3	3	5	11	8	2	2	2	3	8	6	2	2	2	3	8	6	9.4	9.4	7.5
P10620	Microsomal glutathione S-transferase 1	MGST1	22.1392	20.3999	21.2695	21.6195	20.9217	21.2706	23.7615	24.28	24.0208	-0.00105	2.75016	-2.75122	0.999272	6.72794	0.148526		6	6	6	30.3	30.3	30.3	17.598	60.458	14432000	41	3	3	2	4	5	6	3	3	2	4	5	6	3	3	2	4	5	6	16.8	19.4	9
P04183	Thymidine kinase, cytosolic	TK1	22.774	18.8619	20.818	21.3392	21.9394	21.6393	23.67	22.855	23.2625	-0.821295	1.62325	-2.44454	0.565934	3.08067	0.183705		14	14	14	62.8	62.8	62.8	25.468	189.36	27457000	48	5	1	4	4	11	12	5	1	4	4	11	12	5	1	4	4	11	12	32.1	3	26.5
O43390	Heterogeneous nuclear ribonucleoprotein R	HNRNPR	21.5801	19.7218	20.651	22.2709	21.9159	22.0934	22.7679	23.3901	23.079	-1.44242	0.9856	-2.42802	0.36795	1.98014	0.18582		24	19	19	42.2	34.6	34.6	70.942	133.33	33815000	99	11	8	13	11	15	19	6	4	8	6	10	14	6	4	8	6	10	14	19.1	13.3	20.9
O60610	Protein diaphanous homolog 1	DIAPH1	22.5657	19.3112	20.9384	21.438	21.0193	21.2287	24.6713	24.5904	24.6308	-0.29023	3.40215	-3.69238	0.817772	10.5718	0.0773543		48	48	48	42.1	42.1	42.1	141.35	323.31	60379000	161	15	3	12	8	40	29	15	3	12	8	40	29	15	3	12	8	40	29	13.6	3.3	9.9
Q9BUQ8	Probable ATP-dependent RNA helicase DDX23	DDX23	19.1895	21.7909	20.4902	21.7442	21.0968	21.4205	22.2443	21.6292	21.9368	-0.930295	0.516265	-1.44656	0.524751	1.43025	0.366895		18	18	18	29.3	29.3	29.3	95.581	33.529	20381000	42	1	5	8	5	12	6	1	5	8	5	12	6	1	5	8	5	12	6	1	7	11.2
P61962	DDB1- and CUL4-associated factor 7	DCAF7	19.0121	21.1765	20.0943	20.8193	21.5036	21.1615	21.6465	21.7949	21.7207	-1.06718	0.5592	-1.62638	0.477251	1.47345	0.3239		8	8	8	30.4	30.4	30.4	38.926	108.86	16585000	42	1	4	5	6	5	5	1	4	5	6	5	5	1	4	5	6	5	5	3.8	14.3	17
P52701	DNA mismatch repair protein Msh6	MSH6	19.8294	21.2512	20.5403	20.5486	20.4123	20.4804	22.7639	22.3848	22.5743	0.059895	2.09393	-2.03404	1.04239	4.26909	0.244171		31	31	31	29.7	29.7	29.7	152.78	130.3	14539000	83	4	4	5	6	29	17	4	4	5	6	29	17	4	4	5	6	29	17	3.5	3.7	4.4
O75116	Rho-associated protein kinase 2	ROCK2	18.7556	21.1296	19.9426	21.3462	20.0419	20.6941	22.6341	22.5099	22.572	-0.751485	1.8779	-2.62938	0.593992	3.6754	0.161613		36	36	31	30.4	30.4	26.4	160.9	147.23	16131000	77	4	2	11	6	24	24	4	2	11	6	24	24	4	1	11	5	22	20	3.3	1.4	8.8
O76071	Probable cytosolic iron-sulfur protein assembly protein CIAO1	CIAO1	19.6208	21.6952	20.658	21.3724	21.2122	21.2923	22.4324	22.4584	22.4454	-0.63431	1.15308	-1.7874	0.644249	2.22389	0.289695		9	9	9	44.2	44.2	44.2	37.84	105.54	20709000	58	2	5	5	6	8	6	2	5	5	6	8	6	2	5	5	6	8	6	8.3	22.4	22.4
Q9NTJ3	Structural maintenance of chromosomes protein 4	SMC4	20.3546	21.4945	20.9245	22.1624	21.6247	21.8935	23.0158	22.6476	22.8317	-0.96902	0.938155	-1.90717	0.510853	1.91608	0.266614		33	33	33	29.5	29.5	29.5	147.18	201.92	24691000	89	8	9	10	8	27	19	8	9	10	8	27	19	8	9	10	8	27	19	7.2	8	8.8
O00629	Importin subunit alpha-3	KPNA4	19.5583	21.5214	20.5399	21.1723	21.6167	21.3945	22.4728	23.1512	22.812	-0.85462	1.41749	-2.27211	0.553011	2.67121	0.207026		12	9	9	37.6	32.1	32.1	57.886	125.38	30008000	34	6	3	2	3	9	8	4	2	2	2	7	6	4	2	2	2	7	6	18	7.9	6.1
Q7L2H7	Eukaryotic translation initiation factor 3 subunit M	EIF3M	19.907	22.5432	21.2251	21.1238	22.4924	21.8081	23.4209	23.3632	23.392	-0.583005	1.58394	-2.16695	0.667572	2.99787	0.222682		14	14	14	36.9	36.9	36.9	42.502	70.188	34406000	59	2	4	7	6	12	11	2	4	7	6	12	11	2	4	7	6	12	11	7.8	13.4	16.8
Q9P2R7	Succinyl-CoA ligase [ADP-forming] subunit beta, mitochondrial	SUCLA2	18.1325	20.8249	19.4787	22.1459	21.989	22.0675	21.4137	21.624	21.5188	-2.58873	-0.548645	-2.04008	0.166232	0.683662	0.243149		9	9	9	22.7	22.7	22.7	50.317	24.159	27955000	29	2	2	5	6	4	3	2	2	5	6	4	3	2	2	5	6	4	3	4.1	4.8	11.7
Q9H832	Ubiquitin-conjugating enzyme E2 Z	UBE2Z	19.2439	21.5833	20.4136	22.5113	22.0789	22.2951	21.4654	20.5794	21.0224	-1.88148	-1.27271	-0.60877	0.271405	0.413882	0.655756		10	10	10	34.5	34.5	34.5	38.21	31.409	18873000	45	2	4	4	4	6	5	2	4	4	4	6	5	2	4	4	4	6	5	4.8	9.9	9.9
P49770	Translation initiation factor eIF-2B subunit beta	EIF2B2	19.0509	20.6178	19.8344	21.2462	21.1058	21.176	21.6163	20.7192	21.1677	-1.34159	-0.008255	-1.33334	0.394584	0.994294	0.396848		8	8	8	24.5	24.5	24.5	38.989	50.924	9542700	27	1	3	3	5	5	3	1	3	3	5	5	3	1	3	3	5	5	3	4.6	13.1	9.7
O43837	Isocitrate dehydrogenase [NAD] subunit beta, mitochondrial	IDH3B	19.2849	21.3964	20.3406	21.9879	21.9007	21.9443	22.4989	20.5246	21.5117	-1.60366	-0.43258	-1.17109	0.32904	0.740936	0.444087		9	9	9	26.8	26.8	26.8	42.183	28.478	19760000	31	0	3	3	2	8	2	0	3	3	2	8	2	0	3	3	2	8	2	0	9.6	9.6
P45954	Short/branched chain specific acyl-CoA dehydrogenase, mitochondrial	ACADSB	18.3829	21.1416	19.7623	22.0241	21.6576	21.8409	21.3546	21.5935	21.474	-2.07861	-0.36683	-1.71178	0.236742	0.775485	0.305283		10	10	10	35	35	35	47.485	73.396	17658000	28	1	4	2	5	6	6	1	4	2	5	6	6	1	4	2	5	6	6	3	10.2	4.9
Q9Y5K5	Ubiquitin carboxyl-terminal hydrolase isozyme L5	UCHL5	21.1854	20.9838	21.0846	20.2046	21.866	21.0353	22.1395	22.5001	22.3198	0.04932	1.28453	-1.23521	1.03478	2.43603	0.424781		14	14	14	47.4	47.4	47.4	37.606	54.703	17030000	49	7	4	4	2	8	8	7	4	4	2	8	8	7	4	4	2	8	8	20.7	13.4	11.9
Q5VYK3	Proteasome-associated protein ECM29 homolog	ECM29	20.737	19.5907	20.1639	20.3993	20.5811	20.4902	21.8662	23.1827	22.5245	-0.326275	2.03429	-2.36057	0.797593	4.09621	0.194715		42	42	42	31	31	31	204.29	176.88	21859000	100	6	3	8	11	25	30	6	3	8	11	25	30	6	3	8	11	25	30	3.6	1.7	5.1
Q5GLZ8	Probable E3 ubiquitin-protein ligase HERC4	HERC4	20.0535	20.361	20.2073	20.4876	21.133	20.8103	21.991	22.2332	22.1121	-0.60304	1.30181	-1.90485	0.658365	2.46538	0.267044		23	23	23	30.8	30.8	30.8	118.56	110.53	17381000	56	4	4	4	8	15	15	4	4	4	8	15	15	4	4	4	8	15	15	4.2	4.2	4.4
P12277	Creatine kinase B-type	CKB	21.0264	19.8743	20.4503	20.758	21.4129	21.0855	21.808	22.4883	22.1482	-0.635125	1.06271	-1.69783	0.643885	2.08884	0.308249		10	10	10	38.6	38.6	38.6	42.644	150.72	31703000	36	5	4	6	6	4	3	5	4	6	6	4	3	5	4	6	6	4	3	15	15.2	24.4
L7N2F9;Q15836;P63027;P23763	Vesicle-associated membrane protein 3;Vesicle-associated membrane protein 2	VAMP3;VAMP2	20.615	19.4661	20.0405	19.6762	21.6691	20.6727	21.5112	21.9218	21.7165	-0.63212	1.04385	-1.67597	0.645228	2.06172	0.312957		3	3	3	19.8	19.8	19.8	13.068	18.084	3581900	23	2	1	0	3	3	2	2	1	0	3	3	2	2	1	0	3	3	2	19.8	14	0
O60341	Lysine-specific histone demethylase 1A	KDM1A	20.0099	20.4234	20.2166	20.373	21.591	20.982	21.9029	22.1443	22.0236	-0.76541	1.04153	-1.80694	0.588286	2.05841	0.285796		23	23	23	34.2	34.2	34.2	92.902	106.12	18980000	63	5	3	5	7	15	13	5	3	5	7	15	13	5	3	5	7	15	13	7.2	4.5	7.2
Q9Y508	E3 ubiquitin-protein ligase RNF114	RNF114	20.9457	19.3882	20.167	21.4028	20.7132	21.058	21.2026	21.3586	21.2806	-0.891025	0.222595	-1.11362	0.539231	1.16683	0.462133		6	6	6	36.8	36.8	36.8	25.694	33.345	9275400	46	3	1	5	4	5	5	3	1	5	4	5	5	3	1	5	4	5	5	18	4.4	28.9
Q9NYL9;Q9NZR1	Tropomodulin-3	TMOD3	19.8045	18.9481	19.3763	22.1093	20.4946	21.302	21.7039	22.5311	22.1175	-1.9257	0.81553	-2.74123	0.263213	1.75994	0.149557		12	12	12	43.5	43.5	43.5	39.594	37.412	12754000	39	3	1	4	4	8	6	3	1	4	4	8	6	3	1	4	4	8	6	12.5	2.8	12.2
Q9C0C9	E2/E3 hybrid ubiquitin-protein ligase UBE2O	UBE2O	20.6211	19.6219	20.1215	21.061	20.9615	21.0112	21.9489	21.9564	21.9526	-0.889755	0.941385	-1.83114	0.539706	1.92037	0.281042		20	20	20	23.6	23.6	23.6	141.29	92.815	20544000	78	7	2	7	5	16	13	7	2	7	5	16	13	7	2	7	5	16	13	8.5	2.9	7.1
Q9H8S9;Q7L9L4	MOB kinase activator 1A;MOB kinase activator 1B	MOB1A;MOB1B	20.9217	18.8066	19.8642	21.0572	19.8528	20.455	22.2315	21.7682	21.9999	-0.590855	1.54483	-2.13569	0.663949	2.91771	0.227559		4	4	4	22.7	22.7	22.7	25.079	12.753	6487300	24	2	0	2	1	4	4	2	0	2	1	4	4	2	0	2	1	4	4	10.6	0	10.6
Q7L014	Probable ATP-dependent RNA helicase DDX46	DDX46	21.2342	19.9429	20.5886	21.304	20.0166	20.6603	22.4296	21.8341	22.1318	-0.071705	1.47156	-1.54326	0.951513	2.77322	0.343108		21	21	21	25.5	25.5	25.5	117.36	74.838	13744000	89	8	2	6	3	19	11	8	2	6	3	19	11	8	2	6	3	19	11	9.2	1.9	7
Q08378	Golgin subfamily A member 3	GOLGA3	21.1	19.9679	20.534	21.3622	20.5298	20.946	21.6124	21.4037	21.5081	-0.412075	0.562025	-0.9741	0.751542	1.47634	0.509057		25	25	25	20.1	20.1	20.1	167.35	190.23	14493000	65	10	4	11	6	16	16	10	4	11	6	16	16	10	4	11	6	16	16	7.1	2.8	9.1
P61289	Proteasome activator complex subunit 3	PSME3	21.2501	20.0203	20.6352	20.7707	20.8829	20.8268	22.9903	21.8518	22.421	-0.191595	1.59425	-1.78585	0.875637	3.01939	0.290005		8	8	8	35	35	35	29.506	163.18	13659000	56	5	3	3	3	6	3	5	3	3	3	6	3	5	3	3	3	6	3	23.6	15	16.1
O15327	Type II inositol 3,4-bisphosphate 4-phosphatase	INPP4B	21.0397	19.9334	20.4866	20.7689	20.5292	20.649	21.9211	21.6446	21.7828	-0.16247	1.13379	-1.29626	0.893494	2.19435	0.407179		24	24	24	37.6	37.6	37.6	104.74	222.67	19542000	71	7	4	6	7	15	14	7	4	6	7	15	14	7	4	6	7	15	14	10.4	5	8.5
P27816	Microtubule-associated protein 4	MAP4	20.5334	19.5599	20.0467	21.6966	20.7869	21.2418	22.0079	21.8773	21.9426	-1.19506	0.700815	-1.89588	0.436767	1.62542	0.26871		18	18	18	20.9	20.9	20.9	121	55.088	13828000	65	7	1	8	5	14	10	7	1	8	5	14	10	7	1	8	5	14	10	8.4	1.2	9.6
Q9UNH7	Sorting nexin-6;Sorting nexin-6, N-terminally processed	SNX6	20.9553	18.4164	19.6858	21.9936	21.083	21.5383	22.0838	21.5165	21.8002	-1.85248	0.261835	-2.11432	0.276916	1.199	0.230955		10	9	9	28.1	28.1	28.1	46.648	93.857	23381000	26	3	1	3	4	5	4	3	1	3	3	5	4	3	1	3	3	5	4	9.9	2.5	8.6
Q92572	AP-3 complex subunit sigma-1	AP3S1	21.3943	18.8227	20.1085	20.8235	20.9781	20.9008	21.5517	20.8112	21.1815	-0.79228	0.280675	-1.07295	0.577431	1.21476	0.475344		5	5	5	27.5	27.5	27.5	21.732	41.768	5382500	35	2	1	3	2	4	3	2	1	3	2	4	3	2	1	3	2	4	3	13.5	5.7	18.1
Q16186	Proteasomal ubiquitin receptor ADRM1	ADRM1	21.7791	18.8857	20.3324	22.0106	21.7434	21.877	22.1896	21.9388	22.0642	-1.54458	0.187215	-1.73179	0.342795	1.13856	0.301077		5	5	5	17.4	17.4	17.4	42.153	35.163	17438000	63	3	1	2	2	2	4	3	1	2	2	2	4	3	1	2	2	2	4	11.1	3.9	6.1
Q13547;O15379	Histone deacetylase 1	HDAC1	21.8681	19.4488	20.6584	22.0862	21.183	21.6346	22.1817	21.5539	21.8678	-0.97618	0.233195	-1.20938	0.508324	1.17544	0.432456		10	10	6	27.2	27.2	17.8	55.102	26.385	33994000	52	8	1	3	6	4	3	8	1	3	6	4	3	4	0	1	4	1	1	23.4	2.5	6.6
P78347;Q86UP8;Q6EKJ0	General transcription factor II-I	GTF2I	21.5344	19.3649	20.4496	21.6344	20.8315	21.2329	22.2363	21.5385	21.8874	-0.783295	0.65444	-1.43773	0.581038	1.574	0.369146		20	20	20	24.4	24.4	24.4	112.42	61.536	18189000	65	4	1	6	4	17	10	4	1	6	4	17	10	4	1	6	4	17	10	4.1	1.1	6.7
P67870	Casein kinase II subunit beta	CSNK2B	22.0909	18.9568	20.5239	20.8231	21.1309	20.977	21.5603	21.5264	21.5434	-0.453175	0.56631	-1.01948	0.730434	1.48073	0.493292		8	8	8	41.4	41.4	41.4	24.942	44.849	11253000	25	2	1	2	2	7	4	2	1	2	2	7	4	2	1	2	2	7	4	8.8	5.1	8.8
P55327;H0YC42	Tumor protein D52	TPD52	21.6348	19.435	20.5349	22.4047	21.0812	21.7429	22.0259	21.8265	21.9262	-1.20806	0.183295	-1.39135	0.43285	1.13547	0.381207		11	11	11	60.3	60.3	60.3	24.327	94.106	18392000	45	4	1	6	3	7	8	4	1	6	3	7	8	4	1	6	3	7	8	22.8	6.2	39.7
O95817	BAG family molecular chaperone regulator 3	BAG3	21.7812	19.0059	20.3935	21.8696	20.1089	20.9892	21.0708	21.3943	21.2326	-0.59568	0.243365	-0.839045	0.661732	1.18375	0.559013		11	11	11	23.7	23.7	23.7	61.594	47.248	20233000	51	4	1	3	1	7	6	4	1	3	1	7	6	4	1	3	1	7	6	9.4	2.3	5.9
O60936	Nucleolar protein 3	NOL3	21.9825	19.5596	20.7711	22.0839	20.5811	21.3325	21.3996	21.5152	21.4574	-0.56146	0.12487	-0.68633	0.677616	1.09041	0.621433		9	9	9	72.1	72.1	72.1	22.629	103.49	16695000	27	3	1	5	2	7	4	3	1	5	2	7	4	3	1	5	2	7	4	25	16.3	52.9
O95292	Vesicle-associated membrane protein-associated protein B/C	VAPB	21.657	19.113	20.385	21.5968	21.3249	21.4609	21.7144	21.9456	21.83	-1.07588	0.369105	-1.44499	0.47438	1.29155	0.367295		10	10	9	42	42	42	27.228	34.42	12265000	42	4	2	5	3	3	7	4	2	5	3	3	7	3	2	4	2	2	6	21.8	9.9	25.5
Q9P265	Disco-interacting protein 2 homolog B	DIP2B	21.8153	22.4	22.1077	20.0422	20.9024	20.4723	21.5918	21.6961	21.6439	1.63535	1.17161	0.46373	3.10662	2.25264	1.3791		33	33	29	27.4	27.4	24.2	171.49	82.351	19685000	80	10	11	5	5	19	17	10	11	5	5	19	17	8	10	5	5	16	16	6.7	7.7	4
Q92905	COP9 signalosome complex subunit 5	COPS5	22.2507	22.3151	22.2829	21.0255	22.3484	21.687	22.2533	23.2149	22.7341	0.595915	1.04709	-0.451175	1.51143	2.06636	0.731447		13	13	13	49.1	49.1	49.1	37.578	75.577	36406000	49	7	3	5	5	9	5	7	3	5	5	9	5	7	3	5	5	9	5	24	9.3	17.7
Q14764	Major vault protein	MVP	22.5719	22.0417	22.3068	20.4824	20.7906	20.6365	22.2014	23.0015	22.6015	1.67033	1.965	-0.29467	3.18286	3.90411	0.815259	+	30	30	30	46.6	46.6	46.6	99.326	91.335	33953000	93	15	9	5	3	16	18	15	9	5	3	16	18	15	9	5	3	16	18	20	12.2	6.3
P51452	Dual specificity protein phosphatase 3	DUSP3	22.6537	21.1219	21.8878	19.8851	21.5615	20.7233	23.056	22.8168	22.9364	1.1645	2.21308	-1.04858	2.24156	4.63666	0.483444		7	7	7	50.8	50.8	50.8	20.478	85.536	13356000	54	3	3	3	3	7	6	3	3	3	3	7	6	3	3	3	3	7	6	19.5	19.5	19.5
P48147	Prolyl endopeptidase	PREP	22.4621	23.2917	22.8769	21.0195	22.2122	21.6159	22.6436	23.1282	22.8859	1.26102	1.27004	-0.00902	2.39664	2.41167	0.993767		30	30	30	55.5	55.5	55.5	80.699	279.01	59963000	125	16	13	10	10	15	17	16	13	10	10	15	17	16	13	10	10	15	17	28.9	25.6	18.3
P47813;O14602	Eukaryotic translation initiation factor 1A, X-chromosomal;Eukaryotic translation initiation factor 1A, Y-chromosomal	EIF1AX;EIF1AY	22.1044	22.191	22.1477	21.1696	21.5077	21.3386	22.4986	22.3317	22.4152	0.809075	1.07651	-0.267435	1.75209	2.10893	0.830795	+	6	6	6	43.1	43.1	43.1	16.46	127.51	11470000	31	3	3	3	4	4	4	3	3	3	4	4	4	3	3	3	4	4	4	22.2	22.9	22.9
O00505	Importin subunit alpha-4	KPNA3	22.2354	21.6956	21.9655	20.6563	21.5071	21.0817	22.6739	22.088	22.381	0.883775	1.29927	-0.415495	1.8452	2.46104	0.749762		14	14	11	45.9	45.9	40.3	57.81	173.45	35333000	43	6	4	3	4	11	9	6	4	3	4	11	9	4	3	3	3	9	7	15.9	9.6	8.6
O60256	Phosphoribosyl pyrophosphate synthase-associated protein 2	PRPSAP2	22.3521	22.5887	22.4704	20.2785	22.4854	21.3819	21.9947	21.8131	21.9039	1.08842	0.521975	0.566445	2.12641	1.43592	1.48087		10	9	9	36	32.2	32.2	40.925	26.09	13676000	36	4	2	3	2	9	8	3	2	3	2	8	7	3	2	3	2	8	7	9.2	4.6	8.1
Q9UHY1	Nuclear receptor-binding protein	NRBP1	21.2126	20.6053	20.9089	21.5671	20.2355	20.9013	22.5227	22.8531	22.6879	0.007655	1.78665	-1.779	1.00532	3.45014	0.291385		11	11	11	26.4	26.4	26.4	59.844	93.119	26469000	50	6	2	3	2	6	9	6	2	3	2	6	9	6	2	3	2	6	9	13.1	4.3	6.7
Q8NFA0;P35125	Ubiquitin carboxyl-terminal hydrolase 32	USP32	21.2476	21.035	21.1413	21.0664	20.3253	20.6958	22.3629	22.3983	22.3806	0.44544	1.68473	-1.23929	1.36173	3.2148	0.423581		24	24	24	17.3	17.3	17.3	181.65	106.27	18460000	88	7	4	7	5	19	14	7	4	7	5	19	14	7	4	7	5	19	14	4.7	3.1	5.4
Q15459	Splicing factor 3A subunit 1	SF3A1	20.8011	20.6864	20.7437	21.118	20.8586	20.9883	22.4412	22.3877	22.4145	-0.244535	1.42617	-1.67071	0.844088	2.68732	0.3141		18	18	18	31.8	31.8	31.8	88.885	89.785	21175000	73	3	4	6	3	14	12	3	4	6	3	14	12	3	4	6	3	14	12	4.8	5.7	7.8
P68400;Q8NEV1	Casein kinase II subunit alpha;Casein kinase II subunit alpha 3	CSNK2A1;CSNK2A3	20.5088	21.1341	20.8215	21.0423	20.5209	20.7816	23.2887	23.1468	23.2178	0.039875	2.43615	-2.39627	1.02802	5.41196	0.189954		13	13	13	46.3	46.3	46.3	45.143	84.185	22907000	50	5	2	3	3	11	12	5	2	3	3	11	12	5	2	3	3	11	12	13.3	4.9	8.7
Q14258	E3 ubiquitin/ISG15 ligase TRIM25	TRIM25	21.3056	21.1804	21.243	21.5679	20.7182	21.143	22.5799	22.7767	22.6783	0.099945	1.53526	-1.43532	1.07173	2.89841	0.369766		18	18	18	34	34	34	70.973	126.85	18294000	44	5	3	2	5	15	10	5	3	2	5	15	10	5	3	2	5	15	10	8.7	5.9	3
Q9BSJ8	Extended synaptotagmin-1	ESYT1	21.3075	21.4237	21.3656	21.2588	21.8619	21.5603	23.3426	21.9992	22.6709	-0.194745	1.11055	-1.3053	0.873727	2.15928	0.404638		23	23	23	31.7	31.7	31.7	122.85	112.69	26072000	88	5	5	4	4	20	7	5	5	4	4	20	7	5	5	4	4	20	7	5.8	5	4.9
O15372	Eukaryotic translation initiation factor 3 subunit H	EIF3H	20.6877	22.0796	21.3836	20.8588	21.3122	21.0855	22.8284	22.8152	22.8218	0.298135	1.73633	-1.4382	1.22955	3.33187	0.369029		14	14	14	54	54	54	39.93	95.468	20363000	62	3	5	4	5	9	9	3	5	4	5	9	9	3	5	4	5	9	9	8.5	14.2	11.6
Q13045	Protein flightless-1 homolog	FLII	21.5917	21.5782	21.585	21.269	21.4718	21.3704	22.9812	22.5273	22.7542	0.214565	1.38385	-1.16929	1.16035	2.60965	0.44464		31	31	31	35.1	35.1	35.1	144.75	171.68	25188000	108	10	8	5	7	25	18	10	8	5	7	25	18	10	8	5	7	25	18	9.7	7	4.6
Q9NR30	Nucleolar RNA helicase 2	DDX21	20.9588	20.8054	20.8821	22.0946	21.5644	21.8295	21.539	21.3263	21.4326	-0.94739	-0.396845	-0.550545	0.51857	0.759517	0.682762		17	17	16	27.6	27.6	25.7	87.343	86.727	20330000	69	5	4	9	5	11	6	5	4	9	5	11	6	4	3	8	4	10	6	7.4	6.1	13.7
Q9NQP4	Prefoldin subunit 4	PFDN4	21.0352	20.6087	20.822	21.8693	21.8332	21.8512	21.8492	21.8188	21.834	-1.02928	-0.01721	-1.01207	0.489955	0.988142	0.495834	+	4	4	4	37.3	37.3	37.3	15.314	106.53	7475300	29	3	2	2	3	4	3	3	2	2	3	4	3	3	2	2	3	4	3	29.1	20.1	20.1
Q9BV20	Methylthioribose-1-phosphate isomerase	MRI1	20.7252	20.391	20.5581	21.7914	21.0282	21.4098	21.6023	21.6102	21.6062	-0.85174	0.1964	-1.04814	0.554116	1.14584	0.483591		11	11	11	36.9	36.9	36.9	39.149	33.111	16523000	32	5	3	4	3	8	5	5	3	4	3	8	5	5	3	4	3	8	5	13.8	8.1	11.7
Q99733	Nucleosome assembly protein 1-like 4	NAP1L4	20.7896	20.0194	20.4045	22.717	21.0645	21.8908	21.5297	21.7888	21.6592	-1.48626	-0.23157	-1.25468	0.356938	0.851708	0.419085		10	8	8	34.1	31.2	31.2	42.823	64.09	22903000	40	5	3	4	5	9	8	3	2	3	4	7	6	3	2	3	4	7	6	12.5	10.1	12.8
Q96T76	MMS19 nucleotide excision repair protein homolog	MMS19	21.009	20.8253	20.9172	21.6486	21.8621	21.7554	22.184	21.8756	22.0298	-0.838185	0.274435	-1.11262	0.559347	1.20952	0.462453	+	22	22	22	31.9	31.9	31.9	113.29	83.83	27827000	61	6	4	7	6	15	10	6	4	7	6	15	10	6	4	7	6	15	10	8	4.4	8.3
Q92896	Golgi apparatus protein 1	GLG1	20.5744	20.5257	20.5501	22.189	21.3022	21.7456	21.6324	21.6089	21.6206	-1.19556	-0.12499	-1.07057	0.436617	0.91701	0.476131		19	19	19	18.5	18.5	18.5	134.55	98.842	17530000	59	3	4	7	8	11	12	3	4	7	8	11	12	3	4	7	8	11	12	2.5	3.5	6.6
Q14558	Phosphoribosyl pyrophosphate synthase-associated protein 1	PRPSAP1	21.7421	20.9882	21.3652	21.8778	21.4589	21.6684	22.0711	21.5872	21.8292	-0.303195	0.16079	-0.463985	0.810456	1.1179	0.724981		10	10	9	39.3	39.3	35.4	39.393	104.67	13273000	50	4	3	4	5	9	7	4	3	4	5	9	7	3	3	4	5	8	6	14.9	11	14.6
Q00535	Cyclin-dependent-like kinase 5	CDK5	21.6551	20.6956	21.1754	21.8021	21.5348	21.6685	21.5506	22.3499	21.9502	-0.493115	0.28177	-0.774885	0.710489	1.21569	0.584435		11	10	10	45.2	42.5	42.5	33.304	55.553	15231000	45	6	4	7	5	9	10	5	3	6	4	8	9	5	3	6	4	8	9	25.3	16.4	29.5
P39656	Dolichyl-diphosphooligosaccharide--protein glycosyltransferase 48 kDa subunit	DDOST	21.1972	20.7581	20.9777	21.9569	22.0923	22.0246	21.4692	21.5876	21.5284	-1.0469	-0.496185	-0.55072	0.484005	0.708979	0.682679	+	8	8	8	18.4	18.4	18.4	50.8	96.545	26179000	36	5	6	3	5	4	5	5	6	3	5	4	5	5	6	3	5	4	5	11.8	13.8	7.9
O00170	AH receptor-interacting protein	AIP	21.3239	20.7767	21.0503	21.0536	22.4363	21.7449	21.8489	22.3857	22.1173	-0.69464	0.372365	-1.067	0.617863	1.29447	0.477309		9	9	9	36.7	36.7	36.7	37.636	59.97	22307000	34	3	2	5	4	8	7	3	2	5	4	8	7	3	2	5	4	8	7	13.9	7.6	23.9
P10644	cAMP-dependent protein kinase type I-alpha regulatory subunit;cAMP-dependent protein kinase type I-alpha regulatory subunit, N-terminally processed	PRKAR1A	20.3907	21.1628	20.7767	21.3437	21.9553	21.6495	21.6303	22.0608	21.8455	-0.87276	0.196065	-1.06883	0.546101	1.14557	0.476707		10	10	8	28.1	28.1	23.9	42.981	64.458	17956000	49	2	4	3	2	6	6	2	4	3	2	6	6	2	2	2	2	6	6	7.3	11.5	9.4
Q9Y2Z0	Suppressor of G2 allele of SKP1 homolog	SUGT1	21.5011	21.4195	21.4603	21.8844	22.4976	22.191	22.4276	22.2593	22.3435	-0.730685	0.152515	-0.8832	0.602618	1.11151	0.542164		13	13	13	45.5	45.5	45.5	41.024	39.501	20031000	55	4	3	4	6	12	7	4	3	4	6	12	7	4	3	4	6	12	7	14	9.6	14
Q9NYU2;Q9NYU1	UDP-glucose:glycoprotein glucosyltransferase 1	UGGT1	20.6675	20.5924	20.63	22.3315	22.0235	22.1775	22.1186	22.2482	22.1834	-1.54754	0.005905	-1.55345	0.342093	1.0041	0.340696	+	32	32	32	28.2	28.2	28.2	177.19	193.58	21992000	81	3	7	10	7	25	19	3	7	10	7	25	19	3	7	10	7	25	19	2.2	4.9	7.3
Q92878	DNA repair protein RAD50	RAD50	20.5518	21.2256	20.8887	22.5244	20.9357	21.7301	22.4793	21.8346	22.1569	-0.84137	0.426885	-1.26825	0.558113	1.34433	0.415162		36	36	36	32	32	32	153.89	100.54	20509000	73	3	8	14	7	23	13	3	8	14	7	23	13	3	8	14	7	23	13	2.4	5.9	11.7
O60841	Eukaryotic translation initiation factor 5B	EIF5B	21.6281	21.1462	21.3872	21.9924	21.9761	21.9842	22.1985	22.1452	22.1719	-0.597075	0.18763	-0.784705	0.661093	1.13889	0.580471		23	23	23	22.5	22.5	22.5	138.83	76.801	34445000	86	10	4	8	8	18	11	10	4	8	8	18	11	10	4	8	8	18	11	11.4	4.1	7.4
P0DN76;Q01081;Q8WU68;M0R2N4	Splicing factor U2AF 35 kDa subunit	U2AF1	21.3657	21.0179	21.1918	22.211	22.3681	22.2896	21.8326	21.7993	21.816	-1.0978	-0.47363	-0.624165	0.46723	0.72015	0.648795	+	7	7	7	39.2	39.2	39.2	27.872	35.362	23599000	44	2	2	3	3	4	4	2	2	3	3	4	4	2	2	3	3	4	4	9.2	8.8	12.5
Q9UBM7	7-dehydrocholesterol reductase	DHCR7	21.7264	22.3722	22.0493	21.512	21.4926	21.5023	22.0521	21.9177	21.9849	0.54697	0.482575	0.064395	1.46101	1.39724	1.04565		7	7	7	17.1	17.1	17.1	54.489	37.764	17310000	39	2	3	4	4	6	5	2	3	4	4	6	5	2	3	4	4	6	5	7.4	9.1	10.9
Q969H8	Myeloid-derived growth factor	MYDGF	21.3691	21.6396	21.5043	21.2693	21.512	21.3907	22.2143	23.1123	22.6633	0.11367	1.27262	-1.15895	1.08198	2.416	0.447838		4	4	4	20.8	20.8	20.8	18.795	29.895	13450000	45	4	4	4	3	3	3	4	4	4	3	3	3	4	4	4	3	3	3	20.8	20.8	20.8
Q8TBX8	Phosphatidylinositol 5-phosphate 4-kinase type-2 gamma	PIP4K2C	22.0488	22.0027	22.0258	21.2383	21.5177	21.378	22.047	22.4042	22.2256	0.64774	0.847565	-0.199825	1.56671	1.79946	0.870656	+	12	12	12	29.5	29.5	29.5	47.299	64.753	30638000	34	5	2	2	3	5	7	5	2	2	3	5	7	5	2	2	3	5	7	14.7	6.7	5
Q15382	GTP-binding protein Rheb	RHEB	21.3995	22.0193	21.7094	21.3956	21.7175	21.5566	21.8273	22.8168	22.3221	0.152885	0.765515	-0.61263	1.11179	1.69998	0.654003		9	9	9	51.6	51.6	51.6	20.497	17.694	10648000	34	4	4	2	3	5	4	4	4	2	3	5	4	4	4	2	3	5	4	22.3	24.5	13
P09417	Dihydropteridine reductase	QDPR	21.9528	22.0168	21.9848	21.384	21.82	21.602	22.3367	21.8794	22.108	0.38278	0.50604	-0.12326	1.30385	1.42015	0.918111		10	10	10	59.4	59.4	59.4	25.789	117.63	22126000	45	5	3	7	3	7	5	5	3	7	3	7	5	5	3	7	3	7	5	28.7	14.3	46.7
Q01085	Nucleolysin TIAR	TIAL1	21.2382	22.3301	21.7842	21.7079	21.6213	21.6646	21.8575	22.0499	21.9537	0.11955	0.289065	-0.169515	1.0864	1.22185	0.889142		5	5	2	12.3	12.3	5.6	41.59	24.172	18315000	56	3	2	2	4	4	3	3	2	2	4	4	3	1	1	1	2	1	2	9.3	5.9	5.9
Q9NRF8	CTP synthase 2	CTPS2	21.6765	21.4406	21.5586	20.4118	21.6243	21.018	21.6838	21.6652	21.6745	0.54051	0.656495	-0.115985	1.45449	1.57625	0.922752		16	14	14	32.3	27.8	27.8	65.677	44.652	28674000	42	7	6	5	3	10	10	6	6	4	3	9	8	6	6	4	3	9	8	13.3	11.1	9.4
Q9H2G2	STE20-like serine/threonine-protein kinase	SLK	21.4507	21.7665	21.6086	20.811	22.1295	21.4702	20.8368	21.0337	20.9353	0.138375	-0.53495	0.673325	1.10066	0.690183	1.59474		19	19	18	19.8	19.8	19.1	142.69	78.776	25235000	43	5	3	3	3	12	12	5	3	3	3	12	12	4	2	3	3	11	12	6.2	2.4	2.8
Q9GZP4	PITH domain-containing protein 1	PITHD1	21.2432	22.0659	21.6545	21.5381	21.8026	21.6703	21.204	21.0994	21.1517	-0.0158	-0.518645	0.502845	0.989108	0.698027	1.41701		5	5	5	28	28	28	24.178	18.013	7774400	27	3	2	2	2	4	4	3	2	2	2	4	4	3	2	2	2	4	4	14.7	9	9
Q96GG9	DCN1-like protein 1	DCUN1D1	21.035	22.1078	21.5714	21.5522	21.793	21.6726	21.2763	21.7854	21.5308	-0.10124	-0.141765	0.040525	0.932231	0.90641	1.02849		9	9	9	33.6	33.6	33.6	30.124	41.477	19194000	38	3	4	5	4	2	6	3	4	5	4	2	6	3	4	5	4	2	6	12.7	15.1	22
Q969U7	Proteasome assembly chaperone 2	PSMG2	20.8441	21.4503	21.1472	21.3569	22.0272	21.6921	21.3664	21.6289	21.4977	-0.54487	-0.194405	-0.350465	0.685453	0.873933	0.784331		6	6	6	23.1	23.1	23.1	29.396	12.098	15450000	28	4	3	5	2	2	3	4	3	5	2	2	3	4	3	5	2	2	3	16.3	11.7	19.7
Q8TAT6	Nuclear protein localization protein 4 homolog	NPLOC4	21.7398	21.7508	21.7453	21.8937	21.0925	21.4931	21.5607	21.6373	21.599	0.25221	0.105895	0.146315	1.19103	1.07616	1.10674		17	17	17	33.4	33.4	33.4	68.119	64.562	32419000	40	7	4	3	2	8	8	7	4	3	2	8	8	7	4	3	2	8	8	11.8	6.7	5.6
Q8NE71	ATP-binding cassette sub-family F member 1	ABCF1	21.0845	22.2676	21.676	20.9369	21.5933	21.2651	20.9552	21.5801	21.2677	0.410935	0.00257	0.408365	1.32955	1.00178	1.32718		13	13	13	16.7	16.7	16.7	95.925	116.11	16702000	67	4	8	6	5	10	6	4	8	6	5	10	6	4	8	6	5	10	6	5.7	10.2	8.6
Q15019	Septin-2	Sep-02	21.3657	21.949	21.6574	21.6146	21.8612	21.7379	20.9154	22.1718	21.5436	-0.080515	-0.194305	0.11379	0.94572	0.873994	1.08207		9	9	9	36.3	36.3	36.3	41.487	106.73	20778000	48	6	2	4	4	4	6	6	2	4	4	4	6	6	2	4	4	4	6	20.8	6.9	15.5
Q03426	Mevalonate kinase	MVK	21.473	21.2295	21.3512	20.9904	21.633	21.3117	21.8173	22.3538	22.0855	0.039535	0.77382	-0.734285	1.02778	1.70979	0.601116		12	12	12	41.9	41.9	41.9	42.45	96.997	29720000	42	6	3	4	7	6	7	6	3	4	7	6	7	6	3	4	7	6	7	24.2	12.6	14.6
P61966;P56377	AP-1 complex subunit sigma-1A	AP1S1	21.5401	21.3467	21.4434	21.2395	21.6145	21.427	21.3291	21.6965	21.5128	0.016405	0.08585	-0.069445	1.01144	1.06131	0.953005		7	7	7	43.7	43.7	43.7	18.733	228.62	11842000	32	3	3	4	3	3	4	3	3	4	3	3	4	3	3	4	3	3	4	21.5	20.9	22.2
P54619	5-AMP-activated protein kinase subunit gamma-1	PRKAG1	21.8507	21.4356	21.6432	20.2423	22.2291	21.2357	22.2176	21.156	21.6868	0.407505	0.451145	-0.04364	1.32639	1.36712	0.970204		15	15	14	54.7	54.7	51.7	37.579	136.33	17822000	36	4	3	4	3	10	3	4	3	4	3	10	3	4	3	3	2	9	3	12.7	9.7	11.8
P48729;Q8N752	Casein kinase I isoform alpha	CSNK1A1	21.3527	21.298	21.3254	21.1589	21.1732	21.1661	21.1551	21.5637	21.3594	0.159325	0.193375	-0.03405	1.11676	1.14344	0.976675	+	10	10	10	34.1	34.1	34.1	38.914	40.152	18687000	51	7	3	3	4	7	4	7	3	3	4	7	4	7	3	3	4	7	4	25.8	11.9	12.2
P36776	Lon protease homolog, mitochondrial	LONP1	21.3005	21.3862	21.3433	21.602	21.3842	21.4931	21.7015	21.9622	21.8318	-0.14975	0.33877	-0.48852	0.901407	1.26468	0.712756		17	17	17	22.9	22.9	22.9	106.49	91.993	23308000	58	7	4	6	2	13	11	7	4	6	2	13	11	7	4	6	2	13	11	8.9	4.8	6.3
P04844	Dolichyl-diphosphooligosaccharide--protein glycosyltransferase subunit 2	RPN2	21.1344	21.7828	21.4586	21.3988	21.4548	21.4268	21.4569	21.8966	21.6767	0.031765	0.249935	-0.21817	1.02226	1.18915	0.859655		12	12	12	29	29	29	69.283	82.542	17834000	41	4	4	5	3	8	9	4	4	5	3	8	9	4	4	5	3	8	9	7.6	8.2	8.9
P31689	DnaJ homolog subfamily A member 1	DNAJA1	21.2124	21.1463	21.1794	21.4037	21.8147	21.6092	21.3272	21.9818	21.6545	-0.42985	0.045285	-0.475135	0.742339	1.03189	0.719399		10	10	10	40.3	40.3	40.3	44.868	77.387	21984000	42	5	3	3	4	6	5	5	3	3	4	6	5	5	3	3	4	6	5	14.9	8.6	8.6
Q9UBC2	Epidermal growth factor receptor substrate 15-like 1	EPS15L1	21.1528	19.99	20.5714	21.8278	20.9779	21.4029	20.9258	21.0322	20.979	-0.83147	-0.42386	-0.40761	0.561956	0.745428	0.753871		14	14	14	19	19	19	94.254	51.756	17815000	64	7	2	9	4	7	7	7	2	9	4	7	7	7	2	9	4	7	7	8.6	2.1	12.3
Q9NXG2	THUMP domain-containing protein 1	THUMPD1	21.3418	20.9077	21.1248	21.5389	21.066	21.3025	20.7993	20.5133	20.6563	-0.177695	-0.646165	0.46847	0.884114	0.638977	1.38364		8	8	8	35.1	35.1	35.1	39.315	36.791	21365000	45	5	5	4	5	2	3	5	5	4	5	2	3	5	5	4	5	2	3	25.5	18.1	12.2
Q96PZ0	Pseudouridylate synthase 7 homolog	PUS7	21.1142	20.5406	20.8274	21.7093	20.6449	21.1771	21.7871	20.7337	21.2604	-0.349705	0.08331	-0.433015	0.784745	1.05945	0.740712		17	17	17	34.2	34.2	34.2	75.035	81.355	19918000	46	8	4	11	6	10	5	8	4	11	6	10	5	8	4	11	6	10	5	16	7	18.8
Q15813;Q8WVB6	Tubulin-specific chaperone E	TBCE	21.4762	21.2678	21.372	21.1469	21.0773	21.1121	21.6657	21.0913	21.3785	0.259875	0.266355	-0.00648	1.19737	1.20277	0.995518		18	18	18	48	48	48	59.345	130.35	18138000	45	8	4	5	4	7	11	8	4	5	4	7	11	8	4	5	4	7	11	18.8	8	10.6
Q15436	Protein transport protein Sec23A	SEC23A	21.2671	20.7508	21.0089	21.0022	21.7802	21.3912	21.9188	20.5131	21.2159	-0.38231	-0.175315	-0.206995	0.767208	0.885574	0.86634		15	12	12	24.2	21.3	21.3	86.16	144.24	18380000	64	8	5	7	5	12	6	6	4	5	4	9	3	6	4	5	4	9	3	11.8	7.3	9.7
Q13618	Cullin-3	CUL3	21.6907	20.8368	21.2638	21.8728	21.4875	21.6802	21.5461	21.0843	21.3152	-0.416395	-0.364975	-0.05142	0.749295	0.776482	0.964986		22	22	22	30.7	30.7	30.7	88.929	241.66	24488000	72	10	5	10	4	14	8	10	5	10	4	14	8	10	5	10	4	14	8	14.8	8.2	14.3
Q13616	Cullin-1	CUL1	21.6303	21.1726	21.4014	21.3639	20.8169	21.0904	21.5979	20.6463	21.1221	0.311025	0.031695	0.27933	1.24059	1.02221	1.21363		21	21	21	32.5	32.5	32.5	89.677	62.043	21237000	39	9	4	5	2	8	8	9	4	5	2	8	8	9	4	5	2	8	8	14.7	5.2	7.6
O60884	DnaJ homolog subfamily A member 2	DNAJA2	21.3225	21.2718	21.2972	21.0669	21.058	21.0624	22.0767	21.0915	21.5841	0.23472	0.521645	-0.286925	1.17668	1.43559	0.819647	+	8	8	8	28.9	28.9	28.9	45.745	38.951	19336000	40	4	3	3	3	7	5	4	3	3	3	7	5	4	3	3	3	7	5	11.9	7.5	7.5
P23193;Q15560	Transcription elongation factor A protein 1	TCEA1	21.3471	20.638	20.9926	21.4682	21.4085	21.4384	20.9248	21.1104	21.0176	-0.4458	-0.42076	-0.02504	0.734177	0.747031	0.982793		8	8	8	25.6	25.6	25.6	33.969	40.108	15660000	35	4	4	6	4	3	4	4	4	6	4	3	4	4	4	6	4	3	4	15	13.6	21.9
Q9Y5M8	Signal recognition particle receptor subunit beta	SRPRB	20.5639	20.7184	20.6412	21.1297	21.6993	21.4145	20.8802	20.8182	20.8492	-0.773325	-0.565295	-0.20803	0.585068	0.675817	0.865719		9	9	9	40.6	40.6	40.6	29.702	106.07	9712100	32	2	4	4	3	7	4	2	4	4	3	7	4	2	4	4	3	7	4	12.2	19.9	21.8
Q9Y285	Phenylalanine--tRNA ligase alpha subunit	FARSA	19.5074	20.6522	20.0798	21.5759	20.9304	21.2532	21.1608	21.6678	21.4143	-1.17337	0.161145	-1.33452	0.443383	1.11817	0.396524		10	10	10	23.2	23.2	23.2	57.563	33.151	18496000	28	5	3	4	4	3	4	5	3	4	4	3	4	5	3	4	4	3	4	13.4	6.9	9.8
Q9H4M9	EH domain-containing protein 1	EHD1	20.5462	20.9285	20.7374	21.0363	20.878	20.9572	21.5748	21.3122	21.4435	-0.21977	0.48638	-0.70615	0.858702	1.40093	0.612954		15	15	11	35.2	35.2	25.7	60.626	54.005	17961000	39	8	2	6	4	7	4	8	2	6	4	7	4	7	2	5	3	6	3	18.9	4.5	13.3
Q9H3P7	Golgi resident protein GCP60	ACBD3	20.673	20.6621	20.6675	21.0478	21.2403	21.144	21.2746	21.0321	21.1534	-0.476525	0.00932	-0.485845	0.718707	1.00648	0.714079	+	7	7	7	19.3	19.3	19.3	60.593	113.93	17498000	36	5	4	3	3	4	4	5	4	3	3	4	4	5	4	3	3	4	4	15.9	11.7	10
Q96TA1	Niban-like protein 1	FAM129B	20.5856	20.7219	20.6537	20.2574	21.245	20.7512	22.0122	21.2546	21.6334	-0.09747	0.882205	-0.979675	0.934671	1.84319	0.507094		15	15	15	30.3	30.3	30.3	84.137	101.26	18006000	52	5	2	3	3	10	11	5	2	3	3	10	11	5	2	3	3	10	11	8.2	3.1	5
Q96P70	Importin-9	IPO9	20.5536	20.265	20.4093	20.906	21.2425	21.0742	21.604	20.7796	21.1918	-0.664945	0.11756	-0.782505	0.630713	1.0849	0.581356		20	20	20	23.2	23.2	23.2	115.96	65.689	18418000	47	4	2	7	6	12	7	4	2	7	6	12	7	4	2	7	6	12	7	4.9	2.1	6.7
Q96C86	m7GpppX diphosphatase	DCPS	20.5159	21.2615	20.8887	20.9836	21.3418	21.1627	21.8636	21.2605	21.562	-0.274015	0.39935	-0.673365	0.827015	1.31891	0.627042		10	10	10	37.1	37.1	37.1	38.608	127.82	13589000	35	2	3	2	3	9	6	2	3	2	3	9	6	2	3	2	3	9	6	7.7	11	8.6
Q86X55	Histone-arginine methyltransferase CARM1	CARM1	20.4909	20.4249	20.4579	20.5501	20.3811	20.4656	21.5861	20.3321	20.9591	-0.007685	0.493485	-0.50117	0.994687	1.40784	0.706534		10	10	10	19.9	19.9	19.9	65.853	60.44	10767000	24	6	2	4	2	7	3	6	2	4	2	7	3	6	2	4	2	7	3	10.9	3.8	6.9
Q6NXG1	Epithelial splicing regulatory protein 1	ESRP1	20.2278	20.8978	20.5628	20.2192	21.2858	20.7525	21.0967	21.5638	21.3303	-0.18971	0.57778	-0.76749	0.876782	1.49255	0.587439		11	11	10	24.5	24.5	22.8	75.585	75.556	15282000	35	3	3	3	5	3	7	3	3	3	5	3	7	2	2	2	4	2	6	6.2	6.5	5.9
Q3KQV9	UDP-N-acetylhexosamine pyrophosphorylase-like protein 1	UAP1L1	20.2922	20.5687	20.4304	21.6133	20.439	21.0261	20.8685	21.2799	21.0742	-0.595695	0.04805	-0.643745	0.661726	1.03387	0.640049		12	12	11	34.3	34.3	31.8	57.03	24.234	14942000	29	3	4	4	5	7	5	3	4	4	5	7	5	3	4	4	4	7	5	6.3	9.9	7.9
P11387	DNA topoisomerase 1	TOP1	20.2598	20.952	20.6059	21.2982	21.6225	21.4603	21.3411	21.2785	21.3098	-0.854435	-0.150545	-0.70389	0.553082	0.90091	0.613915		10	10	10	15.7	15.7	15.7	90.725	61.663	20467000	52	3	3	5	7	6	5	3	3	5	7	6	5	3	3	5	7	6	5	5	5	9
O15294	UDP-N-acetylglucosamine--peptide N-acetylglucosaminyltransferase 110 kDa subunit	OGT	20.5294	20.5811	20.5553	20.7915	21.0484	20.9199	21.0419	21.1977	21.1198	-0.36468	0.1999	-0.56458	0.776641	1.14862	0.676152		22	22	22	27.6	27.6	27.6	116.92	235.12	14270000	45	3	3	5	7	12	11	3	3	5	7	12	11	3	3	5	7	12	11	3.8	3.3	6.4
O95163	Elongator complex protein 1	IKBKAP	20.3652	20.7218	20.5435	20.8626	20.6413	20.752	22.2784	21.391	21.8347	-0.20847	1.08269	-1.29116	0.865455	2.11798	0.408622		27	27	27	25.9	25.9	25.9	150.25	160.85	13423000	69	4	6	7	7	21	12	4	6	7	7	21	12	4	6	7	7	21	12	4.2	5.3	7.1
Q9Y5X3	Sorting nexin-5	SNX5	20.2928	21.3434	20.8181	21.7535	20.5621	21.1578	21.4245	21.7864	21.6054	-0.33972	0.44765	-0.78737	0.790195	1.36382	0.579399		12	12	11	29.7	29.7	27.2	46.816	56.517	17123000	38	3	2	5	5	5	7	3	2	5	5	5	7	3	2	5	4	5	7	8.4	5.2	14.1
Q9Y2A7;P55160	Nck-associated protein 1	NCKAP1	20.7069	21.1155	20.9112	20.5373	21.0641	20.8007	21.736	22.0174	21.8767	0.110525	1.07605	-0.965525	1.07962	2.10826	0.512092		21	21	21	18.3	18.3	18.3	128.79	147.23	18734000	60	5	5	6	7	15	8	5	5	6	7	15	8	5	5	6	7	15	8	5.6	4.9	6.2
Q6P996;Q6P474	Pyridoxal-dependent decarboxylase domain-containing protein 1	PDXDC1	21.2851	21.109	21.1971	20.1377	20.3102	20.2239	21.182	22.5187	21.8503	0.97313	1.6264	-0.65327	1.9631	3.08742	0.635837	+	22	22	22	44	44	44	86.706	125.01	20887000	57	5	3	5	3	14	14	5	3	5	3	14	14	5	3	5	3	14	14	7.7	5.2	7.4
Q9HCE1	Putative helicase MOV-10	MOV10	20.8544	21.642	21.2482	21.1747	20.69	20.9324	21.3579	22.2643	21.8111	0.315835	0.878715	-0.56288	1.24473	1.83874	0.676949		21	21	21	26.8	26.8	26.8	113.67	159.63	13190000	65	4	5	8	6	12	16	4	5	8	6	12	16	4	5	8	6	12	16	4.7	6.2	10
Q9BYT8	Neurolysin, mitochondrial	NLN	24.1427	24.0722	24.1075	24.0498	24.1517	24.1007	21.443	21.9158	21.6794	0.006745	-2.4213	2.42805	1.00469	0.186688	5.38164		20	20	20	29.7	29.7	29.7	80.651	66.922	133380000	86	16	9	12	9	4	4	16	9	12	9	4	4	16	9	12	9	4	4	24.7	15.9	19.7
Q9BXJ9;Q6N069	N-alpha-acetyltransferase 15, NatA auxiliary subunit	NAA15	22.9967	23.3612	23.179	23.7629	23.6967	23.7298	22.2274	22.8611	22.5442	-0.550845	-1.18558	0.63473	0.68262	0.439649	1.55265		26	26	26	32.3	32.3	32.3	101.27	69.049	87908000	102	13	7	12	9	10	15	13	7	12	9	10	15	13	7	12	9	10	15	15.8	8.1	12.7
Q13162	Peroxiredoxin-4	PRDX4	22.8061	23.2562	23.0312	23.8593	24.2144	24.0369	22.7515	22.3474	22.5494	-1.00571	-1.48744	0.481735	0.498025	0.356644	1.39642		13	9	9	61.6	54.6	54.6	30.54	45.037	58099000	54	8	5	7	4	11	10	4	2	4	2	8	7	4	2	4	2	8	7	28	14.8	24.4
P42126	Enoyl-CoA delta isomerase 1, mitochondrial	ECI1	23.6421	23.2792	23.4607	23.9111	23.8322	23.8717	21.9666	22.2375	22.1021	-0.411015	-1.76961	1.3586	0.752094	0.293288	2.56435		8	8	8	35.4	35.4	35.4	32.816	85.074	77269000	61	5	4	6	5	7	7	5	4	6	5	7	7	5	4	6	5	7	7	17.9	14.6	21.2
F8W031;Q9Y2B0	Protein canopy homolog 2	CNPY2	23.9004	23.3435	23.622	23.9136	24.4844	24.199	22.678	22.5379	22.608	-0.57702	-1.59104	1.01402	0.670347	0.331932	2.01953		9	8	8	41.4	38	38	29.224	55.479	30077000	52	4	5	4	5	7	5	3	4	3	4	6	4	3	4	3	4	6	4	18.3	21.3	17.1
P04424;H7C0S8	Argininosuccinate lyase	ASL	23.952	23.4212	23.6866	23.6022	23.8499	23.726	21.8644	22.5421	22.2032	-0.03941	-1.52281	1.48341	0.973053	0.348006	2.79608		18	18	18	36.9	36.9	36.9	51.657	57.401	93824000	87	12	7	10	11	5	9	12	7	10	11	5	9	12	7	10	11	5	9	26.9	17.2	22
Q9Y3C6	Peptidyl-prolyl cis-trans isomerase-like 1	PPIL1	23.6076	23.6984	23.653	23.0987	23.4758	23.2873	21.9538	22.3173	22.1356	0.365725	-1.1517	1.51743	1.28853	0.450093	2.86281		6	6	6	37.3	37.3	37.3	18.237	16.875	26897000	64	6	4	4	5	5	3	6	4	4	5	5	3	6	4	4	5	5	3	37.3	29.5	27.1
Q16822;P35558	Phosphoenolpyruvate carboxykinase [GTP], mitochondrial	PCK2	23.0448	23.2031	23.1239	23.353	23.4395	23.3962	21.3753	22.0041	21.6897	-0.2723	-1.7065	1.4342	0.827998	0.306403	2.70232		22	22	22	43	43	43	70.729	137.01	80129000	122	15	11	11	13	7	6	15	11	11	13	7	6	15	11	11	13	7	6	29.8	21.1	17.8
Q16698	2,4-dienoyl-CoA reductase, mitochondrial	DECR1	23.4134	23.1663	23.2898	23.7092	23.7124	23.7108	22.4804	21.8263	22.1534	-0.420935	-1.55741	1.13647	0.74694	0.33976	2.19843		9	9	9	31.3	31.3	31.3	36.067	86.906	62442000	74	3	5	6	8	6	3	3	5	6	8	6	3	3	5	6	8	6	3	11	16.4	22.7
Q13098	COP9 signalosome complex subunit 1	GPS1	23.1901	23.3684	23.2792	23.3749	23.6634	23.5192	22.5297	22.3095	22.4196	-0.23992	-1.09953	0.859615	0.846792	0.466667	1.81455		12	12	12	31.4	31.4	31.4	55.536	75.649	72894000	92	7	6	6	9	4	6	7	6	6	9	4	6	7	6	6	9	4	6	15.7	13.2	14.1
P04181	Ornithine aminotransferase, mitochondrial;Ornithine aminotransferase, hepatic form;Ornithine aminotransferase, renal form	OAT	23.4416	22.8191	23.1303	22.9584	23.4477	23.203	22.2654	21.9528	22.1091	-0.07269	-1.09398	1.02129	0.950863	0.468467	2.02973		12	12	12	37.1	37.1	37.1	48.534	42.155	85783000	62	6	5	7	8	4	5	6	5	7	8	4	5	6	5	7	8	4	5	15.9	13.9	17.8
P55084	Trifunctional enzyme subunit beta, mitochondrial;3-ketoacyl-CoA thiolase	HADHB	23.341	23.0567	23.1988	23.1465	23.6312	23.3889	22.2306	22.2329	22.2317	-0.190045	-1.15713	0.967085	0.876578	0.448404	1.95489		14	14	14	32.3	32.3	32.3	51.294	37.203	67106000	65	10	6	7	7	4	3	10	6	7	7	4	3	10	6	7	7	4	3	22.4	12.9	14.6
Q9HDC9	Adipocyte plasma membrane-associated protein	APMAP	22.2872	23.2949	22.791	22.8716	23.9023	23.387	21.7827	22.2211	22.0019	-0.59595	-1.38505	0.789095	0.661609	0.382878	1.72799		10	10	10	22.6	22.6	22.6	46.48	19.778	67971000	39	6	4	5	7	2	3	6	4	5	7	2	3	6	4	5	7	2	3	16.1	9.9	11.8
Q07812	Apoptosis regulator BAX	BAX	22.3477	23.5894	22.9685	23.7383	23.4758	23.6071	22.2842	22.3838	22.334	-0.63851	-1.27308	0.63457	0.642376	0.413775	1.55247		6	6	6	36.5	36.5	36.5	21.184	70.993	29658000	98	6	4	4	4	4	4	6	4	4	4	4	4	6	4	4	4	4	4	36.5	29.2	29.2
P26440	Isovaleryl-CoA dehydrogenase, mitochondrial	IVD	22.4326	24.0803	23.2565	23.5025	24.1104	23.8065	21.5747	22.0603	21.8175	-0.55	-1.98897	1.43897	0.68302	0.251918	2.71128		9	9	9	24.8	24.8	24.8	46.319	66.421	98115000	48	5	6	5	6	3	4	5	6	5	6	3	4	5	6	5	6	3	4	11.8	16.8	12.3
O75821	Eukaryotic translation initiation factor 3 subunit G	EIF3G	21.9108	23.8948	22.9028	23.2202	23.6509	23.4355	22.6967	22.6807	22.6887	-0.53276	-0.74682	0.21406	0.691231	0.595916	1.15995		12	12	12	46.2	46.2	46.2	35.611	151.58	48291000	81	4	5	5	7	6	5	4	5	5	7	6	5	4	5	5	7	6	5	15.3	16.2	16.2
P08754	Guanine nucleotide-binding protein G(k) subunit alpha	GNAI3	22.2842	23.0549	22.6696	23.7626	23.6721	23.7173	22.2014	21.9993	22.1004	-1.0478	-1.61698	0.569185	0.483707	0.326017	1.48369		10	10	5	35.9	35.9	20.9	40.532	54.606	55000000	66	5	3	5	4	8	4	5	3	5	4	8	4	2	2	2	1	4	2	16.4	10.2	15
Q96I99	Succinyl-CoA ligase [GDP-forming] subunit beta, mitochondrial	SUCLG2	23.1737	22.2844	22.729	24.1646	24.0076	24.0861	22.0516	20.6775	21.3645	-1.35708	-2.72159	1.36451	0.39037	0.151607	2.57488		15	15	15	35.6	35.6	35.6	46.51	108.36	98708000	90	10	6	13	11	3	2	10	6	13	11	3	2	10	6	13	11	3	2	24.8	14.4	33.8
P31930	Cytochrome b-c1 complex subunit 1, mitochondrial	UQCRC1	22.2855	23.14	22.7127	23.9781	23.7111	23.8446	20.943	21.6739	21.3084	-1.13185	-2.53616	1.40431	0.45633	0.1724	2.64692		12	11	11	31.2	29.8	29.8	52.645	43.135	66840000	44	9	5	5	8	3	2	8	4	5	7	3	2	8	4	5	7	3	2	25.2	9.6	18.1
[truncated: 385 more rows]
[truncated: 14 more columns]
