# Supplementary material for: Label-free quantitative proteomics of the MCF-7 cellular response to a ferritin–metallodrug complex
Source: Royal Society of Chemistry journal article supplement (doi:10.1039/c9mo00158a), 2020-01-17
Supplement: c9mo00158a2.xlsx [file c9mo00158a2.xlsx]

## Sheet: 159 ANOVA +
		A = Ferritina +AUOXO3; B = Control; C= AUOXO3 no ferritin
		Significant changes 0.6 < fold values > 1.5
Protein IDs	Protein names	Gene names	LFQ intensity exp_a_01	LFQ intensity exp_a_02	Average LFQ A	LFQ intensity exp_b_01	LFQ intensity exp_b_02	Average LFQ B	LFQ intensity exp_c_01	LFQ intensity exp_c_02	Average LFQ C	Ratio A/B	Ratio C/B	Ratio A/C	FOLD A/B	FOLD C/B	FOLD A/C	ANOVA Significant	Peptides	Razor + unique peptides	Unique peptides	Sequence coverage [%]	Unique + razor sequence coverage [%]	Unique sequence coverage [%]	Mol, weight [kDa]	Score	Intensity	MS/MS count	Peptides exp_a_01	Peptides exp_a_02	Peptides exp_b_01	Peptides exp_b_02	Peptides exp_c_01	Peptides exp_c_02	Razor + unique peptides exp_a_01	Razor + unique peptides exp_a_02	Razor + unique peptides exp_b_01	Razor + unique peptides exp_b_02	Razor + unique peptides exp_c_01	Razor + unique peptides exp_c_02	Unique peptides exp_a_01	Unique peptides exp_a_02	Unique peptides exp_b_01	Unique peptides exp_b_02	Unique peptides exp_c_01	Unique peptides exp_c_02	Sequence coverage exp_a_01 [%]	Sequence coverage exp_a_02 [%]	Sequence coverage exp_b_01 [%]
P00338;P07195;Q6ZMR3;P07864	L-lactate dehydrogenase A chain	LDHA	30.1702	30.1727	30.1715	28.7227	28.901	28.8119	29.2473	24.9944	27.1208	1.3596	-1.69105	3.05064	2.56613	0.309701	8.28582	+	26	26	26	75.9	75.9	75.9	36.688	323.31	4585500000	645	18	13	12	15	22	10	18	13	12	15	22	10	18	13	12	15	22	10	44	36.7	32.2
Q04828	Aldo-keto reductase family 1 member C1	AKR1C1	29.1963	27.9638	28.5801	24.8849	25.6956	25.2903	29.7415	29.6097	29.6756	3.2898	4.38536	-1.09555	9.77977	20.8989	0.467956	+	26	26	2	78	78	10.5	36.788	323.31	2177300000	388	15	11	6	5	23	20	15	11	6	5	23	20	0	0	0	0	2	1	41.8	37.8	14.6
P26641	Elongation factor 1-gamma	EEF1G	26.9636	26.8157	26.8896	27.3495	27.4266	27.3881	27.2724	27.5832	27.4278	-0.498445	0.03973	-0.538175	0.707869	1.02792	0.688641	+	26	26	26	59.7	59.7	59.7	50.118	271.26	1129400000	473	15	14	14	19	21	20	15	14	14	19	21	20	15	14	14	19	21	20	33.9	30.4	31.4
P11586	C-1-tetrahydrofolate synthase, cytoplasmic;Methylenetetrahydrofolate dehydrogenase;Methenyltetrahydrofolate cyclohydrolase;Formyltetrahydrofolate synthetase;C-1-tetrahydrofolate synthase, cytoplasmic, N-terminally processed	MTHFD1	26.4249	26.5672	26.496	28.5948	27.9395	28.2671	28.0373	28.1681	28.1027	-1.77113	-0.164415	-1.60671	0.29298	0.89229	0.328346	+	53	53	53	61.4	61.4	61.4	101.56	323.31	1861800000	998	31	24	32	31	50	47	31	24	32	31	50	47	31	24	32	31	50	47	34	27.5	33.7
P0DMV9;P0DMV8	Heat shock 70 kDa protein 1B;Heat shock 70 kDa protein 1A	HSPA1B; HSPA1A	29.1457	28.676	28.9109	27.3281	27.6193	27.4737	28.9177	28.852	28.8848	1.43717	1.41113	0.026035	2.70788	2.65945	1.01821	+	55	50	34	70.7	66.5	42	70.051	323.31	3987300000	1014	29	30	21	28	45	35	25	28	18	26	43	34	15	16	8	14	31	23	45.1	46.8	32
P05787;P08670;P14136;P41219;P17661	Keratin, type II cytoskeletal 8	KRT8	29.3225	29.4084	29.3655	31.0356	30.5455	30.7906	28.179	28.2939	28.2365	-1.42509	-2.5541	1.129	0.372395	0.17027	2.18708	+	50	42	36	72.7	67.7	60.2	53.704	323.31	8188100000	1596	32	38	39	37	33	38	28	33	33	33	27	34	25	28	28	28	24	30	50.1	59	56.7
P42704;Q9NP80	Leucine-rich PPR motif-containing protein, mitochondrial	LRPPRC	26.1824	26.2909	26.2366	27.7523	27.4062	27.5793	26.4242	20.6748	23.5495	-1.34263	-4.02978	2.68714	0.3943	0.0612233	6.44035	+	81	81	81	62.8	62.8	62.8	157.9	323.31	934610000	728	42	33	48	45	66	7	42	33	48	45	66	7	42	33	48	45	66	7	31.1	23	32
Q14914	Prostaglandin reductase 1	PTGR1	26.6806	25.7177	26.1991	22.0276	22.5462	22.2869	27.8389	27.8809	27.8599	3.91226	5.57306	-1.6608	15.056	47.6058	0.316264	+	22	22	22	78.7	78.7	78.7	35.869	323.31	578000000	368	14	17	5	5	19	14	14	17	5	5	19	14	14	17	5	5	19	14	45	59	13.4
P25787	Proteasome subunit alpha type-2	PSMA2	25.9627	25.9121	25.9374	24.474	23.8786	24.1763	25.4322	26.5257	25.9789	1.76113	1.80265	-0.04152	3.38962	3.48859	0.971631	+	14	14	14	70.1	70.1	70.1	25.898	149.37	124920000	89	4	3	6	4	12	9	4	3	6	4	12	9	4	3	6	4	12	9	19.7	13.7	35
Q08211	ATP-dependent RNA helicase A	DHX9	25.1036	24.7201	24.9118	26.3157	25.9121	26.1139	26.7487	23.9875	25.3681	-1.20209	-0.74586	-0.45623	0.434645	0.596312	0.728888	+	58	58	58	52.4	52.4	52.4	140.96	323.31	396660000	523	19	15	25	25	55	22	19	15	25	25	55	22	19	15	25	25	55	22	15.2	12.2	20
P61313	60S ribosomal protein L15	RPL15	25.416	25.1776	25.2968	26.0085	26.1117	26.0601	26.483	26.252	26.3675	-0.763375	0.307355	-1.07073	0.589117	1.23744	0.476078	+	8	8	8	38.7	38.7	38.7	24.146	47.457	176070000	136	4	4	4	4	7	7	4	4	4	4	7	7	4	4	4	4	7	7	22.5	18.1	18.1
P49411	Elongation factor Tu, mitochondrial	TUFM	25.3335	25.0531	25.1933	26.2234	26.3182	26.2708	26.2552	26.0964	26.1758	-1.0775	-0.09504	-0.982455	0.473851	0.936246	0.506118	+	24	24	24	56.9	56.9	56.9	49.541	239.02	485670000	266	16	7	12	14	15	15	16	7	12	14	15	15	16	7	12	14	15	15	42	20.6	32.1
O75828	Carbonyl reductase [NADPH] 3	CBR3	27.2373	27.1322	27.1847	24.7853	25.3029	25.0441	25.5652	25.6311	25.5981	2.14062	0.55402	1.5866	4.40953	1.46817	3.00342	+	19	19	17	75.1	75.1	64.6	30.85	276.31	539460000	206	15	11	7	9	16	13	15	11	7	9	16	13	13	9	5	7	14	11	70.8	43.7	28.5
P48163;Q16798	NADP-dependent malic enzyme	ME1	27.4343	27.5764	27.5053	24.9677	25.672	25.3199	26.8784	26.5359	26.7071	2.18544	1.38727	0.79817	4.54865	2.61583	1.73889	+	27	27	27	61.2	61.2	61.2	64.149	307.75	892690000	334	23	13	7	11	21	20	23	13	7	11	21	20	23	13	7	11	21	20	49.7	24.1	13.6
P08195	4F2 cell-surface antigen heavy chain	SLC3A2	26.0611	26.1165	26.0888	24.4947	25.0825	24.7886	25.3071	25.5545	25.4308	1.30021	0.642235	0.657975	2.46265	1.56075	1.57787	+	25	25	25	42.4	42.4	42.4	67.993	323.31	488890000	312	20	17	14	16	20	19	20	17	14	16	20	19	20	17	14	16	20	19	34.9	31.9	24.8
Q15149	Plectin	PLEC	25.3737	25.346	25.3598	25.7764	25.6833	25.7299	25.3445	25.3108	25.3277	-0.37001	-0.40219	0.03218	0.773777	0.756709	1.02256	+	167	167	161	41.3	41.3	39.3	531.78	323.31	350120000	757	66	47	61	59	113	97	66	47	61	59	113	97	65	46	60	58	107	91	15.7	11.2	14.4
P11940;Q9H361;Q4VXU2;Q96DU9	Polyadenylate-binding protein 1	PABPC1	26.7732	26.818	26.7956	26.4219	26.3843	26.4031	24.5389	24.9999	24.7694	0.392485	-1.63368	2.02616	1.31265	0.322266	4.07319	+	31	31	19	47	47	28.6	70.67	279.21	782490000	397	21	18	19	20	21	24	21	18	19	20	21	24	12	12	12	12	11	15	32.5	28.6	29.2
P23396	40S ribosomal protein S3	RPS3	26.4128	26.4441	26.4284	25.8589	26.022	25.9404	26.8625	27.115	26.9887	0.48799	1.04831	-0.560325	1.40249	2.06811	0.678149	+	23	23	23	74.5	74.5	74.5	26.688	195.95	491630000	373	13	10	13	13	14	16	13	10	13	13	14	16	13	10	13	13	14	16	51.9	40.3	52.7
P50991	T-complex protein 1 subunit delta	CCT4	25.8712	25.6136	25.7424	26.7119	26.5013	26.6066	27.1017	26.4338	26.7677	-0.86421	0.161135	-1.02534	0.549347	1.11817	0.491293	+	28	28	28	61.8	61.8	61.8	57.924	323.31	697020000	452	21	15	20	18	19	22	21	15	20	18	19	22	21	15	20	18	19	22	49.5	32.8	42.5
Q86VP6;O75155	Cullin-associated NEDD8-dissociated protein 1	CAND1	25.9696	26.0829	26.0263	26.8289	26.5777	26.7033	26.7624	25.3273	26.0449	-0.677055	-0.658455	-0.0186	0.625441	0.633556	0.98719	+	57	57	57	46.7	46.7	46.7	136.37	323.31	688580000	553	34	28	36	36	48	34	34	28	36	36	48	34	34	28	36	36	48	34	29	26.2	29.7
O95994	Anterior gradient protein 2 homolog	AGR2	26.6158	26.2297	26.4227	27.618	27.4334	27.5257	26.2749	25.9549	26.1149	-1.10296	-1.41078	0.30782	0.465562	0.37611	1.23784	+	10	10	9	65.7	65.7	59.4	19.979	87.329	213320000	126	6	3	3	6	10	7	6	3	3	6	10	7	5	2	2	5	9	6	32.6	16	16
P48637	Glutathione synthetase	GSS	26.4514	26.3671	26.4092	25.9181	25.8629	25.8905	18.0777	24.0057	21.0417	0.518735	-4.84874	5.36747	1.4327	0.0347045	41.2828	+	23	23	23	50.8	50.8	50.8	52.384	323.31	485940000	155	14	15	14	14	0	15	14	15	14	14	0	15	14	15	14	14	0	15	36.5	31.6	32.9
P25705	ATP synthase subunit alpha, mitochondrial	ATP5A1	24.7112	24.3716	24.5414	26.4451	26.0538	26.2495	19.191	24.4641	21.8275	-1.70805	-4.42196	2.7139	0.306072	0.0466508	6.56093	+	24	24	24	50.6	50.6	50.6	59.75	171.69	331290000	163	12	8	15	12	0	15	12	8	15	12	0	15	12	8	15	12	0	15	24.6	16.5	29.5
Q9ULA0	Aspartyl aminopeptidase	DNPEP	25.0272	24.8533	24.9402	23.9318	24.1748	24.0533	19.9266	23.3148	21.6207	0.88698	-2.43257	3.31956	1.8493	0.185235	9.98356	+	16	16	16	45.7	45.7	45.7	52.428	85.201	171850000	80	10	6	6	10	0	10	10	6	6	10	0	10	10	6	6	10	0	10	25.7	17.9	18.3
Q12765	Secernin-1	SCRN1	25.536	25.2656	25.4008	24.4293	24.5747	24.502	19.0789	23.606	21.3425	0.898795	-3.15953	4.05833	1.86451	0.111914	16.6602	+	19	19	19	49	49	49	46.382	99.021	252330000	123	15	10	10	12	0	12	15	10	10	12	0	12	15	10	10	12	0	12	38.4	25.8	24.6
P43490	Nicotinamide phosphoribosyltransferase	NAMPT	25.8397	25.7738	25.8068	25.4153	25.5261	25.4707	21.9111	25.3777	23.6444	0.33606	-1.82631	2.16237	1.2623	0.281986	4.47648	+	26	26	26	62.1	62.1	62.1	55.52	195.32	395560000	191	18	13	12	11	6	20	18	13	12	11	6	20	18	13	12	11	6	20	48.1	31.4	28.9
P16152	Carbonyl reductase [NADPH] 1	CBR1	26.382	25.8681	26.1251	23.8235	24.3434	24.0834	25.9122	22.5032	24.2077	2.04166	0.124235	1.91743	4.11719	1.08993	3.77748	+	16	14	14	67.9	57.4	57.4	30.375	290.12	322390000	161	13	12	8	10	13	5	11	10	6	8	11	3	11	10	6	8	11	3	61.7	55.2	36.5
Q13838	Spliceosome RNA helicase DDX39B	DDX39B	23.9533	23.8148	23.8841	24.5964	24.5043	24.5503	22.7105	25.3127	24.0116	-0.66628	-0.53877	-0.12751	0.630129	0.688358	0.91541	+	19	19	7	53.3	53.3	22.7	48.991	123.81	151730000	148	14	5	8	7	7	15	14	5	8	7	7	15	6	1	3	1	3	5	37.1	11.7	18.5
Q9UM54	Unconventional myosin-VI	MYO6	22.9343	22.9218	22.9281	24.1823	23.8549	24.0186	24.1328	23.8737	24.0033	-1.09054	-0.015345	-1.0752	0.469584	0.98942	0.474605	+	52	52	52	47.3	47.3	47.3	149.69	323.31	95683000	195	13	12	22	20	39	28	13	12	22	20	39	28	13	12	22	20	39	28	11.3	10	16.9
Q9NR31	GTP-binding protein SAR1a	SAR1A	22.5557	22.5218	22.5388	23.4759	23.6258	23.5509	24.4751	24.3305	24.4028	-1.0121	0.851945	-1.86404	0.495824	1.80493	0.274705	+	11	11	8	58.1	58.1	42.9	22.367	32.897	32946000	59	3	3	3	2	8	6	3	3	3	2	8	6	2	1	1	1	5	4	17.2	15.7	15.7
Q15029	116 kDa U5 small nuclear ribonucleoprotein component	EFTUD2	22.2995	22.3042	22.3019	23.9628	23.8694	23.9161	24.3899	23.852	24.1209	-1.61423	0.204835	-1.81906	0.326639	1.15255	0.283405	+	41	40	40	54.6	53.6	53.6	109.43	323.31	92010000	185	13	9	18	16	35	26	12	8	17	15	34	25	12	8	17	15	34	25	13.8	9.7	20.3
P10155	60 kDa SS-A/Ro ribonucleoprotein	TROVE2	24.4293	24.2573	24.3433	23.55	23.734	23.642	23.3123	22.4856	22.899	0.701305	-0.743045	1.44435	1.62597	0.597477	2.7214	+	17	17	17	41.3	41.3	41.3	60.67	88.509	115740000	76	11	10	8	6	10	7	11	10	8	6	10	7	11	10	8	6	10	7	28.3	22.3	18
P62140	Serine/threonine-protein phosphatase PP1-beta catalytic subunit	PPP1CB	23.9922	23.7501	23.8712	23.2145	23.0603	23.1374	23.3604	22.0758	22.7181	0.73377	-0.419315	1.15308	1.66298	0.74778	2.22389	+	22	7	7	62.7	26.6	26.6	37.186	34.365	75860000	59	9	5	8	10	20	14	3	3	4	3	7	5	3	3	4	3	7	5	25.4	17.4	24.5
P38919	Eukaryotic initiation factor 4A-III;Eukaryotic initiation factor 4A-III, N-terminally processed	EIF4A3	23.4441	23.3359	23.39	24.3558	24.628	24.4919	23.9953	23.5304	23.7629	-1.10189	-0.72901	-0.37288	0.465906	0.603318	0.772239	+	19	16	16	43.6	37.7	37.7	46.871	130.06	145790000	117	15	9	10	12	12	9	12	7	7	9	10	7	12	7	7	9	10	7	33.3	20.7	22.6
Q9UBT2	SUMO-activating enzyme subunit 2	UBA2	23.2411	23.3449	23.293	24.3198	23.9643	24.142	23.0729	22.9438	23.0084	-0.849025	-1.13366	0.28464	0.55516	0.455756	1.21811	+	23	23	23	44.7	44.7	44.7	71.223	94.327	93893000	88	15	4	7	5	17	9	15	4	7	5	17	9	15	4	7	5	17	9	32	6.4	11.9
P41240;P42679	Tyrosine-protein kinase CSK	CSK	23.2234	22.881	23.0522	24.2122	24.2595	24.2359	22.9906	23.4857	23.2381	-1.18367	-0.997745	-0.18592	0.440232	0.500782	0.879088	+	18	18	18	47.3	47.3	47.3	50.704	135.85	102570000	109	13	8	8	11	10	9	13	8	8	11	10	9	13	8	8	11	10	9	36	20.9	19.6
O00571;O15523;Q9NQI0	ATP-dependent RNA helicase DDX3X;ATP-dependent RNA helicase DDX3Y	DDX3X; DDX3Y	23.277	22.9566	23.1168	24.4227	24.2864	24.3545	23.6266	23.948	23.7873	-1.23777	-0.567275	-0.67049	0.424029	0.67489	0.628293	+	25	24	24	45.2	43.5	43.5	73.243	215.87	97958000	157	14	8	13	13	18	19	13	8	12	12	18	18	13	8	12	12	18	18	27.6	14.2	23
P78527	DNA-dependent protein kinase catalytic subunit	PRKDC	23.9524	24.2021	24.0773	25.0809	25.2147	25.1478	23.9172	23.6778	23.7975	-1.07052	-1.35033	0.2798	0.476146	0.392204	1.21403	+	103	103	103	29.7	29.7	29.7	469.08	323.31	198860000	397	32	26	42	42	67	52	32	26	42	42	67	52	32	26	42	42	67	52	8.7	7.3	11.3
O43175	D-3-phosphoglycerate dehydrogenase	PHGDH	23.8605	23.6153	23.7379	25.2899	25.1522	25.221	23.753	24.2023	23.9776	-1.48315	-1.24339	-0.23976	0.357707	0.422379	0.846886	+	18	18	18	43.7	43.7	43.7	56.65	181.58	195910000	176	12	8	13	9	13	15	12	8	13	9	13	15	12	8	13	9	13	15	29.3	17.4	31.7
P51659	Peroxisomal multifunctional enzyme type 2;(3R)-hydroxyacyl-CoA dehydrogenase;Enoyl-CoA hydratase 2	HSD17B4	23.7164	23.735	23.7257	24.5499	24.8234	24.6867	22.7288	23.0408	22.8848	-0.960955	-1.80186	0.8409	0.513717	0.286806	1.79117	+	20	20	20	40.8	40.8	40.8	79.685	167.27	107050000	163	12	8	13	11	13	10	12	8	13	11	13	10	12	8	13	11	13	10	20.8	13.2	22.8
Q92973	Transportin-1	TNPO1	24.3283	24.3831	24.3557	23.6114	23.8104	23.7109	23.8455	23.81	23.8277	0.64481	0.116815	0.527995	1.56353	1.08434	1.44192	+	26	26	21	36.6	36.6	32	102.35	257.93	121310000	167	13	12	9	14	20	17	13	12	9	14	20	17	11	9	7	11	16	13	17.6	15	10.9
Q15274;C9JCJ5	Nicotinate-nucleotide pyrophosphorylase [carboxylating]	QPRT	24.504	24.1139	24.3089	23.064	23.1443	23.1042	23.6539	24.4022	24.0281	1.20478	0.92391	0.280865	2.30501	1.89725	1.21492	+	8	8	8	35.7	35.7	35.7	30.845	49.113	99160000	77	6	4	4	5	8	7	6	4	4	5	8	7	6	4	4	5	8	7	23.9	15.5	15.8
Q14019	Coactosin-like protein	COTL1	24.602	24.4009	24.5015	23.9722	23.893	23.9326	23.8932	24.0972	23.9952	0.568865	0.06261	0.506255	1.48336	1.04435	1.42036	+	10	10	10	75.4	75.4	75.4	15.945	24.684	28731000	68	5	4	2	3	6	9	5	4	2	3	6	9	5	4	2	3	6	9	30.3	25.4	13.4
O75643	U5 small nuclear ribonucleoprotein 200 kDa helicase	SNRNP200	23.2049	23.4443	23.3246	24.1997	24.3091	24.2544	24.0756	23.9829	24.0293	-0.92981	-0.22513	-0.70468	0.524927	0.855518	0.613579	+	68	68	68	38	38	38	244.5	323.31	114450000	229	17	16	16	16	44	43	17	16	16	16	44	43	17	16	16	16	44	43	8	8.1	7.7
P0DN79;P35520	Cystathionine beta-synthase	CBS	25.1563	25.4813	25.3188	24.4187	24.5278	24.4733	23.6818	23.3292	23.5055	0.845525	-0.967765	1.81329	1.79692	0.511298	3.51443	+	20	20	20	50.5	50.5	50.5	60.586	197.74	209390000	113	13	9	11	12	14	12	13	9	11	12	14	12	13	9	11	12	14	12	33.8	19.2	22
P30084	Enoyl-CoA hydratase, mitochondrial	ECHS1	24.6354	24.6117	24.6236	25.8228	26.0895	25.9561	25.1827	24.9887	25.0857	-1.33256	-0.87042	-0.46214	0.397063	0.546988	0.725909	+	16	16	16	52.8	52.8	52.8	31.387	291.9	237050000	153	7	4	11	10	13	13	7	4	11	10	13	13	7	4	11	10	13	13	27.9	15.9	48.6
P18206	Vinculin	VCL	24.68	24.9136	24.7968	25.9001	25.7654	25.8327	24.839	24.0453	24.4422	-1.03593	-1.39053	0.354595	0.487701	0.381426	1.27863	+	54	54	54	56.3	56.3	56.3	123.8	323.31	319060000	373	28	26	35	35	38	19	28	26	35	35	38	19	28	26	35	35	38	19	30	24.6	35.3
P41252	Isoleucine--tRNA ligase, cytoplasmic	IARS	24.3746	24.1978	24.2862	25.453	25.1765	25.3148	25.6538	24.7877	25.2207	-1.02856	-0.09404	-0.93452	0.490199	0.936895	0.523217	+	51	51	51	48.9	48.9	48.9	144.5	323.31	267580000	365	25	17	31	23	42	28	25	17	31	23	42	28	25	17	31	23	42	28	22.9	15	25.5
Q99460	26S proteasome non-ATPase regulatory subunit 1	PSMD1	25.0208	24.9667	24.9938	24.5378	24.6622	24.6	25.1185	25.2795	25.199	0.39377	0.598985	-0.205215	1.31382	1.51465	0.867409	+	42	42	42	58.3	58.3	58.3	105.84	323.31	281730000	376	24	20	21	18	36	31	24	20	21	18	36	31	24	20	21	18	36	31	34.6	26.2	29.5
Q9H3K6;H3BVE0	BolA-like protein 2	BOLA2	22.5412	23.6472	23.0942	18.5314	18.1626	18.347	25.1876	18.8946	22.0411	4.7472	3.69411	1.05309	26.8565	12.9431	2.07497	+	3	3	3	51.2	51.2	51.2	10.116	6.7233	20945000	17	2	2	1	1	3	0	2	2	1	1	3	0	2	2	1	1	3	0	29.1	29.1	18.6
Q9UBQ0	Vacuolar protein sorting-associated protein 29	VPS29	22.6889	24.0065	23.3477	18.8612	18.6595	18.7603	23.5075	22.4363	22.9719	4.58734	4.21158	0.37577	24.0397	18.5272	1.29753	+	7	7	7	50	50	50	20.505	57.362	27504000	52	4	2	1	1	5	2	4	2	1	1	5	2	4	2	1	1	5	2	22.5	11	7.1
O00625	Pirin	PIR	23.0722	22.951	23.0116	18.6542	18.7281	18.6911	22.9549	22.7211	22.838	4.32042	4.14682	0.1736	19.9791	17.714	1.12787	+	9	9	9	36.2	36.2	36.2	32.113	52.808	43866000	45	5	4	1	1	8	5	5	4	1	1	8	5	5	4	1	1	8	5	18.6	13.8	3.4
O60218;C9JRZ8	Aldo-keto reductase family 1 member B10	AKR1B10	23.8442	22.7043	23.2743	18.7702	19.2808	19.0255	22.2633	22.3461	22.3047	4.24877	3.27922	0.96955	19.011	9.70828	1.95823	+	12	12	12	46.5	46.5	46.5	36.019	27.776	34947000	41	10	4	0	0	6	5	10	4	0	0	6	5	10	4	0	0	6	5	37	13	0
P18085	ADP-ribosylation factor 4	ARF4	24.8971	25.4183	25.1577	18.462	18.4862	18.4741	22.6195	24.3897	23.5046	6.6836	5.0305	1.6531	102.793	32.6836	3.1451	+	9	4	4	57.2	27.2	27.2	20.511	38.398	49381000	50	3	3	2	3	9	8	2	2	1	2	4	3	2	2	1	2	4	3	20	20	11.7
P21964	Catechol O-methyltransferase	COMT	24.7632	25.3734	25.0683	18.4294	18.2116	18.3205	25.5461	26.5026	26.0243	6.74784	7.70386	-0.956015	107.474	208.493	0.515479	+	19	19	19	68.3	68.3	68.3	30.037	186.64	82806000	112	2	2	1	1	13	17	2	2	1	1	13	17	2	2	1	1	13	17	10.7	7.4	4.4
Q99584	Protein S100-A13	S100A13	18.5385	17.9092	18.2238	23.7797	21.902	22.8408	22.8168	22.8136	22.8152	-4.61701	-0.025645	-4.59137	0.0407513	0.982381	0.0414822	+	3	3	3	32.7	32.7	32.7	11.471	14.992	8509400	22	1	1	2	2	2	3	1	1	2	2	2	3	1	1	2	2	2	3	11.2	11.2	20.4
Q13283	Ras GTPase-activating protein-binding protein 1	G3BP1	18.1985	18.2523	18.2254	22.3054	21.313	21.8092	21.9136	22.0447	21.9792	-3.58372	0.170005	-3.75373	0.0834051	1.12506	0.0741338	+	9	9	9	30.3	30.3	30.3	52.164	79.401	21780000	50	2	2	5	4	6	4	2	2	5	4	6	4	2	2	5	4	6	4	5.4	9.2	13.1
P62820	Ras-related protein Rab-1A	RAB1A	18.1122	18.3693	18.2408	22.3398	22.2699	22.3049	23.2311	22.5199	22.8755	-4.06411	0.57059	-4.63471	0.0597832	1.48513	0.0402545	+	14	6	6	78.5	42.4	42.4	22.677	130.12	13267000	50	5	5	6	6	11	9	1	1	2	3	3	4	1	1	2	3	3	4	29.3	26.8	31.2
P48047;H7C0C1	ATP synthase subunit O, mitochondrial	ATP5O	18.6034	18.4271	18.5152	23.0157	22.44	22.7279	22.4753	22.051	22.2631	-4.21264	-0.46473	-3.7479	0.053935	0.724607	0.0744335	+	7	7	7	46.5	46.5	46.5	23.277	35.69	13447000	34	1	1	4	6	4	2	1	1	4	6	4	2	1	1	4	6	4	2	5.2	5.2	25.4
A0A0A6YYL6;P18621	60S ribosomal protein L17	RPL17-C18orf32; RPL17	18.2919	18.8964	18.5941	23.6853	22.8072	23.2462	25.0551	23.2683	24.1617	-4.65207	0.91546	-5.56753	0.039773	1.88617	0.0210867	+	10	10	10	32.5	32.5	32.5	26.372	58.911	28882000	46	2	0	2	4	10	3	2	0	2	4	10	3	2	0	2	4	10	3	7.9	0	7.9
P43243	Matrin-3	MATR3	17.9474	16.976	17.4617	21.0402	21.6724	21.3563	23.4378	23.0546	23.2462	-3.89461	1.88993	-5.78454	0.0672363	3.70616	0.0181418	+	22	22	22	32.1	32.1	32.1	94.622	167.99	25879000	84	2	1	4	3	20	12	2	1	4	3	20	12	2	1	4	3	20	12	2.5	1.2	5.2
P30876	DNA-directed RNA polymerase II subunit RPB2	POLR2B	18.3142	18.6906	18.5024	22.1218	21.8678	21.9948	21.7381	19.2779	20.508	-3.49242	-1.48679	-2.00563	0.0888543	0.356807	0.249026	+	25	25	25	25	25	25	133.9	82.506	16446000	52	3	1	13	10	19	0	3	1	13	10	19	0	3	1	13	10	19	0	3.2	1	12.2
O60264;P28370	SWI/SNF-related matrix-associated actin-dependent regulator of chromatin subfamily A member 5	SMARCA5	17.0215	18.7708	17.8961	22.1328	21.694	21.9134	21.9764	18.7773	20.3768	-4.0173	-1.53659	-2.48071	0.061755	0.344699	0.179156	+	25	25	25	24.5	24.5	24.5	121.9	172.34	18807000	51	2	0	8	11	20	1	2	0	8	11	20	1	2	0	8	11	20	1	1.5	0	6.9
P18754	Regulator of chromosome condensation	RCC1	20.3422	18.9067	19.6245	23.194	22.8019	22.9979	21.341	22.3168	21.8289	-3.37344	-1.16902	-2.20442	0.0964925	0.444723	0.216972	+	10	10	10	31.4	31.4	31.4	44.969	113.27	36293000	33	2	0	5	7	2	6	2	0	5	7	2	6	2	0	5	7	2	6	8.6	0	18.5
P09601	Heme oxygenase 1	HMOX1	20.9177	21.2934	21.1056	19.2232	18.3217	18.7724	23.0311	23.4885	23.2598	2.33314	4.48739	-2.15425	5.03901	22.4305	0.22465	+	12	12	12	46.9	46.9	46.9	32.818	50.699	9221200	46	3	3	0	0	10	10	3	3	0	0	10	10	3	3	0	0	10	10	12.8	11.8	0
O15551	Claudin-3	CLDN3	20.5058	21.2938	20.8998	18.5009	18.9146	18.7078	21.645	21.5751	21.61	2.19208	2.90228	-0.7102	4.56962	7.47604	0.611235	+	5	5	4	20	20	12.7	23.318	9.323	7563700	32	4	2	1	1	4	2	4	2	1	1	4	2	3	1	1	1	3	1	19.5	12.7	5.5
P48200	Iron-responsive element-binding protein 2	IREB2	20.4831	20.9797	20.7314	17.8006	17.89	17.8453	20.682	20.5338	20.6079	2.88607	2.76259	0.12348	7.39256	6.78616	1.08936	+	15	15	15	21.9	21.9	21.9	105.04	69.637	10173000	32	6	4	0	0	12	6	6	4	0	0	12	6	6	4	0	0	12	6	6.6	4.4	0
Q9UHD2	Serine/threonine-protein kinase TBK1	TBK1	19.1589	18.8927	19.0258	20.7014	20.8696	20.7855	21.2335	20.4633	20.8484	-1.75971	0.062885	-1.82259	0.295309	1.04455	0.282713	+	12	12	12	21.9	21.9	21.9	83.641	43.603	10939000	19	2	0	3	2	7	6	2	0	3	2	7	6	2	0	3	2	7	6	3.3	0	4.3
Q8TEA8	D-tyrosyl-tRNA(Tyr) deacylase 1	DTD1	18.8216	18.1495	18.4856	20.3155	20.6002	20.4579	22.2715	21.0843	21.6779	-1.97232	1.22	-3.19232	0.254844	2.32947	0.1094	+	2	2	2	14.8	14.8	14.8	23.423	35.289	8004400	19	1	1	2	2	2	2	1	1	2	2	2	2	1	1	2	2	2	2	7.2	7.2	14.8
Q5JTH9	RRP12-like protein	RRP12	19.1814	19.642	19.4117	20.9401	21.0458	20.993	22.1499	20.6713	21.4106	-1.58127	0.417645	-1.99892	0.334186	1.33575	0.250187	+	24	24	24	26.4	26.4	26.4	143.7	144.54	13501000	55	2	3	6	4	20	9	2	3	6	4	20	9	2	3	6	4	20	9	2.1	2.6	6.1
Q15021;REV__Q02790	Condensin complex subunit 1	NCAPD2	18.9512	18.5219	18.7366	20.6225	20.3503	20.4864	21.5065	20.7689	21.1377	-1.74986	0.65129	-2.40115	0.29733	1.57057	0.189313	+	23	23	23	20.1	20.1	20.1	157.18	53.31	8544400	48	3	2	4	7	17	9	3	2	4	7	17	9	3	2	4	7	17	9	2	1.6	3
O43172	U4/U6 small nuclear ribonucleoprotein Prp4	PRPF4	19.1277	17.8986	18.5131	21.2544	21.1248	21.1896	21.9095	20.4885	21.199	-2.67645	0.009435	-2.68588	0.156426	1.00656	0.155407	+	12	12	12	32	32	32	58.449	41.662	14317000	38	2	1	6	6	9	5	2	1	6	6	9	5	2	1	6	6	9	5	5	2.7	12.8
P35250	Replication factor C subunit 2	RFC2	18.4094	17.7343	18.0719	20.9244	20.5248	20.7246	21.5793	20.1246	20.852	-2.65274	0.12738	-2.78012	0.159018	1.09231	0.14558	+	5	5	5	16.7	16.7	16.7	39.157	37.449	6461100	12	0	0	3	2	2	4	0	0	3	2	2	4	0	0	3	2	2	4	0	0	11.9
Q6DD88	Atlastin-3	ATL3	19.9026	19.2822	19.5924	21.3792	21.039	21.2091	20.372	20.7967	20.5843	-1.61669	-0.62475	-0.991945	0.326082	0.648532	0.502799	+	12	12	12	35.3	35.3	35.3	60.541	126.32	16388000	34	5	1	4	3	8	6	5	1	4	3	8	6	5	1	4	3	8	6	17.6	3.5	10.7
Q0VDF9	Heat shock 70 kDa protein 14	HSPA14	20.1615	20.1155	20.1385	20.8684	21.2209	21.0447	19.9947	20.1668	20.0807	-0.90613	-0.963925	0.057795	0.533615	0.51266	1.04087	+	9	9	9	22.4	22.4	22.4	54.794	53.04	13119000	30	5	3	6	4	2	5	5	3	6	4	2	5	5	3	6	4	2	5	15.3	6.3	13.6
Q9UQ88;P21127	Cyclin-dependent kinase 11A;Cyclin-dependent kinase 11B	CDK11A; CDK11B	19.7099	19.9126	19.8112	21.0787	20.9804	21.0296	19.6913	20.2313	19.9613	-1.21832	-1.06825	-0.150065	0.429783	0.476895	0.90121	+	9	9	8	11.2	11.2	10.2	91.361	29.246	8845900	28	3	0	4	4	8	6	3	0	4	4	8	6	2	0	4	4	7	6	4	0	5.5
O00273	DNA fragmentation factor subunit alpha	DFFA	20.4222	20.344	20.3831	20.8146	20.857	20.8358	19.9848	20.2573	20.1211	-0.452735	-0.71478	0.262045	0.730656	0.609298	1.19918	+	10	10	10	34.7	34.7	34.7	36.521	45.069	9282800	34	3	3	4	5	4	6	3	3	4	5	4	6	3	3	4	5	4	6	12.4	8.2	10.9
O94826	Mitochondrial import receptor subunit TOM70	TOMM70A	21.0154	21.3976	21.2065	20.0567	20.2917	20.1742	20.1655	19.795	19.9802	1.03233	-0.193955	1.22629	2.04533	0.874206	2.33965	+	9	9	9	18.9	18.9	18.9	67.454	66.295	12168000	21	6	4	5	2	2	0	6	4	5	2	2	0	6	4	5	2	2	0	12	8.9	9.7
Q9BQ52	Zinc phosphodiesterase ELAC protein 2	ELAC2	20.8339	20.9661	20.9	21.3515	21.3017	21.3266	20.6125	21.2363	20.9244	-0.426615	-0.40219	-0.024425	0.744005	0.756709	0.983212	+	18	18	18	32.2	32.2	32.2	92.218	219.34	18596000	62	5	8	10	8	8	5	5	8	10	8	8	5	5	8	10	8	8	5	8	11	14.9
Q06124	Tyrosine-protein phosphatase non-receptor type 11	PTPN11	21.2588	21.443	21.3509	20.8033	20.8898	20.8466	20.6716	21.556	21.1138	0.504365	0.26726	0.237105	1.4185	1.20352	1.17863	+	17	17	17	37.5	37.5	37.5	68.436	53.188	13542000	49	4	5	4	3	8	10	4	5	4	3	8	10	4	5	4	3	8	10	7.9	9	7.5
Q5H9R7	Serine/threonine-protein phosphatase 6 regulatory subunit 3	PPP6R3	20.7679	20.898	20.833	19.8095	19.6523	19.7309	22.0535	18.7066	20.3801	1.10205	0.64917	0.452875	2.14659	1.56827	1.36877	+	19	19	19	26.1	26.1	26.1	97.668	117.21	18526000	58	8	3	9	5	14	2	8	3	9	5	14	2	8	3	9	5	14	2	11.3	4.1	11.5
Q13435	Splicing factor 3B subunit 2	SF3B2	20.5292	19.9865	20.2578	18.8139	19.0263	18.9201	22.1577	20.2424	21.2	1.33768	2.27989	-0.942215	2.52745	4.85643	0.520433	+	14	14	14	19	19	19	100.23	21.904	6570500	27	4	0	0	0	12	5	4	0	0	0	12	5	4	0	0	0	12	5	5.8	0	0
Q7L0Y3	Mitochondrial ribonuclease P protein 1	TRMT10C	19.4443	19.0417	19.243	22.5576	21.5472	22.0524	19.4685	18.0867	18.7776	-2.80939	-3.27481	0.465425	0.142656	0.10332	1.38072	+	13	13	13	33.3	33.3	33.3	47.346	30.993	21065000	29	3	2	11	9	1	1	3	2	11	9	1	1	3	2	11	9	1	1	11.9	8.4	26.8
P82650	28S ribosomal protein S22, mitochondrial	MRPS22	19.6228	19.1917	19.4073	21.6115	21.713	21.6623	19.677	19.7487	19.7128	-2.25501	-1.94944	-0.305575	0.209495	0.258918	0.80912	+	7	7	7	20.8	20.8	20.8	41.28	51.364	11081000	22	2	1	5	6	4	2	2	1	5	6	4	2	2	1	5	6	4	2	6.4	3.3	15
Q96LA8	Protein arginine N-methyltransferase 6	PRMT6	21.0435	21.2151	21.1293	20.5114	20.5659	20.5387	18.6717	17.5281	18.0999	0.59062	-2.43879	3.02941	1.50589	0.184438	8.16476	+	5	5	5	13.9	13.9	13.9	41.937	87.175	12301000	18	2	3	5	3	1	1	2	3	5	3	1	1	2	3	5	3	1	1	9.3	11.5	13.9
Q8NBJ7	Sulfatase-modifying factor 2	SUMF2	20.8212	21.0171	20.9191	21.8318	21.598	21.7149	18.5185	18.6958	18.6071	-0.795745	-3.10774	2.312	0.576046	0.116005	4.96569	+	8	8	8	28.9	28.9	28.9	33.843	38.946	16408000	42	5	4	6	6	2	1	5	4	6	6	2	1	5	4	6	6	2	1	19.9	15.9	23.3
P78344	Eukaryotic translation initiation factor 4 gamma 2	EIF4G2	21.3299	21.3348	21.3323	20.6667	20.8665	20.7666	18.9024	19.0412	18.9718	0.5657	-1.79482	2.36052	1.48011	0.288208	5.13555	+	13	13	13	16	16	16	102.36	69.067	15408000	43	10	5	5	5	3	5	10	5	5	5	3	5	10	5	5	5	3	5	12.1	6.3	5.8
P12830	Cadherin-1;E-Cad/CTF1;E-Cad/CTF2;E-Cad/CTF3	CDH1	20.7025	20.8184	20.7605	19.9531	20.1177	20.0354	17.8336	18.2984	18.066	0.725085	-1.96935	2.69443	1.653	0.255369	6.47298	+	8	8	8	13.3	13.3	13.3	97.455	56.807	5791600	25	4	4	4	2	2	0	4	4	4	2	2	0	4	4	4	2	2	0	6.5	5.9	5.9
P05026	Sodium/potassium-transporting ATPase subunit beta-1	ATP1B1	21.1006	21.1004	21.1005	21.8866	22.1745	22.0306	17.9664	18.5704	18.2684	-0.93008	-3.76219	2.83211	0.524829	0.0737003	7.12112	+	6	6	6	25.1	25.1	25.1	35.061	21.065	20390000	33	3	4	4	5	0	1	3	4	4	5	0	1	3	4	4	5	0	1	13.5	16.2	16.2
O75569	Interferon-inducible double-stranded RNA-dependent protein kinase activator A	PRKRA	20.7837	20.8545	20.8191	21.859	21.8439	21.8514	18.4557	18.9018	18.6788	-1.03229	-3.17264	2.14035	0.488933	0.110902	4.40871	+	7	7	7	32.3	32.3	32.3	34.404	40.793	13794000	25	4	2	4	3	4	0	4	2	4	3	4	0	4	2	4	3	4	0	15.7	8	15.7
O95848	Uridine diphosphate glucose pyrophosphatase	NUDT14	21.801	21.6449	21.7229	20.6789	20.8879	20.7834	16.78	18.3751	17.5775	0.939505	-3.20587	4.14538	1.91787	0.108377	17.6963	+	5	5	5	31.1	31.1	31.1	24.118	42.72	12530000	21	3	2	4	2	2	0	3	2	4	2	2	0	3	2	4	2	2	0	18	12.2	24.8
Q7L5D6	Golgi to ER traffic protein 4 homolog	GET4	21.2645	21.2325	21.2485	20.7651	20.9385	20.8518	21.1285	17.6013	19.3649	0.396645	-1.48698	1.88362	1.31644	0.356759	3.69001	+	7	7	7	23.9	23.9	23.9	36.504	65.233	13458000	45	4	4	3	4	5	2	4	4	3	4	5	2	4	4	3	4	5	2	15.3	14.1	10.1
P43304	Glycerol-3-phosphate dehydrogenase, mitochondrial	GPD2	20.2247	20.2168	20.2207	20.6514	20.7769	20.7142	20.8015	17.8082	19.3049	-0.49342	-1.40929	0.915865	0.710339	0.376498	1.8867	+	14	14	14	24.2	24.2	24.2	80.852	34.897	15511000	31	7	5	6	7	3	1	7	5	6	7	3	1	7	5	6	7	3	1	12.4	9.2	9.5
O75674	TOM1-like protein 1	TOM1L1	19.7231	19.582	19.6526	20.1248	20.0655	20.0952	19.71	19.7157	19.7128	-0.442585	-0.38231	-0.060275	0.735815	0.767208	0.959081	+	6	6	6	18.3	18.3	18.3	52.988	16.363	5393100	16	3	0	2	5	2	3	3	0	2	5	2	3	3	0	2	5	2	3	9.9	0	4.8
Q9Y5B9	FACT complex subunit SPT16	SUPT16H	19.5976	19.8334	19.7155	20.689	20.8371	20.763	19.2836	19.0605	19.1721	-1.04754	-1.59099	0.543445	0.483791	0.331944	1.45745	+	9	9	9	11.1	11.1	11.1	119.91	28.509	7105300	26	4	3	5	4	5	0	4	3	5	4	5	0	4	3	5	4	5	0	4.8	3.6	5.3
Q9UL15	BAG family molecular chaperone regulator 5	BAG5	20.0212	19.8138	19.9175	20.9046	20.6123	20.7584	18.6873	17.9638	18.3256	-0.84093	-2.43286	1.59193	0.558284	0.185198	3.01452	+	8	8	8	24.4	24.4	24.4	51.199	80.993	8498400	19	3	3	3	3	2	3	3	3	3	3	2	3	3	3	3	3	2	3	10.5	7.8	8.3
Q49AR2	UPF0489 protein C5orf22	C5orf22	19.4379	19.6522	19.5451	20.2802	20.1889	20.2346	19.341	18.4892	18.9151	-0.689515	-1.31952	0.63001	0.620062	0.400667	1.54758	+	4	4	4	16.1	16.1	16.1	49.967	118.04	5598300	21	3	3	3	2	0	1	3	3	3	2	0	1	3	3	3	2	0	1	9.5	9.5	14
Q13557;Q9UQM7	Calcium/calmodulin-dependent protein kinase type II subunit delta	CAMK2D	19.8724	19.7323	19.8024	21.0558	20.8592	20.9575	18.9804	19.7455	19.3629	-1.15518	-1.59459	0.439405	0.449009	0.331116	1.35604	+	8	8	6	20.2	20.2	14	56.369	30.092	8627800	26	2	2	5	7	0	1	2	2	5	7	0	1	0	1	3	5	0	1	6.2	5.8	14.4
P49354	Protein farnesyltransferase/geranylgeranyltransferase type-1 subunit alpha	FNTA	18.6002	18.6848	18.6425	19.2837	19.1851	19.2344	19.0133	18.7417	18.8775	-0.59189	-0.356895	-0.234995	0.663473	0.780843	0.849688	+	7	7	7	22.7	22.7	22.7	44.408	18.039	2846600	18	3	3	3	1	2	0	3	3	3	1	2	0	3	3	3	1	2	0	8.7	9.5	8.2
Q9H267	Vacuolar protein sorting-associated protein 33B	VPS33B	18.1378	17.8071	17.9724	20.152	19.9461	20.049	20.1588	20.2091	20.1839	-2.07664	0.134905	-2.21155	0.237065	1.09802	0.215902	+	12	12	12	23.2	23.2	23.2	70.584	23.454	4171100	23	1	1	4	4	5	7	1	1	4	4	5	7	1	1	4	4	5	7	1.8	1.8	7.3
Q6L8Q7	2,5-phosphodiesterase 12	PDE12	17.8735	18.5514	18.2124	20.5769	20.269	20.4229	20.6355	18.6659	19.6507	-2.2105	-0.77225	-1.43825	0.216059	0.585504	0.369015	+	12	12	12	30.9	30.9	30.9	67.351	62.408	5424500	18	3	3	2	4	3	3	3	3	2	4	3	3	3	3	2	4	3	3	12.8	10.5	3.6
Q9BRQ8	Apoptosis-inducing factor 2	AIFM2	19.5984	19.8963	19.7474	18.0517	18.3079	18.1798	19.3569	19.6605	19.5087	1.56758	1.32887	0.238705	2.96406	2.51206	1.17993	+	5	5	5	18.2	18.2	18.2	40.526	24.918	3308900	16	2	2	1	2	4	4	2	2	1	2	4	4	2	2	1	2	4	4	7.2	7.2	3.5
Q15031	Probable leucine--tRNA ligase, mitochondrial	LARS2	19.6618	19.5868	19.6243	19.9596	19.9402	19.9499	19.0822	17.3699	18.2261	-0.325585	-1.72384	1.39825	0.797975	0.302743	2.63582	+	4	4	4	4.3	4.3	4.3	101.97	5.051	6224500	10	2	2	3	3	0	0	2	2	3	3	0	0	2	2	3	3	0	0	2.2	2.2	3.2
Q9UPN9	E3 ubiquitin-protein ligase TRIM33	TRIM33	20.0401	19.8986	19.9693	19.3092	19.1636	19.2364	19.7435	19.2176	19.4806	0.73293	0.244145	0.488785	1.66201	1.18439	1.40326	+	9	9	9	8.8	8.8	8.8	122.53	29.621	6352700	29	5	1	3	2	6	2	5	1	3	2	6	2	5	1	3	2	6	2	5.3	1	2.8
P10253	Lysosomal alpha-glucosidase;76 kDa lysosomal alpha-glucosidase;70 kDa lysosomal alpha-glucosidase	GAA	23.9076	23.3849	23.6463	22.4152	22.3622	22.3887	21.3228	18.1958	19.7593	1.25756	-2.62939	3.88696	2.39092	0.161612	14.7942	+	11	11	11	13.1	13.1	13.1	105.32	55.564	55554000	68	10	6	5	4	3	0	10	6	5	4	3	0	10	6	5	4	3	0	12.1	7.6	6.1
O43847	Nardilysin	NRD1	23.5092	23.5828	23.546	24.6969	24.4297	24.5633	23.5336	19.6271	21.5804	-1.01733	-2.98296	1.96563	0.49403	0.126486	3.90582	+	40	40	40	38.1	38.1	38.1	131.57	323.31	120830000	197	15	19	20	19	32	4	15	19	20	19	32	4	15	19	20	19	32	4	14.5	16.3	18.2
P48506	Glutamate--cysteine ligase catalytic subunit	GCLC	25.1642	25.3345	25.2493	21.44	22.4149	21.9275	24.3807	24.4948	24.4378	3.32186	2.51029	0.811565	9.99953	5.69737	1.75511	+	30	30	30	48.2	48.2	48.2	72.765	150.1	259110000	176	19	16	7	9	18	21	19	16	7	9	18	21	19	16	7	9	18	21	35.8	26.1	10.7
P83916	Chromobox protein homolog 1	CBX1	19.0993	20.2203	19.6598	23.1801	23.2727	23.2264	22.653	22.8995	22.7762	-3.56659	-0.450195	-3.1164	0.0844011	0.731944	0.115311	+	8	7	7	34.6	25.9	25.9	21.418	80.493	18516000	35	2	1	4	3	7	5	1	1	3	2	6	4	1	1	3	2	6	4	14.6	5.9	24.3
O94906	Pre-mRNA-processing factor 6	PRPF6	19.7091	19.4906	19.5999	21.7351	20.9872	21.3612	23.6028	22.9456	23.2742	-1.76131	1.91303	-3.67434	0.29498	3.76599	0.0783274	+	27	27	27	33.4	33.4	33.4	106.92	163.78	28573000	95	4	2	10	7	21	15	4	2	10	7	21	15	4	2	10	7	21	15	4.3	2.3	12.1
Q14764	Major vault protein	MVP	22.5719	22.0417	22.3068	20.4824	20.7906	20.6365	22.2014	23.0015	22.6015	1.67033	1.965	-0.29467	3.18286	3.90411	0.815259	+	30	30	30	46.6	46.6	46.6	99.326	91.335	33953000	93	15	9	5	3	16	18	15	9	5	3	16	18	15	9	5	3	16	18	20	12.2	6.3
P47813;O14602	Eukaryotic translation initiation factor 1A, X-chromosomal;Eukaryotic translation initiation factor 1A, Y-chromosomal	EIF1AX; EIF1AY	22.1044	22.191	22.1477	21.1696	21.5077	21.3386	22.4986	22.3317	22.4152	0.809075	1.07651	-0.267435	1.75209	2.10893	0.830795	+	6	6	6	43.1	43.1	43.1	16.46	127.51	11470000	31	3	3	3	4	4	4	3	3	3	4	4	4	3	3	3	4	4	4	22.2	22.9	22.9
Q9NQP4	Prefoldin subunit 4	PFDN4	21.0352	20.6087	20.822	21.8693	21.8332	21.8512	21.8492	21.8188	21.834	-1.02928	-0.01721	-1.01207	0.489955	0.988142	0.495834	+	4	4	4	37.3	37.3	37.3	15.314	106.53	7475300	29	3	2	2	3	4	3	3	2	2	3	4	3	3	2	2	3	4	3	29.1	20.1	20.1
Q96T76	MMS19 nucleotide excision repair protein homolog	MMS19	21.009	20.8253	20.9172	21.6486	21.8621	21.7554	22.184	21.8756	22.0298	-0.838185	0.274435	-1.11262	0.559347	1.20952	0.462453	+	22	22	22	31.9	31.9	31.9	113.29	83.83	27827000	61	6	4	7	6	15	10	6	4	7	6	15	10	6	4	7	6	15	10	8	4.4	8.3
P39656	Dolichyl-diphosphooligosaccharide--protein glycosyltransferase 48 kDa subunit	DDOST	21.1972	20.7581	20.9777	21.9569	22.0923	22.0246	21.4692	21.5876	21.5284	-1.0469	-0.496185	-0.55072	0.484005	0.708979	0.682679	+	8	8	8	18.4	18.4	18.4	50.8	96.545	26179000	36	5	6	3	5	4	5	5	6	3	5	4	5	5	6	3	5	4	5	11.8	13.8	7.9
Q9NYU2;Q9NYU1	UDP-glucose:glycoprotein glucosyltransferase 1	UGGT1	20.6675	20.5924	20.63	22.3315	22.0235	22.1775	22.1186	22.2482	22.1834	-1.54754	0.005905	-1.55345	0.342093	1.0041	0.340696	+	32	32	32	28.2	28.2	28.2	177.19	193.58	21992000	81	3	7	10	7	25	19	3	7	10	7	25	19	3	7	10	7	25	19	2.2	4.9	7.3
P0DN76;Q01081;Q8WU68;M0R2N4	Splicing factor U2AF 35 kDa subunit	U2AF1	21.3657	21.0179	21.1918	22.211	22.3681	22.2896	21.8326	21.7993	21.816	-1.0978	-0.47363	-0.624165	0.46723	0.72015	0.648795	+	7	7	7	39.2	39.2	39.2	27.872	35.362	23599000	44	2	2	3	3	4	4	2	2	3	3	4	4	2	2	3	3	4	4	9.2	8.8	12.5
Q8TBX8	Phosphatidylinositol 5-phosphate 4-kinase type-2 gamma	PIP4K2C	22.0488	22.0027	22.0258	21.2383	21.5177	21.378	22.047	22.4042	22.2256	0.64774	0.847565	-0.199825	1.56671	1.79946	0.870656	+	12	12	12	29.5	29.5	29.5	47.299	64.753	30638000	34	5	2	2	3	5	7	5	2	2	3	5	7	5	2	2	3	5	7	14.7	6.7	5
P48729;Q8N752	Casein kinase I isoform alpha	CSNK1A1	21.3527	21.298	21.3254	21.1589	21.1732	21.1661	21.1551	21.5637	21.3594	0.159325	0.193375	-0.03405	1.11676	1.14344	0.976675	+	10	10	10	34.1	34.1	34.1	38.914	40.152	18687000	51	7	3	3	4	7	4	7	3	3	4	7	4	7	3	3	4	7	4	25.8	11.9	12.2
O60884	DnaJ homolog subfamily A member 2	DNAJA2	21.3225	21.2718	21.2972	21.0669	21.058	21.0624	22.0767	21.0915	21.5841	0.23472	0.521645	-0.286925	1.17668	1.43559	0.819647	+	8	8	8	28.9	28.9	28.9	45.745	38.951	19336000	40	4	3	3	3	7	5	4	3	3	3	7	5	4	3	3	3	7	5	11.9	7.5	7.5
Q9H3P7	Golgi resident protein GCP60	ACBD3	20.673	20.6621	20.6675	21.0478	21.2403	21.144	21.2746	21.0321	21.1534	-0.476525	0.00932	-0.485845	0.718707	1.00648	0.714079	+	7	7	7	19.3	19.3	19.3	60.593	113.93	17498000	36	5	4	3	3	4	4	5	4	3	3	4	4	5	4	3	3	4	4	15.9	11.7	10
Q6P996;Q6P474	Pyridoxal-dependent decarboxylase domain-containing protein 1	PDXDC1	21.2851	21.109	21.1971	20.1377	20.3102	20.2239	21.182	22.5187	21.8503	0.97313	1.6264	-0.65327	1.9631	3.08742	0.635837	+	22	22	22	44	44	44	86.706	125.01	20887000	57	5	3	5	3	14	14	5	3	5	3	14	14	5	3	5	3	14	14	7.7	5.2	7.4
P02774	Vitamin D-binding protein	GC	23.8618	23.7295	23.7957	22.5292	22.651	22.5901	21.4376	22.5902	22.0139	1.20554	-0.576215	1.78175	2.30623	0.670721	3.43843	+	5	5	5	10.3	10.3	10.3	52.963	204.32	71916000	34	4	4	3	4	4	3	4	4	3	4	4	3	4	4	3	4	4	3	10.3	10.1	5.5
O60749	Sorting nexin-2	SNX2	22.3784	22.4241	22.4012	23.0603	23.0125	23.0364	21.7532	23.1156	22.4344	-0.635125	-0.601995	-0.03313	0.643885	0.658842	0.977298	+	18	18	16	35.8	35.8	31.8	58.47	80.023	42932000	88	8	5	6	10	10	10	8	5	6	10	10	10	6	3	5	8	8	8	17.9	10.6	13.9
Q6XQN6	Nicotinate phosphoribosyltransferase	NAPRT	22.2083	22.1518	22.1801	22.8287	22.7058	22.7673	18.3996	21.4209	19.9102	-0.5872	-2.85705	2.26985	0.665634	0.13802	4.82273	+	13	13	13	27.7	27.7	27.7	57.578	124.85	35604000	51	8	4	8	9	0	5	8	4	8	9	0	5	8	4	8	9	0	5	16	8.4	17.5
Q14444	Caprin-1	CAPRIN1	22.3883	22.4126	22.4005	22.5966	22.6197	22.6081	21.0883	21.859	21.4737	-0.207645	-1.13443	0.92678	0.86595	0.455516	1.90103	+	8	8	8	17.2	17.2	17.2	78.365	67.406	42246000	58	5	3	4	3	4	4	5	3	4	3	4	4	5	3	4	3	4	4	12.3	4.8	6.1
O00264	Membrane-associated progesterone receptor component 1	PGRMC1	22.4055	22.4865	22.446	23.5496	23.3242	23.4369	21.1634	21.3615	21.2624	-0.990895	-2.17444	1.18355	0.503166	0.221528	2.27134	+	8	8	7	42.6	42.6	37.9	21.671	46.878	19719000	65	6	3	6	6	6	5	6	3	6	6	6	5	5	2	5	5	5	4	37.9	19	40.5
Q9BWF3;Q9BQ04	RNA-binding protein 4;RNA-binding protein 4B	RBM4; RBM4B	22.1849	21.9892	22.087	23.2007	22.873	23.0369	21.9412	21.5951	21.7682	-0.949845	-1.26868	0.318835	0.517688	0.415039	1.24732	+	11	11	11	41.8	41.8	41.8	40.313	73.452	19003000	49	3	3	3	5	7	4	3	3	3	5	7	4	3	3	3	5	7	4	9.1	9.6	9.1
Q92841	Probable ATP-dependent RNA helicase DDX17	DDX17	21.9145	21.7051	21.8098	23.2753	22.7994	23.0373	22.1947	21.8683	22.0315	-1.22752	-1.00581	-0.221705	0.427052	0.49799	0.857551	+	21	13	13	32	22.4	22.4	80.272	89.478	45591000	68	11	6	10	14	13	12	5	3	4	7	8	8	5	3	4	7	8	8	17	9.7	16
Q96FV2	Secernin-2	SCRN2	22.7168	22.3917	22.5543	21.4626	21.6146	21.5386	20.366	21.3722	20.8691	1.01566	-0.66953	1.68519	2.02182	0.628711	3.21582	+	9	9	9	33.9	33.9	33.9	46.596	66.133	41255000	37	5	6	3	4	2	2	5	6	3	4	2	2	5	6	3	4	2	2	17.4	23.3	8.9
Q9Y4E8	Ubiquitin carboxyl-terminal hydrolase 15	USP15	22.0793	22.0645	22.0719	22.2669	22.3227	22.2948	21.8687	22.2166	22.0427	-0.22287	-0.252125	0.029255	0.856859	0.839659	1.02049	+	28	28	26	31.7	31.7	29.8	112.42	123.5	32066000	99	11	8	11	9	22	13	11	8	11	9	22	13	10	7	9	8	20	12	12.2	8.1	12.3
P43897	Elongation factor Ts, mitochondrial	TSFM	22.7674	22.5381	22.6527	23.4542	23.7453	23.5998	23.007	20.5645	21.7857	-0.94705	-1.81404	0.86699	0.518692	0.284393	1.82385	+	9	9	9	33.8	33.8	33.8	35.39	122.5	57106000	60	7	5	5	7	6	2	7	5	5	7	6	2	7	5	5	7	6	2	31.1	18.5	18.2
Q13501	Sequestosome-1	SQSTM1	23.0227	22.4766	22.7497	20.2766	20.1172	20.1969	23.3284	22.8501	23.0893	2.55275	2.89237	-0.339615	5.86754	7.42489	0.790252	+	12	12	12	46.6	46.6	46.6	47.687	287.57	35073000	73	6	2	5	3	12	8	6	2	5	3	12	8	6	2	5	3	12	8	19.3	8.4	17.7
P48507	Glutamate--cysteine ligase regulatory subunit	GCLM	23.1736	22.9199	23.0467	21.3309	20.5357	20.9333	23.8816	24.1406	24.0111	2.11344	3.07777	-0.964325	4.32723	8.44308	0.512518	+	6	6	6	31.4	31.4	31.4	30.727	112.74	31095000	49	3	2	2	2	6	6	3	2	2	2	6	6	3	2	2	2	6	6	15.7	10.2	10.2
P50454	Serpin H1	SERPINH1	21.4826	21.0608	21.2717	22.5363	22.4849	22.5106	23.0748	22.8713	22.973	-1.23891	0.462455	-1.70136	0.423693	1.37788	0.307495	+	12	12	12	39.7	39.7	39.7	46.44	77.687	42083000	76	6	3	6	5	7	6	6	3	6	5	7	6	6	3	6	5	7	6	19.1	9.6	17
Q9BXP5	Serrate RNA effector molecule homolog	SRRT	21.8285	21.693	21.7607	22.3574	22.2634	22.3104	22.19	22.9327	22.5613	-0.549685	0.25091	-0.800595	0.683169	1.18996	0.574112	+	18	18	18	21.2	21.2	21.2	100.67	84.718	40234000	99	10	5	9	6	13	16	10	5	9	6	13	16	10	5	9	6	13	16	13.1	5.9	10.6
Q6P2Q9	Pre-mRNA-processing-splicing factor 8	PRPF8	22.1335	22.1188	22.1262	23.0922	23.3348	23.2135	24.0137	24.271	24.1423	-1.08737	0.92879	-2.01616	0.470619	1.90368	0.247215	+	80	80	80	42.6	42.6	42.6	273.6	323.31	89074000	244	14	14	14	19	52	60	14	14	14	19	52	60	14	14	14	19	52	60	7.4	5.9	5.7
P27635;Q96L21	60S ribosomal protein L10	RPL10	22.5566	22.4373	22.497	23.217	23.2624	23.2397	24.1187	23.6883	23.9035	-0.742755	0.663775	-1.40653	0.597597	1.58422	0.377218	+	14	14	14	51.4	51.4	51.4	24.604	75.965	26947000	99	4	2	3	3	13	7	4	2	3	3	13	7	4	2	3	3	13	7	16.4	10.3	10.7
O00154	Cytosolic acyl coenzyme A thioester hydrolase	ACOT7	22.8019	22.8751	22.8385	23.0669	23.0604	23.0637	23.6853	22.8412	23.2633	-0.22519	0.1996	-0.42479	0.855482	1.14838	0.744947	+	11	11	11	33.2	33.2	33.2	41.796	128.47	48365000	99	6	5	6	6	9	10	6	5	6	6	9	10	6	5	6	6	9	10	18.4	16.1	18.4
Q9NSD9	Phenylalanine--tRNA ligase beta subunit	FARSB	22.3646	22.5231	22.4438	23.4677	23.4104	23.4391	23.3535	23.0133	23.1834	-0.995235	-0.25568	-0.739555	0.501654	0.837592	0.598924	+	21	21	21	35	35	35	66.115	109.64	68078000	78	12	7	7	8	12	14	12	7	7	8	12	14	12	7	7	8	12	14	20.5	12.1	12.4
P61086	Ubiquitin-conjugating enzyme E2 K	UBE2K	22.5552	22.4521	22.5037	23.9078	23.6629	23.7853	22.9278	23.2435	23.0857	-1.28165	-0.69964	-0.582005	0.411326	0.615726	0.668035	+	14	14	14	79.5	79.5	79.5	22.406	67.463	25517000	72	5	3	3	5	9	10	5	3	3	5	9	10	5	3	3	5	9	10	29.5	18	18
P27361;P31152;Q16659	Mitogen-activated protein kinase 3	MAPK3	23.1086	22.9974	23.053	23.4322	23.3328	23.3825	22.7776	23.0421	22.9099	-0.32952	-0.472645	0.143125	0.795801	0.720642	1.10429	+	17	17	13	49.1	49.1	36.9	43.135	40.242	71979000	60	4	3	5	5	7	9	4	3	5	5	7	9	3	2	4	3	4	7	9.5	6.6	13.2
P39748	Flap endonuclease 1	FEN1	22.4066	22.1032	22.2549	23.1376	23.0456	23.0916	23.098	23.2352	23.1666	-0.836715	0.074935	-0.91165	0.559917	1.05331	0.531577	+	10	10	10	30.5	30.5	30.5	42.592	71.076	81114000	61	8	4	5	5	5	3	8	4	5	5	5	3	8	4	5	5	5	3	24.2	15.3	16.1
P43246	DNA mismatch repair protein Msh2	MSH2	23.003	22.7757	22.8893	23.5106	23.5282	23.5194	23.536	23.2183	23.3772	-0.63005	-0.14223	-0.48782	0.646154	0.906117	0.713102	+	31	31	31	40.1	40.1	40.1	104.74	271.89	98591000	116	12	8	9	12	21	18	12	8	9	12	21	18	12	8	9	12	21	18	12.3	8.7	10.4
P00966	Argininosuccinate synthase	ASS1	23.2621	23.3906	23.3264	22.9226	23.0193	22.9709	22.5225	22.1086	22.3156	0.355445	-0.65537	1.01081	1.27938	0.634913	2.01505	+	15	15	15	39.6	39.6	39.6	46.53	50.444	69419000	52	6	7	8	4	6	6	6	7	8	4	6	6	6	7	8	4	6	6	12.9	15.5	17.7
Q8N163	Cell cycle and apoptosis regulator protein 2	CCAR2	22.3496	22.1853	22.2675	22.8733	22.7678	22.8206	22.7619	22.2225	22.4922	-0.553105	-0.32837	-0.224735	0.681552	0.796436	0.855752	+	28	28	28	44.3	44.3	44.3	102.9	288.22	45245000	116	13	4	13	7	23	13	13	4	13	7	23	13	13	4	13	7	23	13	21.6	8.2	17.4
Q14980	Nuclear mitotic apparatus protein 1	NUMA1	22.3356	22.4205	22.3781	23.0208	23.0416	23.0312	22.2326	22.0248	22.1287	-0.65316	-0.90251	0.24935	0.635886	0.534955	1.18867	+	43	43	43	25.3	25.3	25.3	238.26	275.77	56919000	176	16	12	18	16	26	20	16	12	18	16	26	20	16	12	18	16	26	20	9.6	6.4	10.1
P54886	Delta-1-pyrroline-5-carboxylate synthase;Glutamate 5-kinase;Gamma-glutamyl phosphate reductase	ALDH18A1	22.8368	22.4285	22.6327	23.7121	23.6765	23.6943	23.0479	21.9832	22.5155	-1.06162	-1.17874	0.117115	0.479094	0.441739	1.08456	+	21	21	21	33.6	33.6	33.6	87.301	171.46	71253000	134	9	7	10	9	15	10	9	7	10	9	15	10	9	7	10	9	15	10	13.8	9.1	14.3
Q9UNZ2	NSFL1 cofactor p47	NSFL1C	21.6723	21.7802	21.7262	21.2925	21.2207	21.2566	21.3017	20.3743	20.838	0.469625	-0.418615	0.88824	1.38475	0.748143	1.85092	+	11	11	11	36.5	36.5	36.5	40.572	141.16	17371000	59	9	5	7	3	9	4	9	5	7	3	9	4	9	5	7	3	9	4	31.4	20.8	25.7
Q9BZZ5	Apoptosis inhibitor 5	API5	21.9394	21.7756	21.8575	21.2036	21.2232	21.2134	20.9098	20.985	20.9474	0.64414	-0.26602	0.91016	1.56281	0.831611	1.87925	+	11	11	11	24.4	24.4	24.4	59.004	118.36	22991000	30	3	5	5	3	3	4	3	5	5	3	3	4	3	5	5	3	3	4	6.5	10.3	8.2
Q9UHG3	Prenylcysteine oxidase 1	PCYOX1	22.3233	22.0629	22.1931	22.9548	23.0057	22.9802	21.9215	19.0235	20.4725	-0.78715	-2.50771	1.72057	0.579488	0.175834	3.29565	+	12	12	12	29.7	29.7	29.7	56.639	69.739	46973000	42	7	3	7	6	3	2	7	3	7	6	3	2	7	3	7	6	3	2	18.6	7.7	16.2
Q99623	Prohibitin-2	PHB2	22.4063	22.4839	22.4451	24.0173	23.674	23.8457	22.4716	19.016	20.7438	-1.4006	-3.10186	1.70125	0.37877	0.116479	3.25184	+	13	13	13	48.5	48.5	48.5	33.296	36.421	47298000	49	5	3	5	6	8	0	5	3	5	6	8	0	5	3	5	6	8	0	20.1	11.4	17.4
P54920;Q9H115	Alpha-soluble NSF attachment protein	NAPA	22.9527	22.7988	22.8758	21.9491	22.2101	22.0796	22.1079	18.2818	20.1949	0.79614	-1.88474	2.68088	1.73645	0.270793	6.41245	+	13	13	13	57.3	57.3	57.3	33.232	86.532	37967000	51	11	6	7	6	6	0	11	6	7	6	6	0	11	6	7	6	6	0	50.8	24.1	27.8
O95347	Structural maintenance of chromosomes protein 2	SMC2	21.538	21.6677	21.6029	23.3395	22.7506	23.045	21.4219	18.1357	19.7788	-1.4422	-3.26625	1.82405	0.368006	0.103935	3.54073	+	34	34	34	31.7	31.7	31.7	135.65	118	34822000	77	5	11	21	17	17	0	5	11	21	17	17	0	5	11	21	17	17	0	4.2	8.8	18.7
P10619	Lysosomal protective protein;Lysosomal protective protein 32 kDa chain;Lysosomal protective protein 20 kDa chain	CTSA	24.0667	24.0719	24.0693	22.4885	22.9322	22.7104	19.3291	17.8316	18.5803	1.35896	-4.13001	5.48897	2.565	0.0571141	44.9102	+	4	4	4	9.4	9.4	9.4	54.465	28.694	27308000	49	3	3	2	3	2	1	3	3	2	3	2	1	3	3	2	3	2	1	7.1	7.1	4.4
P49748	Very long-chain specific acyl-CoA dehydrogenase, mitochondrial	ACADVL	23.6377	24.3251	23.9814	22.4368	22.4397	22.4382	20.7744	21.4545	21.1145	1.54315	-1.32378	2.86693	2.91431	0.399487	7.29514	+	21	21	21	40	40	40	70.389	106.93	66646000	87	14	12	12	10	5	7	14	12	12	10	5	7	14	12	12	10	5	7	28.5	19.2	22
P80723	Brain acid soluble protein 1	BASP1	22.8847	22.7854	22.835	24.2632	24.2399	24.2515	18.7283	20.3272	19.5277	-1.41651	-4.72379	3.30729	0.374617	0.0378439	9.89902	+	10	10	10	69.6	69.6	69.6	22.693	80.273	88885000	139	8	7	8	10	2	3	8	7	8	10	2	3	8	7	8	10	2	3	69.2	50.7	69.6
Q10713	Mitochondrial-processing peptidase subunit alpha	PMPCA	21.8933	21.6936	21.7934	22.8412	22.5062	22.6737	18.4753	17.6173	18.0463	-0.880255	-4.62742	3.74716	0.543271	0.0404583	13.4279	+	13	13	13	30.3	30.3	30.3	58.252	17.685	29297000	31	7	5	6	3	0	5	7	5	6	3	0	5	7	5	6	3	0	5	14.1	9.1	10.9
Q9H074	Polyadenylate-binding protein-interacting protein 1	PAIP1	22.8902	22.7152	22.8027	22.1428	21.9109	22.0269	17.838	20.1639	19.0009	0.775825	-3.02595	3.80177	1.71217	0.122772	13.9459	+	4	4	4	8.1	8.1	8.1	53.524	19.244	41765000	32	3	3	4	2	0	3	3	3	4	2	0	3	3	3	4	2	0	3	6.7	6.7	8.1
Q9BZE4	Nucleolar GTP-binding protein 1	GTPBP4	20.329	20.3607	20.3449	21.3756	21.4567	21.4161	18.4862	21.1342	19.8102	-1.07129	-1.60594	0.53466	0.475895	0.32852	1.4486	+	15	15	15	26.7	26.7	26.7	73.964	39.082	13730000	49	4	2	4	4	6	9	4	2	4	4	6	9	4	2	4	4	6	9	6.6	3.9	7.1
[truncated: 13 more columns]
