# Supplementary material for: Label-free quantitative proteomics of the MCF-7 cellular response to a ferritin–metallodrug complex
Source: Royal Society of Chemistry journal article supplement (doi:10.1039/c9mo00158a), 2020-01-17
Supplement: c9mo00158a3.xlsx [file c9mo00158a3.xlsx]

## Sheet: 159 ANOVA +
	A = Ferritina +AUOXO3; B = Control; C= AUOXO3 no ferritin
	Significant changes Fold values > 1.5; Fold < 0.66
Protein IDs	Protein names	Gene names	FOLD A/B	FOLD C/B	FOLD A/C	ANOVA Significant
P10619	Lysosomal protective protein;Lysosomal protective protein 32 kDa chain;Lysosomal protective protein 20 kDa chain	CTSA	2.565	0.0571141	44.9102	+
P48637	Glutathione synthetase	GSS	1.4327	0.0347045	41.2828	+
O95848	Uridine diphosphate glucose pyrophosphatase	NUDT14	1.91787	0.108377	17.6963	+
Q12765	Secernin-1	SCRN1	1.86451	0.111914	16.6602	+
P10253	Lysosomal alpha-glucosidase;76 kDa lysosomal alpha-glucosidase;70 kDa lysosomal alpha-glucosidase	GAA	2.39092	0.161612	14.7942	+
Q9H074	Polyadenylate-binding protein-interacting protein 1	PAIP1	1.71217	0.122772	13.9459	+
Q10713	Mitochondrial-processing peptidase subunit alpha	PMPCA	0.543271	0.0404583	13.4279	+
Q9ULA0	Aspartyl aminopeptidase	DNPEP	1.8493	0.185235	9.98356	+
P80723	Brain acid soluble protein 1	BASP1	0.374617	0.0378439	9.89902	+
P00338;P07195;Q6ZMR3;P07864	L-lactate dehydrogenase A chain	LDHA	2.56613	0.309701	8.28582	+
Q96LA8	Protein arginine N-methyltransferase 6	PRMT6	1.50589	0.184438	8.16476	+
P49748	Very long-chain specific acyl-CoA dehydrogenase, mitochondrial	ACADVL	2.91431	0.399487	7.29514	+
P05026	Sodium/potassium-transporting ATPase subunit beta-1	ATP1B1	0.524829	0.0737003	7.12112	+
P25705	ATP synthase subunit alpha, mitochondrial	ATP5A1	0.306072	0.0466508	6.56093	+
P12830	Cadherin-1;E-Cad/CTF1;E-Cad/CTF2;E-Cad/CTF3	CDH1	1.653	0.255369	6.47298	+
P42704;Q9NP80	Leucine-rich PPR motif-containing protein, mitochondrial	LRPPRC	0.3943	0.0612233	6.44035	+
P54920;Q9H115	Alpha-soluble NSF attachment protein	NAPA	1.73645	0.270793	6.41245	+
P78344	Eukaryotic translation initiation factor 4 gamma 2	EIF4G2	1.48011	0.288208	5.13555	+
Q8NBJ7	Sulfatase-modifying factor 2	SUMF2	0.576046	0.116005	4.96569	+
Q6XQN6	Nicotinate phosphoribosyltransferase	NAPRT	0.665634	0.13802	4.82273	+
P43490	Nicotinamide phosphoribosyltransferase	NAMPT	1.2623	0.281986	4.47648	+
O75569	Interferon-inducible double-stranded RNA-dependent protein kinase activator A	PRKRA	0.488933	0.110902	4.40871	+
P11940;Q9H361;Q4VXU2;Q96DU9	Polyadenylate-binding protein 1	PABPC1	1.31265	0.322266	4.07319	+
O43847	Nardilysin	NRD1	0.49403	0.126486	3.90582	+
P16152	Carbonyl reductase [NADPH] 1	CBR1	4.11719	1.08993	3.77748	+
Q7L5D6	Golgi to ER traffic protein 4 homolog	GET4	1.31644	0.356759	3.69001	+
O95347	Structural maintenance of chromosomes protein 2	SMC2	0.368006	0.103935	3.54073	+
P0DN79;P35520	Cystathionine beta-synthase	CBS	1.79692	0.511298	3.51443	+
P02774	Vitamin D-binding protein	GC	2.30623	0.670721	3.43843	+
Q9UHG3	Prenylcysteine oxidase 1	PCYOX1	0.579488	0.175834	3.29565	+
Q99623	Prohibitin-2	PHB2	0.37877	0.116479	3.25184	+
Q96FV2	Secernin-2	SCRN2	2.02182	0.628711	3.21582	+
P18085	ADP-ribosylation factor 4	ARF4	102.793	32.6836	3.1451	+
Q9UL15	BAG family molecular chaperone regulator 5	BAG5	0.558284	0.185198	3.01452	+
O75828	Carbonyl reductase [NADPH] 3	CBR3	4.40953	1.46817	3.00342	+
P10155	60 kDa SS-A/Ro ribonucleoprotein	TROVE2	1.62597	0.597477	2.7214	+
Q15031	Probable leucine--tRNA ligase, mitochondrial	LARS2	0.797975	0.302743	2.63582	+
O94826	Mitochondrial import receptor subunit TOM70	TOMM70A	2.04533	0.874206	2.33965	+
O00264	Membrane-associated progesterone receptor component 1	PGRMC1	0.503166	0.221528	2.27134	+
P62140	Serine/threonine-protein phosphatase PP1-beta catalytic subunit	PPP1CB	1.66298	0.74778	2.22389	+
P05787;P08670;P14136;P41219;P17661	Keratin, type II cytoskeletal 8	KRT8	0.372395	0.17027	2.18708	+
Q9H3K6;H3BVE0	BolA-like protein 2	BOLA2	26.8565	12.9431	2.07497	+
P00966	Argininosuccinate synthase	ASS1	1.27938	0.634913	2.01505	+
O60218;C9JRZ8	Aldo-keto reductase family 1 member B10	AKR1B10	19.011	9.70828	1.95823	+
Q14444	Caprin-1	CAPRIN1	0.86595	0.455516	1.90103	+
P43304	Glycerol-3-phosphate dehydrogenase, mitochondrial	GPD2	0.710339	0.376498	1.8867	+
Q9BZZ5	Apoptosis inhibitor 5	API5	1.56281	0.831611	1.87925	+
Q9UNZ2	NSFL1 cofactor p47	NSFL1C	1.38475	0.748143	1.85092	+
P43897	Elongation factor Ts, mitochondrial	TSFM	0.518692	0.284393	1.82385	+
P51659	Peroxisomal multifunctional enzyme type 2;(3R)-hydroxyacyl-CoA dehydrogenase;Enoyl-CoA hydratase 2	HSD17B4	0.513717	0.286806	1.79117	+
P48506	Glutamate--cysteine ligase catalytic subunit	GCLC	9.99953	5.69737	1.75511	+
P48163;Q16798	NADP-dependent malic enzyme	ME1	4.54865	2.61583	1.73889	+
P08195	4F2 cell-surface antigen heavy chain	SLC3A2	2.46265	1.56075	1.57787	+
Q49AR2	UPF0489 protein C5orf22	C5orf22	0.620062	0.400667	1.54758	+
