# Supplementary material for: Label-free quantitative proteomics of the MCF-7 cellular response to a ferritin–metallodrug complex
Source: Royal Society of Chemistry journal article supplement (doi:10.1039/c9mo00158a), 2020-01-17
Supplement: c9mo00158a4.xlsx [file c9mo00158a4.xlsx]

## Sheet: 159 ANOVA +
	A = Ferritina +AUOXO3; B = Control; C= AUOXO3 no ferritin
	Significant changes Fold values > 1.5; Fold < 0.66
Protein IDs	Protein names	Gene names	FOLD A/B	FOLD C/B	FOLD A/C	ANOVA Significant
P0DN76;Q01081;Q8WU68;M0R2N4	Splicing factor U2AF 35 kDa subunit	U2AF1	0.46723	0.72015	0.648795	+
Q6P996;Q6P474	Pyridoxal-dependent decarboxylase domain-containing protein 1	PDXDC1	1.9631	3.08742	0.635837	+
O00571;O15523;Q9NQI0	ATP-dependent RNA helicase DDX3X;ATP-dependent RNA helicase DDX3Y	DDX3X; DDX3Y	0.424029	0.67489	0.628293	+
O75643	U5 small nuclear ribonucleoprotein 200 kDa helicase	SNRNP200	0.524927	0.855518	0.613579	+
O15551	Claudin-3	CLDN3	4.56962	7.47604	0.611235	+
Q9NSD9	Phenylalanine--tRNA ligase beta subunit	FARSB	0.501654	0.837592	0.598924	+
Q9BXP5	Serrate RNA effector molecule homolog	SRRT	0.683169	1.18996	0.574112	+
P39748	Flap endonuclease 1	FEN1	0.559917	1.05331	0.531577	+
P41252	Isoleucine--tRNA ligase, cytoplasmic	IARS	0.490199	0.936895	0.523217	+
Q13435	Splicing factor 3B subunit 2	SF3B2	2.52745	4.85643	0.520433	+
P21964	Catechol O-methyltransferase	COMT	107.474	208.493	0.515479	+
P48507	Glutamate--cysteine ligase regulatory subunit	GCLM	4.32723	8.44308	0.512518	+
P49411	Elongation factor Tu, mitochondrial	TUFM	0.473851	0.936246	0.506118	+
Q6DD88	Atlastin-3	ATL3	0.326082	0.648532	0.502799	+
Q9NQP4	Prefoldin subunit 4	PFDN4	0.489955	0.988142	0.495834	+
P50991	T-complex protein 1 subunit delta	CCT4	0.549347	1.11817	0.491293	+
P61313	60S ribosomal protein L15	RPL15	0.589117	1.23744	0.476078	+
Q9UM54	Unconventional myosin-VI	MYO6	0.469584	0.98942	0.474605	+
Q04828	Aldo-keto reductase family 1 member C1	AKR1C1	9.77977	20.8989	0.467956	+
Q96T76	MMS19 nucleotide excision repair protein homolog	MMS19	0.559347	1.20952	0.462453	+
P27635;Q96L21	60S ribosomal protein L10	RPL10	0.597597	1.58422	0.377218	+
Q6L8Q7	2,5-phosphodiesterase 12	PDE12	0.216059	0.585504	0.369015	+
Q9NYU2;Q9NYU1	UDP-glucose:glycoprotein glucosyltransferase 1	UGGT1	0.342093	1.0041	0.340696	+
P11586	C-1-tetrahydrofolate synthase, cytoplasmic;Methylenetetrahydrofolate dehydrogenase;Methenyltetrahydrofolate cyclohydrolase;Formyltetrahydrofolate synthetase;C-1-tetrahydrofolate synthase, cytoplasmic, N-terminally processed	MTHFD1	0.29298	0.89229	0.328346	+
Q14914	Prostaglandin reductase 1	PTGR1	15.056	47.6058	0.316264	+
P50454	Serpin H1	SERPINH1	0.423693	1.37788	0.307495	+
Q15029	116 kDa U5 small nuclear ribonucleoprotein component	EFTUD2	0.326639	1.15255	0.283405	+
Q9UHD2	Serine/threonine-protein kinase TBK1	TBK1	0.295309	1.04455	0.282713	+
Q9NR31	GTP-binding protein SAR1a	SAR1A	0.495824	1.80493	0.274705	+
Q5JTH9	RRP12-like protein	RRP12	0.334186	1.33575	0.250187	+
P30876	DNA-directed RNA polymerase II subunit RPB2	POLR2B	0.0888543	0.356807	0.249026	+
Q6P2Q9	Pre-mRNA-processing-splicing factor 8	PRPF8	0.470619	1.90368	0.247215	+
P09601	Heme oxygenase 1	HMOX1	5.03901	22.4305	0.22465	+
P18754	Regulator of chromosome condensation	RCC1	0.0964925	0.444723	0.216972	+
Q9H267	Vacuolar protein sorting-associated protein 33B	VPS33B	0.237065	1.09802	0.215902	+
Q15021;REV__Q02790	Condensin complex subunit 1	NCAPD2	0.29733	1.57057	0.189313	+
O60264;P28370	SWI/SNF-related matrix-associated actin-dependent regulator of chromatin subfamily A member 5	SMARCA5	0.061755	0.344699	0.179156	+
O43172	U4/U6 small nuclear ribonucleoprotein Prp4	PRPF4	0.156426	1.00656	0.155407	+
P35250	Replication factor C subunit 2	RFC2	0.159018	1.09231	0.14558	+
P83916	Chromobox protein homolog 1	CBX1	0.0844011	0.731944	0.115311	+
Q8TEA8	D-tyrosyl-tRNA(Tyr) deacylase 1	DTD1	0.254844	2.32947	0.1094	+
O94906	Pre-mRNA-processing factor 6	PRPF6	0.29498	3.76599	0.0783274	+
P48047;H7C0C1	ATP synthase subunit O, mitochondrial	ATP5O	0.053935	0.724607	0.0744335	+
Q13283	Ras GTPase-activating protein-binding protein 1	G3BP1	0.0834051	1.12506	0.0741338	+
Q99584	Protein S100-A13	S100A13	0.0407513	0.982381	0.0414822	+
P62820	Ras-related protein Rab-1A	RAB1A	0.0597832	1.48513	0.0402545	+
A0A0A6YYL6;P18621	60S ribosomal protein L17	RPL17-C18orf32; RPL17	0.039773	1.88617	0.0210867	+
P43243	Matrin-3	MATR3	0.0672363	3.70616	0.0181418	+

## Sheet: Downreg-splicing KEGG
	A = Ferritina +AUOXO3; B = Control; C= AUOXO3 no ferritin								EFTUD2
									PRPF4
									PRPF6
	Significant changes Fold values > 1.5; Fold < 0.66								PRPF8
									SF3B2
									SNRNP200
Protein IDs	Protein names	Gene names	FOLD A/B	FOLD C/B	FOLD A/C	ANOVA Significant			U2AF1
Q6P996;Q6P474	Pyridoxal-dependent decarboxylase domain-containing protein 1	PDXDC1	1.9631	3.08742	0.635837	+
O00571;O15523;Q9NQI0	ATP-dependent RNA helicase DDX3X;ATP-dependent RNA helicase DDX3Y	DDX3X; DDX3Y	0.424029	0.67489	0.628293	+
O15551	Claudin-3	CLDN3	4.56962	7.47604	0.611235	+
Q9NSD9	Phenylalanine--tRNA ligase beta subunit	FARSB	0.501654	0.837592	0.598924	+
Q9BXP5	Serrate RNA effector molecule homolog	SRRT	0.683169	1.18996	0.574112	+
P39748	Flap endonuclease 1	FEN1	0.559917	1.05331	0.531577	+
P41252	Isoleucine--tRNA ligase, cytoplasmic	IARS	0.490199	0.936895	0.523217	+
P21964	Catechol O-methyltransferase	COMT	107.474	208.493	0.515479	+
P48507	Glutamate--cysteine ligase regulatory subunit	GCLM	4.32723	8.44308	0.512518	+
P49411	Elongation factor Tu, mitochondrial	TUFM	0.473851	0.936246	0.506118	+
Q6DD88	Atlastin-3	ATL3	0.326082	0.648532	0.502799	+
Q9NQP4	Prefoldin subunit 4	PFDN4	0.489955	0.988142	0.495834	+
P50991	T-complex protein 1 subunit delta	CCT4	0.549347	1.11817	0.491293	+
P61313	60S ribosomal protein L15	RPL15	0.589117	1.23744	0.476078	+
Q9UM54	Unconventional myosin-VI	MYO6	0.469584	0.98942	0.474605	+
Q04828	Aldo-keto reductase family 1 member C1	AKR1C1	9.77977	20.8989	0.467956	+
Q96T76	MMS19 nucleotide excision repair protein homolog	MMS19	0.559347	1.20952	0.462453	+
P27635;Q96L21	60S ribosomal protein L10	RPL10	0.597597	1.58422	0.377218	+
Q6L8Q7	2,5-phosphodiesterase 12	PDE12	0.216059	0.585504	0.369015	+
Q9NYU2;Q9NYU1	UDP-glucose:glycoprotein glucosyltransferase 1	UGGT1	0.342093	1.0041	0.340696	+
P11586	C-1-tetrahydrofolate synthase, cytoplasmic;Methylenetetrahydrofolate dehydrogenase;Methenyltetrahydrofolate cyclohydrolase;Formyltetrahydrofolate synthetase;C-1-tetrahydrofolate synthase, cytoplasmic, N-terminally processed	MTHFD1	0.29298	0.89229	0.328346	+
Q14914	Prostaglandin reductase 1	PTGR1	15.056	47.6058	0.316264	+
P50454	Serpin H1	SERPINH1	0.423693	1.37788	0.307495	+
Q9UHD2	Serine/threonine-protein kinase TBK1	TBK1	0.295309	1.04455	0.282713	+
Q9NR31	GTP-binding protein SAR1a	SAR1A	0.495824	1.80493	0.274705	+
Q5JTH9	RRP12-like protein	RRP12	0.334186	1.33575	0.250187	+
P30876	DNA-directed RNA polymerase II subunit RPB2	POLR2B	0.0888543	0.356807	0.249026	+
P09601	Heme oxygenase 1	HMOX1	5.03901	22.4305	0.22465	+
P18754	Regulator of chromosome condensation	RCC1	0.0964925	0.444723	0.216972	+
Q9H267	Vacuolar protein sorting-associated protein 33B	VPS33B	0.237065	1.09802	0.215902	+
Q15021;REV__Q02790	Condensin complex subunit 1	NCAPD2	0.29733	1.57057	0.189313	+
O60264;P28370	SWI/SNF-related matrix-associated actin-dependent regulator of chromatin subfamily A member 5	SMARCA5	0.061755	0.344699	0.179156	+
P35250	Replication factor C subunit 2	RFC2	0.159018	1.09231	0.14558	+
P83916	Chromobox protein homolog 1	CBX1	0.0844011	0.731944	0.115311	+
Q8TEA8	D-tyrosyl-tRNA(Tyr) deacylase 1	DTD1	0.254844	2.32947	0.1094	+
P48047;H7C0C1	ATP synthase subunit O, mitochondrial	ATP5O	0.053935	0.724607	0.0744335	+
Q13283	Ras GTPase-activating protein-binding protein 1	G3BP1	0.0834051	1.12506	0.0741338	+
Q99584	Protein S100-A13	S100A13	0.0407513	0.982381	0.0414822	+
P62820	Ras-related protein Rab-1A	RAB1A	0.0597832	1.48513	0.0402545	+
A0A0A6YYL6;P18621	60S ribosomal protein L17	RPL17-C18orf32; RPL17	0.039773	1.88617	0.0210867	+
P43243	Matrin-3	MATR3	0.0672363	3.70616	0.0181418	+

## Sheet: Down reg -RNA metabolism_React
	A = Ferritina +AUOXO3; B = Control; C= AUOXO3 no ferritin
								Q13435	Q9BXP5	Q13435	O75643
								P30876	O43172	O43172	O94906
	Significant changes Fold values > 1.5; Fold < 0.66							Q15029		P30876	P27635
								Q6P2Q9		Q15029	P18621
								O75643		Q6P2Q9	P61313
Protein IDs	Protein names	Gene names	FOLD A/B	FOLD C/B	FOLD A/C	ANOVA Significant		O94906		Q9BXP5
P0DN76;Q01081;Q8WU68;M0R2N4	Splicing factor U2AF 35 kDa subunit	U2AF1	0.46723	0.72015	0.648795	+
Q6P996;Q6P474	Pyridoxal-dependent decarboxylase domain-containing protein 1	PDXDC1	1.9631	3.08742	0.635837	+
O00571;O15523;Q9NQI0	ATP-dependent RNA helicase DDX3X;ATP-dependent RNA helicase DDX3Y	DDX3X; DDX3Y	0.424029	0.67489	0.628293	+
O15551	Claudin-3	CLDN3	4.56962	7.47604	0.611235	+
Q9NSD9	Phenylalanine--tRNA ligase beta subunit	FARSB	0.501654	0.837592	0.598924	+
P39748	Flap endonuclease 1	FEN1	0.559917	1.05331	0.531577	+
P41252	Isoleucine--tRNA ligase, cytoplasmic	IARS	0.490199	0.936895	0.523217	+
P21964	Catechol O-methyltransferase	COMT	107.474	208.493	0.515479	+
P48507	Glutamate--cysteine ligase regulatory subunit	GCLM	4.32723	8.44308	0.512518	+
P49411	Elongation factor Tu, mitochondrial	TUFM	0.473851	0.936246	0.506118	+
Q6DD88	Atlastin-3	ATL3	0.326082	0.648532	0.502799	+
Q9NQP4	Prefoldin subunit 4	PFDN4	0.489955	0.988142	0.495834	+
P50991	T-complex protein 1 subunit delta	CCT4	0.549347	1.11817	0.491293	+
Q9UM54	Unconventional myosin-VI	MYO6	0.469584	0.98942	0.474605	+
Q04828	Aldo-keto reductase family 1 member C1	AKR1C1	9.77977	20.8989	0.467956	+
Q96T76	MMS19 nucleotide excision repair protein homolog	MMS19	0.559347	1.20952	0.462453	+
Q6L8Q7	2,5-phosphodiesterase 12	PDE12	0.216059	0.585504	0.369015	+
Q9NYU2;Q9NYU1	UDP-glucose:glycoprotein glucosyltransferase 1	UGGT1	0.342093	1.0041	0.340696	+
P11586	C-1-tetrahydrofolate synthase, cytoplasmic;Methylenetetrahydrofolate dehydrogenase;Methenyltetrahydrofolate cyclohydrolase;Formyltetrahydrofolate synthetase;C-1-tetrahydrofolate synthase, cytoplasmic, N-terminally processed	MTHFD1	0.29298	0.89229	0.328346	+
Q14914	Prostaglandin reductase 1	PTGR1	15.056	47.6058	0.316264	+
P50454	Serpin H1	SERPINH1	0.423693	1.37788	0.307495	+
Q9UHD2	Serine/threonine-protein kinase TBK1	TBK1	0.295309	1.04455	0.282713	+
Q9NR31	GTP-binding protein SAR1a	SAR1A	0.495824	1.80493	0.274705	+
Q5JTH9	RRP12-like protein	RRP12	0.334186	1.33575	0.250187	+
P09601	Heme oxygenase 1	HMOX1	5.03901	22.4305	0.22465	+
P18754	Regulator of chromosome condensation	RCC1	0.0964925	0.444723	0.216972	+
Q9H267	Vacuolar protein sorting-associated protein 33B	VPS33B	0.237065	1.09802	0.215902	+
O60264;P28370	SWI/SNF-related matrix-associated actin-dependent regulator of chromatin subfamily A member 5	SMARCA5	0.061755	0.344699	0.179156	+
P35250	Replication factor C subunit 2	RFC2	0.159018	1.09231	0.14558	+
P83916	Chromobox protein homolog 1	CBX1	0.0844011	0.731944	0.115311	+
Q8TEA8	D-tyrosyl-tRNA(Tyr) deacylase 1	DTD1	0.254844	2.32947	0.1094	+
P48047;H7C0C1	ATP synthase subunit O, mitochondrial	ATP5O	0.053935	0.724607	0.0744335	+
Q13283	Ras GTPase-activating protein-binding protein 1	G3BP1	0.0834051	1.12506	0.0741338	+
Q99584	Protein S100-A13	S100A13	0.0407513	0.982381	0.0414822	+
P62820	Ras-related protein Rab-1A	RAB1A	0.0597832	1.48513	0.0402545	+
P43243	Matrin-3	MATR3	0.0672363	3.70616	0.0181418	+
